# Supplementary material for: Temporal Network Based Analysis of Cell Specific Vein Graft Transcriptome Defines Key Pathways and Hub Genes in Implantation Injury
Source: PubMed Central journal article supplement (PMC3376111; doi:10.1371/journal.pone.0039123), 2012-06-15
Supplement: pone.0039123.s012.pdf [file pone.0039123.s012.pdf]

Table S2: List of unique differentially expressed genes

| Gene SYMBOL | EN2H   | EC-Fold Change |        |        | EN30D  | SM2H   | SMC-Fold Change |        |        | SM30D | Venn Diagram Zones                                    |
|-------------|--------|----------------|--------|--------|--------|--------|-----------------|--------|--------|-------|-------------------------------------------------------|
|             |        | EN12H          | EN24H  | EN7D   |        |        | SM12H           | SM24H  | SM7D   |       |                                                       |
| SLC22A1     | -2.101 | -3.038         | -2.653 |        |        | -1.288 | -2.828          | -3.377 | -2.277 |       | EN SM Down.12H.24H.7D, SM Only Down.30D               |
| ENPP2       |        |                |        | -2.86  | -3.521 | -1.257 | -3.411          | -2.492 | -2.626 |       | EN SM Down.7D.30D, SM Only Down.12H.24H               |
| BTC         | -2.282 | -3.677         |        |        | -3.267 | -2.579 | -3.111          | -3.068 |        |       | EN Only Down.30D, EN SM Down.12H.24H, SM Only Down.7D |
| HPSE2       |        | -3.063         | -2.812 |        | -2.448 |        | -3.301          | -2.563 | -1.38  |       | EN Only Down.30D, EN SM Down.12H.24H, SM Only Down.7D |
| CCDC88C     | -1.829 | -2.05          | -1.581 | -2.022 |        | -2.121 |                 | -1.525 |        |       | EN Only Down.24H, EN SM Down.12H.7D                   |
| ADHFE1      |        | -2.009         | -1.695 | -1.151 |        | -1.697 | -1.523          | -1.11  |        |       | EN SM Down.12H.24H.7D                                 |
| AGPHD1      |        | -2.666         | -2.898 | -1.441 |        | -3.862 | -2.548          | -1.538 |        |       | EN SM Down.12H.24H.7D                                 |
| AKAP6       |        | -3.406         | -2.316 | -2.513 |        | -2.685 | -2.589          | -1.595 |        |       | EN SM Down.12H.24H.7D                                 |
| ALDH7A1     |        | -1.858         | -2.045 | -1.461 |        | -1.947 | -1.379          | -1.514 |        |       | EN SM Down.12H.24H.7D                                 |
| ANIGD2      |        | -3.871         | -3.426 | 3.58   |        | -4.953 | -3.685          | -3.312 |        |       | EN SM Down.12H.24H.7D                                 |
| ANGPT11     |        | -1.231         | -4.031 | -2.566 |        | -3.667 | -2.873          | -1.876 |        |       | EN SM Down.12H.24H.7D                                 |
| ARMC4       |        | -2.237         | -2.315 | -1.991 |        | -2.422 | -2.429          | -1.394 |        |       | EN SM Down.12H.24H.7D                                 |
| CALCOCO1    |        | -2.711         | -2.676 | -1.611 |        | -3.295 | -3.493          | -1.687 |        |       | EN SM Down.12H.24H.7D                                 |
| CCDC3       |        | -1.77          | -2.194 | -3.223 |        | -1.43  | -1.718          | -1.595 |        |       | EN SM Down.12H.24H.7D                                 |
| CHN1        |        | -2.185         | -1.768 | -1.289 |        | -3.353 | -1.985          | -1.337 |        |       | EN SM Down.12H.24H.7D                                 |
| CKM         |        | -3.385         | -3.955 | -3.134 |        | -3.478 | -3.514          | -1.453 |        |       | EN SM Down.12H.24H.7D                                 |
| COCH        |        | -1.652         | -3.11  | -3.741 |        | -1.809 | -2.6            | -2.929 |        |       | EN SM Down.12H.24H.7D                                 |
| COL14A1     |        | -2.558         | -3.852 | -3.339 |        | -2.179 | -1.995          | -1.702 |        |       | EN SM Down.12H.24H.7D                                 |
| DES         |        | -1.952         | -2.237 | -1.777 |        | -1.969 | -1.724          | -1.463 |        |       | EN SM Down.12H.24H.7D                                 |
| DND         |        | -2.405         | -2.916 | -2.899 |        | -2.349 | -2.448          | -2.59  |        |       | EN SM Down.12H.24H.7D                                 |
| DTNA        |        | -2.832         | -3.397 | -3.438 |        | -2.723 | -2.881          | -2.981 |        |       | EN SM Down.12H.24H.7D                                 |
| EBF1        |        | -2.329         | -2.423 | -2.092 |        | -2.119 | -1.852          | -1.354 |        |       | EN SM Down.12H.24H.7D                                 |
| FHL1        |        | -2.736         | -2.968 | -1.438 |        | -3.346 | -2.169          | -1.215 |        |       | EN SM Down.12H.24H.7D                                 |
| FLIP1L      |        | -2.193         | -1.946 | -1.324 |        | -2.287 | -2.533          | -1.633 |        |       | EN SM Down.12H.24H.7D                                 |
| FN3K        |        | -3.748         | -3.455 | -2.167 |        | -3.642 | -3.986          | -2.382 |        |       | EN SM Down.12H.24H.7D                                 |
| GNAO1       |        | -1.793         | -1.412 | -1.329 |        | -2.087 | -1.685          | -1.163 |        |       | EN SM Down.12H.24H.7D                                 |
| GRM6A       |        | -4.068         | -3.047 | -1.977 |        | -4.158 | -2.459          | -2.637 |        |       | EN SM Down.12H.24H.7D                                 |
| GSN         |        | -1.491         | -2.028 | -1.984 |        | -1.254 | -1.504          | -2.56  |        |       | EN SM Down.12H.24H.7D                                 |
| GULP1       |        | -2.119         | -2.264 | -2.079 |        | -1.873 | -2.05           | -1.153 |        |       | EN SM Down.12H.24H.7D                                 |
| HSPA2       |        | -2.305         | -2.507 | -1.202 |        | -2.872 | -2.203          | -1.214 |        |       | EN SM Down.12H.24H.7D                                 |
| ITH1        |        | -3.592         | -5.244 | -2.539 |        | -3.207 | -5.17           | -3.658 |        |       | EN SM Down.12H.24H.7D                                 |
| ITPR1       |        | -2.012         | -1.824 | -1.931 |        | -2.46  | -2.206          | -1.14  |        |       | EN SM Down.12H.24H.7D                                 |
| KCNMB3      |        | -2.49          | -2.149 | -2.648 |        | -2.058 | -2.97           | -2.095 |        |       | EN SM Down.12H.24H.7D                                 |
| LAMC1       |        | -1.995         | -1.938 | -1.832 |        | -1.679 | -1.914          | -1.706 |        |       | EN SM Down.12H.24H.7D                                 |
| LYN7B       |        | -1.375         | -1.991 | -1.889 |        | -2.288 | -2.438          | -1.782 |        |       | EN SM Down.12H.24H.7D                                 |
| LOC478802   |        | -1.46          | -1.862 | -1.726 |        | -1.659 | -1.322          | -1.657 |        |       | EN SM Down.12H.24H.7D                                 |
| LOC481389   |        | -3.499         | -2.955 | -1.8   |        | -3.672 | -4.075          | -1.148 |        |       | EN SM Down.12H.24H.7D                                 |
| LOC482906   |        | -2.488         | -2.472 | -1.661 |        | -3.673 | -2.354          | -1.445 |        |       | EN SM Down.12H.24H.7D                                 |
| LOC482907   |        | -2.426         | -2.366 | -1.729 |        | -1.884 | -2.094          | -1.228 |        |       | EN SM Down.12H.24H.7D                                 |
| LOC488991   |        | -3.054         | -2.879 | -2.506 |        | -3.073 | -2.346          | -1.711 |        |       | EN SM Down.12H.24H.7D                                 |
| LOC607380   |        | -3.446         | -2.988 | -2.078 |        | -2.464 | -2.196          | -2.228 |        |       | EN SM Down.12H.24H.7D                                 |
| LOC607460   |        | -3.057         | -2.541 | -1.271 |        | -3.302 | -2.871          | -1.303 |        |       | EN SM Down.12H.24H.7D                                 |
| LOC609117   |        | -2.422         | -2.237 | -2.812 |        | -2.429 | -3.133          | -2.778 |        |       | EN SM Down.12H.24H.7D                                 |
| LOC611771   |        | -1.96          | -2.308 | -2.489 |        | -2.55  | -2.768          | -2.066 |        |       | EN SM Down.12H.24H.7D                                 |
| MCAM        |        | -2.488         | -2.127 | -2.358 |        | -2.735 | -1.977          | -1.756 |        |       | EN SM Down.12H.24H.7D                                 |
| ME1         |        | -2.039         | -1.836 | -1.352 |        | -2.167 | -2.034          | -1.075 |        |       | EN SM Down.12H.24H.7D                                 |
| MXI1        |        | -1.955         | -1.878 | -1.698 |        | -2.437 | -2.85           | -1.343 |        |       | EN SM Down.12H.24H.7D                                 |
| MYOM1       |        | -3.757         | -4.079 | -3.001 |        | -3.989 | -3.623          | -1.641 |        |       | EN SM Down.12H.24H.7D                                 |
| NDE1        |        | -2.556         | -2.822 | -2.338 |        | -2.611 | -2.327          | -1.391 |        |       | EN SM Down.12H.24H.7D                                 |
| NDRG2       |        | -3.176         | -2.749 | -2.743 |        | -2.94  | -2.289          | -2.323 |        |       | EN SM Down.12H.24H.7D                                 |
| NTF3        |        | -1.346         | -2.122 | -2.519 |        | -2.285 | -2.272          | -2.411 |        |       | EN SM Down.12H.24H.7D                                 |
| NTKR3       |        | -3.062         | -2.705 | -2.568 |        | -2.792 | -3.885          | -2.415 |        |       | EN SM Down.12H.24H.7D                                 |
| PCGF5       |        | -1.357         | -1.615 | -1.788 |        | -1.169 | -1.922          | -1.63  |        |       | EN SM Down.12H.24H.7D                                 |
| PDE5A       |        | -2.702         | -3.04  | -2.794 |        | -2.837 | -3.054          | -2.187 |        |       | EN SM Down.12H.24H.7D                                 |
| PGM5        |        | -2.507         | -2.506 | -1.561 |        | -2.287 | -1.908          | -1.186 |        |       | EN SM Down.12H.24H.7D                                 |
| PHYHPL      |        | -2.728         | -3.44  | -2.303 |        | -2.89  | -2.178          | -1.849 |        |       | EN SM Down.12H.24H.7D                                 |
| PKIG        |        | -3.064         | -2.572 | -1.196 |        | -2.285 | -2.231          | -1.664 |        |       | EN SM Down.12H.24H.7D                                 |
| PLN         |        | -4.399         | -3.969 | -2.628 |        | -5.214 | -3.889          | -2.078 |        |       | EN SM Down.12H.24H.7D                                 |
| PPP1R12B    |        | -3.158         | -3.106 | -2.791 |        | -3.817 | -3.925          | -2.483 |        |       | EN SM Down.12H.24H.7D                                 |
| PPP1R3C     |        | -3.211         | -2.462 | -1.397 |        | -3.624 | -2.867          | -1.307 |        |       | EN SM Down.12H.24H.7D                                 |
| PPP1R9A     |        | -2.085         | -1.706 | -1.844 |        | -2.67  | -1.591          | -1.897 |        |       | EN SM Down.12H.24H.7D                                 |
| RAB9B       |        | -2.229         | -1.664 | -1.672 |        | -2.766 | -1.746          | -1.126 |        |       | EN SM Down.12H.24H.7D                                 |
| RBPM5       |        | -1.54          | -2.66  | -1.489 |        | -1.865 | -1.487          | -1.537 |        |       | EN SM Down.12H.24H.7D                                 |
| RYR2        |        | -1.725         | -2.353 | -2.368 |        | -2.173 | -2.915          | -2.058 |        |       | EN SM Down.12H.24H.7D                                 |
| SCP2        |        | -2.521         | -2.707 | -2.946 |        | -1.844 | -2.282          | -1.57  |        |       | EN SM Down.12H.24H.7D                                 |
| SCUBE3      |        | -2.155         | -1.858 | -2.126 |        | -1.901 | -1.278          | -1.93  |        |       | EN SM Down.12H.24H.7D                                 |
| SGCG        |        | -2.337         | -2.263 | -3.066 |        | -2.827 | -2.121          | -2.854 |        |       | EN SM Down.12H.24H.7D                                 |
| SH3RF2      |        | -3.393         | -2.625 | -1.546 |        | -3.368 | -2.805          | -1.975 |        |       | EN SM Down.12H.24H.7D                                 |
| SHAE        |        | -1.652         | -2.53  | -2.004 |        | -1.989 | -1.695          | -2.174 |        |       | EN SM Down.12H.24H.7D                                 |
| SLC22A3     |        | -3.319         | -3.937 | -3.462 |        | -3.751 | -4.46           | -2.789 |        |       | EN SM Down.12H.24H.7D                                 |
| SOK5        |        | -3.321         | -2.522 | -1.977 |        | -3.155 | -2.572          | -1.161 |        |       | EN SM Down.12H.24H.7D                                 |
| SVIL        |        | -1.862         | -1.575 | -1.129 |        | -2.086 | -2.408          | -1.016 |        |       | EN SM Down.12H.24H.7D                                 |
| SYNPO2      |        | -2.924         | -3.244 | -2.334 |        | -3.08  | -2.284          | -1.883 |        |       | EN SM Down.12H.24H.7D                                 |
| TCF7L2      |        | -2.039         | -1.681 | -1.504 |        | -2.088 | -1.904          | -1.22  |        |       | EN SM Down.12H.24H.7D                                 |
| TESC        |        | -2.824         | -3.574 | -2.992 |        | -3.187 | -3.346          | -1.182 |        |       | EN SM Down.12H.24H.7D                                 |
| TIMP3       |        | -2.525         | -2.692 | -1.758 |        | -2.757 | -3.063          | -1.644 |        |       | EN SM Down.12H.24H.7D                                 |
| TMEM63C     |        | -2.203         | -2.27  | -2.12  |        | -2.425 | -1.92           | -1.965 |        |       | EN SM Down.12H.24H.7D                                 |
| VAMP2       |        | -2.061         | -1.782 | -2.473 |        | -2.016 | -1.434          | -2.429 |        |       | EN SM Down.12H.24H.7D                                 |
| ZMAT1       |        | -2.112         | -2.168 | -2.249 |        | -1.925 | -2.572          | -1.94  |        |       | EN SM Down.12H.24H.7D                                 |
| C9orf5      |        | -2.13          | -2.015 | -1.75  |        | 1.022  | -2.558          | -1.759 |        |       | EN SM Down.12H.24H.7D, SM Only Up.12H                 |
| CYP21A      |        | -1.384         | -2.017 | -2.753 |        |        | -1.431          | -4.014 |        |       | EN Only Down.12H, EN SM Down.24H.7D                   |
| EPH4L14B    |        | -3.113         | -1.976 | -2.394 |        |        | -2.259          | -1.484 |        |       | EN Only Down.12H, EN SM Down.24H.7D                   |
| SFRP4       |        | -1.747         | -3.03  | -2.654 |        |        | -2.19           | -2.235 |        |       | EN Only Down.12H, EN SM Down.24H.7D                   |
| ADRA2B      |        | -2.146         | -1.438 | -2.271 |        | -2.692 |                 | -1.86  |        |       | EN Only Down.24H, EN SM Down.12H.7D                   |
| ASB2        |        | -3.33          | -1.904 | -2.158 |        | -3.501 |                 | -2.144 |        |       | EN Only Down.24H, EN SM Down.12H.7D                   |
| ATP2A2      |        | -1.518         | -1.988 | -1.803 |        | -1.197 |                 | -1.391 |        |       | EN Only Down.24H, EN SM Down.12H.7D                   |
| CSRP1       |        | -1.832         | -1.811 | -1.445 |        | -2.139 |                 | -1.794 |        |       | EN Only Down.24H, EN SM Down.12H.7D                   |
| EFHA2       |        | -1.237         | -1.3   | -1.577 |        | -1.925 |                 | -1.41  |        |       | EN Only Down.24H, EN SM Down.12H.7D                   |
| EFHD1       |        | -2.297         | -1.59  | -1.3   |        | -2.409 |                 | -1.867 |        |       | EN Only Down.24H, EN SM Down.12H.7D                   |
| ENPP6       |        | -2.051         | -2.573 | -6.141 |        | -1.897 |                 | -4.356 |        |       | EN Only Down.24H, EN SM Down.12H.7D                   |
| FGF13       |        | -2.285         | -2.396 | -1.534 |        | -1.75  |                 | -1.144 |        |       | EN Only Down.24H, EN SM Down.12H.7D                   |
| FLNA        |        | -1.355         | -1.627 | -1.017 |        | -1.874 |                 | -1.693 |        |       | EN Only Down.24H, EN SM Down.12H.7D                   |
| FRMD5       |        | -2.653         | -1.865 | -2.465 |        | -1.697 |                 | -2.033 |        |       | EN Only Down.24H, EN SM Down.12H.7D                   |
| GOT1        |        | -1.991         | -1.48  | -1.709 |        | -2.263 |                 | -1.665 |        |       | EN Only Down.24H, EN SM Down.12H.7D                   |
| GPRC5B      |        | -1.708         | -1.633 | -2.083 |        | -1.568 |                 | -1.756 |        |       | EN Only Down.24H, EN SM Down.12H.7D                   |
| GUCY1A3     |        | -2.518         | -2.855 | -2.31  |        | -3.484 |                 | -1.434 |        |       | EN Only Down.24H, EN SM Down.12H.7D                   |
| INADL       |        | -2.633         | -1.739 | -1.91  |        | -2.147 |                 | -1.991 |        |       | EN Only Down.24H, EN SM Down.12H.7D                   |
| KILH3       |        | -3.281         | -2.63  | -1.736 |        | -3.442 |                 | -1.119 |        |       | EN Only Down.24H, EN SM Down.12H.7D                   |
| LG1         |        | -4.027         | -4.641 | -3.901 |        | -4.558 |                 | -4.238 |        |       | EN Only Down.24H, EN SM Down.12H.7D                   |
| LOC484118   |        | -1.893         | -2.339 | -1.862 |        | -1.852 |                 | -2.144 |        |       | EN Only Down.24H, EN SM Down.12H.7D                   |
| LOC490237   |        | -2.282         | -2.133 | -1.66  |        | -2.831 |                 | -1.981 |        |       | EN Only Down.24H, EN SM Down.12H.7D                   |
| MGLL        |        | -2.528         | -2.303 | -1.894 |        | -2.649 |                 | -2.158 |        |       | EN Only Down.24H, EN SM Down.12H.7D                   |
| NEXN        |        | -1.316         | -1.395 | -2.551 |        | -1.523 |                 | -1.83  |        |       | EN Only Down.24H, EN SM Down.12H.7D                   |
| PBXIP1      |        | -2.391         | -1.25  | -1.596 |        | -2.946 |                 | -2.455 |        |       | EN Only Down.24H, EN SM Down.12H.7D                   |
| PDZRN4      |        | -3.756         | -2.608 | -2.976 |        | -3.969 |                 | -2.404 |        |       | EN Only Down.24H, EN SM Down.12H.7D                   |
| PLA2G16     |        | -1.751         | -1.879 | -1.709 |        | -1.172 |                 | -1.469 |        |       | EN Only Down.24H, EN SM Down.12H.7D                   |
| PLC3        |        | -2.789         | -2.416 | -2.087 |        | -2.903 |                 | -2.173 |        |       | EN Only Down.24H, EN SM Down.12H.7D                   |
| SFRS5       |        | -1.015         | -1.073 | -1.049 |        | -1.381 |                 | -1.037 |        |       | EN Only Down.24H, EN SM Down.12H.7D                   |
| SKI         |        | -1.145         | -1.427 | -1.232 |        | -1.203 |                 | -1.596 |        |       | EN Only Down.24H, EN SM Down.12H.7D                   |
| SLMAP       |        | -1.462         | -2.025 | -2.347 |        | -2.455 |                 | -1.51  |        |       | EN Only Down.24H, EN SM Down.12H.7D                   |
| ST5         |        | -1.443         | -1.893 | -1.353 |        | -1.239 |                 | -1.536 |        |       | EN Only Down.24H, EN SM Down.12H.7D                   |
| STAR9D      |        | -1.676         | -1.336 | -1.251 |        | -1.291 |                 | -1.068 |        |       | EN Only Down.24H, EN SM Down.12H.7D                   |
| TGFBFR3     |        | -2.864         | -1.619 | -1.    |        |        |                 |        |        |       |                                                       |

|           |       |        |        |        |        |  |  |        |        |        |                                                     |
|-----------|-------|--------|--------|--------|--------|--|--|--------|--------|--------|-----------------------------------------------------|
| FXVD1     |       | -2.32  | -2.853 | -1.653 |        |  |  | -2.061 | -2.524 |        | EN.Only.Down.7D, EN.SM.Down.12H.24H                 |
| GC0M1     |       | -1.881 | -1.509 | -1.23  |        |  |  | -2.724 | -2.203 |        | EN.Only.Down.7D, EN.SM.Down.12H.24H                 |
| GS7T1     |       | -2.322 | -2.664 | -1.132 |        |  |  | -1.947 | -1.883 |        | EN.Only.Down.7D, EN.SM.Down.12H.24H                 |
| LOC612293 |       | -2.634 | -2.158 | -1.411 |        |  |  | -2.973 | -3.162 |        | EN.Only.Down.7D, EN.SM.Down.12H.24H                 |
| LOC612466 |       | -2.192 | -3.687 | -1.993 |        |  |  | -2.953 | -3.166 |        | EN.Only.Down.7D, EN.SM.Down.12H.24H                 |
| MACF3     |       | -1.151 | -1.387 | -1.259 |        |  |  | -1.441 | -2.206 |        | EN.Only.Down.7D, EN.SM.Down.12H.24H                 |
| MFAP4     |       | -2.636 | -3.24  | -2.657 |        |  |  | -2.3   | -2.455 |        | EN.Only.Down.7D, EN.SM.Down.12H.24H                 |
| NPNT      |       | -2.678 | -2.704 | -1.703 |        |  |  | -3.171 | -2.585 |        | EN.Only.Down.7D, EN.SM.Down.12H.24H                 |
| NR1D2     |       | -1.211 | -1.169 | -1.004 |        |  |  | -1.825 | -2.884 |        | EN.Only.Down.7D, EN.SM.Down.12H.24H                 |
| PDE6H     |       | -4.71  | -2.831 | -3.726 |        |  |  | -3.97  | -1.726 |        | EN.Only.Down.7D, EN.SM.Down.12H.24H                 |
| SAT2      |       | -2.63  | -2.966 | -1.452 |        |  |  | -2.797 | -3.439 |        | EN.Only.Down.7D, EN.SM.Down.12H.24H                 |
| SEPP1     |       | -5.876 | -4.029 | -2.383 |        |  |  | -3.654 | -3.067 |        | EN.Only.Down.7D, EN.SM.Down.12H.24H                 |
| SGCA      |       | -2.972 | -2.828 | -1.586 |        |  |  | -2.77  | -3.048 |        | EN.Only.Down.7D, EN.SM.Down.12H.24H                 |
| SPA17     |       | -1.751 | -1.974 | -1.355 |        |  |  | -1.721 | -1.912 |        | EN.Only.Down.7D, EN.SM.Down.12H.24H                 |
| SPARCL1   |       | -2.046 | -2.504 | -1.724 |        |  |  | -1.441 | -1.643 |        | EN.Only.Down.7D, EN.SM.Down.12H.24H                 |
| SYTL2     |       | -1.892 | -3.063 | -2.07  |        |  |  | -2.93  | -2.797 |        | EN.Only.Down.7D, EN.SM.Down.12H.24H                 |
| TSPAN7    |       | -2.408 | -3.227 | -1.58  |        |  |  | -1.514 | -2.156 |        | EN.Only.Down.7D, EN.SM.Down.12H.24H                 |
| ZNF331    |       | -2.101 | -2.11  | -1.5   |        |  |  | -1.638 | -2.192 |        | EN.Only.Down.7D, EN.SM.Down.12H.24H                 |
| CCX       |       | -4.187 | -3.801 |        |        |  |  | -4.924 | -4.804 | -2.762 | EN.SM.Down.12H.24H, SM.Only.Down.7D                 |
| CON1B     |       | -2.036 | -1.942 |        |        |  |  | -1.907 | -2.076 | -1.289 | EN.SM.Down.12H.24H, SM.Only.Down.7D                 |
| DNPK      |       | -2.061 | -2.746 |        |        |  |  | -2.355 | -2.444 | -1.099 | EN.SM.Down.12H.24H, SM.Only.Down.7D                 |
| EPB41L2   |       | -1.848 | -2.059 |        |        |  |  | -2.358 | -1.33  | -1.639 | EN.SM.Down.12H.24H, SM.Only.Down.7D                 |
| GHR       |       | -2.312 | -1.824 |        |        |  |  | -2.276 | -1.199 | -1.188 | EN.SM.Down.12H.24H, SM.Only.Down.7D                 |
| GM2A      |       | -1.76  | -2.404 |        |        |  |  | -1.421 | -2.144 | -1.543 | EN.SM.Down.12H.24H, SM.Only.Down.7D                 |
| IGFBP5    |       | -1.426 | -2.342 |        |        |  |  | -1.142 | -2.048 | -1.888 | EN.SM.Down.12H.24H, SM.Only.Down.7D                 |
| ITH3      |       | -2.209 | -2.039 |        |        |  |  | -1.855 | -1.665 | -1.449 | EN.SM.Down.12H.24H, SM.Only.Down.7D                 |
| MAMDC2    |       | -2.718 | -3.649 |        |        |  |  | -2.806 | -3.434 | -2.134 | EN.SM.Down.12H.24H, SM.Only.Down.7D                 |
| MOSPD2    |       | -1.132 | -1.865 |        |        |  |  | -2.13  | -1.646 | -1.134 | EN.SM.Down.12H.24H, SM.Only.Down.7D                 |
| PCBD1     |       | -2.33  | -2.26  |        |        |  |  | -2.038 | -1.647 | -1.564 | EN.SM.Down.12H.24H, SM.Only.Down.7D                 |
| PCMTD2    |       | -1.158 | -1.241 |        |        |  |  | -1.373 | -1.648 | -1.013 | EN.SM.Down.12H.24H, SM.Only.Down.7D                 |
| SMTN      |       | -1.42  | -2.148 |        |        |  |  | -1.358 | -1.954 | -1.553 | EN.SM.Down.12H.24H, SM.Only.Down.7D                 |
| SYNE2     |       | -3.41  | -1.914 |        |        |  |  | -3.041 | -1.704 | -1.169 | EN.SM.Down.12H.24H, SM.Only.Down.7D                 |
| TPM1      |       | -2.112 | -2.102 |        |        |  |  | -2.532 | -2.151 | -1.737 | EN.SM.Down.12H.24H, SM.Only.Down.7D                 |
| LMO3      |       | -2.611 |        | -1.268 |        |  |  | -3.334 | -2.354 | -1.301 | EN.SM.Down.12H.24H, SM.Only.Down.24H                |
| PER2      |       | -2.686 |        | -1.939 |        |  |  | -2.735 | -3.55  | -2.57  | EN.SM.Down.12H.24H, SM.Only.Down.24H                |
| TMEM59L   |       | -1.34  |        | -1.538 |        |  |  | -1.798 | -1.419 | -1.283 | EN.SM.Down.12H.24H, SM.Only.Down.24H                |
| TRPV1     |       | -1.856 |        | -1.511 |        |  |  | -2.889 | -3.25  | -1.197 | EN.SM.Down.12H.24H, SM.Only.Down.24H                |
| CEP72     |       |        | -1.813 | -1.023 |        |  |  | -1.457 | -2.068 | -1.087 | EN.SM.Down.24H.7D, SM.Only.Down.12H                 |
| COR52EB   |       |        | -1.661 | -1.006 |        |  |  | -1.709 | -1.876 | -1.694 | EN.SM.Down.24H.7D, SM.Only.Down.12H                 |
| KCNAS     |       |        | -3.437 | -3.214 |        |  |  | -2.25  | -1.993 | -2.131 | EN.SM.Down.24H.7D, SM.Only.Down.12H                 |
| KCNMA1    |       |        | -2.654 | -2.942 |        |  |  | -2.169 | -1.674 | -2.546 | EN.SM.Down.24H.7D, SM.Only.Down.12H                 |
| KLHDC8B   |       |        | -2.649 | -2.964 |        |  |  | -1.955 | -2.401 | -2.302 | EN.SM.Down.24H.7D, SM.Only.Down.12H                 |
| PDE8B     |       |        | -1.489 | -1.422 |        |  |  | -1.933 | -1.841 | -1.805 | EN.SM.Down.24H.7D, SM.Only.Down.12H                 |
| PIPSKB    |       |        | -2.624 | -2.441 |        |  |  | -1.301 | -3.377 | -1.798 | EN.SM.Down.24H.7D, SM.Only.Down.12H                 |
| SVIP      |       |        | -1.711 | -2.16  |        |  |  | -2.302 | -1.493 | -1.946 | EN.SM.Down.24H.7D, SM.Only.Down.12H                 |
| FILIP1    | 2.306 | -2.047 | -1.406 | -2.071 |        |  |  | -1.842 |        |        | EN.Only.Down.24H.7D, EN.SM.Down.12H, EN.Only.Up.2H  |
| LAMA3     |       | -2.062 | -2.971 | -1.15  |        |  |  | -2.133 |        | 1.016  | EN.Only.Down.24H.7D, EN.SM.Down.12H, SM.Only.Up.7D  |
| KDM2B     |       | -1.803 |        | 1.093  |        |  |  | -1.894 | -1.857 | -1.261 | EN.SM.Down.12H, SM.Only.Down.24H.7D, EN.Only.Up.7D  |
| SYNE1     |       | -1.812 | 1.186  |        |        |  |  | -2.388 | -2.186 | -2.436 | EN.SM.Down.12H.24H, SM.Only.Down.7D, EN.Only.Up.24H |
| ASPN      |       | -3.073 | -3.664 |        |        |  |  | -2.256 | -3.057 | 1.482  | EN.SM.Down.12H.24H, SM.Only.Up.7D                   |
| LOC607395 |       | -2.435 | -2.257 |        |        |  |  | -2.347 | -2.867 | 1.039  | EN.SM.Down.12H.24H, SM.Only.Up.7D                   |
| HPGDS     |       |        | -2.314 | -3.333 | -2.675 |  |  |        |        | -1.368 | EN.Only.Down.24H.30D, EN.SM.Down.7D                 |
| HPGD      |       |        | -2.314 | -3.333 | -2.675 |  |  |        |        | -1.898 | SM.Only.Down.7D                                     |
| ICAL      |       | -2.342 | -1.455 |        |        |  |  | -1.482 | -2.509 |        | EN.Only.Down.12H.24H                                |
| ARHGFE3   |       | -1.528 | -2.158 | -1.468 |        |  |  |        |        | -1.038 | EN.Only.Down.12H.24H, EN.SM.Down.7D                 |
| LD8       |       | -1.885 | -1.749 | -1.328 |        |  |  |        |        | -1.234 | EN.Only.Down.12H.24H, EN.SM.Down.7D                 |
| NTRK2     |       | -1.289 | -2.161 | -3.567 |        |  |  |        |        | -2.694 | EN.Only.Down.12H.24H, EN.SM.Down.7D                 |
| USP11     |       | -1.07  | -1.262 | -1.094 |        |  |  |        |        | -1.222 | EN.Only.Down.12H.24H, EN.SM.Down.7D                 |
| ANK2      |       | -2.049 | -2.285 |        |        |  |  | -2.286 |        | -1.257 | EN.Only.Down.24H, EN.SM.Down.12H, SM.Only.Down.7D   |
| ANKRD10   |       | -1.295 | -1.858 |        |        |  |  | -1.425 |        | -1.058 | EN.Only.Down.24H, EN.SM.Down.12H, SM.Only.Down.7D   |
| BICD1     |       | -1.597 | -1.904 |        |        |  |  | -2.436 |        | -1.752 | EN.Only.Down.24H, EN.SM.Down.12H, SM.Only.Down.7D   |
| FEZ1      |       | -2.402 | -2.372 |        |        |  |  | -1.996 |        | -1.696 | EN.Only.Down.24H, EN.SM.Down.12H, SM.Only.Down.7D   |
| HOXA7     |       | -3.177 | -2.273 |        |        |  |  | -1.753 |        | -1.691 | EN.Only.Down.24H, EN.SM.Down.12H, SM.Only.Down.7D   |
| INPP5A    |       | -1.341 | -1.419 |        |        |  |  | -1.485 |        | -1.01  | EN.Only.Down.24H, EN.SM.Down.12H, SM.Only.Down.7D   |
| KCN3      |       | -1.797 | -1.831 |        |        |  |  | -1.702 |        | -1.556 | EN.Only.Down.24H, EN.SM.Down.12H, SM.Only.Down.7D   |
| LOC478991 |       | -1.399 | -1.412 |        |        |  |  | -1.917 |        | -1.704 | EN.Only.Down.24H, EN.SM.Down.12H, SM.Only.Down.7D   |
| LOC607351 |       | -1.001 | -1.074 |        |        |  |  | -1.36  |        | -1.33  | EN.Only.Down.24H, EN.SM.Down.12H, SM.Only.Down.7D   |
| MOBK11A   |       | -1.729 | -1.348 |        |        |  |  | -1.492 |        | -1.194 | EN.Only.Down.24H, EN.SM.Down.12H, SM.Only.Down.7D   |
| NFA       |       | -1.93  | -1.601 |        |        |  |  | -1.733 |        | -1.012 | EN.Only.Down.24H, EN.SM.Down.12H, SM.Only.Down.7D   |
| PLCB4     |       | -2.675 | -2.163 |        |        |  |  | -3.02  |        | -1.92  | EN.Only.Down.24H, EN.SM.Down.12H, SM.Only.Down.7D   |
| SHROOM3   |       | -1.234 | -1.757 |        |        |  |  | -1.721 |        | -2.152 | EN.Only.Down.24H, EN.SM.Down.12H, SM.Only.Down.7D   |
| TAGLN     |       | -1.654 | -1.601 |        |        |  |  | -1.856 |        | -1.177 | EN.Only.Down.24H, EN.SM.Down.12H, SM.Only.Down.7D   |
| TCTEX1D2  |       | -1.861 | -1.151 |        |        |  |  | -1.448 |        | -1.304 | EN.Only.Down.24H, EN.SM.Down.12H, SM.Only.Down.7D   |
| TENC1     |       | -1.528 | -1.99  |        |        |  |  | -1.694 |        | -1.482 | EN.Only.Down.24H, EN.SM.Down.12H, SM.Only.Down.7D   |
| ZBTB4     |       | -1.422 | -1.43  |        |        |  |  | -1.131 |        | -1.233 | EN.Only.Down.24H, EN.SM.Down.12H, SM.Only.Down.7D   |
| BEI3      |       |        | -2.217 | -1.174 |        |  |  | -1.054 |        | -1.558 | EN.Only.Down.24H, EN.SM.Down.7D, SM.Only.Down.12H   |
| CNN1      |       |        | -1.146 | -1.858 |        |  |  | -1.494 |        | -2.301 | EN.Only.Down.24H, EN.SM.Down.7D, SM.Only.Down.12H   |
| DNAJB5    |       |        | -2.224 | -2.199 |        |  |  | -1.688 |        | -1.797 | EN.Only.Down.24H, EN.SM.Down.7D, SM.Only.Down.12H   |
| KCND3     |       |        | -2.449 | -2.29  |        |  |  | -1.721 |        | -2.329 | EN.Only.Down.24H, EN.SM.Down.7D, SM.Only.Down.12H   |
| LOC487765 |       |        | -3.059 | -3.108 |        |  |  | -1.931 |        | -1.856 | EN.Only.Down.24H, EN.SM.Down.7D, SM.Only.Down.12H   |
| LOC489360 |       |        | -1.734 | -1.903 |        |  |  | -1.179 |        | -1.341 | EN.Only.Down.24H, EN.SM.Down.7D, SM.Only.Down.12H   |
| PTGDS     |       |        | -1.548 | -1.606 |        |  |  | -1.21  |        | -1.649 | EN.Only.Down.24H, EN.SM.Down.7D, SM.Only.Down.12H   |
| PXDNL     |       |        | -2.078 | -1.746 |        |  |  | -1.775 |        | -1.339 | EN.Only.Down.24H, EN.SM.Down.7D, SM.Only.Down.12H   |
| ROHR      |       |        | -2.331 | -2.324 |        |  |  | -1.951 |        | -1.501 | EN.Only.Down.24H, EN.SM.Down.7D, SM.Only.Down.12H   |
| SLC3A1    |       |        | -2.642 | -1.925 |        |  |  | -2.117 |        | -1.934 | EN.Only.Down.24H, EN.SM.Down.7D, SM.Only.Down.12H   |
| SLIT2     |       |        | -1.738 | -2.206 |        |  |  | -1.254 |        | -1.564 | EN.Only.Down.24H, EN.SM.Down.7D, SM.Only.Down.12H   |
| ABIZ      |       | -1.289 | -1.361 | -1.004 |        |  |  | -1.266 |        |        | EN.Only.Down.24H.7D, EN.SM.Down.12H                 |
| ABLIM1    |       | -2.372 | -2.582 | -1.486 |        |  |  | -2.369 |        |        | EN.Only.Down.24H.7D, EN.SM.Down.12H                 |
| BHMT      |       | -2.467 | -2.677 | -2.482 |        |  |  | -2.266 |        |        | EN.Only.Down.24H.7D, EN.SM.Down.12H                 |
| CLYBL     |       | -1.799 | -2.486 | -1.465 |        |  |  | -2.171 |        |        | EN.Only.Down.24H.7D, EN.SM.Down.12H                 |
| CPE       |       | -1.447 | -1.998 | -2.167 |        |  |  | -1.61  |        |        | EN.Only.Down.24H.7D, EN.SM.Down.12H                 |
| EDNRB     |       | -1.841 | -1.811 | -1.69  |        |  |  | -1.728 |        |        | EN.Only.Down.24H.7D, EN.SM.Down.12H                 |
| FMO3      |       | -3.834 | -3.276 | -2.159 |        |  |  | -2.26  |        |        | EN.Only.Down.24H.7D, EN.SM.Down.12H                 |
| FMO5      |       | -1.959 | -1.95  | -1.868 |        |  |  | -1.303 |        |        | EN.Only.Down.24H.7D, EN.SM.Down.12H                 |
| GUCY1B3   |       | -2.147 | -2.278 | -1.456 |        |  |  | -2.525 |        |        | EN.Only.Down.24H.7D, EN.SM.Down.12H                 |
| LOC608636 |       | -2.391 | -2.513 | -1.357 |        |  |  | -1.028 |        |        | EN.Only.Down.24H.7D, EN.SM.Down.12H                 |
| MAOB      |       | -2.729 | -2.547 | -1.209 |        |  |  | -2.09  |        |        | EN.Only.Down.24H.7D, EN.SM.Down.12H                 |
| MEOX2     |       | -2.004 | -2.026 | -1.213 |        |  |  | -1.954 |        |        | EN.Only.Down.24H.7D, EN.SM.Down.12H                 |
| MYH11     |       | -1.749 | -2.267 | -1.886 |        |  |  | -1.965 |        |        | EN.Only.Down.24H.7D, EN.SM.Down.12H                 |
| MYO7B     |       | -1.027 | -1.332 | -1.106 |        |  |  | -1.25  |        |        | EN.Only.Down.24H.7D, EN.SM.Down.12H                 |
| NK01      |       | -1.002 | -1.069 | -1.232 |        |  |  | -1.862 |        |        | EN.Only.Down.24H.7D, EN.SM.Down.12H                 |
| OLFM11    |       | -3.673 | -2.635 | -1.604 |        |  |  | -3.856 |        |        | EN.Only.Down.24H.7D, EN.SM.Down.12H                 |
| PALMD     |       | -3.563 | -2.686 | -1.685 |        |  |  | -2.076 |        |        | EN.Only.Down.24H.7D, EN.SM.Down.12H                 |
| PCDH7     |       | -1.809 | -2.124 | -1.291 |        |  |  | -2.081 |        |        | EN.Only.Down.24H.7D, EN.SM.Down.12H                 |
| PGCP      |       | -2.342 | -2.708 | -1.86  |        |  |  | -2.028 |        |        | EN.Only.Down.24H.7D, EN.SM.Down.12H                 |
| PRELP     |       | -1.904 | -2.932 | -2.397 |        |  |  | -1.984 |        |        | EN.Only.Down.24H.7D, EN.SM.Down.12H                 |
| RAB4A     |       | -1.462 | -1.057 | -1.143 |        |  |  | -1.531 |        |        | EN.Only.Down.24H.7D, EN.SM.Down.12H                 |
| RBM33     |       | -1.891 | -1.542 | -1.734 |        |  |  | -1.62  |        |        | EN.Only.Down.24H.7D, EN.SM.Down.12H                 |
| TCEAL1    |       | -1.332 | -1.518 | -1.095 |        |  |  | -1.647 |        |        | EN.Only.Down.24H.7D, EN.SM.Down.12H                 |
| VPS13B    |       | -1.454 | -1.603 | -1.358 |        |  |  | -1.675 |        |        | EN.Only.Down.24H.7D, EN.SM.Down.12H                 |
| CISD1     | -1.33 | -1.341 |        | -1.001 |        |  |  | -1.89  |        |        | EN.Only.Down.2H.7D, EN.SM.Down.12H                  |
| MEF2C     |       | -1.985 |        | -1.05  |        |  |  | -2.742 | -2.032 |        | EN.Only.Down.7D, EN.SM.Down.12H, SM.Only.Down.24H   |
| PFIFBP2   |       | -1.473 |        | -1.505 |        |  |  | -2.357 | -2.743 |        | EN.Only.Down.7D, EN.SM.Down.12H, SM.Only.Down.24H   |
| SCUBE2    |       | -2.614 |        | -1.524 |        |  |  | -2.188 | -2.46  |        | EN.Only.Down.7D, EN.SM.Down.12H, SM.Only.Down.24H   |
| SGIP1     |       | -1.974 |        | -2.051 |        |  |  | -1.843 | -2.6   |        | EN.Only.Down.7D, EN.SM.Down.12H, SM.Only.Down.24H   |
| SH3D19    |       | -2.1   |        | -1.048 |        |  |  | -2.289 | -1.538 |        | EN.Only.Down.7D, EN.SM.Down.12H, SM.Only.Down.24H   |
| TCTN2     |       | -2.378 |        | -1.642 |        |  |  | -2.598 | -1.559 |        | EN.Only.Down.7D, EN.SM.Down.12H, SM.Only.Down.24H   |
| RGN       |       |        | -1.238 | -2.107 |        |  |  | -3.448 | -2.4   |        |                                                     |

|           |        |        |        |        |  |  |        |        |        |       |                                                               |
|-----------|--------|--------|--------|--------|--|--|--------|--------|--------|-------|---------------------------------------------------------------|
| PPARGC1A  | -2.454 |        |        |        |  |  | -2.487 | -3.001 | -2.424 |       | EN.SM.Down.12H,SM.Only.Down.24H.7D                            |
| RPS6KA5   | -1.641 |        |        |        |  |  | -3.207 | -2.838 | -1.38  |       | EN.SM.Down.12H,SM.Only.Down.24H.7D                            |
| A2M       | -1.881 | -1.911 |        |        |  |  | -1.858 | -2.302 |        |       | EN.SM.Down.12H.24H                                            |
| AGRN      | -1.651 | -1.729 |        |        |  |  | -1.881 | -1.602 |        |       | EN.SM.Down.12H.24H                                            |
| AIG1      | -2.321 | -1.785 |        |        |  |  | -2.848 | -2.259 |        |       | EN.SM.Down.12H.24H                                            |
| AKR1C1L2  | -3.777 | -2.264 |        |        |  |  | -3.807 | -3.242 |        |       | EN.SM.Down.12H.24H                                            |
| ART4      | -2.291 | -2.549 |        |        |  |  | -2.341 | -1.917 |        |       | EN.SM.Down.12H.24H                                            |
| CABC1     | -2.914 | -2.439 |        |        |  |  | -1.868 | -2.429 |        |       | EN.SM.Down.12H.24H                                            |
| CFI       | -2.353 | -2.804 |        |        |  |  | -1.881 | -2.103 |        |       | EN.SM.Down.12H.24H                                            |
| CHMP4C    | -2.525 | -2.272 |        |        |  |  | -3.251 | -1.72  |        |       | EN.SM.Down.12H.24H                                            |
| CTSF      | -1.818 | -1.684 |        |        |  |  | -1.459 | -1.375 |        |       | EN.SM.Down.12H.24H                                            |
| DDX26B    | -1.363 | -2.046 |        |        |  |  | -2.222 | -2.445 |        |       | EN.SM.Down.12H.24H                                            |
| DUT       | -1.407 | -1.469 |        |        |  |  | -2.136 | -1.683 |        |       | EN.SM.Down.12H.24H                                            |
| ENPP5     | -1.103 | -1.235 |        |        |  |  | -1.6   | -1.606 |        |       | EN.SM.Down.12H.24H                                            |
| FAHD2A    | -2.188 | -1.223 |        |        |  |  | -2.221 | -1.766 |        |       | EN.SM.Down.12H.24H                                            |
| FBXL20    | -1.064 | -1.085 |        |        |  |  | -1.29  | -1.937 |        |       | EN.SM.Down.12H.24H                                            |
| GLRB      | -3.2   | -2.093 |        |        |  |  | -2.902 | -2.375 |        |       | EN.SM.Down.12H.24H                                            |
| GOLIM4    | -2.05  | -1.857 |        |        |  |  | -2.208 | -1.957 |        |       | EN.SM.Down.12H.24H                                            |
| GSTA4     | -1.956 | -1.908 |        |        |  |  | -2.024 | -1.658 |        |       | EN.SM.Down.12H.24H                                            |
| HEHL      | -1.938 | -1.551 |        |        |  |  | -1.319 | -2.02  |        |       | EN.SM.Down.12H.24H                                            |
| MSD17B8   | -1.607 | -1.298 |        |        |  |  | -1.382 | -1.501 |        |       | EN.SM.Down.12H.24H                                            |
| ITSN1     | -1.836 | -2.018 |        |        |  |  | -2.004 | -2.646 |        |       | EN.SM.Down.12H.24H                                            |
| JAM2      | -3.709 | -2.71  |        |        |  |  | -1.738 | -1.393 |        |       | EN.SM.Down.12H.24H                                            |
| KLHL38    | -3.544 | -3.559 |        |        |  |  | -3.982 | -3.975 |        |       | EN.SM.Down.12H.24H                                            |
| LOC475615 | -3.868 | -2.713 |        |        |  |  | -3.351 | -3.11  |        |       | EN.SM.Down.12H.24H                                            |
| LOC476167 | -1.844 | -1.292 |        |        |  |  | -1.968 | -1.504 |        |       | EN.SM.Down.12H.24H                                            |
| LOC476578 | -1.615 | -1.365 |        |        |  |  | -1.655 | -1.535 |        |       | EN.SM.Down.12H.24H                                            |
| LOC479827 | -1.549 | -1.761 |        |        |  |  | -1.521 | -1.254 |        |       | EN.SM.Down.12H.24H                                            |
| LOC487557 | -2.152 | -1.92  |        |        |  |  | -2.132 | -3.059 |        |       | EN.SM.Down.12H.24H                                            |
| LOC607874 | -1.663 | -1.26  |        |        |  |  | -1.578 | -1.22  |        |       | EN.SM.Down.12H.24H                                            |
| LOC609239 | -1.574 | -1.662 |        |        |  |  | -1.114 | -1.711 |        |       | EN.SM.Down.12H.24H                                            |
| LOC611318 | -3.011 | -2.076 |        |        |  |  | -2.533 | -2.703 |        |       | EN.SM.Down.12H.24H                                            |
| LOC611359 | -2.386 | -2.547 |        |        |  |  | -2.603 | -2.116 |        |       | EN.SM.Down.12H.24H                                            |
| LRIG3     | -2.205 | -2.343 |        |        |  |  | -2.028 | -1.9   |        |       | EN.SM.Down.12H.24H                                            |
| MATN2     | -2.344 | -2.535 |        |        |  |  | -1.68  | -1.879 |        |       | EN.SM.Down.12H.24H                                            |
| MBNL1     | -1.309 | -1.211 |        |        |  |  | -1.839 | -1.262 |        |       | EN.SM.Down.12H.24H                                            |
| NET1      | -2.636 | -2.082 |        |        |  |  | -3.216 | -2.594 |        |       | EN.SM.Down.12H.24H                                            |
| P2RX1     | -1.679 | -2.249 |        |        |  |  | -1.947 | -1.56  |        |       | EN.SM.Down.12H.24H                                            |
| PBX1      | -2.409 | -2.27  |        |        |  |  | -2.045 | -1.709 |        |       | EN.SM.Down.12H.24H                                            |
| PDCD4     | -2.296 | -1.814 |        |        |  |  | -1.806 | -1.5   |        |       | EN.SM.Down.12H.24H                                            |
| PHKG1     | -1.416 | -1.336 |        |        |  |  | -1.777 | -1.498 |        |       | EN.SM.Down.12H.24H                                            |
| PLSCR4    | -2.221 | -1.289 |        |        |  |  | -2.351 | -1.976 |        |       | EN.SM.Down.12H.24H                                            |
| RLB2      | -1.793 | -1.264 |        |        |  |  | -1.604 | -1.85  |        |       | EN.SM.Down.12H.24H                                            |
| RCAN2     | -1.791 | -1.863 |        |        |  |  | -2.707 | -2.202 |        |       | EN.SM.Down.12H.24H                                            |
| SLC44A2   | -1.941 | -1.647 |        |        |  |  | -1.548 | -1.412 |        |       | EN.SM.Down.12H.24H                                            |
| SMARCA2   | -1.823 | -1.926 |        |        |  |  | -2.051 | -1.746 |        |       | EN.SM.Down.12H.24H                                            |
| SPINK2    | -3.209 | -2.073 |        |        |  |  | -2.661 | -3.019 |        |       | EN.SM.Down.12H.24H                                            |
| TACC1     | -1.581 | -1.313 |        |        |  |  | -1.627 | -1.368 |        |       | EN.SM.Down.12H.24H                                            |
| TCP1L1L2  | -1.938 | -1.877 |        |        |  |  | -1.753 | -2.192 |        |       | EN.SM.Down.12H.24H                                            |
| THBS3     | -1.516 | -1.859 |        |        |  |  | -1.645 | -1.746 |        |       | EN.SM.Down.12H.24H                                            |
| TSC22D1   | -2.419 | -1.641 |        |        |  |  | -3.312 | -2.064 |        |       | EN.SM.Down.12H.24H                                            |
| AKIN2     | -1.727 |        | -1.746 |        |  |  | -2.128 |        | -1.373 |       | EN.SM.Down.12H.7D                                             |
| CABP1     | -1.617 |        | -2.851 |        |  |  | -1.546 |        | -2.041 |       | EN.SM.Down.12H.7D                                             |
| CHKA      | -1.441 |        | -1.175 |        |  |  | -1.596 |        | -1.302 |       | EN.SM.Down.12H.7D                                             |
| DLG3      | -1.325 |        | -1.896 |        |  |  | -2.954 |        | -1.429 |       | EN.SM.Down.12H.7D                                             |
| HOKA5     | -2.952 |        | -1.983 |        |  |  | -1.801 |        | -1.333 |       | EN.SM.Down.12H.7D                                             |
| LIMS2     | -2.126 |        | -1.104 |        |  |  | -2.172 |        | -2.167 |       | EN.SM.Down.12H.7D                                             |
| LOC486761 | -1.033 |        | -1.396 |        |  |  | -1.194 |        | -1.412 |       | EN.SM.Down.12H.7D                                             |
| LOC487009 | -1.385 |        | -1.237 |        |  |  | -1.328 |        | -1.231 |       | EN.SM.Down.12H.7D                                             |
| MPP7      | -2.503 |        | -1.869 |        |  |  | -2.556 |        | -1.137 |       | EN.SM.Down.12H.7D                                             |
| MTSSL     | -1.707 |        | -1.785 |        |  |  | -1.775 |        | -1.467 |       | EN.SM.Down.12H.7D                                             |
| PPP1R12A  | -1.355 |        | -1.336 |        |  |  | -1.66  |        | -1.802 |       | EN.SM.Down.12H.7D                                             |
| RALGAP52  | -1.827 |        | -3.057 |        |  |  | -1.625 |        | -1.265 |       | EN.SM.Down.12H.7D                                             |
| SLC38A4   | -1.464 |        | -1.637 |        |  |  | -1.125 |        | -1.588 |       | EN.SM.Down.12H.7D                                             |
| SMARCD3   | -1.585 |        | -1.271 |        |  |  | -2.047 |        | -1.237 |       | EN.SM.Down.12H.7D                                             |
| TLE1      | -1.205 |        | -1.246 |        |  |  | -1.596 |        | -1.052 |       | EN.SM.Down.12H.7D                                             |
| CHD6      |        | -1.02  |        |        |  |  | -1.687 | -2.018 | -1.347 |       | EN.SM.Down.24H,SM.Only.Down.12H.7D                            |
| GATM      |        | -2.557 |        |        |  |  | -2.228 | -2.344 | -1.059 |       | EN.SM.Down.24H,SM.Only.Down.12H.7D                            |
| ARHGAP10  |        |        | -1.725 |        |  |  | -2.166 | -2.176 | -1.531 |       | EN.SM.Down.7D,SM.Only.Down.12H.24H                            |
| CST9L     |        |        | -1.925 |        |  |  | -3.215 | -2.65  | -3.359 |       | EN.SM.Down.7D,SM.Only.Down.12H.24H                            |
| DGKG      |        |        | -2.484 |        |  |  | -1.651 | -1.485 | -1.928 |       | EN.SM.Down.7D,SM.Only.Down.12H.24H                            |
| STOX2     |        |        | -1.056 |        |  |  | -1.242 | -1.985 | -1.303 |       | EN.SM.Down.7D,SM.Only.Down.12H.24H                            |
| COL3A1    | -3.181 | -3.224 | 1.09   | 2.778  |  |  | -3.304 |        | 1.26   |       | EN.Only.Down.24H,EN.SM.Up.7D,EN.SM.Down.12H,EN.Only.Up.30D    |
| ATP1B3    | -1.917 | -1.839 | 1.738  |        |  |  | 1.633  | -2.81  | 1.13   |       | EN.SM.Up.7D,EN.SM.Down.12H.24H,SM.Only.Down.7D,SM.Only.Up.12H |
| SVEP1     | -1.528 |        |        | 2.644  |  |  | -2.493 | -2.056 |        | 1.975 | EN.SM.Up.30D,EN.SM.Down.12H,SM.Only.Down.24H                  |
| NTS       | -2.213 | -2.983 | -2.339 |        |  |  | 3.443  | 3.438  | 1.464  |       | EN.Only.Down.12H.24H.7D,SM.Only.Up.12H.24H                    |
| CTSK      | -2.094 | -1.936 | 1.605  |        |  |  | -2.515 |        |        |       | EN.Only.Down.24H,EN.SM.Up.7D,EN.SM.Down.12H                   |
| LOC610234 | -1.079 |        |        | 3.313  |  |  | -2.459 | -1.835 |        |       | EN.SM.Down.12H,SM.Only.Down.24H,EN.Only.Up.30D                |
| MXRA8     | -3.304 | -3.124 | 1.444  |        |  |  | -3.133 |        |        |       | EN.Only.Down.24H,EN.SM.Down.12H,EN.Only.Up.7D                 |
| FAP       | -2.007 | -2.265 |        |        |  |  | -1.333 |        | 1.323  |       | EN.Only.Down.24H,EN.SM.Down.12H,SM.Only.Up.7D                 |
| LOC488984 | -2.012 | -1.981 |        |        |  |  | -1.855 |        | 1.651  |       | EN.Only.Down.24H,EN.SM.Down.12H,SM.Only.Up.7D                 |
| LOC609688 | -2.142 | -2.164 |        |        |  |  | -2.612 |        | 1.044  |       | EN.Only.Down.24H,EN.SM.Down.12H,SM.Only.Up.7D                 |
| PRSS35    | -2.876 | -2.777 |        |        |  |  | -3.058 |        | 1.735  |       | EN.Only.Down.24H,EN.SM.Down.12H,SM.Only.Up.7D                 |
| SESN3     | -2.433 | -2.325 |        |        |  |  | -1.898 |        | 1.355  |       | EN.Only.Down.24H,EN.SM.Down.12H,SM.Only.Up.7D                 |
| SLC17A5   | -1.952 | -1.219 |        |        |  |  | -2.221 |        | 1.735  |       | EN.Only.Down.24H,EN.SM.Down.12H,SM.Only.Up.7D                 |
| TNFSF10   | -3.05  | -2.03  |        |        |  |  | -1.495 |        | 1.221  |       | EN.Only.Down.24H,EN.SM.Down.12H,SM.Only.Up.7D                 |
| DAMM1     | 1.36   | -1.846 | -1.523 |        |  |  |        |        | -1.246 |       | EN.Only.Down.24H,EN.SM.Down.7D,EN.Only.Up.2H                  |
| ZAR1L     | -1.518 |        |        |        |  |  | -1.467 | -3.61  | 1.298  |       | EN.SM.Down.12H,SM.Only.Down.24H,SM.Only.Up.7D                 |
| SLC27A3   |        | -1.635 | 1.061  |        |  |  | -1.058 | -1.908 |        |       | EN.SM.Down.24H,SM.Only.Down.12H,EN.Only.Up.7D                 |
| BCL2      | 1.491  | -1.47  |        |        |  |  | -1.072 |        | -1.667 |       | EN.SM.Down.7D,SM.Only.Down.12H,EN.Only.Up.2H                  |
| HAND2     | -4.805 |        |        | -2.227 |  |  | -6.734 |        | -1.766 |       | EN.Only.Down.30D,EN.SM.Down.12H                               |
| FAH       | -1.688 |        |        |        |  |  | -2.221 |        | -1.721 |       | EN.Only.Down.12H                                              |
| PXYD6     | -2.033 | -1.335 |        |        |  |  |        |        | -1.923 |       | EN.Only.Down.12H,EN.SM.Down.24H                               |
| ITGA11    | -2.877 | -3.285 |        |        |  |  |        |        | -2.875 |       | EN.Only.Down.12H,EN.SM.Down.24H                               |
| EMX2      | -1.357 |        | -1.755 |        |  |  |        |        | -1.344 |       | EN.Only.Down.12H,EN.SM.Down.7D                                |
| LOC490316 | -1.069 |        | -1.049 |        |  |  |        |        | -1.212 |       | EN.Only.Down.12H,EN.SM.Down.7D                                |
| PTBP2     | -1.286 |        | -1.94  |        |  |  |        |        | -1.694 |       | EN.Only.Down.12H,EN.SM.Down.7D                                |
| THRB      | -1.31  |        | -1.464 |        |  |  |        |        | -1.049 |       | EN.Only.Down.12H,EN.SM.Down.7D                                |
| GABARAPL1 | -1.182 | -1.423 |        |        |  |  |        |        | -1.194 |       | EN.Only.Down.12H.24H,SM.Only.Down.7D                          |
| LRIG1     | -2.011 | -2.374 |        |        |  |  |        |        | -1.128 |       | EN.Only.Down.12H.24H,SM.Only.Down.7D                          |
| RABGAP1L  | -1.066 | -1.051 |        |        |  |  |        |        | -1.033 |       | EN.Only.Down.12H.24H,SM.Only.Down.7D                          |
| EPCAM     | -2.974 | -2.891 | -3.243 |        |  |  |        |        |        |       | EN.Only.Down.12H.24H.7D                                       |
| LOC487291 | -2.135 | -2.152 | -1.092 |        |  |  |        |        |        |       | EN.Only.Down.12H.24H.7D                                       |
| MYRIP     | -2.157 | -2.461 | -2.451 |        |  |  |        |        |        |       | EN.Only.Down.12H.24H.7D                                       |
| NIPAL1    | -2.159 | -2.539 | -1.335 |        |  |  |        |        |        |       | EN.Only.Down.12H.24H.7D                                       |
| PKP4      | -1.068 | -1.588 | -1.173 |        |  |  |        |        |        |       | EN.Only.Down.12H.24H.7D                                       |
| RDH16     | -6.273 | -4.6   | -2.374 |        |  |  |        |        |        |       | EN.Only.Down.12H.24H.7D                                       |
| FBXL2     |        | -1.207 |        |        |  |  | -1.29  | -1.937 |        |       | EN.Only.Down.24H                                              |
|           |        | -2.462 |        |        |  |  | -1.986 |        |        |       | EN.Only.Down.24H,EN.SM.Down.12H                               |
| AMT       | -1.301 | -1.334 |        |        |  |  | -1.368 |        |        |       | EN.Only.Down.24H,EN.SM.Down.12H                               |
| ANKRD50   | -1.266 | -1.871 |        |        |  |  | -1.19  |        |        |       | EN.Only.Down.24H,EN.SM.Down.12H                               |
| ANXA4     | -1.926 | -1.639 |        |        |  |  | -1.182 |        |        |       | EN.Only.Down.24H,EN.SM.Down.12H                               |
| APLP2     | -1.202 | -1.537 |        |        |  |  | -1.145 |        |        |       | EN.Only.Down.24H,EN.SM.Down.12H                               |
| ATG13     | -1.861 | -1.426 |        |        |  |  | -1.238 |        |        |       | EN.Only.Down.24H,EN.SM.Down.12H                               |
| BACE1     | -1.56  | -1.167 |        |        |  |  | -1.194 |        |        |       | EN.Only.Down.24H,EN.SM.Down.12H                               |
| BBS2      | -1.98  | -1.378 |        |        |  |  | -1.509 |        |        |       | EN.Only.Down.24H,EN.SM.Down.12H                               |
| BCAM      | -2.033 | -1.798 |        |        |  |  | -1.75  |        |        |       | EN.Only.Down.24H,EN.SM.Down.12H                               |
| BMP4      | -3.468 | -2.007 |        |        |  |  | -1.176 |        |        |       | EN.Only.Down.24H,EN.SM.Down.12H                               |
| CALCOCCO2 | -1.921 | -1.151 |        |        |  |  | -1.583 |        |        |       | EN.Only.Down.24H,EN.SM.Down.12H                               |
| CCDC28A   | -1.819 | -1.535 |        |        |  |  | -1.669 |        |        |       | EN.Only.Down.24H,EN.SM.Down.12H                               |
| CNDDBP1   | -1.542 | -1.619 |        |        |  |  | -1.38  |        |        |       | EN.Only.Down.24H,EN.SM.Down.12H                               |
| CLIP3     | -1.479 | -1.286 |        |        |  |  | -1.452 |        |        |       | EN.Only.Down.24H,EN.SM.Down.12H                               |
| CLSTN1    | -1.849 | -1.532 |        |        |  |  | -2.024 |        |        |       | EN.Only.Down.24H,EN.SM.Down.12H                               |

|           |        |        |        |  |  |  |        |                                        |
|-----------|--------|--------|--------|--|--|--|--------|----------------------------------------|
| CPXM2     | -1.732 | -2.525 |        |  |  |  |        | EN.Only.Down.24H, EN.SM.Down.12H       |
| DECR1     | -2.017 | -1.245 |        |  |  |  |        | EN.Only.Down.24H, EN.SM.Down.12H       |
| DHRS4     | -1.979 | -1.39  |        |  |  |  |        | EN.Only.Down.24H, EN.SM.Down.12H       |
| DINDC1    | -1.15  | -1.459 |        |  |  |  |        | EN.Only.Down.24H, EN.SM.Down.12H       |
| DNGDN     | -3.347 | -1.552 |        |  |  |  |        | EN.Only.Down.24H, EN.SM.Down.12H       |
| DNAL11    | -2.116 | -1.322 |        |  |  |  |        | EN.Only.Down.24H, EN.SM.Down.12H       |
| EBPL      | -1.672 | -1.169 |        |  |  |  |        | EN.Only.Down.24H, EN.SM.Down.12H       |
| EFEMP2    | -1.474 | -1.315 |        |  |  |  |        | EN.Only.Down.24H, EN.SM.Down.12H       |
| EPHX1     | -1.822 | -1.558 |        |  |  |  |        | EN.Only.Down.24H, EN.SM.Down.12H       |
| EPHX2     | -3.11  | -2.428 |        |  |  |  |        | EN.Only.Down.24H, EN.SM.Down.12H       |
| FBLUM1    | -1.619 | -1.123 |        |  |  |  |        | EN.Only.Down.24H, EN.SM.Down.12H       |
| FBK032    | -3.672 | -1.96  |        |  |  |  |        | EN.Only.Down.24H, EN.SM.Down.12H       |
| FHL5      | -3.433 | -4.233 |        |  |  |  |        | EN.Only.Down.24H, EN.SM.Down.12H       |
| FYCO1     | -1.843 | -1.661 |        |  |  |  |        | EN.Only.Down.24H, EN.SM.Down.12H       |
| GAS6      | -1.912 | -2.204 |        |  |  |  |        | EN.Only.Down.24H, EN.SM.Down.12H       |
| GJA8      | -2.102 | -2.844 |        |  |  |  |        | EN.Only.Down.24H, EN.SM.Down.12H       |
| GLT8D2    | -2.341 | -2.031 |        |  |  |  |        | EN.Only.Down.24H, EN.SM.Down.12H       |
| GNG11     | -2.332 | -1.786 |        |  |  |  |        | EN.Only.Down.24H, EN.SM.Down.12H       |
| GSTM4     | -1.285 | -1.522 |        |  |  |  |        | EN.Only.Down.24H, EN.SM.Down.12H       |
| GTFC2     | -1.349 | -1.182 |        |  |  |  |        | EN.Only.Down.24H, EN.SM.Down.12H       |
| HIBADH    | -1.303 | -1.207 |        |  |  |  |        | EN.Only.Down.24H, EN.SM.Down.12H       |
| HMGN3     | -2.03  | -1.282 |        |  |  |  |        | EN.Only.Down.24H, EN.SM.Down.12H       |
| ICK       | -1.901 | -1.815 |        |  |  |  |        | EN.Only.Down.24H, EN.SM.Down.12H       |
| IFT172    | -2.046 | -1.408 |        |  |  |  |        | EN.Only.Down.24H, EN.SM.Down.12H       |
| JAG1      | -1.514 | -1.522 |        |  |  |  |        | EN.Only.Down.24H, EN.SM.Down.12H       |
| KCNMB1    | -1.289 | -1.741 |        |  |  |  |        | EN.Only.Down.24H, EN.SM.Down.12H       |
| KDEL2     | -1.486 | -1.026 |        |  |  |  |        | EN.Only.Down.24H, EN.SM.Down.12H       |
| LDCL1     | -2.078 | -1.406 |        |  |  |  |        | EN.Only.Down.24H, EN.SM.Down.12H       |
| LHPF      | -1.732 | -1.376 |        |  |  |  |        | EN.Only.Down.24H, EN.SM.Down.12H       |
| LOC474709 | -1.644 | -1.188 |        |  |  |  |        | EN.Only.Down.24H, EN.SM.Down.12H       |
| LOC480441 | -1.835 | -1.211 |        |  |  |  |        | EN.Only.Down.24H, EN.SM.Down.12H       |
| LOC480657 | -1.876 | -1.192 |        |  |  |  |        | EN.Only.Down.24H, EN.SM.Down.12H       |
| LOC483247 | -1.22  | -1.689 |        |  |  |  |        | EN.Only.Down.24H, EN.SM.Down.12H       |
| LOC489163 | -2.184 | -1.533 |        |  |  |  |        | EN.Only.Down.24H, EN.SM.Down.12H       |
| LOC490959 | -2.055 | -1.423 |        |  |  |  |        | EN.Only.Down.24H, EN.SM.Down.12H       |
| LOC610479 | -1.784 | -1.133 |        |  |  |  |        | EN.Only.Down.24H, EN.SM.Down.12H       |
| LOC611366 | -2.182 | -1.159 |        |  |  |  |        | EN.Only.Down.24H, EN.SM.Down.12H       |
| LOC611894 | -1.836 | -1.457 |        |  |  |  |        | EN.Only.Down.24H, EN.SM.Down.12H       |
| LOC612614 | -2.545 | -2.033 |        |  |  |  |        | EN.Only.Down.24H, EN.SM.Down.12H       |
| LRBA      | -1.726 | -1.342 |        |  |  |  |        | EN.Only.Down.24H, EN.SM.Down.12H       |
| LZTFL1    | -1.835 | -1.551 |        |  |  |  |        | EN.Only.Down.24H, EN.SM.Down.12H       |
| MAP1LC3B  | -1.475 | -1.452 |        |  |  |  |        | EN.Only.Down.24H, EN.SM.Down.12H       |
| MLLT3     | -1.663 | -1.277 |        |  |  |  |        | EN.Only.Down.24H, EN.SM.Down.12H       |
| MTMR15    | -1.87  | -2.285 |        |  |  |  |        | EN.Only.Down.24H, EN.SM.Down.12H       |
| NAT14     | -1.5   | -1.197 |        |  |  |  |        | EN.Only.Down.24H, EN.SM.Down.12H       |
| NEK7      | -1.191 | -1.163 |        |  |  |  |        | EN.Only.Down.24H, EN.SM.Down.12H       |
| NFIX      | -1.749 | -1.849 |        |  |  |  |        | EN.Only.Down.24H, EN.SM.Down.12H       |
| NICN1     | -1.433 | -1.281 |        |  |  |  |        | EN.Only.Down.24H, EN.SM.Down.12H       |
| NOTCH3    | -1.16  | -1.333 |        |  |  |  |        | EN.Only.Down.24H, EN.SM.Down.12H       |
| NR2F1     | -2.536 | -1.938 |        |  |  |  |        | EN.Only.Down.24H, EN.SM.Down.12H       |
| NR2F2     | -1.502 | -1.29  |        |  |  |  |        | EN.Only.Down.24H, EN.SM.Down.12H       |
| NRPF      | -1.587 | -1.567 |        |  |  |  |        | EN.Only.Down.24H, EN.SM.Down.12H       |
| NUCB2     | -1.698 | -1.002 |        |  |  |  |        | EN.Only.Down.24H, EN.SM.Down.12H       |
| OGN       | -2.75  | -2.852 |        |  |  |  |        | EN.Only.Down.24H, EN.SM.Down.12H       |
| PAK3      | -1.176 | -2.192 |        |  |  |  |        | EN.Only.Down.24H, EN.SM.Down.12H       |
| PAM       | -1.703 | -1.899 |        |  |  |  |        | EN.Only.Down.24H, EN.SM.Down.12H       |
| PDGFC     | -1.755 | -3.654 |        |  |  |  |        | EN.Only.Down.24H, EN.SM.Down.12H       |
| PDGFR1    | -2.362 | -1.573 |        |  |  |  |        | EN.Only.Down.24H, EN.SM.Down.12H       |
| PHACTR3   | -1.283 | -1.176 |        |  |  |  |        | EN.Only.Down.24H, EN.SM.Down.12H       |
| PPAP2A    | -1.531 | -1.862 |        |  |  |  |        | EN.Only.Down.24H, EN.SM.Down.12H       |
| PRUNE2    | -3.134 | -1.811 |        |  |  |  |        | EN.Only.Down.24H, EN.SM.Down.12H       |
| RARB      | -2.397 | -1.812 |        |  |  |  |        | EN.Only.Down.24H, EN.SM.Down.12H       |
| RARRES2   | -1.663 | -2.065 |        |  |  |  |        | EN.Only.Down.24H, EN.SM.Down.12H       |
| RECK      | -1.613 | -1.838 |        |  |  |  |        | EN.Only.Down.24H, EN.SM.Down.12H       |
| REEP3     | -1.167 | -1.115 |        |  |  |  |        | EN.Only.Down.24H, EN.SM.Down.12H       |
| RNASE4    | -2.949 | -2.402 |        |  |  |  |        | EN.Only.Down.24H, EN.SM.Down.12H       |
| RRAGB     | -2.08  | -1.815 |        |  |  |  |        | EN.Only.Down.24H, EN.SM.Down.12H       |
| RUNX1T1   | -2.363 | -1.785 |        |  |  |  |        | EN.Only.Down.24H, EN.SM.Down.12H       |
| RXP1      | -2.333 | -1.882 |        |  |  |  |        | EN.Only.Down.24H, EN.SM.Down.12H       |
| SELENBP1  | -1.715 | -1.692 |        |  |  |  |        | EN.Only.Down.24H, EN.SM.Down.12H       |
| SH3BGR1   | -1.979 | -2.171 |        |  |  |  |        | EN.Only.Down.24H, EN.SM.Down.12H       |
| SLC25A27  | -2.929 | -1.761 |        |  |  |  |        | EN.Only.Down.24H, EN.SM.Down.12H       |
| SNCG      | -2.279 | -1.923 |        |  |  |  |        | EN.Only.Down.24H, EN.SM.Down.12H       |
| SNED1     | -2.71  | -1.709 |        |  |  |  |        | EN.Only.Down.24H, EN.SM.Down.12H       |
| SORBS3    | -1.158 | -1.066 |        |  |  |  |        | EN.Only.Down.24H, EN.SM.Down.12H       |
| SPC21     | -2.371 | -1.38  |        |  |  |  |        | EN.Only.Down.24H, EN.SM.Down.12H       |
| SPTAN1    | -1.18  | -1.2   |        |  |  |  |        | EN.Only.Down.24H, EN.SM.Down.12H       |
| SSBP2     | -2.498 | -1.298 |        |  |  |  |        | EN.Only.Down.24H, EN.SM.Down.12H       |
| SSH3      | -1.427 | -1.15  |        |  |  |  |        | EN.Only.Down.24H, EN.SM.Down.12H       |
| STOM      | -1.725 | -1.887 |        |  |  |  |        | EN.Only.Down.24H, EN.SM.Down.12H       |
| THR       | -1.226 | -1.232 |        |  |  |  |        | EN.Only.Down.24H, EN.SM.Down.12H       |
| TIMP2     | -1.234 | -1.139 |        |  |  |  |        | EN.Only.Down.24H, EN.SM.Down.12H       |
| TMEM47    | -1.774 | -1.469 |        |  |  |  |        | EN.Only.Down.24H, EN.SM.Down.12H       |
| TMEM59    | -1.383 | -1.142 |        |  |  |  |        | EN.Only.Down.24H, EN.SM.Down.12H       |
| TMTCC1    | -1.865 | -1.245 |        |  |  |  |        | EN.Only.Down.24H, EN.SM.Down.12H       |
| TMTCA     | -2.852 | -2.085 |        |  |  |  |        | EN.Only.Down.24H, EN.SM.Down.12H       |
| TNIK      | -1.885 | -1.291 |        |  |  |  |        | EN.Only.Down.24H, EN.SM.Down.12H       |
| TRIM63    | -2.863 | -1.446 |        |  |  |  |        | EN.Only.Down.24H, EN.SM.Down.12H       |
| UBE2H     | -1.012 | -1.609 |        |  |  |  |        | EN.Only.Down.24H, EN.SM.Down.12H       |
| UBE2Q2    | -1.722 | -1.571 |        |  |  |  |        | EN.Only.Down.24H, EN.SM.Down.12H       |
| USP53     | -1.389 | -1.71  |        |  |  |  |        | EN.Only.Down.24H, EN.SM.Down.12H       |
| VIDL1     | -3.488 | -2.772 |        |  |  |  |        | EN.Only.Down.24H, EN.SM.Down.12H       |
| WDR90     | -3.112 | -1.942 |        |  |  |  |        | EN.Only.Down.24H, EN.SM.Down.12H       |
| XPA       | -1.438 | -1.355 |        |  |  |  |        | EN.Only.Down.24H, EN.SM.Down.12H       |
| YPEL1     | -2.808 | -2.868 |        |  |  |  |        | EN.Only.Down.24H, EN.SM.Down.12H       |
| ZMAT4     | -2.016 | -2.087 |        |  |  |  |        | EN.Only.Down.24H, EN.SM.Down.12H       |
| ZNF532    | -1.587 | -1.472 |        |  |  |  |        | EN.Only.Down.24H, EN.SM.Down.12H       |
| ZNF704    | -1.988 | -1.283 |        |  |  |  |        | EN.Only.Down.24H, EN.SM.Down.12H       |
| ARHGEF15  |        | -1.329 | -1.737 |  |  |  |        | EN.Only.Down.24H, EN.SM.Down.7D        |
| EPAS1     |        | -1.032 | -1.123 |  |  |  | -1.413 | EN.Only.Down.24H, EN.SM.Down.7D        |
| LOC606881 |        | -1.308 | -1.638 |  |  |  | -1.412 | EN.Only.Down.24H, EN.SM.Down.7D        |
| LOC611604 |        | -2.045 | -1.178 |  |  |  | -1.196 | EN.Only.Down.24H, EN.SM.Down.7D        |
| PMVK      |        | -1.453 | -1.148 |  |  |  | -1.39  | EN.Only.Down.24H, EN.SM.Down.7D        |
| DDAH2     |        | -1.02  |        |  |  |  | -1.649 | EN.Only.Down.24H, SM.Only.Down.12H, 7D |
| PDLIM7    |        | -1.239 |        |  |  |  | -1.356 | EN.Only.Down.24H, SM.Only.Down.12H, 7D |
| ADCY5     |        | -1.359 | -1.188 |  |  |  | -2.687 | EN.Only.Down.24H, 7D, SM.Only.Down.12H |
| BAG2      |        | -1.298 | -1.147 |  |  |  | -1.058 | EN.Only.Down.24H, 7D, SM.Only.Down.12H |
| CEP63     |        | -1.839 | -1.53  |  |  |  | -1.702 | EN.Only.Down.24H, 7D, SM.Only.Down.12H |
| ELF3      |        | -2.61  | -1.449 |  |  |  | -1.651 | EN.Only.Down.24H, 7D, SM.Only.Down.12H |
| HEPH11    |        | -3.299 | -1.591 |  |  |  | -1.228 | EN.Only.Down.24H, 7D, SM.Only.Down.12H |
| LOC480041 |        | -1.216 | -1.245 |  |  |  | -1.071 | EN.Only.Down.24H, 7D, SM.Only.Down.12H |
| LOC486484 |        | -1.95  | -1.187 |  |  |  | -1.427 | EN.Only.Down.24H, 7D, SM.Only.Down.12H |
| LOC609616 |        | -2.019 | -1.817 |  |  |  | -1.261 | EN.Only.Down.24H, 7D, SM.Only.Down.12H |
| LOC611878 |        | -1.901 | -2.384 |  |  |  | -1.455 | EN.Only.Down.24H, 7D, SM.Only.Down.12H |
| SMOC2     |        | -1.384 | -2.551 |  |  |  | -1.407 | EN.Only.Down.24H, 7D, SM.Only.Down.12H |
| ZNANB1    |        | -1.422 | -1.167 |  |  |  | -1.451 | EN.Only.Down.24H, 7D, SM.Only.Down.12H |
| BRCA2     | -1.792 | -1.819 |        |  |  |  | -2.003 | EN.Only.Down.2H, EN.SM.Down.12H        |
| LOC610949 | -1.409 | -1.884 |        |  |  |  | -1.532 | EN.Only.Down.2H, EN.SM.Down.12H        |
| RSPH3     | -1.717 | -1.27  |        |  |  |  | -1.796 | EN.Only.Down.2H, EN.SM.Down.12H        |
| SLC25A12  | -1.821 | -1.636 |        |  |  |  | -1.898 | EN.Only.Down.2H, EN.SM.Down.12H        |
| LOC482778 | -1.802 | -1.865 |        |  |  |  | -1.519 | EN.Only.Down.2H, SM.Only.Down.12H, 24H |
| BMP1R1A   | -1.712 |        | -1.279 |  |  |  | -1.595 | EN.Only.Down.7D, EN.SM.Down.12H        |
| BVES      | -1.804 |        | -1.766 |  |  |  | -2.656 | EN.Only.Down.7D, EN.SM.Down.12H        |

|           |        |        |        |        |        |        |                                       |
|-----------|--------|--------|--------|--------|--------|--------|---------------------------------------|
| CAB39L    | -1.595 | -1.518 |        | -2.187 |        |        | EN.Only.Down.7D, EN.SM.Down.12H       |
| CCDC30    | -2.916 | -1.229 |        | -1.158 |        |        | EN.Only.Down.7D, EN.SM.Down.12H       |
| DUSP23    | -1.971 | -1.106 |        | -1.722 |        |        | EN.Only.Down.7D, EN.SM.Down.12H       |
| KBTBD3    | -1.724 | -1.006 |        | -1.71  |        |        | EN.Only.Down.7D, EN.SM.Down.12H       |
| KLHDC1    | -1.172 | -1.708 |        | -1.27  |        |        | EN.Only.Down.7D, EN.SM.Down.12H       |
| KLHDC6    | -2.488 | -1.132 |        | -2.359 |        |        | EN.Only.Down.7D, EN.SM.Down.12H       |
| KLHL13    | -1.745 | -1.545 |        | -1.515 |        |        | EN.Only.Down.7D, EN.SM.Down.12H       |
| LOC480082 | -1.114 | -1.155 |        | -1.044 |        |        | EN.Only.Down.7D, EN.SM.Down.12H       |
| LOC484162 | -1.368 | -1.096 |        | -1.615 |        |        | EN.Only.Down.7D, EN.SM.Down.12H       |
| LOC484542 | -1.677 | -1.362 |        | -1.907 |        |        | EN.Only.Down.7D, EN.SM.Down.12H       |
| MDGA1     | -2.297 | -2.628 |        | -1.812 |        |        | EN.Only.Down.7D, EN.SM.Down.12H       |
| NEO1      | -1.667 | -1.34  |        | -1.197 |        |        | EN.Only.Down.7D, EN.SM.Down.12H       |
| PEG3      | -1.654 | -1.127 |        | -1.937 |        |        | EN.Only.Down.7D, EN.SM.Down.12H       |
| PLP1      | -1.829 | -2.192 |        | -1.833 |        |        | EN.Only.Down.7D, EN.SM.Down.12H       |
| PPP4R4    | -1.645 | -1.404 |        | -1.285 |        |        | EN.Only.Down.7D, EN.SM.Down.12H       |
| RASGRF2   | -2.234 | -2.573 |        | -1.069 |        |        | EN.Only.Down.7D, EN.SM.Down.12H       |
| RORA      | -1.529 | -1.21  |        | -1.705 |        |        | EN.Only.Down.7D, EN.SM.Down.12H       |
| SLC26A7   | -1.342 | -1.604 |        | -1.255 |        |        | EN.Only.Down.7D, EN.SM.Down.12H       |
| SLC7A2    | -2.246 | -2.006 |        | -3.1   |        |        | EN.Only.Down.7D, EN.SM.Down.12H       |
| SRMS      | -1.235 | -1.081 |        | -1.026 |        |        | EN.Only.Down.7D, EN.SM.Down.12H       |
| TMEM55A   | -2.676 | -1.646 |        | -2.961 |        |        | EN.Only.Down.7D, EN.SM.Down.12H       |
| TSPAN12   | -1.509 | -1.242 |        | -1.623 |        |        | EN.Only.Down.7D, EN.SM.Down.12H       |
| TUBB2B    | -2.03  | -1.776 |        | -1.325 |        |        | EN.Only.Down.7D, EN.SM.Down.12H       |
| ESR1      |        | -1.129 |        | -1.517 | -1.83  |        | EN.Only.Down.7D, SM.Only.Down.12H,24H |
| GPRC5C    |        | -1.833 |        | -1.397 | -1.695 |        | EN.Only.Down.7D, SM.Only.Down.12H,24H |
| KLHL23    |        | -1.517 |        | -2.028 | -1.81  |        | EN.Only.Down.7D, SM.Only.Down.12H,24H |
| PLG       |        | -1.047 |        | -1.423 | -2.372 |        | EN.Only.Down.7D, SM.Only.Down.12H,24H |
| VSIG2     |        | -1.967 |        | -1.976 | -2.6   |        | EN.Only.Down.7D, SM.Only.Down.12H,24H |
| AKAP5     | -2.141 |        |        | -1.687 | -1.617 |        | EN.Only.Down.7D, EN.SM.Down.12H       |
| ASPA      | -1.689 |        |        | -1.793 | -3.262 |        | EN.SM.Down.12H, SM.Only.Down.24H      |
| BDH2      | -3.15  |        |        | -3.799 | -1.96  |        | EN.SM.Down.12H, SM.Only.Down.24H      |
| CCNG2     | -2.186 |        |        | -2.745 | -2.22  |        | EN.SM.Down.12H, SM.Only.Down.24H      |
| FABP2     | -1.627 |        |        | -1.779 | -2.327 |        | EN.SM.Down.12H, SM.Only.Down.24H      |
| FBXO21    | -1.141 |        |        | -1.378 | -1.693 |        | EN.SM.Down.12H, SM.Only.Down.24H      |
| FGFY      | -1.607 |        |        | -1.256 | -2.288 |        | EN.SM.Down.12H, SM.Only.Down.24H      |
| FHIT      | -2.582 |        |        | -2.081 | -3.05  |        | EN.SM.Down.12H, SM.Only.Down.24H      |
| GAB1      | -1.945 |        |        | -2.384 | -1.333 |        | EN.SM.Down.12H, SM.Only.Down.24H      |
| GPLD1     | -1.914 |        |        | -1.336 | -1.916 |        | EN.SM.Down.12H, SM.Only.Down.24H      |
| IFFO1     | -1.381 |        |        | -1.312 | -2.236 |        | EN.SM.Down.12H, SM.Only.Down.24H      |
| LOC484150 | -1.169 |        |        | -1.542 | -1.666 |        | EN.SM.Down.12H, SM.Only.Down.24H      |
| LOC608881 | -3.724 |        |        | -3.33  | -3.024 |        | EN.SM.Down.12H, SM.Only.Down.24H      |
| LOC610426 | -2.325 |        |        | -1.266 | -1.273 |        | EN.SM.Down.12H, SM.Only.Down.24H      |
| LOC610871 | -1.994 |        |        | -2.347 | -1.896 |        | EN.SM.Down.12H, SM.Only.Down.24H      |
| LOC611882 | -1.439 |        |        | -1.685 | -1.528 |        | EN.SM.Down.12H, SM.Only.Down.24H      |
| LRRCL16A  | -2.135 |        |        | -2.759 | -1.819 |        | EN.SM.Down.12H, SM.Only.Down.24H      |
| MDP1      | -1.543 |        |        | -1.142 | -1.721 |        | EN.SM.Down.12H, SM.Only.Down.24H      |
| NCEH1     | -1.527 |        |        | -1.809 | -1.559 |        | EN.SM.Down.12H, SM.Only.Down.24H      |
| NEIL2     | -3.292 |        |        | -2.842 | -1.928 |        | EN.SM.Down.12H, SM.Only.Down.24H      |
| NLGN1     | -2.135 |        |        | -3.443 | -2.024 |        | EN.SM.Down.12H, SM.Only.Down.24H      |
| NSMCE1    | -1.577 |        |        | -1.342 | -2.176 |        | EN.SM.Down.12H, SM.Only.Down.24H      |
| PLTP      | -1.517 |        |        | -1.267 | -1.724 |        | EN.SM.Down.12H, SM.Only.Down.24H      |
| SGCD      | -1.48  |        |        | -2.458 | -1.527 |        | EN.SM.Down.12H, SM.Only.Down.24H      |
| SUTRK6    | -3.191 |        |        | -4.32  | -3.04  |        | EN.SM.Down.12H, SM.Only.Down.24H      |
| SULT1A1   | -2.351 |        |        | -2.656 | -2.485 |        | EN.SM.Down.12H, SM.Only.Down.24H      |
| TCEA3     | -1.944 |        |        | -2.051 | -1.628 |        | EN.SM.Down.12H, SM.Only.Down.24H      |
| TET1      | -2.366 |        |        | -2.369 | -1.837 |        | EN.SM.Down.12H, SM.Only.Down.24H      |
| WDR19     | -1.879 |        |        | -1.466 | -1.472 |        | EN.SM.Down.12H, SM.Only.Down.24H      |
| WDR60     | -1.501 |        |        | -1.697 | -1.519 |        | EN.SM.Down.12H, SM.Only.Down.24H      |
| ZEB2      | -1.529 |        |        | -1.428 | -1.333 |        | EN.SM.Down.12H, SM.Only.Down.24H      |
| ZNF518    | -1.275 |        |        | -1.781 | -1.467 |        | EN.SM.Down.12H, SM.Only.Down.24H      |
| ZNF699    | -1.193 |        |        | -1.198 | -1.666 |        | EN.SM.Down.12H, SM.Only.Down.24H      |
| ARHGAP6   | -1.404 |        |        | -1.978 |        | -1.333 | EN.SM.Down.12H, SM.Only.Down.7D       |
| ARHGAP17  | -1.138 |        |        | -1.507 |        | -1.045 | EN.SM.Down.12H, SM.Only.Down.7D       |
| CA11      | -1.411 |        |        | -1.233 |        | -1.091 | EN.SM.Down.12H, SM.Only.Down.7D       |
| CDH19     | -3.396 |        |        | -1.807 |        | -2.462 | EN.SM.Down.12H, SM.Only.Down.7D       |
| CDKL5     | -1.416 |        |        | -2.227 |        | -1.174 | EN.SM.Down.12H, SM.Only.Down.7D       |
| CHD3      | -1.067 |        |        | -1.252 |        | -1.119 | EN.SM.Down.12H, SM.Only.Down.7D       |
| CHRNA1    | -3.233 |        |        | -3.255 |        | -1.504 | EN.SM.Down.12H, SM.Only.Down.7D       |
| CUGBP2    | -1.082 |        |        | -1.913 |        | -1.572 | EN.SM.Down.12H, SM.Only.Down.7D       |
| DOCK6     | -1.507 |        |        | -1.21  |        | -1.272 | EN.SM.Down.12H, SM.Only.Down.7D       |
| F2RL2     | -3.357 |        |        | -2.245 |        | -1.581 | EN.SM.Down.12H, SM.Only.Down.7D       |
| FMO4      | -1.257 |        |        | -1.077 |        | -2.786 | EN.SM.Down.12H, SM.Only.Down.7D       |
| GNAI1     | -1.24  |        |        | -1.644 |        | -1.357 | EN.SM.Down.12H, SM.Only.Down.7D       |
| KLKB1     | -1.965 |        |        | -1.592 |        | -1.194 | EN.SM.Down.12H, SM.Only.Down.7D       |
| LOC486544 | -1.686 |        |        | -2.075 |        | -2.037 | EN.SM.Down.12H, SM.Only.Down.7D       |
| LOC609596 | -1.934 |        |        | -1.346 |        | -3.986 | EN.SM.Down.12H, SM.Only.Down.7D       |
| LOC611494 | -2.628 |        |        | -2.145 |        | -1.407 | EN.SM.Down.12H, SM.Only.Down.7D       |
| LOC611848 | -2.026 |        |        | -2.152 |        | -1.77  | EN.SM.Down.12H, SM.Only.Down.7D       |
| NDRG3     | -1.243 |        |        | -1.567 |        | -1.211 | EN.SM.Down.12H, SM.Only.Down.7D       |
| NEK11     | -1.773 |        |        | -1.768 |        | -1.261 | EN.SM.Down.12H, SM.Only.Down.7D       |
| PDK2      | -1.466 |        |        | -1.074 |        | -1.173 | EN.SM.Down.12H, SM.Only.Down.7D       |
| PIGP      | -1.461 |        |        | -1.243 |        | -1.388 | EN.SM.Down.12H, SM.Only.Down.7D       |
| RAB11B    | -1.223 |        |        | -1.124 |        | -1.269 | EN.SM.Down.12H, SM.Only.Down.7D       |
| RENG      | -2.163 |        |        | -2.766 |        | -1.046 | EN.SM.Down.12H, SM.Only.Down.7D       |
| SHOX2     | -1.641 |        |        | -1.196 |        | -1.643 | EN.SM.Down.12H, SM.Only.Down.7D       |
| SLC22A17  | -1.6   |        |        | -1.047 |        | -1.011 | EN.SM.Down.12H, SM.Only.Down.7D       |
| SLC25A36  | -1.519 |        |        | -1.117 |        | -1.039 | EN.SM.Down.12H, SM.Only.Down.7D       |
| SSBP3     | -1.146 |        |        | -1.582 |        | -1.107 | EN.SM.Down.12H, SM.Only.Down.7D       |
| TBK15     | -1.619 |        |        | -1.715 |        | -1.087 | EN.SM.Down.12H, SM.Only.Down.7D       |
| TSPAN2    | -2.463 |        |        | -1.026 |        | -1.401 | EN.SM.Down.12H, SM.Only.Down.7D       |
| TTC33     | -1.085 |        |        | -1.55  |        | -1.391 | EN.SM.Down.12H, SM.Only.Down.7D       |
| ZCCHC24   | -1.746 |        |        | -1.399 |        | -1.271 | EN.SM.Down.12H, SM.Only.Down.7D       |
| ZNF185    | -1.906 |        |        | -2.029 |        | -1.381 | EN.SM.Down.12H, SM.Only.Down.7D       |
| ANTXR1    |        | -2.197 |        | -1.413 |        | -1.553 | EN.SM.Down.24H, SM.Only.Down.12H      |
| ATP1B2    |        | -2.607 |        | -1.594 |        | -2.775 | EN.SM.Down.24H, SM.Only.Down.12H      |
| CIQTNF1   |        | -1.81  |        | -1.364 |        | -2.022 | EN.SM.Down.24H, SM.Only.Down.12H      |
| GATA6     |        | -1.764 |        | -1.071 |        | -1.914 | EN.SM.Down.24H, SM.Only.Down.12H      |
| LGALS8    |        | -1.059 |        | -1.341 |        | -2.082 | EN.SM.Down.24H, SM.Only.Down.12H      |
| LOC475083 |        | -2.555 |        | -2.052 |        | -2.375 | EN.SM.Down.24H, SM.Only.Down.12H      |
| PCDH20    |        | -1.839 |        | -3.529 |        | -2.744 | EN.SM.Down.24H, SM.Only.Down.12H      |
| PRK15     |        | -3.279 |        | -1.551 |        | -2.254 | EN.SM.Down.24H, SM.Only.Down.12H      |
| ZEB1      |        | -1.295 |        | -1.329 |        | -1.467 | EN.SM.Down.24H, SM.Only.Down.12H      |
| C7        |        | -1.326 |        |        |        | -2.829 | -3.04                                 |
| ENTPD1    |        | -1.146 |        |        |        | -1.922 | -1.184                                |
| LYRM1     |        | -1.251 |        |        |        | -1.852 | -1.017                                |
| IERSL     | -2.351 |        |        | -2.78  |        | -1.419 | EN.SM.Down.24H, SM.Only.Down.12H      |
| CACNB2    |        |        | -1.795 | -1.633 |        | -1.871 | EN.SM.Down.7D, SM.Only.Down.12H       |
| CCDC158   |        |        | -1.542 | -1.443 |        | -1.334 | EN.SM.Down.7D, SM.Only.Down.12H       |
| DPF2      |        |        | -1.295 | -1     |        | -1.247 | EN.SM.Down.7D, SM.Only.Down.12H       |
| EMIL5     |        |        | -1.178 | -1.153 |        | -1.103 | EN.SM.Down.7D, SM.Only.Down.12H       |
| EXTL3     |        |        | -1.119 | -1.783 |        | -1.319 | EN.SM.Down.7D, SM.Only.Down.12H       |
| LOC474650 |        |        | -1.216 | -2.143 |        | -1.627 | EN.SM.Down.7D, SM.Only.Down.12H       |
| LOC481669 |        |        | -1.035 | -1.283 |        | -1.237 | EN.SM.Down.7D, SM.Only.Down.12H       |
| RIMKB     |        |        | -1.785 | -1.564 |        | -1.168 | EN.SM.Down.7D, SM.Only.Down.12H       |
| SLC25A40  |        |        | -1.129 | -1.231 |        | -1.219 | EN.SM.Down.7D, SM.Only.Down.12H       |
| SOSTDC1   |        |        | -1.163 | -1.617 |        | -1.198 | EN.SM.Down.7D, SM.Only.Down.12H       |
| SYW1      |        |        | -1.261 | -1.332 |        | -1.566 | EN.SM.Down.7D, SM.Only.Down.12H       |
| ARCA9     |        |        |        | -2.653 |        | -2.064 | SM.Only.Down.12H,24H,7D               |
| ALDH1A1   |        |        |        | -4.549 |        | -4.103 | -5.003                                |
| ARHGAP29  |        |        |        | -1.337 |        | -2.09  | -1.393                                |
| LOC611967 |        |        |        | -1.671 |        | -3.234 | -1.629                                |
| LOC612888 |        |        |        | -1.331 |        | -1.625 | -1.094                                |
| NRXN1     |        |        |        | -2.485 |        | -4.03  | -1.94                                 |



|           |        |        |        |        |  |        |        |  |                                    |
|-----------|--------|--------|--------|--------|--|--------|--------|--|------------------------------------|
| HECA      |        |        | -1.119 |        |  | -1.144 |        |  | EN.Only.Down.24H, SM.Only.Down.12H |
| HIP1      |        |        | -1.028 |        |  | -1.821 |        |  | EN.Only.Down.24H, SM.Only.Down.12H |
| ITGA1     |        |        | -1.219 |        |  | -1.109 |        |  | EN.Only.Down.24H, SM.Only.Down.12H |
| ITGB5     |        |        | -1.511 |        |  | -2.311 |        |  | EN.Only.Down.24H, SM.Only.Down.12H |
| KLHL3     |        |        | -1.635 |        |  | -1.06  |        |  | EN.Only.Down.24H, SM.Only.Down.12H |
| LOC475575 |        |        | -1.037 |        |  | -1.015 |        |  | EN.Only.Down.24H, SM.Only.Down.12H |
| LOC479268 |        |        | -1.175 |        |  | -1.098 |        |  | EN.Only.Down.24H, SM.Only.Down.12H |
| LOC484338 |        |        | -1.852 |        |  | -1.027 |        |  | EN.Only.Down.24H, SM.Only.Down.12H |
| LOC490390 |        |        | -1.904 |        |  | -1.176 |        |  | EN.Only.Down.24H, SM.Only.Down.12H |
| LOC607729 |        |        | -2.058 |        |  | -1.121 |        |  | EN.Only.Down.24H, SM.Only.Down.12H |
| LOC608135 |        |        | -1.219 |        |  | -1.651 |        |  | EN.Only.Down.24H, SM.Only.Down.12H |
| LOC608883 |        |        | -1.932 |        |  | -1.301 |        |  | EN.Only.Down.24H, SM.Only.Down.12H |
| MFGE8     |        |        | -1.023 |        |  | -1.082 |        |  | EN.Only.Down.24H, SM.Only.Down.12H |
| MYL6B     |        |        | -1.281 |        |  | -1.41  |        |  | EN.Only.Down.24H, SM.Only.Down.12H |
| NDRG4     |        |        | -1.404 |        |  | -1.361 |        |  | EN.Only.Down.24H, SM.Only.Down.12H |
| PDGFD     |        |        | -1.876 |        |  | -1.929 |        |  | EN.Only.Down.24H, SM.Only.Down.12H |
| PHTF2     |        |        | -1.462 |        |  | -1.783 |        |  | EN.Only.Down.24H, SM.Only.Down.12H |
| PIK3IP1   |        |        | -2.744 |        |  | -1.545 |        |  | EN.Only.Down.24H, SM.Only.Down.12H |
| PLEKHG5   |        |        | -1.49  |        |  | -1.672 |        |  | EN.Only.Down.24H, SM.Only.Down.12H |
| RELL1     |        |        | -1.116 |        |  | -1.35  |        |  | EN.Only.Down.24H, SM.Only.Down.12H |
| RGAG4     |        |        | -1.308 |        |  | -1.315 |        |  | EN.Only.Down.24H, SM.Only.Down.12H |
| SMAD3     |        |        | -1.157 |        |  | -1.048 |        |  | EN.Only.Down.24H, SM.Only.Down.12H |
| TCEAL3    |        |        | -1.536 |        |  | -1.67  |        |  | EN.Only.Down.24H, SM.Only.Down.12H |
| THNSL2    |        |        | -2.283 |        |  | -1.21  |        |  | EN.Only.Down.24H, SM.Only.Down.12H |
| TPCN1     |        |        | -1.629 |        |  | -1.857 |        |  | EN.Only.Down.24H, SM.Only.Down.12H |
| ZDHHC2    |        |        | -1.707 |        |  | -1.388 |        |  | EN.Only.Down.24H, SM.Only.Down.12H |
| ZNF30     |        |        | -1.802 |        |  | -1.378 |        |  | EN.Only.Down.24H, SM.Only.Down.12H |
| CIRBP     |        |        | -1.905 |        |  |        | -1.455 |  | EN.Only.Down.24H, SM.Only.Down.7D  |
| EZH1      |        |        | -1.665 |        |  |        | -1.781 |  | EN.Only.Down.24H, SM.Only.Down.7D  |
| SORCS3    |        |        | -1.351 |        |  |        | -1.318 |  | EN.Only.Down.24H, SM.Only.Down.7D  |
| TTC19     |        |        | -1.576 |        |  |        | -1.711 |  | EN.Only.Down.24H, SM.Only.Down.7D  |
| ALDH1A2   |        |        | -2.678 | -3.303 |  |        |        |  | EN.Only.Down.24H.7D                |
| CACNA1C   |        |        | -1.239 | -1.095 |  |        |        |  | EN.Only.Down.24H.7D                |
| CDH6      |        |        | -2.478 | -2.23  |  |        |        |  | EN.Only.Down.24H.7D                |
| MTMR6     |        |        | -1.083 | -1.19  |  |        |        |  | EN.Only.Down.24H.7D                |
| CALHM2    | -2.763 |        |        |        |  | -2.083 |        |  | EN.Only.Down.2H, SM.Only.Down.12H  |
| DHR37     | -2.235 |        |        |        |  | -1.054 |        |  | EN.Only.Down.2H, SM.Only.Down.12H  |
| GSPT2     | -1.253 |        |        |        |  | -1.877 |        |  | EN.Only.Down.2H, SM.Only.Down.12H  |
| SETMAR    | -2.06  |        |        |        |  | -1.188 |        |  | EN.Only.Down.2H, SM.Only.Down.12H  |
| SLC22A16  | -3.188 |        |        |        |  | -1.354 |        |  | EN.Only.Down.2H, SM.Only.Down.12H  |
| ZNF606    | -1.658 |        |        |        |  | -1.33  |        |  | EN.Only.Down.2H, SM.Only.Down.12H  |
| ZNF845    | -2.346 |        |        |        |  | -1.326 |        |  | EN.Only.Down.2H, SM.Only.Down.12H  |
| HISPPD1   | -2.205 | -1.206 |        |        |  |        |        |  | EN.Only.Down.2H.12H                |
| NASP      | -1.426 | -1.076 |        |        |  |        |        |  | EN.Only.Down.2H.12H                |
| RGSL2     | -2.332 | -2.621 |        |        |  |        |        |  | EN.Only.Down.2H.12H                |
| LOC477172 | -1.491 |        |        | -1.472 |  |        |        |  | EN.Only.Down.2H.7D                 |
| FBXO3     |        |        |        | -1.033 |  | -3.298 |        |  | EN.Only.Down.7D                    |
| BCAS3     |        |        |        | -1.378 |  | -1.509 |        |  | EN.Only.Down.7D, SM.Only.Down.12H  |
| CAMK2G    |        |        |        | -1.172 |  | -1.594 |        |  | EN.Only.Down.7D, SM.Only.Down.12H  |
| CRISPLD1  |        |        |        | -2.023 |  | -1.715 |        |  | EN.Only.Down.7D, SM.Only.Down.12H  |
| ESRRG     |        |        |        | -1.587 |  | -1.505 |        |  | EN.Only.Down.7D, SM.Only.Down.12H  |
| EXTL1     |        |        |        | -1.455 |  | -1.614 |        |  | EN.Only.Down.7D, SM.Only.Down.12H  |
| GGG1      |        |        |        | -1.224 |  | -1.687 |        |  | EN.Only.Down.7D, SM.Only.Down.12H  |
| HSPB8     |        |        |        | -1.019 |  | -1.209 |        |  | EN.Only.Down.7D, SM.Only.Down.12H  |
| IGLON5    |        |        |        | -1.053 |  | -1.379 |        |  | EN.Only.Down.7D, SM.Only.Down.12H  |
| LOC476778 |        |        |        | -1.203 |  | -1.079 |        |  | EN.Only.Down.7D, SM.Only.Down.12H  |
| LOC477528 |        |        |        | -1.29  |  | -1.063 |        |  | EN.Only.Down.7D, SM.Only.Down.12H  |
| LOC610770 |        |        |        | -1.35  |  | -1.081 |        |  | EN.Only.Down.7D, SM.Only.Down.12H  |
| MSH2      |        |        |        | -1.365 |  | -1.835 |        |  | EN.Only.Down.7D, SM.Only.Down.12H  |
| NRN1      |        |        |        | -3.51  |  | -1.388 |        |  | EN.Only.Down.7D, SM.Only.Down.12H  |
| PARD3B    |        |        |        | -1.144 |  | -1.124 |        |  | EN.Only.Down.7D, SM.Only.Down.12H  |
| PCSK7     |        |        |        | -1.545 |  | -1.628 |        |  | EN.Only.Down.7D, SM.Only.Down.12H  |
| PLCL1     |        |        |        | -1.573 |  | -1.598 |        |  | EN.Only.Down.7D, SM.Only.Down.12H  |
| PRR12     |        |        |        | -1.05  |  | -1.313 |        |  | EN.Only.Down.7D, SM.Only.Down.12H  |
| RASL11A   |        |        |        | -1.489 |  | -1.659 |        |  | EN.Only.Down.7D, SM.Only.Down.12H  |
| RET       |        |        |        | -1.092 |  | -1.344 |        |  | EN.Only.Down.7D, SM.Only.Down.12H  |
| SH3BGRL2  |        |        |        | -1.242 |  | -1.018 |        |  | EN.Only.Down.7D, SM.Only.Down.12H  |
| SYDE2     |        |        |        | -2.232 |  | -1.021 |        |  | EN.Only.Down.7D, SM.Only.Down.12H  |
| TOM1L1    |        |        |        | -1.519 |  | -1.519 |        |  | EN.Only.Down.7D, SM.Only.Down.12H  |
| KK        |        |        |        | -1.335 |  | -2.538 |        |  | EN.Only.Down.7D, SM.Only.Down.12H  |
| ZNF662    |        |        |        | -2.064 |  | -1.264 |        |  | EN.Only.Down.7D, SM.Only.Down.12H  |
| ZYG11A    |        |        |        | -1.606 |  | -1.374 |        |  | EN.Only.Down.7D, SM.Only.Down.12H  |
| RPRG      |        |        |        | -1.162 |  |        | -1.762 |  | EN.Only.Down.7D, SM.Only.Down.24H  |
| ST7L      |        |        |        | -1.207 |  |        | -1.403 |  | EN.Only.Down.7D, SM.Only.Down.24H  |
| 4-Sep     |        |        | -1.695 |        |  | -1.663 |        |  | EN.SM.Down.12H                     |
| ACAA1     |        |        | -1.596 |        |  | -1.24  |        |  | EN.SM.Down.12H                     |
| ACT1      |        |        | -1.53  |        |  | -2.128 |        |  | EN.SM.Down.12H                     |
| ACTA2     |        |        | -1.304 |        |  | -1.141 |        |  | EN.SM.Down.12H                     |
| ADAMTS13  |        |        | -1.313 |        |  | -1.773 |        |  | EN.SM.Down.12H                     |
| AER61     |        |        | -1.438 |        |  | -1.395 |        |  | EN.SM.Down.12H                     |
| AGBL5     |        |        | -3.372 |        |  | -2.832 |        |  | EN.SM.Down.12H                     |
| AKT3      |        |        | -1.078 |        |  | -1.09  |        |  | EN.SM.Down.12H                     |
| ALDH6A1   |        |        | -2.099 |        |  | -1.645 |        |  | EN.SM.Down.12H                     |
| ANGPT4    |        |        | -1.035 |        |  | -1.332 |        |  | EN.SM.Down.12H                     |
| ANGPTL2   |        |        | -2.368 |        |  | -1.574 |        |  | EN.SM.Down.12H                     |
| APP       |        |        | -1.334 |        |  | -1.209 |        |  | EN.SM.Down.12H                     |
| ARHGFB6   |        |        | -2.175 |        |  | -1.64  |        |  | EN.SM.Down.12H                     |
| ARMC9     |        |        | -2.868 |        |  | -3.455 |        |  | EN.SM.Down.12H                     |
| AUH       |        |        | -1.352 |        |  | -1.474 |        |  | EN.SM.Down.12H                     |
| B3GNT1    |        |        | -2.062 |        |  | -2.002 |        |  | EN.SM.Down.12H                     |
| BAZ2B     |        |        | -1.307 |        |  | -1.225 |        |  | EN.SM.Down.12H                     |
| BRX       |        |        | -1.659 |        |  | -1.248 |        |  | EN.SM.Down.12H                     |
| BEND5     |        |        | -2.192 |        |  | -2.217 |        |  | EN.SM.Down.12H                     |
| BGLAP     |        |        | -1.588 |        |  | -1.177 |        |  | EN.SM.Down.12H                     |
| BNIP3     |        |        | -1.689 |        |  | -1.893 |        |  | EN.SM.Down.12H                     |
| BRD8      |        |        | -1.101 |        |  | -1.098 |        |  | EN.SM.Down.12H                     |
| BST1      |        |        | -1.421 |        |  | -1.078 |        |  | EN.SM.Down.12H                     |
| C1QA      |        |        | -2.9   |        |  | -1.464 |        |  | EN.SM.Down.12H                     |
| CAST      |        |        | -1.259 |        |  | -1.258 |        |  | EN.SM.Down.12H                     |
| CAN2      |        |        | -1.456 |        |  | -2.31  |        |  | EN.SM.Down.12H                     |
| CC2D2A    |        |        | -1.167 |        |  | -1.056 |        |  | EN.SM.Down.12H                     |
| CCRL1     |        |        | -3.939 |        |  | -1.426 |        |  | EN.SM.Down.12H                     |
| CD81      |        |        | -1.077 |        |  | -1.229 |        |  | EN.SM.Down.12H                     |
| CD99      |        |        | -1.469 |        |  | -1.753 |        |  | EN.SM.Down.12H                     |
| CDC14B    |        |        | -1.828 |        |  | -1.508 |        |  | EN.SM.Down.12H                     |
| CDS2      |        |        | -1.595 |        |  | -1.467 |        |  | EN.SM.Down.12H                     |
| CETN2     |        |        | -1.209 |        |  | -1.196 |        |  | EN.SM.Down.12H                     |
| CHROLL1   |        |        | -1.515 |        |  | -1.79  |        |  | EN.SM.Down.12H                     |
| CHURC1    |        |        | -1.034 |        |  | -1.345 |        |  | EN.SM.Down.12H                     |
| CMBL      |        |        | -1.886 |        |  | -1.587 |        |  | EN.SM.Down.12H                     |
| CNKR3     |        |        | -1.171 |        |  | -1.563 |        |  | EN.SM.Down.12H                     |
| COG1      |        |        | -1.387 |        |  | -1.074 |        |  | EN.SM.Down.12H                     |
| CPEB3     |        |        | -1.253 |        |  | -1.844 |        |  | EN.SM.Down.12H                     |
| CRTP      |        |        | -1.446 |        |  | -1.791 |        |  | EN.SM.Down.12H                     |
| CTDSP1    |        |        | -1.273 |        |  | -1.185 |        |  | EN.SM.Down.12H                     |
| CUL4B     |        |        | -1.157 |        |  | -1.335 |        |  | EN.SM.Down.12H                     |
| CXK5      |        |        | -1.913 |        |  | -1.296 |        |  | EN.SM.Down.12H                     |
| DAG1      |        |        | -1.486 |        |  | -1.698 |        |  | EN.SM.Down.12H                     |
| DGKA      |        |        | -1.245 |        |  | -1.243 |        |  | EN.SM.Down.12H                     |
| DPYSL2    |        |        | -1.631 |        |  | -1.663 |        |  | EN.SM.Down.12H                     |
| DSG2      |        |        | -2.543 |        |  | -1.444 |        |  | EN.SM.Down.12H                     |
| EHS1      |        |        | -1.143 |        |  | -1.231 |        |  | EN.SM.Down.12H                     |
| EML1      |        |        | -1.255 |        |  | -1.34  |        |  | EN.SM.Down.12H                     |

|              |        |  |  |        |  |  |                |
|--------------|--------|--|--|--------|--|--|----------------|
| EPB41L3      | -1.693 |  |  | -1.286 |  |  | EN.SM.Down.12H |
| EPST11       | -1.317 |  |  | -1.361 |  |  | EN.SM.Down.12H |
| FAD52        | -1.458 |  |  | -1.082 |  |  | EN.SM.Down.12H |
| FAIM2        | -1.918 |  |  | -2.315 |  |  | EN.SM.Down.12H |
| FANS2        | -1.134 |  |  | -1.176 |  |  | EN.SM.Down.12H |
| FBP2         | -1.11  |  |  | -1.499 |  |  | EN.SM.Down.12H |
| FBXO25       | -2.247 |  |  | -2.397 |  |  | EN.SM.Down.12H |
| FGFR2        | -2.232 |  |  | -2.964 |  |  | EN.SM.Down.12H |
| FGFR2IIC     | -1.205 |  |  | -2.061 |  |  | EN.SM.Down.12H |
| FOLH1        | -2.239 |  |  | -1.715 |  |  | EN.SM.Down.12H |
| GATAD2B      | -1.068 |  |  | -1.149 |  |  | EN.SM.Down.12H |
| GCDH         | -1.327 |  |  | -1.35  |  |  | EN.SM.Down.12H |
| GLB1         | -1.148 |  |  | -1.072 |  |  | EN.SM.Down.12H |
| GLB1L        | -1.151 |  |  | -1.104 |  |  | EN.SM.Down.12H |
| GLCE         | -1.152 |  |  | -1.673 |  |  | EN.SM.Down.12H |
| GNB3         | -1.564 |  |  | -1.082 |  |  | EN.SM.Down.12H |
| GNB5         | -1.604 |  |  | -1.656 |  |  | EN.SM.Down.12H |
| GPI          | -1.229 |  |  | -1.545 |  |  | EN.SM.Down.12H |
| HBP1         | -1.564 |  |  | -1.177 |  |  | EN.SM.Down.12H |
| HEBP1        | -1.5   |  |  | -1.668 |  |  | EN.SM.Down.12H |
| HINT2        | -1.653 |  |  | -1.545 |  |  | EN.SM.Down.12H |
| HOXA10       | -1.109 |  |  | -1.231 |  |  | EN.SM.Down.12H |
| IFI35        | -1.613 |  |  | -2.119 |  |  | EN.SM.Down.12H |
| IGF1R        | -1.045 |  |  | -1.311 |  |  | EN.SM.Down.12H |
| IGFBP2       | -1.33  |  |  | -1.616 |  |  | EN.SM.Down.12H |
| IGFBP6       | -2.174 |  |  | -1.109 |  |  | EN.SM.Down.12H |
| INSR         | -2.228 |  |  | -1.443 |  |  | EN.SM.Down.12H |
| ITGA7        | -1.436 |  |  | -1.698 |  |  | EN.SM.Down.12H |
| ITGB8        | -2.001 |  |  | -2.642 |  |  | EN.SM.Down.12H |
| ITM2C        | -1.403 |  |  | -1.199 |  |  | EN.SM.Down.12H |
| JAZF1        | -1.465 |  |  | -1.338 |  |  | EN.SM.Down.12H |
| JMY          | -1.407 |  |  | -1.382 |  |  | EN.SM.Down.12H |
| KCNIP3       | -1.662 |  |  | -1.506 |  |  | EN.SM.Down.12H |
| KLHL24       | -2.779 |  |  | -2.685 |  |  | EN.SM.Down.12H |
| LEP          | -1.755 |  |  | -3.565 |  |  | EN.SM.Down.12H |
| LOC100174968 | -1.876 |  |  | -1.76  |  |  | EN.SM.Down.12H |
| LOC474570    | -2.298 |  |  | -2.817 |  |  | EN.SM.Down.12H |
| LOC474791    | -1.425 |  |  | -1.911 |  |  | EN.SM.Down.12H |
| LOC475290    | -1.189 |  |  | -1.482 |  |  | EN.SM.Down.12H |
| LOC475409    | -1.925 |  |  | -1.521 |  |  | EN.SM.Down.12H |
| LOC475470    | -1.489 |  |  | -1.112 |  |  | EN.SM.Down.12H |
| LOC476006    | -2.086 |  |  | -1.542 |  |  | EN.SM.Down.12H |
| LOC477395    | -1.163 |  |  | -1.026 |  |  | EN.SM.Down.12H |
| LOC477419    | -1.2   |  |  | -1.002 |  |  | EN.SM.Down.12H |
| LOC478584    | -1.549 |  |  | -1.581 |  |  | EN.SM.Down.12H |
| LOC478866    | -1.568 |  |  | -1.42  |  |  | EN.SM.Down.12H |
| LOC479382    | -1.285 |  |  | -1.71  |  |  | EN.SM.Down.12H |
| LOC479637    | -1.101 |  |  | -1.219 |  |  | EN.SM.Down.12H |
| LOC481385    | -1.31  |  |  | -1.675 |  |  | EN.SM.Down.12H |
| LOC482349    | -1.283 |  |  | -1.73  |  |  | EN.SM.Down.12H |
| LOC482730    | -1.779 |  |  | -1.865 |  |  | EN.SM.Down.12H |
| LOC483174    | -1.609 |  |  | -1.75  |  |  | EN.SM.Down.12H |
| LOC484139    | -1.057 |  |  | -1.25  |  |  | EN.SM.Down.12H |
| LOC485723    | -1.504 |  |  | -1.156 |  |  | EN.SM.Down.12H |
| LOC488476    | -1.363 |  |  | -1.533 |  |  | EN.SM.Down.12H |
| LOC489202    | -1.384 |  |  | -2.001 |  |  | EN.SM.Down.12H |
| LOC490089    | -1.33  |  |  | -1.593 |  |  | EN.SM.Down.12H |
| LOC490956    | -1.417 |  |  | -1.48  |  |  | EN.SM.Down.12H |
| LOC607161    | -1.182 |  |  | -1.558 |  |  | EN.SM.Down.12H |
| LOC607548    | -1.53  |  |  | -1.741 |  |  | EN.SM.Down.12H |
| LOC607830    | -2.073 |  |  | -1.7   |  |  | EN.SM.Down.12H |
| LOC608557    | -2.562 |  |  | -2.651 |  |  | EN.SM.Down.12H |
| LOC609039    | -1.548 |  |  | -1.349 |  |  | EN.SM.Down.12H |
| LOC610195    | -2.211 |  |  | -1.804 |  |  | EN.SM.Down.12H |
| LOC610260    | -2.348 |  |  | -2.847 |  |  | EN.SM.Down.12H |
| LOC610433    | -1.214 |  |  | -1.3   |  |  | EN.SM.Down.12H |
| LOC611081    | -1.259 |  |  | -1.26  |  |  | EN.SM.Down.12H |
| LOC611487    | -1.536 |  |  | -1.579 |  |  | EN.SM.Down.12H |
| LOC611851    | -1.317 |  |  | -1.054 |  |  | EN.SM.Down.12H |
| LRRC28       | -1.004 |  |  | -1.165 |  |  | EN.SM.Down.12H |
| LYPLAL1      | -1.284 |  |  | -1.736 |  |  | EN.SM.Down.12H |
| LZTS2        | -1.208 |  |  | -1.366 |  |  | EN.SM.Down.12H |
| MAGEF1       | -1.323 |  |  | -1.432 |  |  | EN.SM.Down.12H |
| MAGI3        | -2.136 |  |  | -1.952 |  |  | EN.SM.Down.12H |
| MANEA        | -1.046 |  |  | -1.114 |  |  | EN.SM.Down.12H |
| MAP2         | -1.684 |  |  | -1.573 |  |  | EN.SM.Down.12H |
| MAP7D3       | -1.095 |  |  | -1.046 |  |  | EN.SM.Down.12H |
| MBTD1        | -1.798 |  |  | -1.293 |  |  | EN.SM.Down.12H |
| MMP16        | -1.992 |  |  | -1.05  |  |  | EN.SM.Down.12H |
| MOCS2        | -1.058 |  |  | -1.168 |  |  | EN.SM.Down.12H |
| MPZL1        | -1.164 |  |  | -1.112 |  |  | EN.SM.Down.12H |
| MRRGRF       | -1.196 |  |  | -1.597 |  |  | EN.SM.Down.12H |
| MRV11        | -1.736 |  |  | -2.123 |  |  | EN.SM.Down.12H |
| MSRB3        | -1.619 |  |  | -1.727 |  |  | EN.SM.Down.12H |
| MYLK         | -1.378 |  |  | -1.374 |  |  | EN.SM.Down.12H |
| MYLK3        | -1.286 |  |  | -1.314 |  |  | EN.SM.Down.12H |
| NAPEPLD      | -1.354 |  |  | -1.209 |  |  | EN.SM.Down.12H |
| NBEA         | -1.745 |  |  | -1.55  |  |  | EN.SM.Down.12H |
| NDFIP1       | -1.049 |  |  | -1.191 |  |  | EN.SM.Down.12H |
| NDUFA3       | -1.197 |  |  | -1.15  |  |  | EN.SM.Down.12H |
| NDUFB10      | -1.486 |  |  | -1.452 |  |  | EN.SM.Down.12H |
| NDUFS7       | -1.171 |  |  | -1.387 |  |  | EN.SM.Down.12H |
| NMES         | -2.238 |  |  | -2.195 |  |  | EN.SM.Down.12H |
| NOC2L        | -2.2   |  |  | -1.232 |  |  | EN.SM.Down.12H |
| NRGN         | -1.48  |  |  | -1.068 |  |  | EN.SM.Down.12H |
| NUDT18       | -1.482 |  |  | -1.163 |  |  | EN.SM.Down.12H |
| NUDT2        | -1.579 |  |  | -1.683 |  |  | EN.SM.Down.12H |
| NUPR1        | -2.322 |  |  | -1.529 |  |  | EN.SM.Down.12H |
| OMD          | -2.964 |  |  | -2.223 |  |  | EN.SM.Down.12H |
| OSBP1A       | -1.279 |  |  | -1.152 |  |  | EN.SM.Down.12H |
| PARP2        | -2.12  |  |  | -1.612 |  |  | EN.SM.Down.12H |
| PARVA        | -1.178 |  |  | -1.422 |  |  | EN.SM.Down.12H |
| PCMTD1       | -1.195 |  |  | -1.572 |  |  | EN.SM.Down.12H |
| PDE4DIP      | -1.287 |  |  | -1.175 |  |  | EN.SM.Down.12H |
| PK4          | -2.635 |  |  | -1.815 |  |  | EN.SM.Down.12H |
| PEBP1        | -1.773 |  |  | -1.592 |  |  | EN.SM.Down.12H |
| PER3         | -2.623 |  |  | -3.125 |  |  | EN.SM.Down.12H |
| PFKM         | -1.565 |  |  | -2.057 |  |  | EN.SM.Down.12H |
| PGAP1        | -1.286 |  |  | -2.043 |  |  | EN.SM.Down.12H |
| PGMZL1       | -1.494 |  |  | -1.438 |  |  | EN.SM.Down.12H |
| PIAS2        | -1.332 |  |  | -1.175 |  |  | EN.SM.Down.12H |
| PLCXD3       | -1.799 |  |  | -1.248 |  |  | EN.SM.Down.12H |
| PNCK         | -1.008 |  |  | -1.475 |  |  | EN.SM.Down.12H |
| PPL          | -2.239 |  |  | -2.352 |  |  | EN.SM.Down.12H |
| PREX2        | -1.842 |  |  | -1.606 |  |  | EN.SM.Down.12H |
| PRIM1        | -1.553 |  |  | -1.759 |  |  | EN.SM.Down.12H |
| PRKRA        | -1.252 |  |  | -1.125 |  |  | EN.SM.Down.12H |
| PROS1        | -2.339 |  |  | -1.678 |  |  | EN.SM.Down.12H |
| PRTFDC1      | -1.761 |  |  | -2.725 |  |  | EN.SM.Down.12H |
| PSIP1        | -1.412 |  |  | -1.085 |  |  | EN.SM.Down.12H |
| PTGFRN       | -1.058 |  |  | -1.311 |  |  | EN.SM.Down.12H |
| PTPA43       | -3.457 |  |  | -2.913 |  |  | EN.SM.Down.12H |
| PTPLAD2      | -1.321 |  |  | -1.188 |  |  | EN.SM.Down.12H |



|               |        |        |        |  |  |        |        |  |  |                      |
|---------------|--------|--------|--------|--|--|--------|--------|--|--|----------------------|
| PTPN13        | -2.291 |        |        |  |  | -2.276 |        |  |  | EN.SM.Down.12H       |
| PYGB          | -1.431 |        |        |  |  | -1.512 |        |  |  | EN.SM.Down.12H       |
| RBPA          | -1.529 |        |        |  |  | -1.39  |        |  |  | EN.SM.Down.12H       |
| RCOR3         | -1.275 |        |        |  |  | -1.137 |        |  |  | EN.SM.Down.12H       |
| RMND5A        | -1.128 |        |        |  |  | -1.523 |        |  |  | EN.SM.Down.12H       |
| RNASEH2C      | -1.023 |        |        |  |  | -1.087 |        |  |  | EN.SM.Down.12H       |
| RNASEL        | -1.518 |        |        |  |  | -2.081 |        |  |  | EN.SM.Down.12H       |
| RNASEN        | -1.835 |        |        |  |  | -1.175 |        |  |  | EN.SM.Down.12H       |
| RNF180        | -1.883 |        |        |  |  | -1.543 |        |  |  | EN.SM.Down.12H       |
| RNLS          | -1.968 |        |        |  |  | -1.951 |        |  |  | EN.SM.Down.12H       |
| ROR1          | -1.578 |        |        |  |  | -1.135 |        |  |  | EN.SM.Down.12H       |
| RPH3AL        | -1.775 |        |        |  |  | -1.069 |        |  |  | EN.SM.Down.12H       |
| RSU1          | -1.029 |        |        |  |  | -1.175 |        |  |  | EN.SM.Down.12H       |
| RWDD3         | -1.477 |        |        |  |  | -1.148 |        |  |  | EN.SM.Down.12H       |
| S100A1        | -2.205 |        |        |  |  | -1.677 |        |  |  | EN.SM.Down.12H       |
| S1PR3         | -1.203 |        |        |  |  | -1.061 |        |  |  | EN.SM.Down.12H       |
| SESN1         | -1.219 |        |        |  |  | -1.199 |        |  |  | EN.SM.Down.12H       |
| SGCE          | -1.822 |        |        |  |  | -1.6   |        |  |  | EN.SM.Down.12H       |
| SGTB          | -1.318 |        |        |  |  | -1.332 |        |  |  | EN.SM.Down.12H       |
| SLC2A8        | -1.852 |        |        |  |  | -1.173 |        |  |  | EN.SM.Down.12H       |
| SLC4A3        | -1.503 |        |        |  |  | -1.262 |        |  |  | EN.SM.Down.12H       |
| SMAD9         | -1.434 |        |        |  |  | -1.715 |        |  |  | EN.SM.Down.12H       |
| SMARCA1       | -1.76  |        |        |  |  | -1.709 |        |  |  | EN.SM.Down.12H       |
| SNTA1         | -1.42  |        |        |  |  | -1.504 |        |  |  | EN.SM.Down.12H       |
| SPATA6        | -1.425 |        |        |  |  | -1.296 |        |  |  | EN.SM.Down.12H       |
| SPATA7        | -1.237 |        |        |  |  | -1.188 |        |  |  | EN.SM.Down.12H       |
| STT           | -1.424 |        |        |  |  | -1.668 |        |  |  | EN.SM.Down.12H       |
| STAU2         | -1.272 |        |        |  |  | -1.228 |        |  |  | EN.SM.Down.12H       |
| STON1-GTF2A1L | -1.285 |        |        |  |  | -1.688 |        |  |  | EN.SM.Down.12H       |
| STXB6         | -1.307 |        |        |  |  | -1.191 |        |  |  | EN.SM.Down.12H       |
| SUOX          | -1.311 |        |        |  |  | -1.284 |        |  |  | EN.SM.Down.12H       |
| SYT11         | -1.451 |        |        |  |  | -1.259 |        |  |  | EN.SM.Down.12H       |
| SYT9          | -1.627 |        |        |  |  | -2.281 |        |  |  | EN.SM.Down.12H       |
| TCEA2         | -1.645 |        |        |  |  | -1.546 |        |  |  | EN.SM.Down.12H       |
| TDRD7         | -1.11  |        |        |  |  | -1.392 |        |  |  | EN.SM.Down.12H       |
| TEX264        | -1.269 |        |        |  |  | -1.106 |        |  |  | EN.SM.Down.12H       |
| TFDP2         | -1.303 |        |        |  |  | -1.198 |        |  |  | EN.SM.Down.12H       |
| THRA          | -1.349 |        |        |  |  | -1.435 |        |  |  | EN.SM.Down.12H       |
| TM2D2         | -1.752 |        |        |  |  | -1.298 |        |  |  | EN.SM.Down.12H       |
| TMEM132D      | -1.005 |        |        |  |  | -1.016 |        |  |  | EN.SM.Down.12H       |
| TMEM176A      | -2.127 |        |        |  |  | -1.706 |        |  |  | EN.SM.Down.12H       |
| TMEM43        | -1.101 |        |        |  |  | -1.35  |        |  |  | EN.SM.Down.12H       |
| TNFAIP8L3     | -1.294 |        |        |  |  | -1.617 |        |  |  | EN.SM.Down.12H       |
| TRMT11        | -1.235 |        |        |  |  | -1.049 |        |  |  | EN.SM.Down.12H       |
| TSMT1         | -1.558 |        |        |  |  | -1.094 |        |  |  | EN.SM.Down.12H       |
| TSNAXIP1      | -1.29  |        |        |  |  | -1.087 |        |  |  | EN.SM.Down.12H       |
| TTC14         | -1.636 |        |        |  |  | -1.54  |        |  |  | EN.SM.Down.12H       |
| TTC21B        | -1.5   |        |        |  |  | -2.067 |        |  |  | EN.SM.Down.12H       |
| TTC3          | -1.106 |        |        |  |  | -1.126 |        |  |  | EN.SM.Down.12H       |
| UBE2CBP       | -1.158 |        |        |  |  | -1.243 |        |  |  | EN.SM.Down.12H       |
| UBE2E3        | -1.013 |        |        |  |  | -1.217 |        |  |  | EN.SM.Down.12H       |
| UBRS          | -1.01  |        |        |  |  | -1.076 |        |  |  | EN.SM.Down.12H       |
| UTRN          | -1.24  |        |        |  |  | -1.567 |        |  |  | EN.SM.Down.12H       |
| VAMP4         | -1.072 |        |        |  |  | -1.003 |        |  |  | EN.SM.Down.12H       |
| VPS11         | -1.142 |        |        |  |  | -1.141 |        |  |  | EN.SM.Down.12H       |
| YPEL2         | -2.118 |        |        |  |  | -1.555 |        |  |  | EN.SM.Down.12H       |
| ZBTB20        | -2.358 |        |        |  |  | -2.366 |        |  |  | EN.SM.Down.12H       |
| ZBTB25        | -1.828 |        |        |  |  | -1.255 |        |  |  | EN.SM.Down.12H       |
| ZFH3          | -1.359 |        |        |  |  | -1.464 |        |  |  | EN.SM.Down.12H       |
| ZFP106        | -1.624 |        |        |  |  | -1.325 |        |  |  | EN.SM.Down.12H       |
| ZFVE1         | -1.484 |        |        |  |  | -1.548 |        |  |  | EN.SM.Down.12H       |
| ZNF365        | -1.305 |        |        |  |  | -1.453 |        |  |  | EN.SM.Down.12H       |
| ZNF568        | -1.065 |        |        |  |  | -1.154 |        |  |  | EN.SM.Down.12H       |
| ZNF575        | -1.661 |        |        |  |  | -2.209 |        |  |  | EN.SM.Down.12H       |
| ZNF711        | -1.763 |        |        |  |  | -1.191 |        |  |  | EN.SM.Down.12H       |
| INPP4B        |        | -2.14  |        |  |  |        | -1.399 |  |  | EN.SM.Down.24H       |
| LOC475625     |        | -1.919 |        |  |  |        | -2.1   |  |  | EN.SM.Down.24H       |
| ACTG2         |        |        | -1.982 |  |  |        | -2.307 |  |  | EN.SM.Down.7D        |
| ACT1          |        |        | -1.191 |  |  |        | -1.335 |  |  | EN.SM.Down.7D        |
| REX4          |        |        | -1.136 |  |  |        | -1.116 |  |  | EN.SM.Down.7D        |
| CCND2         |        |        | -1.27  |  |  |        | -1.44  |  |  | EN.SM.Down.7D        |
| DNAH17        |        |        | -2.369 |  |  |        | -2.043 |  |  | EN.SM.Down.7D        |
| FLNC          |        |        | -1.302 |  |  |        | -1.609 |  |  | EN.SM.Down.7D        |
| FRMD3         |        |        | -1.881 |  |  |        | -1.586 |  |  | EN.SM.Down.7D        |
| GUCY1A2       |        |        | -2.639 |  |  |        | -1.607 |  |  | EN.SM.Down.7D        |
| KCNH2         |        |        | -1.173 |  |  |        | -1.28  |  |  | EN.SM.Down.7D        |
| LOC481434     |        |        | -1.108 |  |  |        | -1.496 |  |  | EN.SM.Down.7D        |
| LZT51         |        |        | -1.095 |  |  |        | -1.888 |  |  | EN.SM.Down.7D        |
| MAP3K5        |        |        | -1.19  |  |  |        | -1.011 |  |  | EN.SM.Down.7D        |
| MAST4         |        |        | -1.334 |  |  |        | -1.303 |  |  | EN.SM.Down.7D        |
| PGAM5         |        |        | -1.069 |  |  |        | -1.321 |  |  | EN.SM.Down.7D        |
| SLC25A30      |        |        | -1.602 |  |  |        | -1.585 |  |  | EN.SM.Down.7D        |
| SRF           |        |        | -1.448 |  |  |        | -1.698 |  |  | EN.SM.Down.7D        |
| STC1          |        |        | -1.982 |  |  |        | -1.515 |  |  | EN.SM.Down.7D        |
| TMOD1         |        |        | -1.081 |  |  |        | -2.257 |  |  | EN.SM.Down.7D        |
| TPS3111       |        |        | -1.086 |  |  |        | -1.339 |  |  | EN.SM.Down.7D        |
| TPPP          |        |        | -1.064 |  |  |        | -1.196 |  |  | EN.SM.Down.7D        |
| TTN           |        |        | -1.247 |  |  |        | -1.578 |  |  | EN.SM.Down.7D        |
| WDR54         |        |        | -1.03  |  |  |        | -1.272 |  |  | EN.SM.Down.7D        |
| ZFAND3        |        |        | -1.105 |  |  |        | -1.737 |  |  | EN.SM.Down.7D        |
| ZNF689        |        |        | -1.093 |  |  |        | -1.72  |  |  | EN.SM.Down.7D        |
| FAH           |        |        |        |  |  | -1.36  |        |  |  | SM.Only.Down.12H     |
| AADAC         |        | -1.918 |        |  |  | -2.535 | -2.216 |  |  | SM.Only.Down.12H.24H |
| ACSL6         |        |        |        |  |  | -1.099 | -2.126 |  |  | SM.Only.Down.12H.24H |
| AR            |        |        |        |  |  | -2.232 | -2.752 |  |  | SM.Only.Down.12H.24H |
| ARMC2         |        |        |        |  |  | -1.347 | -1.588 |  |  | SM.Only.Down.12H.24H |
| CCBL2         |        |        |        |  |  | -1.447 | -1.643 |  |  | SM.Only.Down.12H.24H |
| CCL14         |        |        |        |  |  | -1.173 | -1.332 |  |  | SM.Only.Down.12H.24H |
| CDON          |        |        |        |  |  | -1.507 | -1.848 |  |  | SM.Only.Down.12H.24H |
| CTED2         |        |        |        |  |  | -1.904 | -1.847 |  |  | SM.Only.Down.12H.24H |
| COLLEC12      |        |        |        |  |  | -2.434 | -1.876 |  |  | SM.Only.Down.12H.24H |
| DYSF          |        |        |        |  |  | -1.411 | -1.39  |  |  | SM.Only.Down.12H.24H |
| GRID2         |        |        |        |  |  | -1.273 | -1.946 |  |  | SM.Only.Down.12H.24H |
| ICA11         |        |        |        |  |  | -1.482 | -2.509 |  |  | SM.Only.Down.12H.24H |
| ITGA8         |        |        |        |  |  | -1.939 | -1.868 |  |  | SM.Only.Down.12H.24H |
| LOC478877     |        |        |        |  |  | -2.617 | -2.757 |  |  | SM.Only.Down.12H.24H |
| MGP           |        |        |        |  |  | -2.011 | -2.491 |  |  | SM.Only.Down.12H.24H |
| MIF           |        |        |        |  |  | -3.432 | -1.984 |  |  | SM.Only.Down.12H.24H |
| MOSC1         |        |        |        |  |  | -1.584 | -1.647 |  |  | SM.Only.Down.12H.24H |
| NO52          |        |        |        |  |  | -1.281 | -2.503 |  |  | SM.Only.Down.12H.24H |
| OPHN1         |        |        |        |  |  | -1.247 | -2.063 |  |  | SM.Only.Down.12H.24H |
| PIK3R2        |        |        |        |  |  | -1.368 | -1.967 |  |  | SM.Only.Down.12H.24H |
| PKD2          |        |        |        |  |  | -1.192 | -2.518 |  |  | SM.Only.Down.12H.24H |
| RAB12         |        |        |        |  |  | -1.067 | -1.765 |  |  | SM.Only.Down.12H.24H |
| RBM24         |        |        |        |  |  | -1.603 | -2.225 |  |  | SM.Only.Down.12H.24H |
| SFRB72        |        |        |        |  |  | -2.482 | -2.681 |  |  | SM.Only.Down.12H.24H |
| SH3GL2        |        |        |        |  |  | -1.561 | -2.315 |  |  | SM.Only.Down.12H.24H |
| SPTB          |        |        |        |  |  | -2.06  | -3.442 |  |  | SM.Only.Down.12H.24H |
| SPTBN1        |        |        |        |  |  | -1.504 | -1.365 |  |  | SM.Only.Down.12H.24H |
| THSD4         |        |        |        |  |  | -1.35  | -1.619 |  |  | SM.Only.Down.12H.24H |
| TMEM178       |        |        |        |  |  | -2.162 | -1.76  |  |  | SM.Only.Down.12H.24H |
| TMX4          |        |        |        |  |  | -1.374 | -1.718 |  |  | SM.Only.Down.12H.24H |
| UNC84A        |        |        |        |  |  | -1.31  | -1.384 |  |  | SM.Only.Down.12H.24H |

|           |        |        |        |        |       |       |  |        |        |        |  |  |  |  |  |  |  |  |  |  |                      |                                                  |
|-----------|--------|--------|--------|--------|-------|-------|--|--------|--------|--------|--|--|--|--|--|--|--|--|--|--|----------------------|--------------------------------------------------|
| UPRT      |        |        |        |        |       |       |  | -1.114 | -1.371 |        |  |  |  |  |  |  |  |  |  |  | SM.Only.Down.12H.24H |                                                  |
| WDR66     |        |        |        |        |       |       |  | -1.541 | -1.646 |        |  |  |  |  |  |  |  |  |  |  |                      | SM.Only.Down.12H.24H                             |
| ABCA6     |        |        |        |        |       |       |  | -3.541 |        | -2.86  |  |  |  |  |  |  |  |  |  |  |                      | SM.Only.Down.12H.7D                              |
| ADAMTSL4  |        |        |        |        |       |       |  | -1.085 |        | -1.199 |  |  |  |  |  |  |  |  |  |  |                      | SM.Only.Down.12H.7D                              |
| AKAP11    |        |        |        |        |       |       |  | -1.129 |        | -1.069 |  |  |  |  |  |  |  |  |  |  |                      | SM.Only.Down.12H.7D                              |
| ALDH1L1   |        |        |        |        |       |       |  | -1.297 |        | -1.233 |  |  |  |  |  |  |  |  |  |  |                      | SM.Only.Down.12H.7D                              |
| ARHGAP12  |        |        |        |        |       |       |  | -1.111 |        | -1.178 |  |  |  |  |  |  |  |  |  |  |                      | SM.Only.Down.12H.7D                              |
| ARIH2     |        |        |        |        |       |       |  | -1.043 |        | -1.387 |  |  |  |  |  |  |  |  |  |  |                      | SM.Only.Down.12H.7D                              |
| ATP2A3    |        |        |        |        |       |       |  | -1.498 |        | -1.719 |  |  |  |  |  |  |  |  |  |  |                      | SM.Only.Down.12H.7D                              |
| CCBL1     |        |        |        |        |       |       |  | -1.288 |        | -1     |  |  |  |  |  |  |  |  |  |  |                      | SM.Only.Down.12H.7D                              |
| CCDC33    |        |        |        |        |       |       |  | -1.083 |        | -1.414 |  |  |  |  |  |  |  |  |  |  |                      | SM.Only.Down.12H.7D                              |
| CHST3     |        |        |        |        |       |       |  | -1.262 |        | -1.407 |  |  |  |  |  |  |  |  |  |  |                      | SM.Only.Down.12H.7D                              |
| CLASP2    |        |        |        |        |       |       |  | -1.24  |        | -1.089 |  |  |  |  |  |  |  |  |  |  |                      | SM.Only.Down.12H.7D                              |
| CRIM1     |        |        |        |        |       |       |  | -1.127 |        | -1.308 |  |  |  |  |  |  |  |  |  |  |                      | SM.Only.Down.12H.7D                              |
| DTNBP1    |        |        |        |        |       |       |  | -1.059 |        | -1.175 |  |  |  |  |  |  |  |  |  |  |                      | SM.Only.Down.12H.7D                              |
| F3        |        |        |        |        |       |       |  | -1.013 |        | -2.86  |  |  |  |  |  |  |  |  |  |  |                      | SM.Only.Down.12H.7D                              |
| FGF18     |        |        |        |        |       |       |  | -1.353 |        | -1.279 |  |  |  |  |  |  |  |  |  |  |                      | SM.Only.Down.12H.7D                              |
| HMCN2     |        |        |        |        |       |       |  | -1.079 |        | -1.713 |  |  |  |  |  |  |  |  |  |  |                      | SM.Only.Down.12H.7D                              |
| ISM1      |        |        |        |        |       |       |  | -1.161 |        | -1.096 |  |  |  |  |  |  |  |  |  |  |                      | SM.Only.Down.12H.7D                              |
| ITGB4     |        |        |        |        |       |       |  | -1.488 |        | -1.606 |  |  |  |  |  |  |  |  |  |  |                      | SM.Only.Down.12H.7D                              |
| KCNQ1     |        |        |        |        |       |       |  | -1.062 |        | -1.086 |  |  |  |  |  |  |  |  |  |  |                      | SM.Only.Down.12H.7D                              |
| KIF7      |        |        |        |        |       |       |  | -1.074 |        | -1.434 |  |  |  |  |  |  |  |  |  |  |                      | SM.Only.Down.12H.7D                              |
| LOC403447 |        |        |        |        |       |       |  | -1.621 |        | -1.144 |  |  |  |  |  |  |  |  |  |  |                      | SM.Only.Down.12H.7D                              |
| LOC487445 |        |        |        |        |       |       |  | -1.271 |        | -1.18  |  |  |  |  |  |  |  |  |  |  |                      | SM.Only.Down.12H.7D                              |
| LOC607837 |        |        |        |        |       |       |  | -1.233 |        | -2.667 |  |  |  |  |  |  |  |  |  |  |                      | SM.Only.Down.12H.7D                              |
| LOC611316 |        |        |        |        |       |       |  | -1.189 |        | -1.285 |  |  |  |  |  |  |  |  |  |  |                      | SM.Only.Down.12H.7D                              |
| LOC611522 |        |        |        |        |       |       |  | -1.645 |        | -1.312 |  |  |  |  |  |  |  |  |  |  |                      | SM.Only.Down.12H.7D                              |
| MARPE3    |        |        |        |        |       |       |  | -2.087 |        | -1.212 |  |  |  |  |  |  |  |  |  |  |                      | SM.Only.Down.12H.7D                              |
| MT3       |        |        |        |        |       |       |  | -1.355 |        | -1.56  |  |  |  |  |  |  |  |  |  |  |                      | SM.Only.Down.12H.7D                              |
| MYOC      |        |        |        |        |       |       |  | -1.42  |        | -6.38  |  |  |  |  |  |  |  |  |  |  |                      | SM.Only.Down.12H.7D                              |
| NCAM1     |        |        |        |        |       |       |  | -1.249 |        | -1.117 |  |  |  |  |  |  |  |  |  |  |                      | SM.Only.Down.12H.7D                              |
| OSGEP1L   |        |        |        |        |       |       |  | -1.291 |        | -1.311 |  |  |  |  |  |  |  |  |  |  |                      | SM.Only.Down.12H.7D                              |
| PDLIM5    |        |        |        |        |       |       |  | -1.749 |        | -1.888 |  |  |  |  |  |  |  |  |  |  |                      | SM.Only.Down.12H.7D                              |
| PEX26     |        |        |        |        |       |       |  | -1.721 |        | -1.711 |  |  |  |  |  |  |  |  |  |  |                      | SM.Only.Down.12H.7D                              |
| PLB1      |        |        |        |        |       |       |  | -1.246 |        | -1.825 |  |  |  |  |  |  |  |  |  |  |                      | SM.Only.Down.12H.7D                              |
| PLNDC1    |        |        |        |        |       |       |  | -2.026 |        | -1.626 |  |  |  |  |  |  |  |  |  |  |                      | SM.Only.Down.12H.7D                              |
| POLJ2AF1  |        |        |        |        |       |       |  | -1.104 |        | -1.226 |  |  |  |  |  |  |  |  |  |  |                      | SM.Only.Down.12H.7D                              |
| PPP2R2B   |        |        |        |        |       |       |  | -1.012 |        | -1.265 |  |  |  |  |  |  |  |  |  |  |                      | SM.Only.Down.12H.7D                              |
| PPP2R5A   |        |        |        |        |       |       |  | -1.105 |        | -1.111 |  |  |  |  |  |  |  |  |  |  |                      | SM.Only.Down.12H.7D                              |
| PRKAA2    |        |        |        |        |       |       |  | -1.157 |        | -1.408 |  |  |  |  |  |  |  |  |  |  |                      | SM.Only.Down.12H.7D                              |
| PRPF4B    |        |        |        |        |       |       |  | -2.132 |        | -1.434 |  |  |  |  |  |  |  |  |  |  |                      | SM.Only.Down.12H.7D                              |
| PTPRD     |        |        |        |        |       |       |  | -2.026 |        | -2.219 |  |  |  |  |  |  |  |  |  |  |                      | SM.Only.Down.12H.7D                              |
| RBFPM52   |        |        |        |        |       |       |  | -1.406 |        | -1.639 |  |  |  |  |  |  |  |  |  |  |                      | SM.Only.Down.12H.7D                              |
| RRAGD     |        |        |        |        |       |       |  | -1.306 |        | -1.105 |  |  |  |  |  |  |  |  |  |  |                      | SM.Only.Down.12H.7D                              |
| STAC2     |        |        |        |        |       |       |  | -1.129 |        | -1.622 |  |  |  |  |  |  |  |  |  |  |                      | SM.Only.Down.12H.7D                              |
| STARD6    |        |        |        |        |       |       |  | -1.085 |        | -1.41  |  |  |  |  |  |  |  |  |  |  |                      | SM.Only.Down.12H.7D                              |
| TLN1      |        |        |        |        |       |       |  | -1.078 |        | -1.125 |  |  |  |  |  |  |  |  |  |  |                      | SM.Only.Down.12H.7D                              |
| TNFRSF19  |        |        |        |        |       |       |  | -1.166 |        | -1.773 |  |  |  |  |  |  |  |  |  |  |                      | SM.Only.Down.12H.7D                              |
| VPS26A    |        |        |        |        |       |       |  | -1.056 |        | -1.549 |  |  |  |  |  |  |  |  |  |  |                      | SM.Only.Down.12H.7D                              |
| ZBTB16    |        |        |        |        |       |       |  | -3.073 |        | -1.012 |  |  |  |  |  |  |  |  |  |  |                      | SM.Only.Down.12H.7D                              |
| ZDBF2     |        |        |        |        |       |       |  | -1.091 |        | -1.498 |  |  |  |  |  |  |  |  |  |  |                      | SM.Only.Down.12H.7D                              |
| ZFP96L1   |        |        |        |        |       |       |  | -1.229 |        | -1.227 |  |  |  |  |  |  |  |  |  |  |                      | SM.Only.Down.12H.7D                              |
| ZNF503    |        |        |        |        |       |       |  | -1.143 |        | -1.41  |  |  |  |  |  |  |  |  |  |  |                      | SM.Only.Down.12H.7D                              |
| ZRANB3    |        |        |        |        |       |       |  | -1.497 |        | -1.291 |  |  |  |  |  |  |  |  |  |  |                      | SM.Only.Down.12H.7D                              |
| CE2       |        |        |        |        |       |       |  |        | -1.782 | -1.652 |  |  |  |  |  |  |  |  |  |  |                      | SM.Only.Down.24H.7D                              |
| FGF1      |        |        |        |        |       |       |  |        | -2.697 | -1.285 |  |  |  |  |  |  |  |  |  |  |                      | SM.Only.Down.24H.7D                              |
| LOC478715 |        |        |        |        |       |       |  |        | -1.53  | -1.378 |  |  |  |  |  |  |  |  |  |  |                      | SM.Only.Down.24H.7D                              |
| TNS1      |        |        |        |        |       |       |  |        | -1.545 | -1.031 |  |  |  |  |  |  |  |  |  |  |                      | SM.Only.Down.24H.7D                              |
| MPZ       |        | -1.164 |        |        |       |       |  |        |        | -1.399 |  |  |  |  |  |  |  |  |  |  |                      | SM.Only.Down.7D                                  |
| PON3      | 2.645  | 2.73   | 3.164  |        |       |       |  | 2.279  | 3.268  | -2.219 |  |  |  |  |  |  |  |  |  |  |                      | EN.SM.Up.12H.24H, SM.Only.Down.7D, EN.Only.Up.2H |
| TFPI      |        | 5.194  | 5.695  | 6.444  | 4.655 |       |  | -1.688 |        |        |  |  |  |  |  |  |  |  |  |  |                      | SM.Only.Down.12H                                 |
| LUM       |        |        |        | 2.392  | 4.018 |       |  | -1.145 |        | 1.097  |  |  |  |  |  |  |  |  |  |  |                      | EN.SM.Up.7D, SM.Only.Down.12H, EN.Only.Up.30D    |
| P4HA3     |        | -1.341 |        | 1.607  |       |       |  | 1.342  |        | 2.69   |  |  |  |  |  |  |  |  |  |  |                      | EN.Only.Down.12H, EN.SM.Up.7D, SM.Only.Up.12H    |
| CRISPLD2  | 2.235  | 1.451  |        | -1.809 |       |       |  | 1.588  |        |        |  |  |  |  |  |  |  |  |  |  |                      | EN.Only.Down.7D, EN.SM.Up.12H, EN.Only.Up.2H     |
| LOC480396 | 4.123  |        |        | -1.077 |       | 4.029 |  | 1.825  |        |        |  |  |  |  |  |  |  |  |  |  |                      | EN.Only.Down.7D, EN.SM.Up.2H, SM.Only.Up.12H     |
| HTR7      |        | 1.533  | 2.228  |        |       |       |  | 1.936  |        | -1.444 |  |  |  |  |  |  |  |  |  |  |                      | EN.SM.Up.12H, SM.Only.Down.7D, EN.Only.Up.24H    |
| PRAM1     |        | 2.7    | 1.674  |        |       |       |  | 2.42   |        | -1.566 |  |  |  |  |  |  |  |  |  |  |                      | EN.SM.Up.12H, SM.Only.Down.7D, EN.Only.Up.24H    |
| DUSP16    | 2.857  |        |        |        |       | 2.594 |  | 1.907  |        | -1.167 |  |  |  |  |  |  |  |  |  |  |                      | EN.SM.Up.7D, SM.Only.Down.7D, SM.Only.Up.12H     |
| UBE2T     |        |        | 2.175  | 5.321  |       |       |  | -1.027 |        | 1.014  |  |  |  |  |  |  |  |  |  |  |                      | EN.SM.Up.7D, SM.Only.Down.12H, EN.Only.Up.24H    |
| LOC484877 |        | -1.508 |        | 1.249  |       |       |  |        |        | 1.259  |  |  |  |  |  |  |  |  |  |  |                      | EN.Only.Down.12H, EN.SM.Up.7D                    |
| RUFY3     |        | -1.395 |        | 1.186  |       |       |  |        |        | 1.085  |  |  |  |  |  |  |  |  |  |  |                      | EN.Only.Down.12H, EN.SM.Up.7D                    |
| CH25H     |        | -2.386 |        |        |       |       |  | 1.63   |        | 2.08   |  |  |  |  |  |  |  |  |  |  |                      | EN.Only.Down.12H, SM.Only.Up.12H.7D              |
| CD200     |        |        | -1.854 |        |       |       |  | 1.344  |        | 1.927  |  |  |  |  |  |  |  |  |  |  |                      | EN.Only.Down.24H                                 |
| SLC35B4   | -1.587 |        |        |        |       |       |  | 1.115  |        | 1.03   |  |  |  |  |  |  |  |  |  |  |                      | EN.Only.Down.2H, SM.Only.Up.12H.7D               |
| PPP2R1B   |        | 1.407  | 1.395  | -1.228 |       |       |  |        |        |        |  |  |  |  |  |  |  |  |  |  |                      | EN.Only.Down.7D, EN.Only.Up.12H.24H              |
| FST       |        | 1.861  |        | -2.507 |       |       |  | 2.229  |        |        |  |  |  |  |  |  |  |  |  |  |                      | EN.Only.Down.7D, EN.SM.Up.12H                    |
| GPBP4     |        | 1.045  |        | -1.216 |       |       |  | 1.349  |        |        |  |  |  |  |  |  |  |  |  |  |                      | EN.Only.Down.7D, EN.SM.Up.12H                    |
| EPRS      |        | 1.057  |        | -1.474 |       |       |  |        |        | 1.005  |  |  |  |  |  |  |  |  |  |  |                      | EN.Only.Down.7D, SM.Only.Up.7D, EN.Only.Up.12H   |
| C9        |        | 1.161  |        |        |       |       |  | 1.29   |        | -1.232 |  |  |  |  |  |  |  |  |  |  |                      | EN.SM.Up.12H, SM.Only.Down.7D                    |
| RPL35     |        | 1.998  |        |        |       |       |  | 2.073  |        | -1.005 |  |  |  |  |  |  |  |  |  |  |                      | EN.SM.Up.12H, SM.Only.Down.7D                    |
| CAMK2D    |        |        |        | 1.059  |       |       |  | -1.436 |        | 1.421  |  |  |  |  |  |  |  |  |  |  |                      | EN.SM.Up.7D, SM.Only.Down.12H                    |
| CD109     |        |        |        | 1.608  |       |       |  | -1.113 |        | 2.643  |  |  |  |  |  |  |  |  |  |  |                      | EN.SM.Up.7D, SM.Only.Down.12H                    |
| CEP152    |        |        |        | 1.449  |       |       |  | -1.135 |        | 1.465  |  |  |  |  |  |  |  |  |  |  |                      | EN.SM.Up.7D, SM.Only.Down.12H                    |
| DNML2     |        |        |        | 1.399  |       |       |  | -1.185 |        | 1.108  |  |  |  |  |  |  |  |  |  |  |                      | EN.SM.Up.7D, SM.Only.Down.12H                    |
| FKBP7     |        |        |        | -1.191 |       |       |  | -1.191 |        | 2.043  |  |  |  |  |  |  |  |  |  |  |                      | EN.SM.Up.7D, SM.Only.Down.12H                    |
| FNDC1     |        |        |        | 1.094  |       |       |  | -1.719 |        | 1.036  |  |  |  |  |  |  |  |  |  |  |                      | EN.SM.Up.7D, SM.Only.Down.12H                    |
| GINS1     |        |        |        | 1.308  |       |       |  | -1.023 |        | 1.197  |  |  |  |  |  |  |  |  |  |  |                      | EN.SM.Up.7D, SM.Only.Down.12H                    |
| IDH1      |        |        |        | 1.481  |       |       |  | -1.877 |        | 1.285  |  |  |  |  |  |  |  |  |  |  |                      | EN.SM.Up.7D, SM.Only.Down.12H                    |
| KIF4A     |        |        |        | 1.171  |       |       |  | -1.28  |        | 1.006  |  |  |  |  |  |  |  |  |  |  |                      | EN.SM.Up.7D, SM.Only.Down.12H                    |
| LOC487907 |        |        |        | 1.315  |       |       |  | -1.412 |        | 1.369  |  |  |  |  |  |  |  |  |  |  |                      | EN.SM.Up.7D, SM.Only.Down.12H                    |
| LOX       |        |        |        | 2.006  |       |       |  | -1.62  |        | 2.843  |  |  |  |  |  |  |  |  |  |  |                      | EN.SM.Up.7D, SM.Only.Down.12H                    |
| MMD1      |        |        |        | 2.367  |       |       |  | -1.098 |        | 2.611  |  |  |  |  |  |  |  |  |  |  |                      | EN.SM.Up.7D, SM.Only.Down.12H                    |
| MXRA5     |        |        |        | 3.699  |       |       |  | -1.67  |        | 4.205  |  |  |  |  |  |  |  |  |  |  |                      | EN.SM.Up.7D, SM.Only.Down.12H                    |
| PON2      |        |        |        | 1.094  |       |       |  | -1.068 |        | 1.45   |  |  |  |  |  |  |  |  |  |  |                      | EN.SM.Up.7D, SM.Only.Down.12H                    |
| STMN1     |        |        |        | 1.7    |       |       |  |        |        |        |  |  |  |  |  |  |  |  |  |  |                      |                                                  |

|           |        |        |        |  |  |        |        |        |                                  |
|-----------|--------|--------|--------|--|--|--------|--------|--------|----------------------------------|
| PCDHGA6   |        |        | -2.138 |  |  |        |        | 1.333  | EN.Only.Down.24H, SM.Only.Up.7D  |
| SEMASA    |        |        | -2.088 |  |  |        |        | 2.1    | EN.Only.Down.24H, SM.Only.Up.7D  |
| LOC478351 | -1.981 | 2.368  |        |  |  |        |        | 1.456  | EN.Only.Down.2H, EN.Only.Up.12H  |
| TBC1D7    | -1.384 |        |        |  |  |        |        |        | EN.Only.Down.2H, SM.Only.Up.7D   |
| PAK1      |        |        | -1.163 |  |  | 1.516  |        |        | EN.Only.Down.7D                  |
| RRAD      | 2.211  |        | -1.78  |  |  |        |        |        | EN.Only.Down.7D, EN.Only.Up.2H   |
| ECSR      |        |        | -1.269 |  |  | 1.698  |        |        | EN.Only.Down.7D, SM.Only.Up.12H  |
| LETM2     |        |        | -1.416 |  |  | 1.238  |        |        | EN.Only.Down.7D, SM.Only.Up.12H  |
| SLC25A15  |        |        | -1.182 |  |  | 1.207  |        |        | EN.Only.Down.7D, SM.Only.Up.12H  |
| UBE2E1    |        |        | -1.026 |  |  | 1.341  |        |        | EN.Only.Down.7D, SM.Only.Up.12H  |
| AARS      |        | 1.004  |        |  |  |        | -2.623 |        | EN.Only.Up.24H                   |
| NNI       | -1.603 |        |        |  |  | 1.045  |        |        | EN.Only.Down.12H, SM.Only.Up.12H |
| ZNF208    | 1.441  |        |        |  |  | -1.137 |        |        | SM.Only.Down.12H, EN.Only.Up.12H |
| DEPDC6    |        | 2.429  |        |  |  | -1.634 |        |        | SM.Only.Down.12H, EN.Only.Up.24H |
| HDHD3     |        | 2.497  |        |  |  | -1.07  |        |        | SM.Only.Down.12H, EN.Only.Up.24H |
| C3V5      |        |        | 1.765  |  |  | -1.199 |        |        | SM.Only.Down.12H, EN.Only.Up.7D  |
| DNM1      |        |        | 1.21   |  |  | -1.057 |        |        | SM.Only.Down.12H, EN.Only.Up.7D  |
| EFCAB1    |        |        | 1.541  |  |  | -1.382 |        |        | SM.Only.Down.12H, EN.Only.Up.7D  |
| FABP7     |        |        | 2.618  |  |  | -1.922 |        |        | SM.Only.Down.12H, EN.Only.Up.7D  |
| FMN2      |        |        | 2.25   |  |  | -1.34  |        |        | SM.Only.Down.12H, EN.Only.Up.7D  |
| HSPG2     |        |        | 1.334  |  |  | -1.006 |        |        | SM.Only.Down.12H, EN.Only.Up.7D  |
| IQGAP2    |        |        | 1.665  |  |  | -1.174 |        |        | SM.Only.Down.12H, EN.Only.Up.7D  |
| LOC607775 |        |        | 1.607  |  |  | -1.742 |        |        | SM.Only.Down.12H, EN.Only.Up.7D  |
| OLFML3    |        |        | 1.661  |  |  | -1.204 |        |        | SM.Only.Down.12H, EN.Only.Up.7D  |
| RASSF4    |        |        | 1.027  |  |  | -1.199 |        |        | SM.Only.Down.12H, EN.Only.Up.7D  |
| TTC38     |        |        | 1.496  |  |  | -1.201 |        |        | SM.Only.Down.12H, EN.Only.Up.7D  |
| ABC2      |        |        |        |  |  | -1.532 |        | 1.028  | SM.Only.Down.12H, SM.Only.Up.7D  |
| CCDC150   |        |        |        |  |  | -1.626 |        | 1.787  | SM.Only.Down.12H, SM.Only.Up.7D  |
| DNASE2    |        |        |        |  |  | -1.484 |        | 1.021  | SM.Only.Down.12H, SM.Only.Up.7D  |
| EGFLAM    |        |        |        |  |  | -1.695 |        | 1.555  | SM.Only.Down.12H, SM.Only.Up.7D  |
| FKBP9     |        |        |        |  |  | -1.45  |        | 1.006  | SM.Only.Down.12H, SM.Only.Up.7D  |
| HAUS1     |        |        |        |  |  | -1.254 |        | 1.208  | SM.Only.Down.12H, SM.Only.Up.7D  |
| KLK4      |        |        |        |  |  | -1.72  |        | 3.056  | SM.Only.Down.12H, SM.Only.Up.7D  |
| LOC478796 |        |        |        |  |  | -1.653 |        | 1.125  | SM.Only.Down.12H, SM.Only.Up.7D  |
| LOC489001 |        |        |        |  |  | -1.21  |        | 1.086  | SM.Only.Down.12H, SM.Only.Up.7D  |
| LOC607411 |        |        |        |  |  | -2.167 |        | 1.037  | SM.Only.Down.12H, SM.Only.Up.7D  |
| LOC510051 |        |        |        |  |  | -1.347 |        | 2.204  | SM.Only.Down.12H, SM.Only.Up.7D  |
| VRK2      |        | 1.29   |        |  |  |        | -1.964 |        | SM.Only.Down.24H, EN.Only.Up.24H |
| NPEPP5    |        | 1.393  |        |  |  |        |        | -1.145 | SM.Only.Down.7D, EN.Only.Up.12H  |
| SFI       |        | 1.097  |        |  |  |        |        | -1.15  | SM.Only.Down.7D, EN.Only.Up.12H  |
| SFXN4     |        | 1.175  |        |  |  |        |        | -1.888 | SM.Only.Down.7D, EN.Only.Up.12H  |
| SMEK1     |        | 1.145  |        |  |  |        |        | -1.421 | SM.Only.Down.7D, EN.Only.Up.12H  |
| ADM       | 1.657  |        |        |  |  |        |        | -2.092 | SM.Only.Down.7D, EN.Only.Up.2H   |
| HSP70     | 2.061  |        |        |  |  |        |        | -1.562 | SM.Only.Down.7D, EN.Only.Up.2H   |
| NRAA1     | 2.367  |        |        |  |  |        |        | -1.795 | SM.Only.Down.7D, EN.Only.Up.2H   |
| PPP1R15A  | 2.023  |        |        |  |  |        |        | -1.535 | SM.Only.Down.7D, EN.Only.Up.2H   |
| ARFGAP2   |        |        |        |  |  | 1.028  |        | -1.024 | SM.Only.Down.7D, SM.Only.Up.12H  |
| ARMC3     |        |        |        |  |  | 1.126  |        | -1.049 | SM.Only.Down.7D, SM.Only.Up.12H  |
| FARSA     |        |        |        |  |  | 1.351  |        | -1.214 | SM.Only.Down.7D, SM.Only.Up.12H  |
| LOC479778 |        |        |        |  |  | 1.021  |        | -1.381 | SM.Only.Down.7D, SM.Only.Up.12H  |
| MAPK1IP1L |        |        |        |  |  | 1.206  |        | -1.067 | SM.Only.Down.7D, SM.Only.Up.12H  |
| RSAD1     |        |        |        |  |  | 1.292  |        | -1.93  | SM.Only.Down.7D, SM.Only.Up.12H  |
| TMC01     |        |        |        |  |  | 1.134  |        | -1.026 | SM.Only.Down.7D, SM.Only.Up.12H  |
| TMEM185A  |        |        |        |  |  | 1.282  |        | -1.034 | SM.Only.Down.7D, SM.Only.Up.12H  |
| VEGFA     |        |        |        |  |  | 1.182  |        | -1.05  | SM.Only.Down.7D, SM.Only.Up.12H  |
| PRPF4     |        | -1.99  |        |  |  | 1.159  |        |        | SM.Only.Up.12H                   |
| PGM2      |        | -1.494 |        |  |  |        |        | 1.012  | SM.Only.Up.7D                    |
| PPARG     |        | -2.454 |        |  |  |        |        | 1.541  | SM.Only.Up.7D                    |
| AZL1D1    | 8-Mar  | -1.415 |        |  |  |        |        |        | EN.Only.Down.12H                 |
| ACADL     |        | -1.083 |        |  |  |        |        |        | EN.Only.Down.12H                 |
| ACSM2A    |        | -1.924 |        |  |  |        |        |        | EN.Only.Down.12H                 |
| ACSS3     |        | -1.373 |        |  |  |        |        |        | EN.Only.Down.12H                 |
| ADD1      |        | -1.242 |        |  |  |        |        |        | EN.Only.Down.12H                 |
| AFAP1L1   |        | -1.069 |        |  |  |        |        |        | EN.Only.Down.12H                 |
| AGBL3     |        | -1.562 |        |  |  |        |        |        | EN.Only.Down.12H                 |
| AHNAK     |        | -1.157 |        |  |  |        |        |        | EN.Only.Down.12H                 |
| AHNAK2    |        | -1.33  |        |  |  |        |        |        | EN.Only.Down.12H                 |
| ALDH3A2   |        | -1.038 |        |  |  |        |        |        | EN.Only.Down.12H                 |
| AMN1      |        | -1.192 |        |  |  |        |        |        | EN.Only.Down.12H                 |
| APBB2     |        | -1.235 |        |  |  |        |        |        | EN.Only.Down.12H                 |
| ARFGEF2   |        | -1.084 |        |  |  |        |        |        | EN.Only.Down.12H                 |
| ARRHGDB   |        | -1.465 |        |  |  |        |        |        | EN.Only.Down.12H                 |
| ARRHGEF12 |        | -1.378 |        |  |  |        |        |        | EN.Only.Down.12H                 |
| ARRB1     |        | -1.256 |        |  |  |        |        |        | EN.Only.Down.12H                 |
| ASB13     |        | -1.17  |        |  |  |        |        |        | EN.Only.Down.12H                 |
| ASB5      |        | -1.724 |        |  |  |        |        |        | EN.Only.Down.12H                 |
| ATPS1     |        | -1.282 |        |  |  |        |        |        | EN.Only.Down.12H                 |
| BBS9      |        | -1.199 |        |  |  |        |        |        | EN.Only.Down.12H                 |
| CASC4     |        | -1.15  |        |  |  |        |        |        | EN.Only.Down.12H                 |
| CBR3      |        | -1.556 |        |  |  |        |        |        | EN.Only.Down.12H                 |
| CBX3      |        | -1.016 |        |  |  |        |        |        | EN.Only.Down.12H                 |
| CCDC39    |        | -1.005 |        |  |  |        |        |        | EN.Only.Down.12H                 |
| CCDC85B   |        | -1.647 |        |  |  |        |        |        | EN.Only.Down.12H                 |
| CCS       |        | -1.027 |        |  |  |        |        |        | EN.Only.Down.12H                 |
| CGNL1     |        | -1.791 |        |  |  |        |        |        | EN.Only.Down.12H                 |
| CLCN4     |        | -1.176 |        |  |  |        |        |        | EN.Only.Down.12H                 |
| COL13A1   |        | -1.075 |        |  |  |        |        |        | EN.Only.Down.12H                 |
| CRIP1     |        | -1.091 |        |  |  |        |        |        | EN.Only.Down.12H                 |
| CST6      |        | -1.39  |        |  |  |        |        |        | EN.Only.Down.12H                 |
| CYR1      |        | -2.102 |        |  |  |        |        |        | EN.Only.Down.12H                 |
| DAK       |        | -1.38  |        |  |  |        |        |        | EN.Only.Down.12H                 |
| DBNDD2    |        | -1.027 |        |  |  |        |        |        | EN.Only.Down.12H                 |
| DDX43     |        | -1.061 |        |  |  |        |        |        | EN.Only.Down.12H                 |
| DENND5B   |        | -1.002 |        |  |  |        |        |        | EN.Only.Down.12H                 |
| DEPDC5    |        | -1.301 |        |  |  |        |        |        | EN.Only.Down.12H                 |
| DHR53     |        | -1.063 |        |  |  |        |        |        | EN.Only.Down.12H                 |
| DHX40     |        | -1.077 |        |  |  |        |        |        | EN.Only.Down.12H                 |
| DNM3      |        | -1.419 |        |  |  |        |        |        | EN.Only.Down.12H                 |
| DPY19L1   |        | -1.429 |        |  |  |        |        |        | EN.Only.Down.12H                 |
| EFN1A     |        | -1.799 |        |  |  |        |        |        | EN.Only.Down.12H                 |
| EGLN3     |        | -1.971 |        |  |  |        |        |        | EN.Only.Down.12H                 |
| EHMT2     |        | -1.603 |        |  |  |        |        |        | EN.Only.Down.12H                 |
| EIF4EBP2  |        | -1.042 |        |  |  |        |        |        | EN.Only.Down.12H                 |
| EMP2      |        | -1.432 |        |  |  |        |        |        | EN.Only.Down.12H                 |
| EPHX4     |        | -1.946 |        |  |  |        |        |        | EN.Only.Down.12H                 |
| FBX08     |        | -1.367 |        |  |  |        |        |        | EN.Only.Down.12H                 |
| FECH      |        | -1.572 |        |  |  |        |        |        | EN.Only.Down.12H                 |
| FGF16     |        | -1.948 |        |  |  |        |        |        | EN.Only.Down.12H                 |
| FZD3      |        | -1.184 |        |  |  |        |        |        | EN.Only.Down.12H                 |
| GAL3ST3   |        | -1.056 |        |  |  |        |        |        | EN.Only.Down.12H                 |
| GALNTL2   |        | -2.418 |        |  |  |        |        |        | EN.Only.Down.12H                 |
| GATSL3    |        | -1.267 |        |  |  |        |        |        | EN.Only.Down.12H                 |
| GLTSCR2   |        | -1.063 |        |  |  |        |        |        | EN.Only.Down.12H                 |
| GNA14     |        | -1.673 |        |  |  |        |        |        | EN.Only.Down.12H                 |
| GRK4      |        | -1.654 |        |  |  |        |        |        | EN.Only.Down.12H                 |
| GSTM3     |        | -1.147 |        |  |  |        |        |        | EN.Only.Down.12H                 |
| HADH      |        | -1.074 |        |  |  |        |        |        | EN.Only.Down.12H                 |
| HDDC3     |        | -1.353 |        |  |  |        |        |        | EN.Only.Down.12H                 |
| HOXB7     |        | -2.335 |        |  |  |        |        |        | EN.Only.Down.12H                 |
| IDS       |        | -1.079 |        |  |  |        |        |        | EN.Only.Down.12H                 |
| IL6ST     |        | -1.232 |        |  |  |        |        |        | EN.Only.Down.12H                 |
| KATNAL1   |        | -1.809 |        |  |  |        |        |        | EN.Only.Down.12H                 |

|           |        |        |  |  |  |  |                  |
|-----------|--------|--------|--|--|--|--|------------------|
| KCNAB1    | -1.826 |        |  |  |  |  | EN.Only.Down.12H |
| LFR       | -1.629 |        |  |  |  |  | EN.Only.Down.12H |
| LXL1      | -1.004 |        |  |  |  |  | EN.Only.Down.12H |
| LOC475076 | -1.281 |        |  |  |  |  | EN.Only.Down.12H |
| LOC475343 | -1.024 |        |  |  |  |  | EN.Only.Down.12H |
| LOC476501 | -1.023 |        |  |  |  |  | EN.Only.Down.12H |
| LOC476569 | -1.684 |        |  |  |  |  | EN.Only.Down.12H |
| LOC478183 | -1.128 |        |  |  |  |  | EN.Only.Down.12H |
| LOC478894 | -1.409 |        |  |  |  |  | EN.Only.Down.12H |
| LOC478967 | -1.257 |        |  |  |  |  | EN.Only.Down.12H |
| LOC479477 | -1.015 |        |  |  |  |  | EN.Only.Down.12H |
| LOC485665 | -1.456 |        |  |  |  |  | EN.Only.Down.12H |
| LOC487047 | -1.086 |        |  |  |  |  | EN.Only.Down.12H |
| LOC487114 | -2.123 |        |  |  |  |  | EN.Only.Down.12H |
| LOC487992 | -1.693 |        |  |  |  |  | EN.Only.Down.12H |
| LOC490381 | -1.039 |        |  |  |  |  | EN.Only.Down.12H |
| LOC490458 | -1.35  |        |  |  |  |  | EN.Only.Down.12H |
| LOC490815 | -1.315 |        |  |  |  |  | EN.Only.Down.12H |
| LOC491005 | -1.539 |        |  |  |  |  | EN.Only.Down.12H |
| LOC491964 | -1.053 |        |  |  |  |  | EN.Only.Down.12H |
| LOC606939 | -1.551 |        |  |  |  |  | EN.Only.Down.12H |
| LOC608597 | -1.065 |        |  |  |  |  | EN.Only.Down.12H |
| LOC608733 | -1.66  |        |  |  |  |  | EN.Only.Down.12H |
| LOC608829 | -1.237 |        |  |  |  |  | EN.Only.Down.12H |
| LOC610526 | -1.389 |        |  |  |  |  | EN.Only.Down.12H |
| LOC611562 | -1.251 |        |  |  |  |  | EN.Only.Down.12H |
| LOC611631 | -1.258 |        |  |  |  |  | EN.Only.Down.12H |
| LOC612336 | -1.071 |        |  |  |  |  | EN.Only.Down.12H |
| LOC612721 | -1.63  |        |  |  |  |  | EN.Only.Down.12H |
| LPAR1     | -1.28  |        |  |  |  |  | EN.Only.Down.12H |
| LRP2BP    | -1.276 |        |  |  |  |  | EN.Only.Down.12H |
| LRRC70    | -2.424 |        |  |  |  |  | EN.Only.Down.12H |
| LYRM2     | -1.169 |        |  |  |  |  | EN.Only.Down.12H |
| MAP1A     | -1.103 |        |  |  |  |  | EN.Only.Down.12H |
| MAP3K1    | -2.172 |        |  |  |  |  | EN.Only.Down.12H |
| MED9      | -1.007 |        |  |  |  |  | EN.Only.Down.12H |
| MEIS1     | -1.143 |        |  |  |  |  | EN.Only.Down.12H |
| MKL2      | -1.864 |        |  |  |  |  | EN.Only.Down.12H |
| MYLIP     | -1.409 |        |  |  |  |  | EN.Only.Down.12H |
| NDUFAF3   | -1.159 |        |  |  |  |  | EN.Only.Down.12H |
| NEK4      | -1.021 |        |  |  |  |  | EN.Only.Down.12H |
| NFATS     | -1.315 |        |  |  |  |  | EN.Only.Down.12H |
| NFX1      | -1.063 |        |  |  |  |  | EN.Only.Down.12H |
| NISCH     | -1.063 |        |  |  |  |  | EN.Only.Down.12H |
| NPOC1     | -1.674 |        |  |  |  |  | EN.Only.Down.12H |
| NSL1      | -1.094 |        |  |  |  |  | EN.Only.Down.12H |
| OAZ2      | -1.274 |        |  |  |  |  | EN.Only.Down.12H |
| OFD1      | -1.266 |        |  |  |  |  | EN.Only.Down.12H |
| OGT       | -1.052 |        |  |  |  |  | EN.Only.Down.12H |
| OPTN      | -1.207 |        |  |  |  |  | EN.Only.Down.12H |
| OSBP16    | -1.439 |        |  |  |  |  | EN.Only.Down.12H |
| OSBP19    | -1.647 |        |  |  |  |  | EN.Only.Down.12H |
| PAPOLA    | -1.061 |        |  |  |  |  | EN.Only.Down.12H |
| PARP3     | -1.362 |        |  |  |  |  | EN.Only.Down.12H |
| PHF11     | -1.026 |        |  |  |  |  | EN.Only.Down.12H |
| PHF21A    | -1.029 |        |  |  |  |  | EN.Only.Down.12H |
| PLBD2     | -1.451 |        |  |  |  |  | EN.Only.Down.12H |
| PLD5      | -1.849 |        |  |  |  |  | EN.Only.Down.12H |
| PLXNB2    | -1.065 |        |  |  |  |  | EN.Only.Down.12H |
| PMH1      | -1.137 |        |  |  |  |  | EN.Only.Down.12H |
| PPFA2     | -1.063 |        |  |  |  |  | EN.Only.Down.12H |
| PRRX1     | -1.39  |        |  |  |  |  | EN.Only.Down.12H |
| RALGDS    | -1.68  |        |  |  |  |  | EN.Only.Down.12H |
| RB1CC1    | -1.201 |        |  |  |  |  | EN.Only.Down.12H |
| RBM26     | -1.098 |        |  |  |  |  | EN.Only.Down.12H |
| RFTN1     | -1.275 |        |  |  |  |  | EN.Only.Down.12H |
| RNF141    | -1.332 |        |  |  |  |  | EN.Only.Down.12H |
| RTP4      | -1.181 |        |  |  |  |  | EN.Only.Down.12H |
| SAMD11    | -1.983 |        |  |  |  |  | EN.Only.Down.12H |
| SCG5      | -1.778 |        |  |  |  |  | EN.Only.Down.12H |
| SDC2      | -1.434 |        |  |  |  |  | EN.Only.Down.12H |
| SDR42E1   | -3.014 |        |  |  |  |  | EN.Only.Down.12H |
| SERPING1  | -1.285 |        |  |  |  |  | EN.Only.Down.12H |
| SERPINI1  | -1.255 |        |  |  |  |  | EN.Only.Down.12H |
| SESTD1    | -1.08  |        |  |  |  |  | EN.Only.Down.12H |
| SIPAL11   | -1.112 |        |  |  |  |  | EN.Only.Down.12H |
| SLITRK4   | -1.63  |        |  |  |  |  | EN.Only.Down.12H |
| SMYD2     | -1.211 |        |  |  |  |  | EN.Only.Down.12H |
| SNTB2     | -1.03  |        |  |  |  |  | EN.Only.Down.12H |
| SPEF2     | -2.001 |        |  |  |  |  | EN.Only.Down.12H |
| STBS1A1   | -1.034 |        |  |  |  |  | EN.Only.Down.12H |
| TARBP1    | -1.04  |        |  |  |  |  | EN.Only.Down.12H |
| TBCE      | -1.675 |        |  |  |  |  | EN.Only.Down.12H |
| TCN       | -2.752 |        |  |  |  |  | EN.Only.Down.12H |
| TDSD3     | -1.225 |        |  |  |  |  | EN.Only.Down.12H |
| TEX14     | -1.759 |        |  |  |  |  | EN.Only.Down.12H |
| TEX2      | -1.24  |        |  |  |  |  | EN.Only.Down.12H |
| THAP10    | -1.807 |        |  |  |  |  | EN.Only.Down.12H |
| TLR3      | -1.337 |        |  |  |  |  | EN.Only.Down.12H |
| TMCC3     | -1.772 |        |  |  |  |  | EN.Only.Down.12H |
| TMEM134   | -1.136 |        |  |  |  |  | EN.Only.Down.12H |
| TMEM62    | -1.341 |        |  |  |  |  | EN.Only.Down.12H |
| TROD      | -1.091 |        |  |  |  |  | EN.Only.Down.12H |
| TTC28     | -2.145 |        |  |  |  |  | EN.Only.Down.12H |
| TTC7B     | -1.01  |        |  |  |  |  | EN.Only.Down.12H |
| UEVLD     | -1.565 |        |  |  |  |  | EN.Only.Down.12H |
| VNN1      | -1.067 |        |  |  |  |  | EN.Only.Down.12H |
| VPS13A    | -1.178 |        |  |  |  |  | EN.Only.Down.12H |
| VWF       | -1.124 |        |  |  |  |  | EN.Only.Down.12H |
| WDR48     | -1.605 |        |  |  |  |  | EN.Only.Down.12H |
| WWP1      | -1.399 |        |  |  |  |  | EN.Only.Down.12H |
| ZKSCAN5   | -1.138 |        |  |  |  |  | EN.Only.Down.12H |
| ZMYM2     | -1.352 |        |  |  |  |  | EN.Only.Down.12H |
| ZMYND11   | -1.001 |        |  |  |  |  | EN.Only.Down.12H |
| ZNF292    | -1.219 |        |  |  |  |  | EN.Only.Down.12H |
| ZNF33A    | -1.537 |        |  |  |  |  | EN.Only.Down.12H |
| ZNF362    | -1.07  |        |  |  |  |  | EN.Only.Down.12H |
| ZNF404    | -1.615 |        |  |  |  |  | EN.Only.Down.12H |
| ZNF521    | -1.503 |        |  |  |  |  | EN.Only.Down.12H |
| ZNF726    | -1.729 |        |  |  |  |  | EN.Only.Down.12H |
| ZNF827    | -1.015 |        |  |  |  |  | EN.Only.Down.12H |
| ABC1      |        | -1.04  |  |  |  |  | EN.Only.Down.24H |
| ABLIM2    |        | -1.079 |  |  |  |  | EN.Only.Down.24H |
| ACVR1     |        | -1.317 |  |  |  |  | EN.Only.Down.24H |
| ADAMTSS   |        | -2.262 |  |  |  |  | EN.Only.Down.24H |
| ADRA2A    |        | -1.068 |  |  |  |  | EN.Only.Down.24H |
| ADRA2C    |        | -1.073 |  |  |  |  | EN.Only.Down.24H |
| ARL9      |        | -1.443 |  |  |  |  | EN.Only.Down.24H |
| ATP1B1    |        | -1.226 |  |  |  |  | EN.Only.Down.24H |
| AVP1      |        | -1.262 |  |  |  |  | EN.Only.Down.24H |
| B4GALT6   |        | -1.141 |  |  |  |  | EN.Only.Down.24H |
| CBLB      |        | -1.4   |  |  |  |  | EN.Only.Down.24H |
| CCR6      |        | -1.005 |  |  |  |  | EN.Only.Down.24H |

|           |        |  |        |  |  |        |  |  |                  |
|-----------|--------|--|--------|--|--|--------|--|--|------------------|
| CHST12    |        |  | -1.446 |  |  |        |  |  | EN.Only.Down.24H |
| COPG2     |        |  | -1.081 |  |  |        |  |  | EN.Only.Down.24H |
| COR51C4   |        |  | -2.728 |  |  |        |  |  | EN.Only.Down.24H |
| CTSE      |        |  | -2.095 |  |  |        |  |  | EN.Only.Down.24H |
| CYP11B11  |        |  | -1.048 |  |  |        |  |  | EN.Only.Down.24H |
| DCAF4     |        |  | -1.289 |  |  |        |  |  | EN.Only.Down.24H |
| ECE1      |        |  | -1.173 |  |  |        |  |  | EN.Only.Down.24H |
| EFCAB3    |        |  | -2.616 |  |  |        |  |  | EN.Only.Down.24H |
| EFCAB9    |        |  | -1.986 |  |  |        |  |  | EN.Only.Down.24H |
| EFNB2     |        |  | -1.01  |  |  |        |  |  | EN.Only.Down.24H |
| ELSPBP1   |        |  | -1.222 |  |  |        |  |  | EN.Only.Down.24H |
| FRK07     |        |  | -1.202 |  |  |        |  |  | EN.Only.Down.24H |
| GPL124    |        |  | -1.284 |  |  |        |  |  | EN.Only.Down.24H |
| LOC474456 |        |  | -1.665 |  |  |        |  |  | EN.Only.Down.24H |
| LOC481567 |        |  | -1.831 |  |  |        |  |  | EN.Only.Down.24H |
| LOC482849 |        |  | -1.32  |  |  |        |  |  | EN.Only.Down.24H |
| LOC488758 |        |  | -1.184 |  |  |        |  |  | EN.Only.Down.24H |
| LOC491035 |        |  | -1.428 |  |  |        |  |  | EN.Only.Down.24H |
| LOC612235 |        |  | -1.584 |  |  |        |  |  | EN.Only.Down.24H |
| LRRTM1    |        |  | -1.263 |  |  |        |  |  | EN.Only.Down.24H |
| LTBP2     |        |  | -2.018 |  |  |        |  |  | EN.Only.Down.24H |
| LYSMD2    |        |  | -1.447 |  |  |        |  |  | EN.Only.Down.24H |
| MAOA      |        |  | -1.138 |  |  |        |  |  | EN.Only.Down.24H |
| MAP6      |        |  | -1.839 |  |  |        |  |  | EN.Only.Down.24H |
| MARK4     |        |  | -1.614 |  |  |        |  |  | EN.Only.Down.24H |
| MSRB2     |        |  | -1.081 |  |  |        |  |  | EN.Only.Down.24H |
| MSTO1     |        |  | -1.206 |  |  |        |  |  | EN.Only.Down.24H |
| MYBL1     |        |  | -1.898 |  |  |        |  |  | EN.Only.Down.24H |
| OCLN      |        |  | -1.958 |  |  |        |  |  | EN.Only.Down.24H |
| OLFM12A   |        |  | -1.772 |  |  |        |  |  | EN.Only.Down.24H |
| PCDHGA4   |        |  | -2.14  |  |  |        |  |  | EN.Only.Down.24H |
| PHF17     |        |  | -1.066 |  |  |        |  |  | EN.Only.Down.24H |
| PPP1R13L  |        |  | -1.263 |  |  |        |  |  | EN.Only.Down.24H |
| PRPF40B   |        |  | -1.99  |  |  |        |  |  | EN.Only.Down.24H |
| PTRRR     |        |  | -1.775 |  |  |        |  |  | EN.Only.Down.24H |
| RBL1      |        |  | -1.287 |  |  |        |  |  | EN.Only.Down.24H |
| SCN2A     |        |  | -1.789 |  |  |        |  |  | EN.Only.Down.24H |
| SFT2D2    |        |  | -1.588 |  |  |        |  |  | EN.Only.Down.24H |
| SLC25A21  |        |  | -1.211 |  |  |        |  |  | EN.Only.Down.24H |
| SLC35F1   |        |  | -2.633 |  |  |        |  |  | EN.Only.Down.24H |
| SOD1      |        |  | -1.068 |  |  |        |  |  | EN.Only.Down.24H |
| SSH1      |        |  | -1.255 |  |  |        |  |  | EN.Only.Down.24H |
| SSX2IP    |        |  | -1.099 |  |  |        |  |  | EN.Only.Down.24H |
| TAF9B     |        |  | -1.271 |  |  |        |  |  | EN.Only.Down.24H |
| TRIB2     |        |  | -1.709 |  |  |        |  |  | EN.Only.Down.24H |
| UBXN7     |        |  | -1.276 |  |  |        |  |  | EN.Only.Down.24H |
| ZBTB8B    |        |  | -1.318 |  |  |        |  |  | EN.Only.Down.24H |
| ZMYM4     |        |  | -1.246 |  |  |        |  |  | EN.Only.Down.24H |
| ZNF197    |        |  | -1.389 |  |  |        |  |  | EN.Only.Down.24H |
| ATXN2L    | -1.73  |  |        |  |  |        |  |  | EN.Only.Down.2H  |
| BAT4      | -1.192 |  |        |  |  |        |  |  | EN.Only.Down.2H  |
| CCDC32    | -2.066 |  |        |  |  |        |  |  | EN.Only.Down.2H  |
| LOC479815 | -2.743 |  |        |  |  |        |  |  | EN.Only.Down.2H  |
| LOC491116 | -1.293 |  |        |  |  |        |  |  | EN.Only.Down.2H  |
| MITD1     | -2.246 |  |        |  |  |        |  |  | EN.Only.Down.2H  |
| MTRR      | -3.189 |  |        |  |  |        |  |  | EN.Only.Down.2H  |
| VPS25     | -1.674 |  |        |  |  |        |  |  | EN.Only.Down.2H  |
| ANXA3     |        |  | -1.017 |  |  |        |  |  | EN.Only.Down.7D  |
| ARRHGAP15 |        |  | -1.625 |  |  |        |  |  | EN.Only.Down.7D  |
| ASS1      |        |  | -1.572 |  |  |        |  |  | EN.Only.Down.7D  |
| ASTN2     |        |  | -2.248 |  |  |        |  |  | EN.Only.Down.7D  |
| ATP11B    |        |  | -1.035 |  |  |        |  |  | EN.Only.Down.7D  |
| BCORL1    |        |  | -1.11  |  |  |        |  |  | EN.Only.Down.7D  |
| CAPS2     |        |  | -1.426 |  |  |        |  |  | EN.Only.Down.7D  |
| CCDC68    |        |  | -2.068 |  |  |        |  |  | EN.Only.Down.7D  |
| CDC42BPA  |        |  | -1.678 |  |  |        |  |  | EN.Only.Down.7D  |
| CLCN1     |        |  | -1.224 |  |  |        |  |  | EN.Only.Down.7D  |
| CWF19L2   |        |  | -1.548 |  |  |        |  |  | EN.Only.Down.7D  |
| CXCR7     |        |  | -2.108 |  |  |        |  |  | EN.Only.Down.7D  |
| FLUNC2    |        |  | -1.126 |  |  |        |  |  | EN.Only.Down.7D  |
| FXVD2     |        |  | -1.613 |  |  |        |  |  | EN.Only.Down.7D  |
| GIPC1     |        |  | -1.365 |  |  |        |  |  | EN.Only.Down.7D  |
| GPATCH1   |        |  | -1.26  |  |  |        |  |  | EN.Only.Down.7D  |
| GTPBP5    |        |  | -1.48  |  |  |        |  |  | EN.Only.Down.7D  |
| GTPBP8    |        |  | -1.093 |  |  |        |  |  | EN.Only.Down.7D  |
| HQDK1     |        |  | -1.139 |  |  |        |  |  | EN.Only.Down.7D  |
| IFT57     |        |  | -1.019 |  |  |        |  |  | EN.Only.Down.7D  |
| ILIRAP1L  |        |  | -1.059 |  |  |        |  |  | EN.Only.Down.7D  |
| KCNK16    |        |  | -1.08  |  |  |        |  |  | EN.Only.Down.7D  |
| KLHL31    |        |  | -1.633 |  |  |        |  |  | EN.Only.Down.7D  |
| LOC475003 |        |  | -1.014 |  |  |        |  |  | EN.Only.Down.7D  |
| LOC477862 |        |  | -1.535 |  |  |        |  |  | EN.Only.Down.7D  |
| LOC480155 |        |  | -1.037 |  |  |        |  |  | EN.Only.Down.7D  |
| LOC480785 |        |  | -1.397 |  |  |        |  |  | EN.Only.Down.7D  |
| LOC484412 |        |  | -1.013 |  |  |        |  |  | EN.Only.Down.7D  |
| LOC487697 |        |  | -1.132 |  |  |        |  |  | EN.Only.Down.7D  |
| LOC609263 |        |  | -1.27  |  |  |        |  |  | EN.Only.Down.7D  |
| LOC609833 |        |  | -1.065 |  |  |        |  |  | EN.Only.Down.7D  |
| LOC610934 |        |  | -1.809 |  |  |        |  |  | EN.Only.Down.7D  |
| MMP23A    |        |  | -2.283 |  |  |        |  |  | EN.Only.Down.7D  |
| MTMR11    |        |  | -1.276 |  |  |        |  |  | EN.Only.Down.7D  |
| NR3C1     |        |  | -1.08  |  |  |        |  |  | EN.Only.Down.7D  |
| PPAP2B    |        |  | -1.133 |  |  |        |  |  | EN.Only.Down.7D  |
| PSEN2     |        |  | -1.684 |  |  |        |  |  | EN.Only.Down.7D  |
| PYGL      |        |  | -1.069 |  |  |        |  |  | EN.Only.Down.7D  |
| RAB11FIP2 |        |  | -1.14  |  |  |        |  |  | EN.Only.Down.7D  |
| RASEF     |        |  | -1.418 |  |  |        |  |  | EN.Only.Down.7D  |
| RG9MTD2   |        |  | -1.144 |  |  |        |  |  | EN.Only.Down.7D  |
| RPRD1A    |        |  | -1.068 |  |  |        |  |  | EN.Only.Down.7D  |
| SLC44A3   |        |  | -1.123 |  |  |        |  |  | EN.Only.Down.7D  |
| TMEM56    |        |  | -1.264 |  |  |        |  |  | EN.Only.Down.7D  |
| TOMM6     |        |  | -1.058 |  |  |        |  |  | EN.Only.Down.7D  |
| TRIM23    |        |  | -1.292 |  |  |        |  |  | EN.Only.Down.7D  |
| UPF3A     |        |  | -1.254 |  |  |        |  |  | EN.Only.Down.7D  |
| ZBTB8A    |        |  | -1.032 |  |  |        |  |  | EN.Only.Down.7D  |
| ZFP37     |        |  | -1.614 |  |  |        |  |  | EN.Only.Down.7D  |
| ZNF287    |        |  | -1.169 |  |  |        |  |  | EN.Only.Down.7D  |
| ZNF471    |        |  | -1.433 |  |  |        |  |  | EN.Only.Down.7D  |
| ZNF678    |        |  | -1.66  |  |  |        |  |  | EN.Only.Down.7D  |
| ZNF790    |        |  | -1.013 |  |  |        |  |  | EN.Only.Down.7D  |
| 8-Sep     |        |  |        |  |  | -1.461 |  |  | SM.Only.Down.12H |
| AASS      |        |  |        |  |  | -1.232 |  |  | SM.Only.Down.12H |
| ABC6      |        |  |        |  |  | -1.159 |  |  | SM.Only.Down.12H |
| ABCD2     |        |  |        |  |  | -1.595 |  |  | SM.Only.Down.12H |
| ABI3BP    |        |  |        |  |  | -1.342 |  |  | SM.Only.Down.12H |
| ACTN8     |        |  |        |  |  | -1.326 |  |  | SM.Only.Down.12H |
| ADAMDEC1  |        |  |        |  |  | -2.662 |  |  | SM.Only.Down.12H |
| ADAMTS20  |        |  |        |  |  | -1.186 |  |  | SM.Only.Down.12H |
| ADAMTS6   |        |  |        |  |  | -1.698 |  |  | SM.Only.Down.12H |
| Adcy6     |        |  |        |  |  | -1.065 |  |  | SM.Only.Down.12H |
| AES       |        |  |        |  |  | -1.08  |  |  | SM.Only.Down.12H |
| AGA       |        |  |        |  |  | -1.065 |  |  | SM.Only.Down.12H |
| AGAP1     |        |  |        |  |  | -1.318 |  |  | SM.Only.Down.12H |

|           |  |  |  |  |  |        |  |  |  |                  |
|-----------|--|--|--|--|--|--------|--|--|--|------------------|
| AGL       |  |  |  |  |  | -1.311 |  |  |  | SM.Only.Down.12H |
| ALAD      |  |  |  |  |  | -1.38  |  |  |  | SM.Only.Down.12H |
| ALDH2     |  |  |  |  |  | -1.17  |  |  |  | SM.Only.Down.12H |
| ALOX12    |  |  |  |  |  | -1.013 |  |  |  | SM.Only.Down.12H |
| ALS2CL    |  |  |  |  |  | -1.015 |  |  |  | SM.Only.Down.12H |
| ANKRD29   |  |  |  |  |  | -1.079 |  |  |  | SM.Only.Down.12H |
| ANP32A    |  |  |  |  |  | -1.189 |  |  |  | SM.Only.Down.12H |
| ANXA9     |  |  |  |  |  | -2.233 |  |  |  | SM.Only.Down.12H |
| APLF      |  |  |  |  |  | -1.039 |  |  |  | SM.Only.Down.12H |
| APPL1     |  |  |  |  |  | -1.118 |  |  |  | SM.Only.Down.12H |
| AQP4      |  |  |  |  |  | -1.474 |  |  |  | SM.Only.Down.12H |
| ARRHGAP18 |  |  |  |  |  | -1.072 |  |  |  | SM.Only.Down.12H |
| ARL2      |  |  |  |  |  | -1.059 |  |  |  | SM.Only.Down.12H |
| ARSA      |  |  |  |  |  | -1.082 |  |  |  | SM.Only.Down.12H |
| ASMTL     |  |  |  |  |  | -1.103 |  |  |  | SM.Only.Down.12H |
| ATF7IP    |  |  |  |  |  | -1.179 |  |  |  | SM.Only.Down.12H |
| ATG16L2   |  |  |  |  |  | -1.695 |  |  |  | SM.Only.Down.12H |
| ATL3      |  |  |  |  |  | -1.049 |  |  |  | SM.Only.Down.12H |
| ATPB04    |  |  |  |  |  | -1.069 |  |  |  | SM.Only.Down.12H |
| ATP6D1    |  |  |  |  |  | -1.175 |  |  |  | SM.Only.Down.12H |
| BCAR3     |  |  |  |  |  | -1.224 |  |  |  | SM.Only.Down.12H |
| BCKDHB    |  |  |  |  |  | -1.305 |  |  |  | SM.Only.Down.12H |
| BICD2     |  |  |  |  |  | -1.003 |  |  |  | SM.Only.Down.12H |
| BPHL      |  |  |  |  |  | -1.399 |  |  |  | SM.Only.Down.12H |
| BRMS1L    |  |  |  |  |  | -1.032 |  |  |  | SM.Only.Down.12H |
| BTBD6     |  |  |  |  |  | -1.037 |  |  |  | SM.Only.Down.12H |
| BTBD8     |  |  |  |  |  | -1.328 |  |  |  | SM.Only.Down.12H |
| CASB      |  |  |  |  |  | -1.1   |  |  |  | SM.Only.Down.12H |
| CAV1      |  |  |  |  |  | -1.252 |  |  |  | SM.Only.Down.12H |
| CCDC110   |  |  |  |  |  | -1.148 |  |  |  | SM.Only.Down.12H |
| CCDC112   |  |  |  |  |  | -1.279 |  |  |  | SM.Only.Down.12H |
| CCDC115   |  |  |  |  |  | -1.024 |  |  |  | SM.Only.Down.12H |
| CCDC148   |  |  |  |  |  | -1.645 |  |  |  | SM.Only.Down.12H |
| CCDC34    |  |  |  |  |  | -1.084 |  |  |  | SM.Only.Down.12H |
| CCDC50    |  |  |  |  |  | -1.217 |  |  |  | SM.Only.Down.12H |
| CCDC77    |  |  |  |  |  | -1.829 |  |  |  | SM.Only.Down.12H |
| CCDC91    |  |  |  |  |  | -1.091 |  |  |  | SM.Only.Down.12H |
| CCNA1     |  |  |  |  |  | -1.05  |  |  |  | SM.Only.Down.12H |
| CDH13     |  |  |  |  |  | -1.093 |  |  |  | SM.Only.Down.12H |
| CDKL3     |  |  |  |  |  | -1.395 |  |  |  | SM.Only.Down.12H |
| CENPM     |  |  |  |  |  | -1.679 |  |  |  | SM.Only.Down.12H |
| CEP290    |  |  |  |  |  | -1.121 |  |  |  | SM.Only.Down.12H |
| CETN3     |  |  |  |  |  | -1.344 |  |  |  | SM.Only.Down.12H |
| CF2       |  |  |  |  |  | -1.08  |  |  |  | SM.Only.Down.12H |
| CITED1    |  |  |  |  |  | -1.114 |  |  |  | SM.Only.Down.12H |
| CLUAP1    |  |  |  |  |  | -1.453 |  |  |  | SM.Only.Down.12H |
| CMA5      |  |  |  |  |  | -1.225 |  |  |  | SM.Only.Down.12H |
| CNKR2     |  |  |  |  |  | -1.364 |  |  |  | SM.Only.Down.12H |
| COL4A4    |  |  |  |  |  | -1.183 |  |  |  | SM.Only.Down.12H |
| COMMD3    |  |  |  |  |  | -1.033 |  |  |  | SM.Only.Down.12H |
| CORO1B    |  |  |  |  |  | -1.005 |  |  |  | SM.Only.Down.12H |
| CPEB4     |  |  |  |  |  | -1.607 |  |  |  | SM.Only.Down.12H |
| CPNE2     |  |  |  |  |  | -1.362 |  |  |  | SM.Only.Down.12H |
| CPVL      |  |  |  |  |  | -1.352 |  |  |  | SM.Only.Down.12H |
| CRY2L1    |  |  |  |  |  | -1.038 |  |  |  | SM.Only.Down.12H |
| CYB5R3    |  |  |  |  |  | -1.327 |  |  |  | SM.Only.Down.12H |
| DAB2IP    |  |  |  |  |  | -1.226 |  |  |  | SM.Only.Down.12H |
| DCLRE1A   |  |  |  |  |  | -1.154 |  |  |  | SM.Only.Down.12H |
| DDIT4L    |  |  |  |  |  | -2.47  |  |  |  | SM.Only.Down.12H |
| DDO       |  |  |  |  |  | -1.25  |  |  |  | SM.Only.Down.12H |
| DHRS1     |  |  |  |  |  | -1.119 |  |  |  | SM.Only.Down.12H |
| DHTKD1    |  |  |  |  |  | -1.57  |  |  |  | SM.Only.Down.12H |
| DNAH3     |  |  |  |  |  | -1.013 |  |  |  | SM.Only.Down.12H |
| DSEL      |  |  |  |  |  | -1.065 |  |  |  | SM.Only.Down.12H |
| DSPP      |  |  |  |  |  | -2.178 |  |  |  | SM.Only.Down.12H |
| DSTN      |  |  |  |  |  | -1.213 |  |  |  | SM.Only.Down.12H |
| DTD1      |  |  |  |  |  | -1.175 |  |  |  | SM.Only.Down.12H |
| ECEL1     |  |  |  |  |  | -1.078 |  |  |  | SM.Only.Down.12H |
| ECH1      |  |  |  |  |  | -1.33  |  |  |  | SM.Only.Down.12H |
| EEF2K     |  |  |  |  |  | -1.211 |  |  |  | SM.Only.Down.12H |
| EFCA87    |  |  |  |  |  | -1.68  |  |  |  | SM.Only.Down.12H |
| EFEMP1    |  |  |  |  |  | -2.371 |  |  |  | SM.Only.Down.12H |
| EFNA5     |  |  |  |  |  | -1.296 |  |  |  | SM.Only.Down.12H |
| ELMOD1    |  |  |  |  |  | -1.036 |  |  |  | SM.Only.Down.12H |
| ELMOD2    |  |  |  |  |  | -1.225 |  |  |  | SM.Only.Down.12H |
| EPH6      |  |  |  |  |  | -1.639 |  |  |  | SM.Only.Down.12H |
| FABP9     |  |  |  |  |  | -1.118 |  |  |  | SM.Only.Down.12H |
| FARP1     |  |  |  |  |  | -1.421 |  |  |  | SM.Only.Down.12H |
| FBXO17    |  |  |  |  |  | -1.11  |  |  |  | SM.Only.Down.12H |
| FDFT1     |  |  |  |  |  | -1.345 |  |  |  | SM.Only.Down.12H |
| FIS1      |  |  |  |  |  | -1.262 |  |  |  | SM.Only.Down.12H |
| FM05      |  |  |  |  |  | -2.062 |  |  |  | SM.Only.Down.12H |
| FOXN3     |  |  |  |  |  | -1.305 |  |  |  | SM.Only.Down.12H |
| FREM2     |  |  |  |  |  | -1.627 |  |  |  | SM.Only.Down.12H |
| FZD4      |  |  |  |  |  | -1.23  |  |  |  | SM.Only.Down.12H |
| FZD5      |  |  |  |  |  | -1.078 |  |  |  | SM.Only.Down.12H |
| GAL       |  |  |  |  |  | -1.209 |  |  |  | SM.Only.Down.12H |
| GALNT12   |  |  |  |  |  | -1.27  |  |  |  | SM.Only.Down.12H |
| GAS8      |  |  |  |  |  | -1.5   |  |  |  | SM.Only.Down.12H |
| GBAS      |  |  |  |  |  | -1.145 |  |  |  | SM.Only.Down.12H |
| GKAP1     |  |  |  |  |  | -1.246 |  |  |  | SM.Only.Down.12H |
| GMPR      |  |  |  |  |  | -2.17  |  |  |  | SM.Only.Down.12H |
| GNAL      |  |  |  |  |  | -1.543 |  |  |  | SM.Only.Down.12H |
| GNB4      |  |  |  |  |  | -1.118 |  |  |  | SM.Only.Down.12H |
| GNPDA2    |  |  |  |  |  | -1.025 |  |  |  | SM.Only.Down.12H |
| GPC4      |  |  |  |  |  | -1.021 |  |  |  | SM.Only.Down.12H |
| GPS1L     |  |  |  |  |  | -1.196 |  |  |  | SM.Only.Down.12H |
| GPR155    |  |  |  |  |  | -1.025 |  |  |  | SM.Only.Down.12H |
| GRB14     |  |  |  |  |  | -1.251 |  |  |  | SM.Only.Down.12H |
| GTPC      |  |  |  |  |  | -1.296 |  |  |  | SM.Only.Down.12H |
| HCFC1R1   |  |  |  |  |  | -1.095 |  |  |  | SM.Only.Down.12H |
| HELZ      |  |  |  |  |  | -1.153 |  |  |  | SM.Only.Down.12H |
| HIF3A     |  |  |  |  |  | -1.244 |  |  |  | SM.Only.Down.12H |
| HNMT      |  |  |  |  |  | -1.252 |  |  |  | SM.Only.Down.12H |
| HNRPLL    |  |  |  |  |  | -1.194 |  |  |  | SM.Only.Down.12H |
| HOXA13    |  |  |  |  |  | -1.902 |  |  |  | SM.Only.Down.12H |
| HOXC4     |  |  |  |  |  | -1.059 |  |  |  | SM.Only.Down.12H |
| HOXD10    |  |  |  |  |  | -1.468 |  |  |  | SM.Only.Down.12H |
| HRASL55   |  |  |  |  |  | -1.157 |  |  |  | SM.Only.Down.12H |
| HSD17B11  |  |  |  |  |  | -1.182 |  |  |  | SM.Only.Down.12H |
| HSD17B14  |  |  |  |  |  | -1.878 |  |  |  | SM.Only.Down.12H |
| HSPA1L    |  |  |  |  |  | -1.046 |  |  |  | SM.Only.Down.12H |
| HSPB3     |  |  |  |  |  | -1.359 |  |  |  | SM.Only.Down.12H |
| HTR1E     |  |  |  |  |  | -3.214 |  |  |  | SM.Only.Down.12H |
| IDH3G     |  |  |  |  |  | -1.174 |  |  |  | SM.Only.Down.12H |
| IFTB1     |  |  |  |  |  | -1.374 |  |  |  | SM.Only.Down.12H |
| IGSF11    |  |  |  |  |  | -1.798 |  |  |  | SM.Only.Down.12H |
| INMT      |  |  |  |  |  | -1.007 |  |  |  | SM.Only.Down.12H |
| INPP4A    |  |  |  |  |  | -1.373 |  |  |  | SM.Only.Down.12H |
| INPP5F    |  |  |  |  |  | -1.082 |  |  |  | SM.Only.Down.12H |
| IQCB1     |  |  |  |  |  | -1.303 |  |  |  | SM.Only.Down.12H |
| IQCF1     |  |  |  |  |  | -1.096 |  |  |  | SM.Only.Down.12H |
| IRS1      |  |  |  |  |  | -1.049 |  |  |  | SM.Only.Down.12H |

|           |  |  |  |  |  |        |  |  |                  |
|-----------|--|--|--|--|--|--------|--|--|------------------|
| ITFG1     |  |  |  |  |  | -1.121 |  |  | SM.Only.Down.12H |
| ITGBL1    |  |  |  |  |  | -1.185 |  |  | SM.Only.Down.12H |
| IVD       |  |  |  |  |  | -1.072 |  |  | SM.Only.Down.12H |
| JAN3      |  |  |  |  |  | -1.301 |  |  | SM.Only.Down.12H |
| KCTD1     |  |  |  |  |  | -1.115 |  |  | SM.Only.Down.12H |
| KCTD9     |  |  |  |  |  | -1.055 |  |  | SM.Only.Down.12H |
| KIF13A    |  |  |  |  |  | -1.232 |  |  | SM.Only.Down.12H |
| KIF13B    |  |  |  |  |  | -1.206 |  |  | SM.Only.Down.12H |
| KIF22     |  |  |  |  |  | -1.201 |  |  | SM.Only.Down.12H |
| KLHDC5    |  |  |  |  |  | -1.268 |  |  | SM.Only.Down.12H |
| KLHL8     |  |  |  |  |  | -1.145 |  |  | SM.Only.Down.12H |
| KRT27     |  |  |  |  |  | -1.027 |  |  | SM.Only.Down.12H |
| KRT32     |  |  |  |  |  | -1.064 |  |  | SM.Only.Down.12H |
| KRTR      |  |  |  |  |  | -1.619 |  |  | SM.Only.Down.12H |
| L2HGDH    |  |  |  |  |  | -2.098 |  |  | SM.Only.Down.12H |
| LANCL1    |  |  |  |  |  | -1.43  |  |  | SM.Only.Down.12H |
| LARP6     |  |  |  |  |  | -1.018 |  |  | SM.Only.Down.12H |
| LATS1     |  |  |  |  |  | -1.043 |  |  | SM.Only.Down.12H |
| LCAT      |  |  |  |  |  | -1.145 |  |  | SM.Only.Down.12H |
| LDB1      |  |  |  |  |  | -1.162 |  |  | SM.Only.Down.12H |
| LGR4      |  |  |  |  |  | -1.24  |  |  | SM.Only.Down.12H |
| LIPA      |  |  |  |  |  | -1.068 |  |  | SM.Only.Down.12H |
| LNPEP     |  |  |  |  |  | -1.13  |  |  | SM.Only.Down.12H |
| LOC403446 |  |  |  |  |  | -1.339 |  |  | SM.Only.Down.12H |
| LOC474447 |  |  |  |  |  | -1.969 |  |  | SM.Only.Down.12H |
| LOC474640 |  |  |  |  |  | -1.134 |  |  | SM.Only.Down.12H |
| LOC475673 |  |  |  |  |  | -1.579 |  |  | SM.Only.Down.12H |
| LOC475685 |  |  |  |  |  | -1.347 |  |  | SM.Only.Down.12H |
| LOC475941 |  |  |  |  |  | -1.095 |  |  | SM.Only.Down.12H |
| LOC475952 |  |  |  |  |  | -1.343 |  |  | SM.Only.Down.12H |
| LOC476113 |  |  |  |  |  | -1.755 |  |  | SM.Only.Down.12H |
| LOC477486 |  |  |  |  |  | -1.287 |  |  | SM.Only.Down.12H |
| LOC477555 |  |  |  |  |  | -1.499 |  |  | SM.Only.Down.12H |
| LOC477569 |  |  |  |  |  | -1.103 |  |  | SM.Only.Down.12H |
| LOC477905 |  |  |  |  |  | -1.69  |  |  | SM.Only.Down.12H |
| LOC478326 |  |  |  |  |  | -1.284 |  |  | SM.Only.Down.12H |
| LOC478639 |  |  |  |  |  | -1.101 |  |  | SM.Only.Down.12H |
| LOC479151 |  |  |  |  |  | -1.764 |  |  | SM.Only.Down.12H |
| LOC479261 |  |  |  |  |  | -1.753 |  |  | SM.Only.Down.12H |
| LOC479416 |  |  |  |  |  | -1.308 |  |  | SM.Only.Down.12H |
| LOC479461 |  |  |  |  |  | -1.983 |  |  | SM.Only.Down.12H |
| LOC480099 |  |  |  |  |  | -1.065 |  |  | SM.Only.Down.12H |
| LOC480617 |  |  |  |  |  | -1.134 |  |  | SM.Only.Down.12H |
| LOC480670 |  |  |  |  |  | -1.001 |  |  | SM.Only.Down.12H |
| LOC481143 |  |  |  |  |  | -1.326 |  |  | SM.Only.Down.12H |
| LOC481152 |  |  |  |  |  | -1.522 |  |  | SM.Only.Down.12H |
| LOC481249 |  |  |  |  |  | -1.083 |  |  | SM.Only.Down.12H |
| LOC481315 |  |  |  |  |  | -1.617 |  |  | SM.Only.Down.12H |
| LOC481674 |  |  |  |  |  | -1.642 |  |  | SM.Only.Down.12H |
| LOC481825 |  |  |  |  |  | -1.039 |  |  | SM.Only.Down.12H |
| LOC481962 |  |  |  |  |  | -1.629 |  |  | SM.Only.Down.12H |
| LOC482590 |  |  |  |  |  | -1.098 |  |  | SM.Only.Down.12H |
| LOC483182 |  |  |  |  |  | -1.115 |  |  | SM.Only.Down.12H |
| LOC483188 |  |  |  |  |  | -1.123 |  |  | SM.Only.Down.12H |
| LOC483447 |  |  |  |  |  | -2.112 |  |  | SM.Only.Down.12H |
| LOC484172 |  |  |  |  |  | -1.213 |  |  | SM.Only.Down.12H |
| LOC485274 |  |  |  |  |  | -1.093 |  |  | SM.Only.Down.12H |
| LOC485375 |  |  |  |  |  | -1.946 |  |  | SM.Only.Down.12H |
| LOC486500 |  |  |  |  |  | -1.088 |  |  | SM.Only.Down.12H |
| LOC487095 |  |  |  |  |  | -2.957 |  |  | SM.Only.Down.12H |
| LOC487854 |  |  |  |  |  | -1.144 |  |  | SM.Only.Down.12H |
| LOC488576 |  |  |  |  |  | -1.226 |  |  | SM.Only.Down.12H |
| LOC488680 |  |  |  |  |  | -1.306 |  |  | SM.Only.Down.12H |
| LOC489283 |  |  |  |  |  | -1.309 |  |  | SM.Only.Down.12H |
| LOC490496 |  |  |  |  |  | -1.639 |  |  | SM.Only.Down.12H |
| LOC490814 |  |  |  |  |  | -1.843 |  |  | SM.Only.Down.12H |
| LOC490941 |  |  |  |  |  | -1.251 |  |  | SM.Only.Down.12H |
| LOC491385 |  |  |  |  |  | -1.04  |  |  | SM.Only.Down.12H |
| LOC607235 |  |  |  |  |  | -1.388 |  |  | SM.Only.Down.12H |
| LOC607322 |  |  |  |  |  | -1.462 |  |  | SM.Only.Down.12H |
| LOC607417 |  |  |  |  |  | -1.218 |  |  | SM.Only.Down.12H |
| LOC607485 |  |  |  |  |  | -1.087 |  |  | SM.Only.Down.12H |
| LOC608029 |  |  |  |  |  | -1.437 |  |  | SM.Only.Down.12H |
| LOC608130 |  |  |  |  |  | -2.295 |  |  | SM.Only.Down.12H |
| LOC608134 |  |  |  |  |  | -1.084 |  |  | SM.Only.Down.12H |
| LOC608406 |  |  |  |  |  | -1.21  |  |  | SM.Only.Down.12H |
| LOC608676 |  |  |  |  |  | -1.447 |  |  | SM.Only.Down.12H |
| LOC609015 |  |  |  |  |  | -1.334 |  |  | SM.Only.Down.12H |
| LOC609071 |  |  |  |  |  | -1.15  |  |  | SM.Only.Down.12H |
| LOC609433 |  |  |  |  |  | -2.026 |  |  | SM.Only.Down.12H |
| LOC609451 |  |  |  |  |  | -1.096 |  |  | SM.Only.Down.12H |
| LOC609535 |  |  |  |  |  | -1.011 |  |  | SM.Only.Down.12H |
| LOC609559 |  |  |  |  |  | -1.203 |  |  | SM.Only.Down.12H |
| LOC609736 |  |  |  |  |  | -1.052 |  |  | SM.Only.Down.12H |
| LOC610183 |  |  |  |  |  | -1.092 |  |  | SM.Only.Down.12H |
| LOC610231 |  |  |  |  |  | -1.079 |  |  | SM.Only.Down.12H |
| LOC610613 |  |  |  |  |  | -2.054 |  |  | SM.Only.Down.12H |
| LOC610841 |  |  |  |  |  | -1.286 |  |  | SM.Only.Down.12H |
| LOC610965 |  |  |  |  |  | -1.51  |  |  | SM.Only.Down.12H |
| LOC611196 |  |  |  |  |  | -1.137 |  |  | SM.Only.Down.12H |
| LOC611582 |  |  |  |  |  | -1.086 |  |  | SM.Only.Down.12H |
| LOC611583 |  |  |  |  |  | -2.246 |  |  | SM.Only.Down.12H |
| LOC611690 |  |  |  |  |  | -1.026 |  |  | SM.Only.Down.12H |
| LOC611699 |  |  |  |  |  | -1.351 |  |  | SM.Only.Down.12H |
| LOC611747 |  |  |  |  |  | -1.333 |  |  | SM.Only.Down.12H |
| LOC611930 |  |  |  |  |  | -1.168 |  |  | SM.Only.Down.12H |
| LOC612135 |  |  |  |  |  | -1.248 |  |  | SM.Only.Down.12H |
| LOC612165 |  |  |  |  |  | -1.176 |  |  | SM.Only.Down.12H |
| LOC612534 |  |  |  |  |  | -1.804 |  |  | SM.Only.Down.12H |
| LOC612672 |  |  |  |  |  | -1.151 |  |  | SM.Only.Down.12H |
| LPIN3     |  |  |  |  |  | -2.141 |  |  | SM.Only.Down.12H |
| LPIN1     |  |  |  |  |  | -1.108 |  |  | SM.Only.Down.12H |
| LRCH2     |  |  |  |  |  | -1.08  |  |  | SM.Only.Down.12H |
| LRRC14    |  |  |  |  |  | -1.096 |  |  | SM.Only.Down.12H |
| LSMD1     |  |  |  |  |  | -1.354 |  |  | SM.Only.Down.12H |
| MAB21L1   |  |  |  |  |  | -1.195 |  |  | SM.Only.Down.12H |
| MAF1      |  |  |  |  |  | -2.457 |  |  | SM.Only.Down.12H |
| MAN2A2    |  |  |  |  |  | -1.398 |  |  | SM.Only.Down.12H |
| MAP2K6    |  |  |  |  |  | -1.086 |  |  | SM.Only.Down.12H |
| MAP4K3    |  |  |  |  |  | -1.101 |  |  | SM.Only.Down.12H |
| MAP9      |  |  |  |  |  | -1.123 |  |  | SM.Only.Down.12H |
| MAPRE2    |  |  |  |  |  | -1.463 |  |  | SM.Only.Down.12H |
| MBNL2     |  |  |  |  |  | -1.11  |  |  | SM.Only.Down.12H |
| MCC       |  |  |  |  |  | -1.165 |  |  | SM.Only.Down.12H |
| MCF2L     |  |  |  |  |  | -1.081 |  |  | SM.Only.Down.12H |
| MCDLN2    |  |  |  |  |  | -1.036 |  |  | SM.Only.Down.12H |
| ME3       |  |  |  |  |  | -1.429 |  |  | SM.Only.Down.12H |
| MEGF10    |  |  |  |  |  | -1.144 |  |  | SM.Only.Down.12H |
| MERTK     |  |  |  |  |  | -1.937 |  |  | SM.Only.Down.12H |
| MFAP5     |  |  |  |  |  | -1.053 |  |  | SM.Only.Down.12H |
| MGST2     |  |  |  |  |  | -1.356 |  |  | SM.Only.Down.12H |
| MIA3      |  |  |  |  |  | -1.153 |  |  | SM.Only.Down.12H |
| MIPOL1    |  |  |  |  |  | -1.143 |  |  | SM.Only.Down.12H |

|           |  |  |  |  |  |        |  |  |                  |
|-----------|--|--|--|--|--|--------|--|--|------------------|
| MLXPL     |  |  |  |  |  | -1.3   |  |  | SM.Only.Down.12H |
| MMP23B    |  |  |  |  |  | -1.009 |  |  | SM.Only.Down.12H |
| MMPPE1    |  |  |  |  |  | -1.328 |  |  | SM.Only.Down.12H |
| MPST      |  |  |  |  |  | -1.106 |  |  | SM.Only.Down.12H |
| MSI2      |  |  |  |  |  | -1.004 |  |  | SM.Only.Down.12H |
| MST1R     |  |  |  |  |  | -1.725 |  |  | SM.Only.Down.12H |
| MTMR7     |  |  |  |  |  | -1.565 |  |  | SM.Only.Down.12H |
| MYO6      |  |  |  |  |  | -1.936 |  |  | SM.Only.Down.12H |
| MYOF      |  |  |  |  |  | -1.067 |  |  | SM.Only.Down.12H |
| MYOT      |  |  |  |  |  | -1.447 |  |  | SM.Only.Down.12H |
| NAALAD2   |  |  |  |  |  | -1.08  |  |  | SM.Only.Down.12H |
| NAE1      |  |  |  |  |  | -1.029 |  |  | SM.Only.Down.12H |
| NAP1L3    |  |  |  |  |  | -1.851 |  |  | SM.Only.Down.12H |
| NARF      |  |  |  |  |  | -1.037 |  |  | SM.Only.Down.12H |
| NBEAL1    |  |  |  |  |  | -1.064 |  |  | SM.Only.Down.12H |
| NDUFV1    |  |  |  |  |  | -1.386 |  |  | SM.Only.Down.12H |
| NHEDC2    |  |  |  |  |  | -1.051 |  |  | SM.Only.Down.12H |
| NOX4      |  |  |  |  |  | -1.269 |  |  | SM.Only.Down.12H |
| NPH1      |  |  |  |  |  | -2.596 |  |  | SM.Only.Down.12H |
| NPR2      |  |  |  |  |  | -1.644 |  |  | SM.Only.Down.12H |
| NR2F6     |  |  |  |  |  | -1.695 |  |  | SM.Only.Down.12H |
| NRP2      |  |  |  |  |  | -1.329 |  |  | SM.Only.Down.12H |
| NSMCE4A   |  |  |  |  |  | -1.078 |  |  | SM.Only.Down.12H |
| NTSE      |  |  |  |  |  | -2.454 |  |  | SM.Only.Down.12H |
| NTNG2     |  |  |  |  |  | -1.397 |  |  | SM.Only.Down.12H |
| NUB1      |  |  |  |  |  | -1.347 |  |  | SM.Only.Down.12H |
| NUBPL     |  |  |  |  |  | -1.085 |  |  | SM.Only.Down.12H |
| NUDT7     |  |  |  |  |  | -1.244 |  |  | SM.Only.Down.12H |
| NXP2      |  |  |  |  |  | -1.48  |  |  | SM.Only.Down.12H |
| OCA2      |  |  |  |  |  | -1.18  |  |  | SM.Only.Down.12H |
| OPTC      |  |  |  |  |  | -1.106 |  |  | SM.Only.Down.12H |
| OR08B05   |  |  |  |  |  | -1.284 |  |  | SM.Only.Down.12H |
| OSCP1     |  |  |  |  |  | -1.2   |  |  | SM.Only.Down.12H |
| OSR2      |  |  |  |  |  | -1.331 |  |  | SM.Only.Down.12H |
| OXC11     |  |  |  |  |  | -1.259 |  |  | SM.Only.Down.12H |
| PAH       |  |  |  |  |  | -1.096 |  |  | SM.Only.Down.12H |
| PARK7     |  |  |  |  |  | -1.223 |  |  | SM.Only.Down.12H |
| PARN      |  |  |  |  |  | -1.286 |  |  | SM.Only.Down.12H |
| PARP8     |  |  |  |  |  | -1.412 |  |  | SM.Only.Down.12H |
| PBX3      |  |  |  |  |  | -1.016 |  |  | SM.Only.Down.12H |
| PCK1      |  |  |  |  |  | -2.36  |  |  | SM.Only.Down.12H |
| PDE1A     |  |  |  |  |  | -2.815 |  |  | SM.Only.Down.12H |
| PDK3      |  |  |  |  |  | -1.489 |  |  | SM.Only.Down.12H |
| PECR      |  |  |  |  |  | -1.578 |  |  | SM.Only.Down.12H |
| PEX7      |  |  |  |  |  | -1.215 |  |  | SM.Only.Down.12H |
| PHKA2     |  |  |  |  |  | -1.085 |  |  | SM.Only.Down.12H |
| PIPOX     |  |  |  |  |  | -1.078 |  |  | SM.Only.Down.12H |
| PITPNM1   |  |  |  |  |  | -1.104 |  |  | SM.Only.Down.12H |
| PLA2R1    |  |  |  |  |  | -1.657 |  |  | SM.Only.Down.12H |
| PLEKHA5   |  |  |  |  |  | -1.041 |  |  | SM.Only.Down.12H |
| PLEKH01   |  |  |  |  |  | -1.144 |  |  | SM.Only.Down.12H |
| PLD2      |  |  |  |  |  | -1.624 |  |  | SM.Only.Down.12H |
| POMT1     |  |  |  |  |  | -1.179 |  |  | SM.Only.Down.12H |
| POT1      |  |  |  |  |  | -1.117 |  |  | SM.Only.Down.12H |
| PPAPDC3   |  |  |  |  |  | -1.352 |  |  | SM.Only.Down.12H |
| PPM1B     |  |  |  |  |  | -1.412 |  |  | SM.Only.Down.12H |
| PPM1E     |  |  |  |  |  | -1.329 |  |  | SM.Only.Down.12H |
| PPM1K     |  |  |  |  |  | -1.516 |  |  | SM.Only.Down.12H |
| PPP2R3A   |  |  |  |  |  | -1.019 |  |  | SM.Only.Down.12H |
| PRICKLE1  |  |  |  |  |  | -2.653 |  |  | SM.Only.Down.12H |
| PRKACA    |  |  |  |  |  | -1.144 |  |  | SM.Only.Down.12H |
| PRKCA     |  |  |  |  |  | -1.335 |  |  | SM.Only.Down.12H |
| PRKCI     |  |  |  |  |  | -1.317 |  |  | SM.Only.Down.12H |
| PRKDC     |  |  |  |  |  | -1.961 |  |  | SM.Only.Down.12H |
| PROCA1    |  |  |  |  |  | -1.155 |  |  | SM.Only.Down.12H |
| PRODH     |  |  |  |  |  | -1.084 |  |  | SM.Only.Down.12H |
| PRRG4     |  |  |  |  |  | -1.64  |  |  | SM.Only.Down.12H |
| PRSS23    |  |  |  |  |  | -1.514 |  |  | SM.Only.Down.12H |
| PSPC1     |  |  |  |  |  | -1.111 |  |  | SM.Only.Down.12H |
| PTPN14    |  |  |  |  |  | -1.052 |  |  | SM.Only.Down.12H |
| PTPRCAP   |  |  |  |  |  | -1.135 |  |  | SM.Only.Down.12H |
| PTPRM     |  |  |  |  |  | -1.357 |  |  | SM.Only.Down.12H |
| RAB30     |  |  |  |  |  | -1.43  |  |  | SM.Only.Down.12H |
| RAB38     |  |  |  |  |  | -1.048 |  |  | SM.Only.Down.12H |
| RAB39     |  |  |  |  |  | -1.407 |  |  | SM.Only.Down.12H |
| RAB4      |  |  |  |  |  | -1.086 |  |  | SM.Only.Down.12H |
| RAD51L1   |  |  |  |  |  | -1.009 |  |  | SM.Only.Down.12H |
| RAD51L3   |  |  |  |  |  | -1.088 |  |  | SM.Only.Down.12H |
| RANBP9    |  |  |  |  |  | -1.136 |  |  | SM.Only.Down.12H |
| RBM45     |  |  |  |  |  | -1.425 |  |  | SM.Only.Down.12H |
| RBM9      |  |  |  |  |  | -1.418 |  |  | SM.Only.Down.12H |
| REER      |  |  |  |  |  | -1.674 |  |  | SM.Only.Down.12H |
| RFX7      |  |  |  |  |  | -1.089 |  |  | SM.Only.Down.12H |
| RGS22     |  |  |  |  |  | -1.574 |  |  | SM.Only.Down.12H |
| RGS7BP    |  |  |  |  |  | -1.018 |  |  | SM.Only.Down.12H |
| RHOQ      |  |  |  |  |  | -1.087 |  |  | SM.Only.Down.12H |
| RIN2      |  |  |  |  |  | -1.614 |  |  | SM.Only.Down.12H |
| RMND1     |  |  |  |  |  | -1.33  |  |  | SM.Only.Down.12H |
| RNF125    |  |  |  |  |  | -1.312 |  |  | SM.Only.Down.12H |
| ROBO2     |  |  |  |  |  | -1.426 |  |  | SM.Only.Down.12H |
| ROCK1     |  |  |  |  |  | -1.091 |  |  | SM.Only.Down.12H |
| RPAIN     |  |  |  |  |  | -1.475 |  |  | SM.Only.Down.12H |
| RPU5D1    |  |  |  |  |  | -1.015 |  |  | SM.Only.Down.12H |
| RTKN2     |  |  |  |  |  | -1.042 |  |  | SM.Only.Down.12H |
| RUSC2     |  |  |  |  |  | -1.109 |  |  | SM.Only.Down.12H |
| S100BPB   |  |  |  |  |  | -1.21  |  |  | SM.Only.Down.12H |
| SASH1     |  |  |  |  |  | -1.325 |  |  | SM.Only.Down.12H |
| SATB1     |  |  |  |  |  | -1.097 |  |  | SM.Only.Down.12H |
| SCPDH     |  |  |  |  |  | -1.093 |  |  | SM.Only.Down.12H |
| SCN5A     |  |  |  |  |  | -1.151 |  |  | SM.Only.Down.12H |
| SCRN1     |  |  |  |  |  | -1.156 |  |  | SM.Only.Down.12H |
| SEPN1     |  |  |  |  |  | -1.036 |  |  | SM.Only.Down.12H |
| SERTAD4   |  |  |  |  |  | -2.153 |  |  | SM.Only.Down.12H |
| SFRS12IP1 |  |  |  |  |  | -1.142 |  |  | SM.Only.Down.12H |
| SFRS18    |  |  |  |  |  | -1.055 |  |  | SM.Only.Down.12H |
| SGCB      |  |  |  |  |  | -1.057 |  |  | SM.Only.Down.12H |
| SHPK      |  |  |  |  |  | -1.094 |  |  | SM.Only.Down.12H |
| SLC1A3    |  |  |  |  |  | -1.011 |  |  | SM.Only.Down.12H |
| SLC22A2   |  |  |  |  |  | -1.568 |  |  | SM.Only.Down.12H |
| SLC43A1   |  |  |  |  |  | -1.111 |  |  | SM.Only.Down.12H |
| SLC44A1   |  |  |  |  |  | -1.291 |  |  | SM.Only.Down.12H |
| SLC7A14   |  |  |  |  |  | -1.147 |  |  | SM.Only.Down.12H |
| SNTB1     |  |  |  |  |  | -1.357 |  |  | SM.Only.Down.12H |
| SNX25     |  |  |  |  |  | -1.685 |  |  | SM.Only.Down.12H |
| SOBP      |  |  |  |  |  | -1.047 |  |  | SM.Only.Down.12H |
| SORD      |  |  |  |  |  | -1.419 |  |  | SM.Only.Down.12H |
| SOX6      |  |  |  |  |  | -1.119 |  |  | SM.Only.Down.12H |
| SPIN4     |  |  |  |  |  | -1.428 |  |  | SM.Only.Down.12H |
| SPINT2    |  |  |  |  |  | -1.006 |  |  | SM.Only.Down.12H |
| SPON1     |  |  |  |  |  | -1.332 |  |  | SM.Only.Down.12H |
| SPTLC3    |  |  |  |  |  | -1.918 |  |  | SM.Only.Down.12H |
| STK33     |  |  |  |  |  | -1.4   |  |  | SM.Only.Down.12H |
| STK39     |  |  |  |  |  | -1.113 |  |  | SM.Only.Down.12H |



|           |  |  |  |  |  |        |        |  |                  |
|-----------|--|--|--|--|--|--------|--------|--|------------------|
| SULF1     |  |  |  |  |  | -1.353 |        |  | SM.Only_Down.12H |
| SULT1C4   |  |  |  |  |  | -1.646 |        |  | SM.Only_Down.12H |
| SYCE2     |  |  |  |  |  | -1.311 |        |  | SM.Only_Down.12H |
| TAC22     |  |  |  |  |  | -1.244 |        |  | SM.Only_Down.12H |
| TACR1     |  |  |  |  |  | -1.218 |        |  | SM.Only_Down.12H |
| TBL1X     |  |  |  |  |  | -1.046 |        |  | SM.Only_Down.12H |
| TBX5      |  |  |  |  |  | -1.097 |        |  | SM.Only_Down.12H |
| TCF7L1    |  |  |  |  |  | -1.151 |        |  | SM.Only_Down.12H |
| TGFB111   |  |  |  |  |  | -1.304 |        |  | SM.Only_Down.12H |
| THY1      |  |  |  |  |  | -1.365 |        |  | SM.Only_Down.12H |
| TMEM126A  |  |  |  |  |  | -1.035 |        |  | SM.Only_Down.12H |
| TMEM176B  |  |  |  |  |  | -1.199 |        |  | SM.Only_Down.12H |
| TMEM419   |  |  |  |  |  | -1.447 |        |  | SM.Only_Down.12H |
| TMEM51    |  |  |  |  |  | -1.134 |        |  | SM.Only_Down.12H |
| TMEM67    |  |  |  |  |  | -1.373 |        |  | SM.Only_Down.12H |
| TMEM88    |  |  |  |  |  | -1.003 |        |  | SM.Only_Down.12H |
| TMEM98    |  |  |  |  |  | -1.43  |        |  | SM.Only_Down.12H |
| TMLHE     |  |  |  |  |  | -1.569 |        |  | SM.Only_Down.12H |
| TNNI3     |  |  |  |  |  | -1.15  |        |  | SM.Only_Down.12H |
| TPP52L1   |  |  |  |  |  | -1.43  |        |  | SM.Only_Down.12H |
| TPM2      |  |  |  |  |  | -1.525 |        |  | SM.Only_Down.12H |
| TPP1      |  |  |  |  |  | -1.201 |        |  | SM.Only_Down.12H |
| TRAF5     |  |  |  |  |  | -1.949 |        |  | SM.Only_Down.12H |
| TRAFD1    |  |  |  |  |  | -1.836 |        |  | SM.Only_Down.12H |
| TRERF1    |  |  |  |  |  | -1.093 |        |  | SM.Only_Down.12H |
| TRPC4     |  |  |  |  |  | -1.33  |        |  | SM.Only_Down.12H |
| TRPM3     |  |  |  |  |  | -1.981 |        |  | SM.Only_Down.12H |
| TTC12     |  |  |  |  |  | -1.072 |        |  | SM.Only_Down.12H |
| TTC21A    |  |  |  |  |  | -1.941 |        |  | SM.Only_Down.12H |
| TTC39B    |  |  |  |  |  | -1.678 |        |  | SM.Only_Down.12H |
| TTC8      |  |  |  |  |  | -1.509 |        |  | SM.Only_Down.12H |
| TUSC4     |  |  |  |  |  | -1.201 |        |  | SM.Only_Down.12H |
| TXNDC16   |  |  |  |  |  | -1.321 |        |  | SM.Only_Down.12H |
| UBAC1     |  |  |  |  |  | -1.051 |        |  | SM.Only_Down.12H |
| UBE4B     |  |  |  |  |  | -1.022 |        |  | SM.Only_Down.12H |
| UBR3      |  |  |  |  |  | -1.027 |        |  | SM.Only_Down.12H |
| UHRF1BP1L |  |  |  |  |  | -1.184 |        |  | SM.Only_Down.12H |
| ULX4      |  |  |  |  |  | -1.096 |        |  | SM.Only_Down.12H |
| UPF3B     |  |  |  |  |  | -1.259 |        |  | SM.Only_Down.12H |
| USP25     |  |  |  |  |  | -1.479 |        |  | SM.Only_Down.12H |
| USP28     |  |  |  |  |  | -1.526 |        |  | SM.Only_Down.12H |
| VWA3B     |  |  |  |  |  | -1.215 |        |  | SM.Only_Down.12H |
| WASF3     |  |  |  |  |  | -1.734 |        |  | SM.Only_Down.12H |
| WDR52     |  |  |  |  |  | -1.899 |        |  | SM.Only_Down.12H |
| WDSUB1    |  |  |  |  |  | -1.047 |        |  | SM.Only_Down.12H |
| WEE1      |  |  |  |  |  | -1.44  |        |  | SM.Only_Down.12H |
| WHSC1L1   |  |  |  |  |  | -1.239 |        |  | SM.Only_Down.12H |
| WWC2      |  |  |  |  |  | -1.12  |        |  | SM.Only_Down.12H |
| XRCC6BP1  |  |  |  |  |  | -1.298 |        |  | SM.Only_Down.12H |
| YBX2      |  |  |  |  |  | -1.019 |        |  | SM.Only_Down.12H |
| YIPF1     |  |  |  |  |  | -1.181 |        |  | SM.Only_Down.12H |
| ZBED5     |  |  |  |  |  | -1.057 |        |  | SM.Only_Down.12H |
| ZBTB38    |  |  |  |  |  | -1.184 |        |  | SM.Only_Down.12H |
| ZC3H6     |  |  |  |  |  | -1.15  |        |  | SM.Only_Down.12H |
| ZFP161    |  |  |  |  |  | -1.532 |        |  | SM.Only_Down.12H |
| ZFP62     |  |  |  |  |  | -1.047 |        |  | SM.Only_Down.12H |
| ZFYVE21   |  |  |  |  |  | -1.118 |        |  | SM.Only_Down.12H |
| ZNF132    |  |  |  |  |  | -1.114 |        |  | SM.Only_Down.12H |
| ZNF157    |  |  |  |  |  | -1.46  |        |  | SM.Only_Down.12H |
| ZNF181    |  |  |  |  |  | -1.112 |        |  | SM.Only_Down.12H |
| ZNF215    |  |  |  |  |  | -1.285 |        |  | SM.Only_Down.12H |
| ZNF3970S  |  |  |  |  |  | -1.927 |        |  | SM.Only_Down.12H |
| ZNF483    |  |  |  |  |  | -1.118 |        |  | SM.Only_Down.12H |
| ZNF608    |  |  |  |  |  | -1.147 |        |  | SM.Only_Down.12H |
| AARS2     |  |  |  |  |  | -2.623 |        |  | SM.Only_Down.24H |
| ALPK3     |  |  |  |  |  | -1.646 |        |  | SM.Only_Down.24H |
| CATSPERG  |  |  |  |  |  | -1.608 |        |  | SM.Only_Down.24H |
| CENMT2    |  |  |  |  |  | -1.587 |        |  | SM.Only_Down.24H |
| GPRASP1   |  |  |  |  |  | -1.718 |        |  | SM.Only_Down.24H |
| KCNJ3     |  |  |  |  |  | -1.793 |        |  | SM.Only_Down.24H |
| LOC475030 |  |  |  |  |  | -1.392 |        |  | SM.Only_Down.24H |
| LOC479686 |  |  |  |  |  | -1.486 |        |  | SM.Only_Down.24H |
| LOC609175 |  |  |  |  |  | -1.25  |        |  | SM.Only_Down.24H |
| MEF2A     |  |  |  |  |  | -2.156 |        |  | SM.Only_Down.24H |
| OVPG1     |  |  |  |  |  | -1.629 |        |  | SM.Only_Down.24H |
| PIG3      |  |  |  |  |  | -1.588 |        |  | SM.Only_Down.24H |
| RGS5      |  |  |  |  |  | -4.353 |        |  | SM.Only_Down.24H |
| SERINC3   |  |  |  |  |  | -1.767 |        |  | SM.Only_Down.24H |
| SERPINF1  |  |  |  |  |  | -1.59  |        |  | SM.Only_Down.24H |
| STAG2     |  |  |  |  |  | -1.334 |        |  | SM.Only_Down.24H |
| ZNF227    |  |  |  |  |  | -1.765 |        |  | SM.Only_Down.24H |
| ACADVL    |  |  |  |  |  |        | -1.026 |  | SM.Only_Down.7D  |
| ACO112    |  |  |  |  |  |        | -1.228 |  | SM.Only_Down.7D  |
| ACS8G2    |  |  |  |  |  |        | -1.052 |  | SM.Only_Down.7D  |
| ALKBH1    |  |  |  |  |  |        | -1.044 |  | SM.Only_Down.7D  |
| ANKMY1    |  |  |  |  |  |        | -1.113 |  | SM.Only_Down.7D  |
| ANKRD46   |  |  |  |  |  |        | -1.152 |  | SM.Only_Down.7D  |
| AP1G2     |  |  |  |  |  |        | -1.253 |  | SM.Only_Down.7D  |
| APOM      |  |  |  |  |  |        | -1.193 |  | SM.Only_Down.7D  |
| ARHGAP24  |  |  |  |  |  |        | -1.29  |  | SM.Only_Down.7D  |
| ARRHGAP5  |  |  |  |  |  |        | -1.092 |  | SM.Only_Down.7D  |
| ARID5A    |  |  |  |  |  |        | -1.431 |  | SM.Only_Down.7D  |
| ATG4B     |  |  |  |  |  |        | -1.045 |  | SM.Only_Down.7D  |
| B3GALNT2  |  |  |  |  |  |        | -1.029 |  | SM.Only_Down.7D  |
| B3GALT5   |  |  |  |  |  |        | -1.108 |  | SM.Only_Down.7D  |
| BCL2L1    |  |  |  |  |  |        | -1.043 |  | SM.Only_Down.7D  |
| BIRC6     |  |  |  |  |  |        | -1.623 |  | SM.Only_Down.7D  |
| BOLA1     |  |  |  |  |  |        | -1.035 |  | SM.Only_Down.7D  |
| CAB       |  |  |  |  |  |        | -1.04  |  | SM.Only_Down.7D  |
| CADM2     |  |  |  |  |  |        | -1.182 |  | SM.Only_Down.7D  |
| CANT1     |  |  |  |  |  |        | -1.057 |  | SM.Only_Down.7D  |
| CAP2B     |  |  |  |  |  |        | -1.096 |  | SM.Only_Down.7D  |
| CARD9     |  |  |  |  |  |        | -1.027 |  | SM.Only_Down.7D  |
| CATSPER4  |  |  |  |  |  |        | -1.07  |  | SM.Only_Down.7D  |
| CCDC106   |  |  |  |  |  |        | -1.237 |  | SM.Only_Down.7D  |
| CCDC92    |  |  |  |  |  |        | -1.288 |  | SM.Only_Down.7D  |
| CCDC97    |  |  |  |  |  |        | -1.337 |  | SM.Only_Down.7D  |
| CCL24     |  |  |  |  |  |        | -1.205 |  | SM.Only_Down.7D  |
| CCNL2     |  |  |  |  |  |        | -1.964 |  | SM.Only_Down.7D  |
| CD34      |  |  |  |  |  |        | -1.533 |  | SM.Only_Down.7D  |
| CD79A     |  |  |  |  |  |        | -1.086 |  | SM.Only_Down.7D  |
| CD97      |  |  |  |  |  |        | -1.199 |  | SM.Only_Down.7D  |
| CD208     |  |  |  |  |  |        | -1.448 |  | SM.Only_Down.7D  |
| CDH29     |  |  |  |  |  |        | -1.095 |  | SM.Only_Down.7D  |
| CDK2AP2   |  |  |  |  |  |        | -1.368 |  | SM.Only_Down.7D  |
| CHADL     |  |  |  |  |  |        | -1.347 |  | SM.Only_Down.7D  |
| CHST9     |  |  |  |  |  |        | -1.305 |  | SM.Only_Down.7D  |
| CIZ1      |  |  |  |  |  |        | -1.068 |  | SM.Only_Down.7D  |
| CLDN5     |  |  |  |  |  |        | -1.179 |  | SM.Only_Down.7D  |
| CLIP4     |  |  |  |  |  |        | -1.208 |  | SM.Only_Down.7D  |
| CLRN1     |  |  |  |  |  |        | -1.411 |  | SM.Only_Down.7D  |
| CNR1      |  |  |  |  |  |        | -1.059 |  | SM.Only_Down.7D  |
| CNTRF     |  |  |  |  |  |        | -1.57  |  | SM.Only_Down.7D  |





|            |       |       |       |       |       |       |       |       |       |       |                                                                     |
|------------|-------|-------|-------|-------|-------|-------|-------|-------|-------|-------|---------------------------------------------------------------------|
| FCGR1A     |       | 4.354 | 5.554 | 3.768 |       |       | 4.404 | 3.628 | 3.938 | 2.886 | EN.SM.Up.12H.24H.7D, SM.Only.Up.30D                                 |
| CCL4       | 2.776 | 2.235 | 2.613 |       |       | 3.469 | 3.731 | 2.914 | 1.661 |       | EN.SM.Up.2H.12H.24H, SM.Only.Up.7D                                  |
| SH3BP1     |       | 2.836 | 3.278 | 4.131 | 3.433 |       | 3.42  | 2.512 |       |       | EN.SM.Up.12H.24H, EN.Only.Up.7D.30D                                 |
| TOP2A      |       | 1.579 | 3.215 | 5.564 | 3.839 |       |       |       | 5.416 | 4.067 | EN.SM.Up.7D.30D, EN.Only.Up.12H.24H                                 |
| CCL7       | 4.131 | 5.131 | 3.968 | 1.816 |       |       | 6.655 | 4.777 |       |       | EN.SM.Up.12H.24H, EN.Only.Up.2H.7D                                  |
| CD4        | 3.107 | 4.312 | 3.726 | 1.375 |       |       | 4.12  | 3.86  |       |       | EN.SM.Up.12H.24H, EN.Only.Up.2H.7D                                  |
| LOC608848  | 2.104 | 2.628 | 3.454 | 2.745 |       |       | 2.613 | 2.419 |       |       | EN.SM.Up.12H.24H, EN.Only.Up.2H.7D                                  |
| OBFC2A     | 1.988 | 3.059 | 3.349 | 2.009 |       |       | 3.407 | 2.793 |       |       | EN.SM.Up.12H.24H, EN.Only.Up.2H.7D                                  |
| S100A8     | 4.538 | 5.488 | 4.738 | 3.253 |       |       | 7.53  | 4.993 |       |       | EN.SM.Up.12H.24H, EN.Only.Up.2H.7D                                  |
| SDC4       | 2.998 | 1.558 | 1.641 | 1.155 |       |       | 1.39  | 2.175 |       |       | EN.SM.Up.12H.24H, EN.Only.Up.2H.7D                                  |
| SORL1      | 2.844 | 3.973 | 3.892 | 3.569 |       |       | 3.777 | 3.066 |       |       | EN.SM.Up.12H.24H, EN.Only.Up.2H.7D                                  |
| CKCR       |       | 2.63  | 2.955 | 3.126 |       | 2.244 | 2.362 | 2.418 |       |       | EN.SM.Up.12H.24H, SM.Only.Up.2H, EN.Only.Up.7D                      |
| GNPNA1     | 2.624 | 1.918 | 1.223 |       |       |       | 2.214 | 1.899 | 1.089 |       | EN.SM.Up.12H.24H, SM.Only.Up.7D, EN.Only.Up.2H                      |
| HAS2       | 2.526 | 2.591 | 1.767 |       |       |       | 5.049 | 4.378 | 1.572 |       | EN.SM.Up.12H.24H, SM.Only.Up.7D, EN.Only.Up.2H                      |
| ACOT7      |       | 1.699 | 2.978 | 1.448 |       |       | 1.235 | 3.252 | 1.434 |       | EN.SM.Up.12H.24H.7D                                                 |
| APBB1IP    |       | 2.63  | 4.285 | 2.675 |       |       | 1.203 | 3.302 | 1.974 |       | EN.SM.Up.12H.24H.7D                                                 |
| ASNS       |       | 1.584 | 1.825 | 1.679 |       |       | 1.175 | 3.265 | 1.562 |       | EN.SM.Up.12H.24H.7D                                                 |
| ATP8B4     |       | 2.396 | 2.649 | 2.05  |       |       | 2.223 | 2.514 | 1.645 |       | EN.SM.Up.12H.24H.7D                                                 |
| BCA11      |       | 1.14  | 3.159 | 3.978 |       |       | 1.382 | 3.214 | 2.848 |       | EN.SM.Up.12H.24H.7D                                                 |
| BC12A1     |       | 2.111 | 2.489 | 2.418 |       |       | 5.511 | 4.267 | 3.515 |       | EN.SM.Up.12H.24H.7D                                                 |
| BIN2       |       | 3.022 | 2.451 | 2.641 |       |       | 3.146 | 2.492 | 2.493 |       | EN.SM.Up.12H.24H.7D                                                 |
| CALR       |       | 1.267 | 1.829 | 1.26  |       |       | 1.018 | 1.917 | 1.07  |       | EN.SM.Up.12H.24H.7D                                                 |
| CCL2       |       | 4.902 | 4.114 | 4.553 |       |       | 6.679 | 5.702 | 3.701 |       | EN.SM.Up.12H.24H.7D                                                 |
| CD48       |       | 3.161 | 4.497 | 3.251 |       |       | 4.51  | 3.08  | 2.972 |       | EN.SM.Up.12H.24H.7D                                                 |
| CKAP4      |       | 1.638 | 3.257 | 1.404 |       |       | 1.171 | 3.402 | 1.294 |       | EN.SM.Up.12H.24H.7D                                                 |
| CLEC4E     |       | 2.998 | 3.597 | 3.2   |       |       | 3.572 | 2.656 | 2.312 |       | EN.SM.Up.12H.24H.7D                                                 |
| GLIPI1     |       | 2.188 | 2.14  | 1.432 |       |       | 2.633 | 1.744 | 1.086 |       | EN.SM.Up.12H.24H.7D                                                 |
| HMGCR      |       | 1.419 | 1.958 | 1.356 |       |       | 1.808 | 2.1   | 1.949 |       | EN.SM.Up.12H.24H.7D                                                 |
| IL6        |       | 5.68  | 4.35  | 2.746 |       |       | 8.776 | 8.078 | 3.979 |       | EN.SM.Up.12H.24H.7D                                                 |
| LOC482041  |       | 1.719 | 2.325 | 2.147 |       |       | 2.749 | 1.881 | 1.448 |       | EN.SM.Up.12H.24H.7D                                                 |
| LOC489680  |       | 3.888 | 3.904 | 1.91  |       |       | 3.15  | 2.168 | 1.09  |       | EN.SM.Up.12H.24H.7D                                                 |
| LOC491080  |       | 2.579 | 2.557 | 1.537 |       |       | 2.715 | 2.495 | 1.476 |       | EN.SM.Up.12H.24H.7D                                                 |
| LYN        |       | 2.034 | 2.588 | 2.758 |       |       | 2.132 | 2.028 | 2.199 |       | EN.SM.Up.12H.24H.7D                                                 |
| MMP19      |       | 1.683 | 3.667 | 3.284 |       |       | 2.856 | 2.963 | 2.26  |       | EN.SM.Up.12H.24H.7D                                                 |
| NCBP2      |       | 1.819 | 1.598 | 1.41  |       |       | 1.258 | 1.597 | 1.331 |       | EN.SM.Up.12H.24H.7D                                                 |
| NME1       |       | 2.278 | 2.651 | 2.148 |       |       | 3.477 | 3.528 | 1.995 |       | EN.SM.Up.12H.24H.7D                                                 |
| PLA2G7     |       | 2.401 | 2.367 | 2.334 |       |       | 2.027 | 1.859 | 1.597 |       | EN.SM.Up.12H.24H.7D                                                 |
| PSAT1      |       | 2.57  | 2.574 | 1.676 |       |       | 1.232 | 2.173 | 1.404 |       | EN.SM.Up.12H.24H.7D                                                 |
| PTPRC      |       | 3.868 | 3.635 | 2.877 |       |       | 2.996 | 2.533 | 1.927 |       | EN.SM.Up.12H.24H.7D                                                 |
| RUNX1      |       | 2.652 | 1.578 | 1.225 |       |       | 3.086 | 2.599 | 1.954 |       | EN.SM.Up.12H.24H.7D                                                 |
| RUNX2      |       | 2.292 | 2.021 | 1.893 |       |       | 1.598 | 2.051 | 2.195 |       | EN.SM.Up.12H.24H.7D                                                 |
| SELL       |       | 1.94  | 3.247 | 2.658 |       |       | 2.112 | 6.835 | 3.564 |       | EN.SM.Up.12H.24H.7D                                                 |
| SLC20A1    |       | 1.353 | 2.234 | 1.522 |       |       | 1.842 | 1.916 | 1.604 |       | EN.SM.Up.12H.24H.7D                                                 |
| STK17B     |       | 2.433 | 1.637 | 1.397 |       |       | 2.109 | 2.334 | 1.725 |       | EN.SM.Up.12H.24H.7D                                                 |
| TIMP1      |       | 1.747 | 2.093 | 2.501 |       |       | 4.016 | 3.966 | 2.464 |       | EN.SM.Up.12H.24H.7D                                                 |
| UBASH3B    |       | 2.558 | 2.666 | 1.547 |       |       | 3.134 | 3.54  | 1.857 |       | EN.SM.Up.12H.24H.7D                                                 |
| VASH2      |       | 3.769 | 2.849 | 1.996 |       |       | 3.931 | 3.897 | 3.132 |       | EN.SM.Up.12H.24H.7D                                                 |
| SKAP2      |       | 2.865 | 3.559 | 2.447 |       |       | 3.43  | 3.61  | 2.872 |       | EN.SM.Up.12H.24H.7D, SM.Only.Down.7D                                |
| AIF1       | 1.734 | 2.175 | 3.452 | 2.21  |       |       | 2.614 |       | 2.326 |       | EN.SM.Up.12H.7D, EN.Only.Up.2H.24H                                  |
| GN2        | 2.075 | 1.307 | 1.531 | 3.061 |       |       | 1.262 |       | 1.337 |       | EN.SM.Up.12H.7D, EN.Only.Up.2H.24H                                  |
| GPR65      | 1.794 | 3.649 | 3.913 | 3.105 |       |       | 2.696 |       | 2.357 |       | EN.SM.Up.12H.7D, EN.Only.Up.2H.24H                                  |
| RAC2       | 3.531 | 5.662 | 5.568 | 4.448 |       |       | 5.974 |       | 2.036 |       | EN.SM.Up.12H.7D, EN.Only.Up.2H.24H                                  |
| SLA        | 1.79  | 1.806 | 1.651 | 1.852 |       |       | 1.77  |       | 2.757 |       | EN.SM.Up.12H.7D, EN.Only.Up.2H.24H                                  |
| CYBB       | 2.056 | 2.791 | 4.138 | 4.586 |       |       | 1.697 |       | 1.744 |       | EN.SM.Up.12H.7D, SM.Only.Down.7D, EN.Only.Up.2H.24H                 |
| CD80       |       | 1.302 | 1.337 | 1.762 |       |       | 1.091 |       | 1.556 | 2.864 | EN.SM.Up.12H.7D, SM.Only.Up.30D, EN.Only.Up.24H                     |
| COL5A2     |       |       |       | 1.771 | 2.04  |       |       | 1.373 | 2.916 | 1.974 | EN.SM.Up.7D.30D, SM.Only.Up.24H                                     |
| MPEG1      |       |       | 1.287 | 1.444 | 3.386 |       |       | 1.878 | 3.563 |       | EN.SM.Up.7D, SM.Only.Up.12H, EN.Only.Up.24H.30D                     |
| DLA-DRA1   |       |       | 4.017 | 3.803 | 3.588 |       |       | 1.682 | 3.174 |       | EN.SM.Up.7D, SM.Only.Up.12H, EN.Only.Up.24H.30D                     |
| C15        |       |       |       | 2.825 | 4.282 |       |       | 1.16  | 2.057 | 2.655 | EN.SM.Up.7D.30D, SM.Only.Up.12H                                     |
| CLDN1      | 3.842 |       |       | 2.811 | 4.495 |       |       | 1.429 | 3.432 |       | EN.SM.Up.7D, SM.Only.Up.12H, EN.Only.Up.2H.30D                      |
| DOCK8      |       | 2.929 | 2.557 | 1.852 |       |       | 1.128 |       | 2.47  |       | EN.Only.Down.24H, EN.Only.Up.12H.7D, EN.SM.Down.12H, EN.Only.Up.24H |
| CFP        | 2.341 | 3.453 | 4.012 | 2.495 |       |       | 3.435 |       |       |       | EN.SM.Up.12H, EN.Only.Up.2H.24H.7D                                  |
| CORO1A     | 2.552 | 2.015 | 1.701 | 2.656 |       |       | 1.676 |       |       |       | EN.SM.Up.12H, EN.Only.Up.2H.24H.7D                                  |
| EMR1       | 2.733 | 1.636 | 4.232 | 1.745 |       |       | 3.276 |       |       |       | EN.SM.Up.12H, EN.Only.Up.2H.24H.7D                                  |
| FCER1G     | 3.147 | 3.535 | 3.793 | 3.239 |       |       | 3.16  |       |       |       | EN.SM.Up.12H, EN.Only.Up.2H.24H.7D                                  |
| LOC609461  | 2.624 | 3.411 | 2.801 | 2.122 |       |       | 3.261 |       |       |       | EN.SM.Up.12H, EN.Only.Up.2H.24H.7D                                  |
| NC2F       | 1.452 | 1.871 | 1.827 | 1.563 |       |       | 1.635 |       |       |       | EN.SM.Up.12H, EN.Only.Up.2H.24H.7D                                  |
| NC4F       | 2.459 | 2.161 | 1.512 | 2.02  |       |       | 2.199 |       |       |       | EN.SM.Up.12H, EN.Only.Up.2H.24H.7D                                  |
| PLEK       | 2.966 | 3.765 | 2.918 | 1.812 |       |       | 3.727 |       |       |       | EN.SM.Up.12H, EN.Only.Up.2H.24H.7D                                  |
| SELE       | 5.598 | 5.393 | 4.482 | 1.041 |       |       | 1.934 |       |       |       | EN.SM.Up.12H, EN.Only.Up.2H.24H.7D                                  |
| STK17A     | 1.797 | 2.508 | 2.867 | 1.228 |       |       | 2.975 |       |       |       | EN.SM.Up.12H, EN.Only.Up.2H.24H.7D                                  |
| TREM1      | 2.263 | 4.408 | 4.856 | 2.409 |       |       | 4.159 |       |       |       | EN.SM.Up.12H, EN.Only.Up.2H.24H.7D                                  |
| WDFY4      | 3.168 | 1.435 | 3.046 | 3.586 |       |       | 1.24  |       |       |       | EN.SM.Up.12H, EN.Only.Up.2H.24H.7D                                  |
| ZCWPW1     | 3.599 | 1.094 | 4.374 | 3.026 |       |       | 4.023 |       |       |       | EN.SM.Up.12H, EN.Only.Up.2H.24H.7D                                  |
| FOXL1      | 3.455 | 2.772 |       | 1.03  |       |       | 3.781 | 2.799 |       |       | EN.SM.Up.12H, SM.Only.Up.24H, EN.Only.Up.2H.7D                      |
| PPRY13     | 2.751 | 5.079 | 4.179 |       |       |       | 3.579 |       | 1.923 |       | EN.SM.Up.12H, SM.Only.Up.7D, EN.Only.Up.2H.24H                      |
| RA2IP      | 4.218 | 5.734 | 1.777 |       |       |       | 5.828 | 4.607 |       |       | EN.SM.Up.12H.24H, EN.Only.Up.2H                                     |
| BA2IA      | 2.23  | 1.682 | 2.151 |       |       |       | 2.234 | 1.848 |       |       | EN.SM.Up.12H.24H, EN.Only.Up.2H                                     |
| CSAR1      | 3.88  | 5.132 | 6.033 |       |       |       | 3.339 | 3.908 |       |       | EN.SM.Up.12H.24H, EN.Only.Up.2H                                     |
| CSF3R      | 1.948 | 2.901 | 2.014 |       |       |       | 3.037 | 3.355 |       |       | EN.SM.Up.12H.24H, EN.Only.Up.2H                                     |
| DGAT2      | 4.075 | 1.305 | 4.201 |       |       |       | 1.43  | 3.658 |       |       | EN.SM.Up.12H.24H, EN.Only.Up.2H                                     |
| DUSP5      | 3.697 | 4.146 | 2.794 |       |       |       | 3.704 | 2.76  |       |       | EN.SM.Up.12H.24H, EN.Only.Up.2H                                     |
| IL1R2      | 3.56  | 3.61  | 3.521 |       |       |       | 4.361 | 2.786 |       |       | EN.SM.Up.12H.24H, EN.Only.Up.2H                                     |
| IL22RA2    | 3.01  | 5.746 | 4.67  |       |       |       | 6.246 | 4.257 |       |       | EN.SM.Up.12H.24H, EN.Only.Up.2H                                     |
| LAMC2      | 2.843 | 4.154 | 4.71  |       |       |       | 3.028 | 2.525 |       |       | EN.SM.Up.12H.24H, EN.Only.Up.2H                                     |
| LOC479340  | 3.472 | 4.899 | 5.33  |       |       |       | 4.681 | 3.433 |       |       | EN.SM.Up.12H.24H, EN.Only.Up.2H                                     |
| LOC484866  | 2.667 | 5.558 | 3.33  |       |       |       | 5.162 | 3.467 |       |       | EN.SM.Up.12H.24H, EN.Only.Up.2H                                     |
| LOC488247  | 1.741 | 2.816 | 2.217 |       |       |       | 2.761 | 5.086 |       |       | EN.SM.Up.12H.24H, EN.Only.Up.2H                                     |
| S100A9     | 3.566 | 4.9   | 3.168 |       |       |       | 6.078 | 3.669 |       |       | EN.SM.Up.12H.24H, EN.Only.Up.2H                                     |
| SERPIN2    | 2.507 | 2.694 | 2.73  |       |       |       | 2.656 | 3.074 |       |       | EN.SM.Up.12H.24H, EN.Only.Up.2H                                     |
| TRIB1      | 4.186 | 2.148 | 2.519 |       |       |       | 3.662 | 2.426 |       |       | EN.SM.Up.12H.24H, EN.Only.Up.2H                                     |
| CD4        |       | 1.107 | 2.385 | 1.394 |       |       | 1.443 | 1.607 |       |       | EN.SM.Up.12H.24H, EN.Only.Up.7D                                     |
| CPLX2      |       | 2.37  | 2.492 | 1.401 |       |       | 1.369 | 2.731 |       |       | EN.SM.Up.12H.24H, EN.Only.Up.7D                                     |
| GGH        |       | 2.123 | 2.175 | 1.046 |       |       | 2.283 | 2.041 |       |       | EN.SM.Up.12H.24H, EN.Only.Up.7D                                     |
| HMGAI1     |       | 2.186 | 2.944 | 2.073 |       |       | 1.771 | 2.467 |       |       | EN.SM.Up.12H.24H, EN.Only.Up.7D                                     |
| IL1RN      |       | 3.382 | 3.95  | 3.705 |       |       | 3.175 | 2.282 |       |       | EN.SM.Up.12H.24H, EN.Only.Up.7D                                     |
| LY9        |       | 2.646 | 2.204 | 1.631 |       |       | 2.481 | 2.061 |       |       | EN.SM.Up.12H.24H, EN.Only.Up.7D                                     |
| MARS       |       | 1.586 | 2.009 | 1.107 |       |       | 1.761 | 2.275 |       |       | EN.SM.Up.12H.24H, EN.Only.Up.7D                                     |
| RGS14      |       | 3.347 | 3.526 | 1.971 |       |       | 2.916 | 2.085 |       |       | EN.SM.Up.12H.24H, EN.Only.Up.7D                                     |
| S100P      |       | 3.78  | 4.311 | 3.689 |       |       | 4.385 | 2.677 |       |       | EN.SM.Up.12H.24H, EN.Only.Up.7D                                     |
| SRCN       |       | 2.209 | 3.081 | 1.389 |       |       | 5.115 | 3.511 |       |       | EN.SM.Up.12H.24H, EN.Only.Up.7D                                     |
| ST6GALNAC4 |       | 1.615 | 1.862 | 1.425 |       |       | 1.799 | 1.915 |       |       | EN.SM.Up.12H.24H, EN.Only.Up.7D                                     |
| SYK        |       | 3.501 | 2.976 | 1.309 |       |       | 1.14  | 1.97  |       |       | EN.SM.Up.12H.24H, EN.Only.Up.7D                                     |
| GRB2       |       | 1.253 | 1.722 |       |       |       | 1.451 | 1.397 | 1.669 |       | EN.SM.Up.12H.24H, SM.Only.Up.7D                                     |
| KITLG      |       | 1.878 | 1.948 |       |       |       | 1.757 | 2.026 | 1.303 |       | EN.SM.Up.12H.24H, SM.Only.Up.7D                                     |
| LOC478287  |       | 1.401 | 2.108 |       |       |       | 5.432 | 4.368 | 1.109 |       | EN.SM.Up.12H.24H, SM.Only.Up.7D                                     |
| LOC488474  |       | 1.531 | 1.81  |       |       |       | 2.003 | 1.498 | 1.761 |       | EN.SM.Up.12H.24H, SM.Only.Up.7D                                     |
| LOC491435  |       | 3.558 | 3.329 |       |       |       | 3.2   | 2.683 | 2.402 |       | EN.SM.Up.12H.24H, SM.Only.Up.7D                                     |
| LOC492140  |       | 1.126 | 2.592 |       |       |       | 2.951 | 2.384 | 2.21  |       | EN.SM.Up.12H.24H, SM.Only.Up.7D                                     |
| LPCAT2     |       | 1.282 | 1.795 |       |       |       | 2.486 | 2.254 | 2.818 |       | EN.SM.Up.12H.24H, SM.Only.Up.7D                                     |
| MCPH1      |       | 1.505 | 2.457 |       |       |       | 1.958 | 1.701 | 1.638 |       | EN.SM.Up.12H.24H, SM.Only.Up.7D                                     |
| ARPC2      |       | 1.64  | 1.675 | 1.513 |       |       | 2.178 |       | 1.435 |       | EN.SM.Up.12H.7D, EN.Only.Up.24H                                     |
| BPI        |       | 1.97  | 3.018 | 3.208 |       |       | 1.847 |       | 2.238 |       | EN.SM.Up.12H.7D, EN.Only.Up.24H                                     |
| BTK        |       | 1     |       |       |       |       |       |       |       |       |                                                                     |

|           |       |       |       |       |       |  |       |       |                                                   |
|-----------|-------|-------|-------|-------|-------|--|-------|-------|---------------------------------------------------|
| LMBN1     |       | 1.837 | 2.077 | 2.027 |       |  | 1.797 | 1.743 | EN.SM.Up.12H.7D, EN.Only.Up.24H                   |
| LOC476222 |       | 1.424 | 1.735 | 1.281 |       |  | 1.186 | 1.273 | EN.SM.Up.12H.7D, EN.Only.Up.24H                   |
| LOC610177 |       | 2.035 | 2.001 | 1.671 |       |  | 2.481 | 1.075 | EN.SM.Up.12H.7D, EN.Only.Up.24H                   |
| LOC612065 |       | 1.31  | 3.366 | 2.574 |       |  | 1.464 | 1.475 | EN.SM.Up.12H.7D, EN.Only.Up.24H                   |
| NID2      |       | 1.621 | 2.387 | 2.491 |       |  | 1.029 | 2.072 | EN.SM.Up.12H.7D, EN.Only.Up.24H                   |
| PCNA      |       | 1     | 1.156 | 1.124 |       |  | 1.345 | 1.295 | EN.SM.Up.12H.7D, EN.Only.Up.24H                   |
| PDIA6     |       | 1.002 | 1.224 | 1.399 |       |  | 1.171 | 1.277 | EN.SM.Up.12H.7D, EN.Only.Up.24H                   |
| PLIN2     |       | 1.806 | 1.358 | 1.424 |       |  | 1.219 | 1.25  | EN.SM.Up.12H.7D, EN.Only.Up.24H                   |
| PMPPEA1   |       | 1.932 | 1.004 | 1.772 |       |  | 1.408 | 1.777 | EN.SM.Up.12H.7D, EN.Only.Up.24H                   |
| PYCR1     |       | 2.107 | 1.664 | 1.866 |       |  | 1.294 | 2.393 | EN.SM.Up.12H.7D, EN.Only.Up.24H                   |
| RG518     |       | 3.333 | 3.002 | 2.136 |       |  | 1.841 | 2.514 | EN.SM.Up.12H.7D, EN.Only.Up.24H                   |
| SLC25A5   |       | 1.397 | 1.311 | 1.376 |       |  | 1.572 | 1.252 | EN.SM.Up.12H.7D, EN.Only.Up.24H                   |
| SLC29     |       | 1.013 | 1.239 | 1.05  |       |  | 3.822 | 2.953 | EN.SM.Up.12H.7D, EN.Only.Up.24H                   |
| STK10     |       | 1.704 | 2.195 | 1.511 |       |  | 1.8   | 1.285 | EN.SM.Up.12H.7D, EN.Only.Up.24H                   |
| TBXAS1    |       | 3.113 | 3.027 | 3.702 |       |  | 3.031 | 2.097 | EN.SM.Up.12H.7D, EN.Only.Up.24H                   |
| TCIRG1    |       | 1.383 | 1.485 | 1.681 |       |  | 1.434 | 1.114 | EN.SM.Up.12H.7D, EN.Only.Up.24H                   |
| TLR1      |       | 2.674 | 3.4   | 2.189 |       |  | 3.624 | 2.051 | EN.SM.Up.12H.7D, EN.Only.Up.24H                   |
| TLR2      |       | 3.399 | 3.509 | 2.028 |       |  | 1.012 | 1.141 | EN.SM.Up.12H.7D, EN.Only.Up.24H                   |
| TMEM173   |       | 2.818 | 3.268 | 2.93  |       |  | 1.525 | 1.553 | EN.SM.Up.12H.7D, EN.Only.Up.24H                   |
| STGAL5    | 1.87  | 1.557 |       | 2.737 |       |  | 1.39  | 1.711 | EN.SM.Up.12H.7D, EN.Only.Up.24H                   |
| FAPB5     |       | 3.227 |       | 3.387 |       |  | 1.902 | 2.781 | EN.SM.Up.12H.7D, SM.Only.Down.12H, SM.Only.Up.24H |
| ARPC1B    |       | 1.446 |       | 1.627 |       |  | 1.195 | 1.329 | EN.SM.Up.12H.7D, SM.Only.Up.24H                   |
| CAPG      |       | 2.22  |       | 3.07  |       |  | 3.162 | 2.504 | EN.SM.Up.12H.7D, SM.Only.Up.24H                   |
| CGREF1    |       | 1.964 |       | 1.58  |       |  | 3.294 | 2.973 | EN.SM.Up.12H.7D, SM.Only.Up.24H                   |
| CRIF3     |       | 1.576 |       | 1.06  |       |  | 1.32  | 1.538 | EN.SM.Up.12H.7D, SM.Only.Up.24H                   |
| EIF4A1    |       | 1.669 |       | 1.104 |       |  | 2.404 | 2.146 | EN.SM.Up.12H.7D, SM.Only.Up.24H                   |
| FSCN1     |       | 1.65  |       | 2.827 |       |  | 1.405 | 2.257 | EN.SM.Up.12H.7D, SM.Only.Up.24H                   |
| LOC481810 |       | 1.338 |       | 2.485 |       |  | 1.099 | 3.438 | EN.SM.Up.12H.7D, SM.Only.Up.24H                   |
| RIPK2     |       | 1.038 |       | 3.979 |       |  | 1.824 | 1.78  | EN.SM.Up.12H.7D, SM.Only.Up.24H                   |
| SLCSA6    |       | 2.151 |       | 1.108 |       |  | 3.809 | 3.201 | EN.SM.Up.12H.7D, SM.Only.Up.24H                   |
| TIAM2     |       | 1.696 |       | 2.058 |       |  | 1.874 | 2.082 | EN.SM.Up.12H.7D, SM.Only.Up.24H                   |
| TUBB2A    |       | 1.351 |       | 1.046 |       |  | 1.325 | 1.971 | EN.SM.Up.12H.7D, SM.Only.Up.24H                   |
| UPP1      |       | 1.201 |       | 1.571 |       |  | 1.708 | 2.191 | EN.SM.Up.12H.7D, SM.Only.Up.24H                   |
| ADK       |       |       | 1.355 | 1.576 |       |  | 2.013 | 1.65  | EN.SM.Up.24H.7D, SM.Only.Up.12H                   |
| CCDC62    |       |       | 1.121 | 1.054 |       |  | 1.749 | 1.418 | EN.SM.Up.24H.7D, SM.Only.Up.12H                   |
| OR8H4     |       |       | 1.065 | 2.551 |       |  | 1.721 | 1.613 | EN.SM.Up.24H.7D, SM.Only.Up.12H                   |
| LOC489158 |       |       | 3.979 | 2.097 |       |  | 2.282 | 3.449 | EN.SM.Up.24H.7D, SM.Only.Up.12H                   |
| MPG6      |       |       | 2.317 | 1.211 |       |  | 2.221 | 3.562 | EN.SM.Up.24H.7D, SM.Only.Up.12H                   |
| RRM2      |       |       | 4.203 | 5.576 |       |  | 1.87  | 4.157 | EN.SM.Up.24H.7D, SM.Only.Up.12H                   |
| SERPIN66  |       |       | 1.792 | 1.463 |       |  | 1.323 | 1.273 | EN.SM.Up.24H.7D, SM.Only.Up.12H                   |
| TMA5F18   |       |       | 1.588 | 1.825 |       |  | 2.669 | 2.179 | EN.SM.Up.24H.7D, SM.Only.Up.12H                   |
| KLF6      | 2.059 | 1.075 |       |       | 1.942 |  | 1.059 | 1.624 | EN.SM.Up.2H.12H, SM.Only.Up.24H                   |
| CYR61     | 1.625 | 1.293 |       | 1.408 | 2.949 |  |       | 1.03  | EN.SM.Up.2H.7D, EN.Only.Up.12H                    |
| NTF3      | 3.498 |       |       | 2.549 |       |  | 1.914 | 3.986 | EN.SM.Up.7D, SM.Only.Up.12H.24H, EN.Only.Up.2H    |
| LMO7      | 1.62  | 1.766 |       | 1.669 |       |  | 1.824 | 1.214 | EN.SM.Up.7D, SM.Only.Up.30D, EN.Only.Up.2H.12H    |
| WDR3      | 2.534 | 2.005 | 1.675 |       |       |  | 1.463 | 1.251 | SM.Only.Up.12H.24H                                |
| ITGA4     |       | 2.465 | 3.224 | 2.653 |       |  |       | 2.719 | EN.SM.Up.7D, EN.Only.Up.24H.30D                   |
| DLA-DQA1  |       | 3.44  | 2.902 | 3.968 |       |  |       | 2.558 | EN.SM.Up.7D, EN.Only.Up.24H.30D                   |
| AMICA1    |       | 1.967 | 1.797 | 2.456 |       |  | 2.28  |       | EN.SM.Up.12H, EN.Only.Up.24H.7D                   |
| CASP4     |       | 2.139 | 2.753 | 2.141 |       |  | 2.145 |       | EN.SM.Up.12H, EN.Only.Up.24H.7D                   |
| CD53      |       | 3.83  | 4.057 | 3.456 |       |  | 2.55  |       | EN.SM.Up.12H, EN.Only.Up.24H.7D                   |
| CYFH4     |       | 2.15  | 1.83  | 1.513 |       |  | 2.028 |       | EN.SM.Up.12H, EN.Only.Up.24H.7D                   |
| DOCK2     |       | 1.371 | 2.344 | 2.677 |       |  | 1.617 |       | EN.SM.Up.12H, EN.Only.Up.24H.7D                   |
| EZF3      |       | 1.299 | 1.751 | 1.874 |       |  | 1.434 |       | EN.SM.Up.12H, EN.Only.Up.24H.7D                   |
| FERMT3    |       | 1.621 | 1.7   | 1.764 |       |  | 1.339 |       | EN.SM.Up.12H, EN.Only.Up.24H.7D                   |
| FMN1      |       | 2.054 | 1.738 | 1.329 |       |  | 1.93  |       | EN.SM.Up.12H, EN.Only.Up.24H.7D                   |
| GBP1      |       | 2.552 | 2.692 | 5.088 |       |  | 1.406 |       | EN.SM.Up.12H, EN.Only.Up.24H.7D                   |
| GIMAP4    |       | 3.051 | 2.55  | 2.626 |       |  | 1.665 |       | EN.SM.Up.12H, EN.Only.Up.24H.7D                   |
| GIMAP5    |       | 2.167 | 3.27  | 2.738 |       |  | 1.876 |       | EN.SM.Up.12H, EN.Only.Up.24H.7D                   |
| GJA1      |       | 2.246 | 2.03  | 1.969 |       |  | 1.223 |       | EN.SM.Up.12H, EN.Only.Up.24H.7D                   |
| GRP137B   |       | 2.463 | 2.402 | 1.669 |       |  | 2.869 |       | EN.SM.Up.12H, EN.Only.Up.24H.7D                   |
| HPSE      |       | 3.076 | 3.501 | 2.455 |       |  | 2.58  |       | EN.SM.Up.12H, EN.Only.Up.24H.7D                   |
| HYOU1     |       | 1.518 | 1.455 | 1.561 |       |  | 1.113 |       | EN.SM.Up.12H, EN.Only.Up.24H.7D                   |
| IL18RAP   |       | 4.722 | 4.128 | 1.627 |       |  | 5.455 |       | EN.SM.Up.12H, EN.Only.Up.24H.7D                   |
| IL2RG     |       | 2.021 | 1.953 | 1.61  |       |  | 1.529 |       | EN.SM.Up.12H, EN.Only.Up.24H.7D                   |
| ITGB2     |       | 3.134 | 1.826 | 2.624 |       |  | 2.952 |       | EN.SM.Up.12H, EN.Only.Up.24H.7D                   |
| LILRB2    |       | 3.569 | 3.362 | 1.864 |       |  | 3.604 |       | EN.SM.Up.12H, EN.Only.Up.24H.7D                   |
| LOC479458 |       | 3.107 | 1.676 | 2.784 |       |  | 1.651 |       | EN.SM.Up.12H, EN.Only.Up.24H.7D                   |
| LOC480473 |       | 2.966 | 3.177 | 2.291 |       |  | 3.236 |       | EN.SM.Up.12H, EN.Only.Up.24H.7D                   |
| LOC486905 |       | 2.595 | 4.881 | 3.322 |       |  | 2.022 |       | EN.SM.Up.12H, EN.Only.Up.24H.7D                   |
| LOC611446 |       | 1.515 | 2.152 | 1.249 |       |  | 1.377 |       | EN.SM.Up.12H, EN.Only.Up.24H.7D                   |
| LY86      |       | 2.076 | 1.694 | 2.57  |       |  | 1.516 |       | EN.SM.Up.12H, EN.Only.Up.24H.7D                   |
| MYL5      |       | 1.617 | 1.761 | 1.252 |       |  | 1.012 |       | EN.SM.Up.12H, EN.Only.Up.24H.7D                   |
| NME2      |       | 2.272 | 2.083 | 1.71  |       |  | 2.806 |       | EN.SM.Up.12H, EN.Only.Up.24H.7D                   |
| OLR1      |       | 2.082 | 1.686 | 1.092 |       |  | 2.424 |       | EN.SM.Up.12H, EN.Only.Up.24H.7D                   |
| PIK3AP1   |       | 2.667 | 3.015 | 2.6   |       |  | 2.084 |       | EN.SM.Up.12H, EN.Only.Up.24H.7D                   |
| PIK3CG    |       | 3.024 | 2.013 | 1.021 |       |  | 2.965 |       | EN.SM.Up.12H, EN.Only.Up.24H.7D                   |
| PIR4      |       | 2.154 | 1.753 | 1.374 |       |  | 2.189 |       | EN.SM.Up.12H, EN.Only.Up.24H.7D                   |
| PLCB2     |       | 2.1   | 2.996 | 3.08  |       |  | 2.133 |       | EN.SM.Up.12H, EN.Only.Up.24H.7D                   |
| PREX1     |       | 2.3   | 1.953 | 1.074 |       |  | 2.005 |       | EN.SM.Up.12H, EN.Only.Up.24H.7D                   |
| RASAL3    |       | 1.778 | 1.175 | 1.127 |       |  | 2.162 |       | EN.SM.Up.12H, EN.Only.Up.24H.7D                   |
| SAMSN1    |       | 3.874 | 2.995 | 2.132 |       |  | 4.164 |       | EN.SM.Up.12H, EN.Only.Up.24H.7D                   |
| SIRPA     |       | 1.193 | 2.107 | 2.429 |       |  | 1.427 |       | EN.SM.Up.12H, EN.Only.Up.24H.7D                   |
| SLC2A6    |       | 2.267 | 1.803 | 1.321 |       |  | 1.907 |       | EN.SM.Up.12H, EN.Only.Up.24H.7D                   |
| STESHA4   |       | 2.836 | 2.62  | 1.803 |       |  | 2.885 |       | EN.SM.Up.12H, EN.Only.Up.24H.7D                   |
| SULF2     |       | 3.496 | 1.893 | 4.422 |       |  | 1.678 |       | EN.SM.Up.12H, EN.Only.Up.24H.7D                   |
| TMEM154   |       | 2.166 | 2.868 | 1.782 |       |  | 2.251 |       | EN.SM.Up.12H, EN.Only.Up.24H.7D                   |
| VAV1      |       | 1.917 | 1.68  | 1.78  |       |  | 1.81  |       | EN.SM.Up.12H, EN.Only.Up.24H.7D                   |
| VMA21     |       | 1.09  | 1.27  | 1.287 |       |  | 1.036 |       | EN.SM.Up.12H, EN.Only.Up.24H.7D                   |
| WDR37     |       | 2.534 | 2.005 | 1.675 |       |  | 2.479 |       | EN.SM.Up.12H, EN.Only.Up.24H.7D                   |
| 1-Mar     | 3.31  | 2.81  | 3.843 |       |       |  | 3.095 |       | EN.SM.Up.12H, EN.Only.Up.24H.7D                   |
| ARR6      | 1.441 | 1.93  | 2.076 |       |       |  | 1.801 |       | EN.SM.Up.12H, EN.Only.Up.24H.7D                   |
| C8BPB     | 3.353 | 1.874 | 2.276 |       |       |  | 1.963 |       | EN.SM.Up.12H, EN.Only.Up.24H.7D                   |
| CEACAM21  | 3.036 | 4.562 | 3.296 |       |       |  | 4.838 |       | EN.SM.Up.12H, EN.Only.Up.24H.7D                   |
| CSF2RA    | 2.885 | 5.131 | 4.693 |       |       |  | 4.975 |       | EN.SM.Up.12H, EN.Only.Up.24H.7D                   |
| EMP1      | 2.058 | 1.298 | 1.504 |       |       |  | 1.161 |       | EN.SM.Up.12H, EN.Only.Up.24H.7D                   |
| ERRF1     | 1.769 | 1.895 | 1.624 |       |       |  | 2.103 |       | EN.SM.Up.12H, EN.Only.Up.24H.7D                   |
| HIGD1A    | 2.233 | 1.143 | 1.133 |       |       |  | 1.33  |       | EN.SM.Up.12H, EN.Only.Up.24H.7D                   |
| IL1B      | 2.061 | 3.126 | 3.131 |       |       |  | 2.869 |       | EN.SM.Up.12H, EN.Only.Up.24H.7D                   |
| ITGAM     | 3.103 | 3.262 | 4.37  |       |       |  | 3.839 |       | EN.SM.Up.12H, EN.Only.Up.24H.7D                   |
| LOC608975 | 1.855 | 3.912 | 3.529 |       |       |  | 3.362 |       | EN.SM.Up.12H, EN.Only.Up.24H.7D                   |
| LOC611576 | 3.611 | 3.006 | 3.72  |       |       |  | 3.125 |       | EN.SM.Up.12H, EN.Only.Up.24H.7D                   |
| MCTP1     | 2.375 | 1.98  | 2.539 |       |       |  | 1.995 |       | EN.SM.Up.12H, EN.Only.Up.24H.7D                   |
| MCTP2     | 2.789 | 4.936 | 3.933 |       |       |  | 1.442 |       | EN.SM.Up.12H, EN.Only.Up.24H.7D                   |
| MXD1      | 2.392 | 2.62  | 2.444 |       |       |  | 2.664 |       | EN.SM.Up.12H, EN.Only.Up.24H.7D                   |
| NFKBID    | 4.077 | 2.044 | 2.37  |       |       |  | 2.01  |       | EN.SM.Up.12H, EN.Only.Up.24H.7D                   |
| PFFRFB3   | 2.21  | 2.173 | 1.822 |       |       |  | 1.133 |       | EN.SM.Up.12H, EN.Only.Up.24H.7D                   |
| PLBD1     | 2.998 | 2.075 | 4.7   |       |       |  | 4.07  |       | EN.SM.Up.12H, EN.Only.Up.24H.7D                   |
| PPBP      | 4.573 | 2.284 | 3.23  |       |       |  | 1.653 |       | EN.SM.Up.12H, EN.Only.Up.24H.7D                   |
| SLC2A3    | 1.992 | 1.371 | 2.29  |       |       |  | 1.325 |       | EN.SM.Up.12H, EN.Only.Up.24H.7D                   |
| TIPARP    | 3.923 | 1.323 | 1.478 |       |       |  | 2.233 |       | EN.SM.Up.12H, EN.Only.Up.24H.7D                   |
| CCL3      | 1.89  | 1.308 |       | 2.29  |       |  | 1.782 |       | EN.SM.Up.12H, EN.Only.Up.24H.7D                   |
| IER3      | 2.585 | 1.15  |       | 1.07  |       |  | 1.52  |       | EN.SM.Up.12H, EN.Only.Up.24H.7D                   |
| ETS1      | 2.883 | 1.208 |       |       |       |  | 1.968 | 2.154 | EN.SM.Up.12H, SM.Only.Up.24H, EN.Only.Up.2H       |
| HSPH5     | 1.234 | 1.764 |       |       |       |  | 2.01  | 1.875 | EN.SM.Up.12H, SM.Only.Up.24H, EN.Only.Up.2H       |
| TNFAIP6   | 2.186 | 1.729 |       |       |       |  | 2.474 | 2.458 | EN.SM.Up.12H, SM.Only.Up.24H, EN.Only.Up.2H       |
| ZFAND2A   | 2.468 | 1.598 |       |       |       |  | 1.219 | 2.58  | EN.SM.Up.12H, SM.Only.Up.24H, EN.Only.Up.2H       |
| CHD7      |       | 1.527 |       | 1.526 |       |  | 1.093 | 2.011 | EN.SM.Up.12H, SM.Only.Up.24H, EN.Only.Up.7D       |
| LOC489252 |       | 1.275 |       | 1.075 |       |  | 1.68  | 1.626 | EN.SM.Up.12H, SM.Only.Up.24H, EN.Only.Up.7D       |
| PRELID1   |       | 1.222 |       | 1.055 |       |  | 1.691 | 1.464 | EN.SM.Up.12H, SM.Only.Up.24H, EN.Only.Up.7D       |
| PROCR     |       | 1.334 |       | 1.461 |       |  | 1.786 | 2.851 | EN.SM.Up.12H, SM.Only.Up.24H, EN.Only.Up.7D       |
| CD7       |       | 1.048 |       |       |       |  | 1.048 | 2.516 | EN.SM.Up.12H, SM.Only.Up.24H.7D                   |
| DDX21     |       | 1.21  |       |       |       |  | 2.388 | 2.189 | EN.SM.Up.12H, SM.Only.Up.24H.7D                   |

|           |       |       |       |       |       |       |       |       |                                                   |
|-----------|-------|-------|-------|-------|-------|-------|-------|-------|---------------------------------------------------|
| KIF2A     |       | 1.478 |       |       |       | 1.794 | 1.594 | 1.052 | EN.SM.Up.12H, SM.Only.Up.24H.7D                   |
| LOC486736 |       | 1.104 |       |       |       | 1.209 | 3.401 | 1.095 | EN.SM.Up.12H, SM.Only.Up.24H.7D                   |
| RPL2211   |       | 1.294 |       |       |       | 1.434 | 1.939 | 1.031 | EN.SM.Up.12H, SM.Only.Up.24H.7D                   |
| SRPZ2     |       | 1.846 |       |       |       | 2.373 | 1.567 | 2.298 | EN.SM.Up.12H, SM.Only.Up.24H.7D                   |
| TYGB3     |       | 1.089 |       |       |       | 1.049 | 2.087 | 1.038 | EN.SM.Up.12H, SM.Only.Up.24H.7D                   |
| GIT2      |       | 1.602 | 2.014 |       | 2.862 | 1.047 |       |       | EN.SM.Up.12H, SM.Only.Up.2H, EN.Only.Up.24H       |
| CREM      |       | 1.592 | 3.072 |       |       | 2.024 |       | 2.212 | EN.SM.Up.12H, SM.Only.Up.7D, EN.Only.Up.24H       |
| HELLS     |       | 2.204 | 3.977 |       |       | 1.248 |       | 2.681 | EN.SM.Up.12H, SM.Only.Up.7D, EN.Only.Up.24H       |
| MAPK6     |       | 1.102 | 1.022 |       |       | 1.01  |       | 1.294 | EN.SM.Up.12H, SM.Only.Up.7D, EN.Only.Up.24H       |
| PLK3      |       | 1.578 | 1.015 |       |       | 1.512 |       | 1.747 | EN.SM.Up.12H, SM.Only.Up.7D, EN.Only.Up.24H       |
| RPS6KC1   |       | 1.238 | 1.453 |       |       | 1.017 |       | 1.081 | EN.SM.Up.12H, SM.Only.Up.7D, EN.Only.Up.24H       |
| SAE1      |       | 1.368 | 1.575 |       |       | 1.123 |       | 1.096 | EN.SM.Up.12H, SM.Only.Up.7D, EN.Only.Up.24H       |
| SLC31A2   |       | 1.33  | 1.842 |       |       | 1.822 |       | 1.327 | EN.SM.Up.12H, SM.Only.Up.7D, EN.Only.Up.24H       |
| TYFC      |       | 2.764 | 1.782 |       |       | 2.942 |       | 1.154 | EN.SM.Up.12H, SM.Only.Up.7D, EN.Only.Up.24H       |
| UBAG      |       | 1.431 | 1.109 |       |       | 1.078 |       | 1.271 | EN.SM.Up.12H, SM.Only.Up.7D, EN.Only.Up.24H       |
| ACSL4     | 1.328 | 1.944 |       |       |       | 2.428 |       | 1.663 | EN.SM.Up.12H, SM.Only.Up.7D, EN.Only.Up.2H        |
| DNAJB1    | 2.087 | 1.933 |       |       |       | 1.598 |       | 1.128 | EN.SM.Up.12H, SM.Only.Up.7D, EN.Only.Up.2H        |
| MED28     | 2.08  | 1.524 |       |       |       | 1.766 |       | 1.435 | EN.SM.Up.12H, SM.Only.Up.7D, EN.Only.Up.2H        |
| UGDH      | 2.875 | 1.462 |       |       |       | 2.13  |       | 1.058 | EN.SM.Up.12H, SM.Only.Up.7D, EN.Only.Up.2H        |
| ADORA2A   |       | 2.681 | 1.331 |       |       | 3.008 | 2.402 |       | EN.SM.Up.12H.24H                                  |
| CD68      |       | 3.977 | 3.649 |       |       | 3.975 | 2.966 |       | EN.SM.Up.12H.24H                                  |
| EIF2S1    |       | 1.262 | 1.33  |       |       | 1.603 | 1.517 |       | EN.SM.Up.12H.24H                                  |
| ESM1      |       | 3.994 | 4.886 |       |       | 4.599 | 4.251 |       | EN.SM.Up.12H.24H                                  |
| ITGB7     |       | 1.434 | 1.765 |       |       | 1.519 | 1.759 |       | EN.SM.Up.12H.24H                                  |
| LOC611593 |       | 1.049 | 1.547 |       |       | 1.099 | 1.646 |       | EN.SM.Up.12H.24H                                  |
| MANF      |       | 1.33  | 2.009 |       |       | 1.503 | 1.94  |       | EN.SM.Up.12H.24H                                  |
| NAMPT     |       | 2.03  | 2.795 |       |       | 2.759 | 2.181 |       | EN.SM.Up.12H.24H                                  |
| NDUF42    |       | 1.43  | 1.393 |       |       | 2.211 | 1.39  |       | EN.SM.Up.12H.24H                                  |
| NDUF44    |       | 1.651 | 1.397 |       |       | 1.601 | 1.758 |       | EN.SM.Up.12H.24H                                  |
| PDE4B     |       | 1.207 | 1.082 |       |       | 1.439 | 1.398 |       | EN.SM.Up.12H.24H                                  |
| PPID      |       | 1.452 | 1.34  |       |       | 1.632 | 1.692 |       | EN.SM.Up.12H.24H                                  |
| PSMD14    |       | 1.417 | 1.43  |       |       | 1.174 | 1.379 |       | EN.SM.Up.12H.24H                                  |
| RRAS2     |       | 2.005 | 1.415 |       |       | 2.461 | 1.75  |       | EN.SM.Up.12H.24H                                  |
| SDF2L1    |       | 1.585 | 1.635 |       |       | 1.1   | 1.851 |       | EN.SM.Up.12H.24H                                  |
| SIGLEC12  |       | 2.777 | 2.333 |       |       | 3.244 | 2.67  |       | EN.SM.Up.12H.24H                                  |
| SLC7A5    |       | 2.013 | 1.538 |       |       | 1.667 | 1.519 |       | EN.SM.Up.12H.24H                                  |
| SNX10     |       | 2.444 | 2.972 |       |       | 3.05  | 3.513 |       | EN.SM.Up.12H.24H                                  |
| SYPL1     |       | 2.432 | 1.882 |       |       | 3.181 | 2.064 |       | EN.SM.Up.12H.24H                                  |
| TLR4      |       | 1.238 | 1.538 |       |       | 2.132 | 2.019 |       | EN.SM.Up.12H.24H                                  |
| TMEM80    |       | 2.954 | 2.834 |       |       | 4.112 | 2.718 |       | EN.SM.Up.12H.24H                                  |
| TNIP3     |       | 4.111 | 3.558 |       |       | 4.918 | 3.252 |       | EN.SM.Up.12H.24H                                  |
| WDR12     |       | 1.393 | 1.369 |       |       | 1.86  | 1.741 |       | EN.SM.Up.12H.24H                                  |
| WDR43     |       | 1.213 | 1.193 |       |       | 1.331 | 1.482 |       | EN.SM.Up.12H.24H                                  |
| ZCCHC6    |       | 1.108 | 1.048 |       |       | 1.518 | 1.191 |       | EN.SM.Up.12H.24H                                  |
| CASP8     |       | 1.917 |       | 1.646 |       | 2.651 |       | 1.376 | EN.SM.Up.12H.7D                                   |
| FKBP11    |       | 1.622 |       | 2.006 |       | 1.982 |       | 2.399 | EN.SM.Up.12H.7D                                   |
| HN1       |       | 1.314 |       | 2.922 |       | 1.305 |       | 1.78  | EN.SM.Up.12H.7D                                   |
| LOC480469 |       | 1.269 |       | 1.81  |       | 1.377 |       | 1.731 | EN.SM.Up.12H.7D                                   |
| MTHFD1L   |       | 1.849 |       | 1.346 |       | 1.854 |       | 1.404 | EN.SM.Up.12H.7D                                   |
| NANS      |       | 1.693 |       | 1.608 |       | 2.242 |       | 1.543 | EN.SM.Up.12H.7D                                   |
| NCAPG2    |       | 1.266 |       | 2.474 |       | 1.518 |       | 2.795 | EN.SM.Up.12H.7D                                   |
| PAHA2     |       | 1.171 |       | 1.009 |       | 1.086 |       | 1.024 | EN.SM.Up.12H.7D                                   |
| PCBD2     |       | 1.026 |       | 1.111 |       | 1.283 |       | 1.138 | EN.SM.Up.12H.7D                                   |
| PLAT      |       | 2.641 |       | 1.209 |       | 1.315 |       | 1.658 | EN.SM.Up.12H.7D                                   |
| PPM1H     |       | 1.529 |       | 1.718 |       | 1.447 |       | 1.311 | EN.SM.Up.12H.7D                                   |
| RTN3      |       | 1.111 |       | 1.025 |       | 1.382 |       | 1.157 | EN.SM.Up.12H.7D                                   |
| SAA1      |       | 2.38  |       | 5.96  |       | 4.774 |       | 5.018 | EN.SM.Up.12H.7D                                   |
| TPM3      |       | 1.617 |       | 1.296 |       | 2.128 |       | 1.206 | EN.SM.Up.12H.7D                                   |
| TPX2      |       | 1.316 |       | 3.011 |       | 1.16  |       | 3.024 | EN.SM.Up.12H.7D                                   |
| TUBA4A    |       | 2.28  |       | 1.678 |       | 1.722 |       | 1.596 | EN.SM.Up.12H.7D                                   |
| CCNYL1    |       |       | 1.382 | 1.083 |       | 1.761 | 1.874 |       | EN.SM.Up.24H, SM.Only.Up.12H, EN.Only.Up.7D       |
| MRLP35    |       |       | 2.285 | 1.247 |       | 1.399 | 2.526 |       | EN.SM.Up.24H, SM.Only.Up.12H, EN.Only.Up.7D       |
| STXB2     |       |       | 1.536 | 1.469 |       | 1.295 | 1.369 |       | EN.SM.Up.24H, SM.Only.Up.12H, EN.Only.Up.7D       |
| DDX60     |       |       | 2.782 |       |       | 1.811 | 2.402 | 3.687 | EN.SM.Up.24H, SM.Only.Up.12H.7D                   |
| HTR2A     |       |       | 1.865 |       |       | 2.242 | 2.309 | 1.063 | EN.SM.Up.24H, SM.Only.Up.12H.7D                   |
| ORC1L     |       |       | 3.975 | 1.722 |       |       | 1.982 | 2.573 | EN.SM.Up.24H.7D                                   |
| CRVAB     | 2.249 | 2.589 |       |       | 2.18  | 2.301 |       |       | EN.SM.Up.2H.12H                                   |
| DUSP10    | 2.676 | 2.326 |       |       | 2.997 | 1.838 |       |       | EN.SM.Up.2H.12H                                   |
| IFRD1     | 2.152 | 1.236 |       |       | 2.063 | 1.011 |       |       | EN.SM.Up.2H.12H                                   |
| CTSC      |       | 1.1   | 1.913 | 3.666 |       |       |       | 2.992 | EN.SM.Up.7D, EN.Only.Up.12H.24H                   |
| PCK2      |       | 1.297 | 1.804 | 1.815 |       |       |       | 1.551 | EN.SM.Up.7D, EN.Only.Up.12H.24H                   |
| PRKCD     |       | 1.742 | 2.412 | 2.022 |       |       |       | 2.488 | EN.SM.Up.7D, EN.Only.Up.12H.24H                   |
| RG510     |       | 1.237 | 1.631 | 3.296 |       |       |       | 2.035 | EN.SM.Up.7D, EN.Only.Up.12H.24H                   |
| RNASEH2B  |       | 1.459 | 1.53  | 1.686 |       |       |       | 1.334 | EN.SM.Up.7D, EN.Only.Up.12H.24H                   |
| TRIM22    |       | 1.565 | 2.96  | 4.049 |       |       | 3.291 |       | EN.SM.Up.7D, EN.Only.Up.12H.24H                   |
| ANK2      |       |       | 1.186 | 1.429 |       | 2.046 |       | 1.573 | EN.SM.Up.7D, SM.Only.Up.12H, EN.Only.Up.24H       |
| ANPEP     |       |       | 1.008 | 1.174 |       | 1.886 |       | 3.241 | EN.SM.Up.7D, SM.Only.Up.12H, EN.Only.Up.24H       |
| CARHSP1   |       |       | 1.773 | 2.991 |       | 1.55  |       | 1.758 | EN.SM.Up.7D, SM.Only.Up.12H, EN.Only.Up.24H       |
| CD14      |       |       | 2.565 | 3.231 |       | 2.508 |       | 2.611 | EN.SM.Up.7D, SM.Only.Up.12H, EN.Only.Up.24H       |
| CENPK     |       |       | 2.264 | 2.234 |       | 1.69  |       | 2.841 | EN.SM.Up.7D, SM.Only.Up.12H, EN.Only.Up.24H       |
| COMMDB    |       |       | 2.31  | 1.299 |       | 1.258 |       | 1.027 | EN.SM.Up.7D, SM.Only.Up.12H, EN.Only.Up.24H       |
| CTSB      |       |       | 1.124 | 1.37  |       | 1.022 |       | 1.191 | EN.SM.Up.7D, SM.Only.Up.12H, EN.Only.Up.24H       |
| KCNE3     |       |       | 2.113 | 1.775 |       | 2.976 |       | 1.358 | EN.SM.Up.7D, SM.Only.Up.12H, EN.Only.Up.24H       |
| MC4M      |       |       | 2.019 | 1.384 |       | 1.074 |       | 1.534 | EN.SM.Up.7D, SM.Only.Up.12H, EN.Only.Up.24H       |
| SMPOD3A   |       |       | 2.052 | 4.036 |       | 1.634 |       | 2.579 | EN.SM.Up.7D, SM.Only.Up.12H, EN.Only.Up.24H       |
| WHSCL1    |       |       | 2.563 | 1.516 |       | 1.141 |       | 1.493 | EN.SM.Up.7D, SM.Only.Up.12H, EN.Only.Up.24H       |
| CHSY1     |       |       |       | 1.149 |       | 1.544 | 1.836 | 1.256 | EN.SM.Up.7D, SM.Only.Up.12H.24H                   |
| LOC475852 |       |       |       | 1.097 |       | 1.21  | 1.568 | 1.483 | EN.SM.Up.7D, SM.Only.Up.12H.24H                   |
| MELK      |       |       |       | 1.685 |       | 1.217 | 2.635 | 3.84  | EN.SM.Up.7D, SM.Only.Up.12H.24H                   |
| MT2A      |       |       |       | 2.058 |       | 1.319 | 1.705 | 1.363 | EN.SM.Up.7D, SM.Only.Up.12H.24H                   |
| RA14      |       |       |       | 1.053 |       | 1.296 | 2.079 | 1.642 | EN.SM.Up.7D, SM.Only.Up.12H.24H                   |
| YARS      |       |       |       | 1.189 |       | 1.259 | 1.853 | 1.065 | EN.SM.Up.7D, SM.Only.Up.12H.24H                   |
| KIF15     |       | 1.265 |       | 1.517 |       |       |       | 1.358 | 1.969 EN.SM.Up.7D, SM.Only.Up.30D, EN.Only.Up.12H |
| SLC27A6   | 2.363 |       | 3.89  | 2.327 |       | 1.625 |       |       | SM.Only.Up.12H, EN.Only.Up.2H.24H.7D              |
| NFKBIZ    | 3.05  |       |       |       |       | 3.215 | 2.288 | 2.246 | SM.Only.Up.12H.24H.7D, EN.Only.Up.2H              |
| SLC30A1   | 1.475 |       | 1.104 |       |       | 1.004 |       | 1.397 | SM.Only.Up.12H.7D, EN.Only.Up.2H.24H              |
| COL5A1    |       |       |       | 1.723 | 2.048 |       |       | 1.563 | EN.SM.Up.7D, EN.Only.Up.30D                       |
| COL4A1    |       |       |       | 1.447 | 2.167 |       |       | 1.38  | EN.SM.Up.7D, EN.Only.Up.30D                       |
| DNAJB13   |       |       | 3.978 |       | 2.652 | 1.582 |       |       | SM.Only.Up.12H, EN.Only.Up.24H.30D                |
| CDH2      |       |       |       | 1.189 | 3.094 | 1.071 |       |       | SM.Only.Up.12H, EN.Only.Up.7D.30D                 |
| NDC80     |       |       |       | 1.254 | 4.234 |       |       | 1.264 | EN.SM.Up.7D, EN.Only.Up.30D                       |
| DNAH11    |       |       | 1.682 | 2.01  |       |       |       | 1.637 | EN.Only.Down.7D, EN.SM.Up.7D, EN.Only.Up.24H      |
| ARF3      |       | 1.17  | 1.525 | 1.212 |       |       |       |       | EN.Only.Up.12H.24H.7D                             |
| CD37      |       | 1.214 | 1.113 | 2.114 |       |       |       |       | EN.Only.Up.12H.24H.7D                             |
| CSF1R     |       | 1.616 | 1.433 | 1.713 |       |       |       |       | EN.Only.Up.12H.24H.7D                             |
| DENND1C   |       | 1.088 | 1.732 | 1.256 |       |       |       |       | EN.Only.Up.12H.24H.7D                             |
| IL13RA    |       | 1.044 | 1.163 | 1.573 |       |       |       |       | EN.Only.Up.12H.24H.7D                             |
| LOC480726 |       | 1.116 | 1.014 | 1.01  |       |       |       |       | EN.Only.Up.12H.24H.7D                             |
| MIRP1     |       |       |       | 1.274 |       |       |       |       | EN.Only.Up.24H                                    |
| CSF3      | 1.586 |       |       |       |       | 1.044 | 1.558 |       | EN.Only.Up.24H                                    |
| ADORA3    |       | 2.374 | 2.561 |       |       | 3.118 |       |       | EN.SM.Up.12H, EN.Only.Up.24H                      |
| AGPAT9    |       | 1.494 | 2.141 |       |       | 1.646 |       |       | EN.SM.Up.12H, EN.Only.Up.24H                      |
| ANKRD22   |       | 3.496 | 2.986 |       |       | 3.895 |       |       | EN.SM.Up.12H, EN.Only.Up.24H                      |
| AOAH      |       | 3.518 | 3.906 |       |       | 3.513 |       |       | EN.SM.Up.12H, EN.Only.Up.24H                      |
| ARAP1     |       | 1.36  | 1.482 |       |       | 1.125 |       |       | EN.SM.Up.12H, EN.Only.Up.24H                      |
| BB55      |       | 1.287 | 1.077 |       |       | 1.988 |       |       | EN.SM.Up.12H, EN.Only.Up.24H                      |
| CACNB4    |       | 1.391 | 1.907 |       |       | 1.731 |       |       | EN.SM.Up.12H, EN.Only.Up.24H                      |
| CCR3      |       | 1.681 | 1.139 |       |       | 2.185 |       |       | EN.SM.Up.12H, EN.Only.Up.24H                      |
| CCRNAL    |       | 3.23  | 1.943 |       |       | 2.417 |       |       | EN.SM.Up.12H, EN.Only.Up.24H                      |
| CCT4      |       | 1.09  | 1.278 |       |       | 1.03  |       |       | EN.SM.Up.12H, EN.Only.Up.24H                      |
| CCT5      |       | 1.457 | 1.408 |       |       | 1.565 |       |       | EN.SM.Up.12H, EN.Only.Up.24H                      |
| CCT8      |       | 1.338 | 1.167 |       |       | 1.448 |       |       | EN.SM.Up.12H, EN.Only.Up.24H                      |
| CLEC4D    |       | 2.028 | 2.201 |       |       | 2.384 |       |       | EN.SM.Up.12H, EN.Only.Up.24H                      |

|           |       |       |       |  |  |       |       |       |  |                                              |
|-----------|-------|-------|-------|--|--|-------|-------|-------|--|----------------------------------------------|
| CSF2R8    |       | 1.533 | 1.378 |  |  |       | 1.767 |       |  | EN.SM.Up.12H, EN.Only.Up.24H                 |
| CYCS      |       | 1.643 | 1.354 |  |  |       | 1.803 |       |  | EN.SM.Up.12H, EN.Only.Up.24H                 |
| DPVD      |       | 2.614 | 1.773 |  |  |       | 1.576 |       |  | EN.SM.Up.12H, EN.Only.Up.24H                 |
| EFS       |       | 1.103 | 1.358 |  |  |       | 1.341 |       |  | EN.SM.Up.12H, EN.Only.Up.24H                 |
| EMR3      |       | 3.879 | 2.902 |  |  |       | 1.21  |       |  | EN.SM.Up.12H, EN.Only.Up.24H                 |
| GLPR2     |       | 1.691 | 1.999 |  |  |       | 1.484 |       |  | EN.SM.Up.12H, EN.Only.Up.24H                 |
| HCK       |       | 2.996 | 1.901 |  |  |       | 2.867 |       |  | EN.SM.Up.12H, EN.Only.Up.24H                 |
| HK3       |       | 2.551 | 2.276 |  |  |       | 1.883 |       |  | EN.SM.Up.12H, EN.Only.Up.24H                 |
| HSD17B12  |       | 1.749 | 1.247 |  |  |       | 1.273 |       |  | EN.SM.Up.12H, EN.Only.Up.24H                 |
| HSPA9     |       | 1.058 | 1.003 |  |  |       | 1.075 |       |  | EN.SM.Up.12H, EN.Only.Up.24H                 |
| IGSF2     |       | 2.453 | 2.474 |  |  |       | 2.242 |       |  | EN.SM.Up.12H, EN.Only.Up.24H                 |
| ILIA      |       | 3.245 | 3.377 |  |  |       | 3.442 |       |  | EN.SM.Up.12H, EN.Only.Up.24H                 |
| ILRAP     |       | 2.041 | 1.946 |  |  |       | 1.538 |       |  | EN.SM.Up.12H, EN.Only.Up.24H                 |
| IMP4      |       | 1.284 | 1.087 |  |  |       | 1.937 |       |  | EN.SM.Up.12H, EN.Only.Up.24H                 |
| ITGAL     |       | 2.52  | 2.725 |  |  |       | 1.599 |       |  | EN.SM.Up.12H, EN.Only.Up.24H                 |
| JRKL      |       | 1.344 | 1.832 |  |  |       | 1.104 |       |  | EN.SM.Up.12H, EN.Only.Up.24H                 |
| KCNJ15    |       | 2.912 | 1.641 |  |  |       | 3.268 |       |  | EN.SM.Up.12H, EN.Only.Up.24H                 |
| LAT2      |       | 1.704 | 1.624 |  |  |       | 1.284 |       |  | EN.SM.Up.12H, EN.Only.Up.24H                 |
| LILRB3    |       | 1.509 | 1.647 |  |  |       | 1.377 |       |  | EN.SM.Up.12H, EN.Only.Up.24H                 |
| LOC47650  |       | 1.18  | 1.257 |  |  |       | 1.328 |       |  | EN.SM.Up.12H, EN.Only.Up.24H                 |
| LOC479292 |       | 1.573 | 1.946 |  |  |       | 2.049 |       |  | EN.SM.Up.12H, EN.Only.Up.24H                 |
| LOC485452 |       | 2.08  | 1.553 |  |  |       | 1.301 |       |  | EN.SM.Up.12H, EN.Only.Up.24H                 |
| LOC491201 |       | 1.339 | 1.164 |  |  |       | 1.104 |       |  | EN.SM.Up.12H, EN.Only.Up.24H                 |
| LOC607469 |       | 1.131 | 1.412 |  |  |       | 1.005 |       |  | EN.SM.Up.12H, EN.Only.Up.24H                 |
| LOC607948 |       | 1.151 | 1.821 |  |  |       | 1.081 |       |  | EN.SM.Up.12H, EN.Only.Up.24H                 |
| LOC612137 |       | 1.5   | 1.371 |  |  |       | 1.742 |       |  | EN.SM.Up.12H, EN.Only.Up.24H                 |
| LRMP      |       | 3.094 | 3.394 |  |  |       | 2.836 |       |  | EN.SM.Up.12H, EN.Only.Up.24H                 |
| LRRCL18   |       | 2.175 | 1.486 |  |  |       | 1.502 |       |  | EN.SM.Up.12H, EN.Only.Up.24H                 |
| LYST      |       | 1.393 | 1.862 |  |  |       | 1.001 |       |  | EN.SM.Up.12H, EN.Only.Up.24H                 |
| MAPRE1    |       | 1.037 | 1.065 |  |  |       | 1.124 |       |  | EN.SM.Up.12H, EN.Only.Up.24H                 |
| MDM2      |       | 1.112 | 1.163 |  |  |       | 1.072 |       |  | EN.SM.Up.12H, EN.Only.Up.24H                 |
| MOGAT1    |       | 4.398 | 2.831 |  |  |       | 3.913 |       |  | EN.SM.Up.12H, EN.Only.Up.24H                 |
| NARG1     |       | 1.064 | 1.306 |  |  |       | 1.296 |       |  | EN.SM.Up.12H, EN.Only.Up.24H                 |
| NARS      |       | 1.379 | 1.436 |  |  |       | 1.295 |       |  | EN.SM.Up.12H, EN.Only.Up.24H                 |
| NAT10     |       | 1.3   | 1.189 |  |  |       | 1.24  |       |  | EN.SM.Up.12H, EN.Only.Up.24H                 |
| NCL       |       | 1.046 | 1.067 |  |  |       | 1.233 |       |  | EN.SM.Up.12H, EN.Only.Up.24H                 |
| NHEFC1    |       | 2.716 | 1.522 |  |  |       | 1.856 |       |  | EN.SM.Up.12H, EN.Only.Up.24H                 |
| NLRP3     |       | 1.875 | 1.638 |  |  |       | 1.49  |       |  | EN.SM.Up.12H, EN.Only.Up.24H                 |
| NUDCD1    |       | 1.228 | 1.179 |  |  |       | 1.024 |       |  | EN.SM.Up.12H, EN.Only.Up.24H                 |
| ODC1      |       | 1.408 | 1.448 |  |  |       | 1.461 |       |  | EN.SM.Up.12H, EN.Only.Up.24H                 |
| PADI4     |       | 2.755 | 1.747 |  |  |       | 2.769 |       |  | EN.SM.Up.12H, EN.Only.Up.24H                 |
| PAICS     |       | 1.716 | 1.7   |  |  |       | 1.214 |       |  | EN.SM.Up.12H, EN.Only.Up.24H                 |
| PPH       |       | 1.26  | 1.885 |  |  |       | 1.489 |       |  | EN.SM.Up.12H, EN.Only.Up.24H                 |
| PSMB2     |       | 1.031 | 1.066 |  |  |       | 1.083 |       |  | EN.SM.Up.12H, EN.Only.Up.24H                 |
| PTGER2    |       | 2.04  | 3.06  |  |  |       | 1.977 |       |  | EN.SM.Up.12H, EN.Only.Up.24H                 |
| PTPN6     |       | 2.049 | 1.514 |  |  |       | 1.702 |       |  | EN.SM.Up.12H, EN.Only.Up.24H                 |
| RASSF2    |       | 1.734 | 1.268 |  |  |       | 1.218 |       |  | EN.SM.Up.12H, EN.Only.Up.24H                 |
| RNF24     |       | 1.766 | 1.772 |  |  |       | 1.544 |       |  | EN.SM.Up.12H, EN.Only.Up.24H                 |
| SAR1B     |       | 1.428 | 1.12  |  |  |       | 1.429 |       |  | EN.SM.Up.12H, EN.Only.Up.24H                 |
| SEC61G    |       | 1.023 | 1.305 |  |  |       | 1.168 |       |  | EN.SM.Up.12H, EN.Only.Up.24H                 |
| SLC27A2   |       | 3.835 | 1.973 |  |  |       | 3.898 |       |  | EN.SM.Up.12H, EN.Only.Up.24H                 |
| SLC41A1   |       | 1.06  | 1.053 |  |  |       | 1.056 |       |  | EN.SM.Up.12H, EN.Only.Up.24H                 |
| SLC4A7    |       | 2.075 | 1.764 |  |  |       | 1.136 |       |  | EN.SM.Up.12H, EN.Only.Up.24H                 |
| SLMO2     |       | 1.171 | 1.162 |  |  |       | 1.35  |       |  | EN.SM.Up.12H, EN.Only.Up.24H                 |
| TBC1D23   |       | 1.403 | 1.143 |  |  |       | 1.102 |       |  | EN.SM.Up.12H, EN.Only.Up.24H                 |
| TGFB1     |       | 3.008 | 3.668 |  |  |       | 1.341 |       |  | EN.SM.Up.12H, EN.Only.Up.24H                 |
| TMC4      |       | 1.418 | 1.389 |  |  |       | 1.539 |       |  | EN.SM.Up.12H, EN.Only.Up.24H                 |
| TMEM183A  |       | 1.319 | 1.085 |  |  |       | 1.578 |       |  | EN.SM.Up.12H, EN.Only.Up.24H                 |
| TNIP1     |       | 1.121 | 1.284 |  |  |       | 1.611 |       |  | EN.SM.Up.12H, EN.Only.Up.24H                 |
| TRAF3IP3  |       | 2.595 | 1.397 |  |  |       | 1.149 |       |  | EN.SM.Up.12H, EN.Only.Up.24H                 |
| TSPAN8    |       | 2.041 | 3.442 |  |  |       | 1.585 |       |  | EN.SM.Up.12H, EN.Only.Up.24H                 |
| UNC45B    |       | 1.638 | 1.867 |  |  |       | 2.057 |       |  | EN.SM.Up.12H, EN.Only.Up.24H                 |
| HBEF      | 4.518 | 3     |       |  |  |       | 3.248 |       |  | EN.SM.Up.12H, EN.Only.Up.2H                  |
| HOMER1    | 2.35  | 1.165 |       |  |  |       | 1.993 |       |  | EN.SM.Up.12H, EN.Only.Up.2H                  |
| IL18R1    | 2.846 | 4.497 |       |  |  |       | 4.356 |       |  | EN.SM.Up.12H, EN.Only.Up.2H                  |
| LOC484510 | 2.468 | 1.315 |       |  |  |       | 1.301 |       |  | EN.SM.Up.12H, EN.Only.Up.2H                  |
| LOC607623 | 2.466 | 1.753 |       |  |  |       | 1.435 |       |  | EN.SM.Up.12H, EN.Only.Up.2H                  |
| LOC610734 | 2.229 | 1.783 |       |  |  |       | 1.62  |       |  | EN.SM.Up.12H, EN.Only.Up.2H                  |
| SAT1      | 1.353 | 3.377 |       |  |  |       | 1.628 |       |  | EN.SM.Up.12H, EN.Only.Up.2H                  |
| SOCS3     | 1.702 | 1.618 |       |  |  |       | 1.405 |       |  | EN.SM.Up.12H, EN.Only.Up.2H                  |
| THBS1     | 2.053 | 1.054 |       |  |  |       | 1.507 |       |  | EN.SM.Up.12H, EN.Only.Up.2H                  |
| ATOX1     | 1.143 |       | 1.941 |  |  |       | 1.02  |       |  | EN.SM.Up.12H, EN.Only.Up.7D                  |
| CA2       | 1.25  |       | 2.979 |  |  |       | 4.826 |       |  | EN.SM.Up.12H, EN.Only.Up.7D                  |
| CKX116    | 2.287 |       | 2.73  |  |  |       | 3.264 |       |  | EN.SM.Up.12H, EN.Only.Up.7D                  |
| DAPK1     | 2.283 |       | 1.611 |  |  |       | 1.63  |       |  | EN.SM.Up.12H, EN.Only.Up.7D                  |
| EMR2      | 4.599 |       | 1.804 |  |  |       | 5.134 |       |  | EN.SM.Up.12H, EN.Only.Up.7D                  |
| GPSM3     | 3.162 |       | 1.678 |  |  |       | 3.085 |       |  | EN.SM.Up.12H, EN.Only.Up.7D                  |
| ILTR      | 1.679 |       | 4.097 |  |  |       | 1.267 |       |  | EN.SM.Up.12H, EN.Only.Up.7D                  |
| LOC474756 | 1.101 |       | 1.324 |  |  |       | 1.181 |       |  | EN.SM.Up.12H, EN.Only.Up.7D                  |
| LOC474811 | 1.84  |       | 1.807 |  |  |       | 1.534 |       |  | EN.SM.Up.12H, EN.Only.Up.7D                  |
| LOC608996 | 1.577 |       | 1.309 |  |  |       | 1.059 |       |  | EN.SM.Up.12H, EN.Only.Up.7D                  |
| SELP      | 1.533 |       | 1.102 |  |  |       | 1.689 |       |  | EN.SM.Up.12H, EN.Only.Up.7D                  |
| SLC15A1   | 4.275 |       | 4.403 |  |  |       | 4.567 |       |  | EN.SM.Up.12H, EN.Only.Up.7D                  |
| UBFD3     | 1.613 |       | 1.747 |  |  |       | 1.262 |       |  | EN.SM.Up.12H, EN.Only.Up.7D                  |
| PDE4D     | 1.545 |       |       |  |  | 2.019 | 1.435 |       |  | EN.SM.Up.12H, EN.SM.Down.12H, SM.Only.Up.24H |
| ARCF1     | 1.055 |       |       |  |  |       | 1.07  | 1.388 |  | EN.SM.Up.12H, SM.Only.Up.24H                 |
| ADAMTS4   | 1.733 |       |       |  |  |       | 2.659 | 1.7   |  | EN.SM.Up.12H, SM.Only.Up.24H                 |
| DCTP1     | 1.171 |       |       |  |  |       | 1.613 | 1.866 |  | EN.SM.Up.12H, SM.Only.Up.24H                 |
| DDX47     | 1.036 |       |       |  |  |       | 1.175 | 1.387 |  | EN.SM.Up.12H, SM.Only.Up.24H                 |
| DHX37     | 1.26  |       |       |  |  |       | 1.707 | 1.556 |  | EN.SM.Up.12H, SM.Only.Up.24H                 |
| DKC1      | 1.828 |       |       |  |  |       | 1.436 | 1.554 |  | EN.SM.Up.12H, SM.Only.Up.24H                 |
| DPH3      | 1.285 |       |       |  |  |       | 1.026 | 1.486 |  | EN.SM.Up.12H, SM.Only.Up.24H                 |
| EIF3      | 1.143 |       |       |  |  |       | 1.3   | 1.908 |  | EN.SM.Up.12H, SM.Only.Up.24H                 |
| EIF4E     | 1.393 |       |       |  |  |       | 1.116 | 1.313 |  | EN.SM.Up.12H, SM.Only.Up.24H                 |
| EIF5A     | 1.636 |       |       |  |  |       | 1.445 | 1.951 |  | EN.SM.Up.12H, SM.Only.Up.24H                 |
| FFAR2     | 2.801 |       |       |  |  |       | 2.771 | 1.858 |  | EN.SM.Up.12H, SM.Only.Up.24H                 |
| FGR       | 1.285 |       |       |  |  |       | 2.798 | 1.89  |  | EN.SM.Up.12H, SM.Only.Up.24H                 |
| FTSJ3     | 1.658 |       |       |  |  |       | 2.136 | 2.354 |  | EN.SM.Up.12H, SM.Only.Up.24H                 |
| GPATCH4   | 1.405 |       |       |  |  |       | 1.909 | 1.619 |  | EN.SM.Up.12H, SM.Only.Up.24H                 |
| GRAMD1A   | 1.453 |       |       |  |  |       | 1.359 | 1.891 |  | EN.SM.Up.12H, SM.Only.Up.24H                 |
| HSPD1     | 1.332 |       |       |  |  |       | 1.23  | 1.634 |  | EN.SM.Up.12H, SM.Only.Up.24H                 |
| IL18RP    | 3.551 |       |       |  |  |       | 4.532 | 2.197 |  | EN.SM.Up.12H, SM.Only.Up.24H                 |
| INHBA     | 2.425 |       |       |  |  |       | 3.342 | 1.751 |  | EN.SM.Up.12H, SM.Only.Up.24H                 |
| LOC476306 | 3.649 |       |       |  |  |       | 3.438 | 1.701 |  | EN.SM.Up.12H, SM.Only.Up.24H                 |
| LOC477652 | 1.571 |       |       |  |  |       | 1.271 | 2.133 |  | EN.SM.Up.12H, SM.Only.Up.24H                 |
| LOC606831 | 1.993 |       |       |  |  |       | 2.351 | 2.149 |  | EN.SM.Up.12H, SM.Only.Up.24H                 |
| LOC607966 | 1.727 |       |       |  |  |       | 3     | 3.371 |  | EN.SM.Up.12H, SM.Only.Up.24H                 |
| MRPL15    | 1.139 |       |       |  |  |       | 1.044 | 1.558 |  | EN.SM.Up.12H, SM.Only.Up.24H                 |
| NIPAL4    | 1.649 |       |       |  |  |       | 1.66  | 1.715 |  | EN.SM.Up.12H, SM.Only.Up.24H                 |
| NOP2      | 1.364 |       |       |  |  |       | 1.544 | 2.379 |  | EN.SM.Up.12H, SM.Only.Up.24H                 |
| NOP58     | 1.005 |       |       |  |  |       | 1.497 | 1.601 |  | EN.SM.Up.12H, SM.Only.Up.24H                 |
| PDCD2L    | 1.505 |       |       |  |  |       | 1.52  | 1.582 |  | EN.SM.Up.12H, SM.Only.Up.24H                 |
| PI3       | 2.744 |       |       |  |  |       | 4.031 | 3.952 |  | EN.SM.Up.12H, SM.Only.Up.24H                 |
| PNO1      | 1.161 |       |       |  |  |       | 1.613 | 1.443 |  | EN.SM.Up.12H, SM.Only.Up.24H                 |
| POLR1C    | 1.064 |       |       |  |  |       | 1.435 | 1.906 |  | EN.SM.Up.12H, SM.Only.Up.24H                 |
| PTGS2     | 3.577 |       |       |  |  |       | 7.833 | 4.546 |  | EN.SM.Up.12H, SM.Only.Up.24H                 |
| PTPN22    | 2.233 |       |       |  |  |       | 2.232 | 1.703 |  | EN.SM.Up.12H, SM.Only.Up.24H                 |
| RASSF8    | 1.215 |       |       |  |  |       | 1.076 | 1.926 |  | EN.SM.Up.12H, SM.Only.Up.24H                 |
| RBM28     | 1.667 |       |       |  |  |       | 1.45  | 2.057 |  | EN.SM.Up.12H, SM.Only.Up.24H                 |
| SACS      | 1.467 |       |       |  |  |       | 1.073 | 1.714 |  | EN.SM.Up.12H, SM.Only.Up.24H                 |
| SETDB2    | 2.482 |       |       |  |  |       | 2.393 | 3.264 |  | EN.SM.Up.12H, SM.Only.Up.24H                 |
| SLC39A14  | 1.909 |       |       |  |  |       | 2.729 | 2.416 |  | EN.SM.Up.12H, SM.Only.Up.24H                 |
| STOML2    | 1.346 |       |       |  |  |       | 1.426 | 1.565 |  | EN.SM.Up.12H, SM.Only.Up.24H                 |

|            |       |       |       |       |       |       |       |       |                                               |
|------------|-------|-------|-------|-------|-------|-------|-------|-------|-----------------------------------------------|
| TMM10      |       | 1.218 |       |       |       | 1.436 | 1.41  |       | EN.SM.Up.12H, SM.Only.Up.24H                  |
| TMEM165    |       | 1.946 |       |       |       | 2.257 | 1.952 |       | EN.SM.Up.12H, SM.Only.Up.24H                  |
| TRMT6      |       | 1.734 |       |       |       | 1.048 | 1.527 |       | EN.SM.Up.12H, SM.Only.Up.24H                  |
| UGP2       |       | 1.917 |       |       |       | 1.741 | 2.335 |       | EN.SM.Up.12H, SM.Only.Up.24H                  |
| UTP6       |       | 1.006 |       |       |       | 1.319 | 1.45  |       | EN.SM.Up.12H, SM.Only.Up.24H                  |
| VAR5       |       | 1.195 |       |       |       | 1.526 | 1.372 |       | EN.SM.Up.12H, SM.Only.Up.24H                  |
| WOR77      |       | 2.031 |       |       |       | 1.461 | 1.827 |       | EN.SM.Up.12H, SM.Only.Up.24H                  |
| ZNF593     |       | 1.662 |       |       |       | 2.148 | 2.266 |       | EN.SM.Up.12H, SM.Only.Up.24H                  |
| BA61       |       | 1.158 |       |       |       | 1.121 | 1.092 |       | EN.SM.Up.12H, SM.Only.Up.7D                   |
| CYTIP      |       | 1.527 |       |       |       | 4.752 | 1.564 |       | EN.SM.Up.12H, SM.Only.Up.7D                   |
| EEF1E1     |       | 1.204 |       |       |       | 1.155 | 1.329 |       | EN.SM.Up.12H, SM.Only.Up.7D                   |
| EF2B1      |       | 1.045 |       |       |       | 1.106 | 1.17  |       | EN.SM.Up.12H, SM.Only.Up.7D                   |
| GPRC5A     |       | 2.139 |       |       |       | 3.234 | 1.168 |       | EN.SM.Up.12H, SM.Only.Up.7D                   |
| LOC474923  |       | 1.316 |       |       |       | 1.157 | 1.127 |       | EN.SM.Up.12H, SM.Only.Up.7D                   |
| LOC610769  |       | 1.127 |       |       |       | 1.106 | 1.574 |       | EN.SM.Up.12H, SM.Only.Up.7D                   |
| MRP510     |       | 1.819 |       |       |       | 1.045 | 1.513 |       | EN.SM.Up.12H, SM.Only.Up.7D                   |
| MYD88      |       | 1.079 |       |       |       | 1.47  | 1.162 |       | EN.SM.Up.12H, SM.Only.Up.7D                   |
| PLK2       |       | 1.524 |       |       |       | 1.465 | 1.517 |       | EN.SM.Up.12H, SM.Only.Up.7D                   |
| SGMS1      |       | 1.082 |       |       |       | 1.381 | 1.13  |       | EN.SM.Up.12H, SM.Only.Up.7D                   |
| SLC38A1    |       | 1.639 |       |       |       | 1.007 | 1.029 |       | EN.SM.Up.12H, SM.Only.Up.7D                   |
| SLC39A6    |       | 1.1   |       |       |       | 1.609 | 1.146 |       | EN.SM.Up.12H, SM.Only.Up.7D                   |
| SPC33      |       | 1.071 |       |       |       | 1.118 | 1.305 |       | EN.SM.Up.12H, SM.Only.Up.7D                   |
| TPM4       |       | 1.563 |       |       |       | 2.321 | 1.426 |       | EN.SM.Up.12H, SM.Only.Up.7D                   |
| BXDC1      |       |       | 1.103 |       |       | 1.19  | 1.345 |       | EN.SM.Up.24H, SM.Only.Up.12H                  |
| HNRPD      |       |       | 1.16  |       |       | 1.68  | 1.378 |       | EN.SM.Up.24H, SM.Only.Up.12H                  |
| LOC478538  |       |       | 1.228 |       |       | 1.631 | 1.867 |       | EN.SM.Up.24H, SM.Only.Up.12H                  |
| LOC480615  |       |       | 1.229 |       |       | 1.295 | 1.439 |       | EN.SM.Up.24H, SM.Only.Up.12H                  |
| LOC483150  |       |       | 1.787 |       |       | 1.113 | 1.679 |       | EN.SM.Up.24H, SM.Only.Up.12H                  |
| POLR2D     |       |       | 1.464 |       |       | 1.295 | 2.103 |       | EN.SM.Up.24H, SM.Only.Up.12H                  |
| SLC7A11    |       |       | 2.044 |       |       | 2.52  | 2.019 |       | EN.SM.Up.24H, SM.Only.Up.12H                  |
| STK38L     | 2.023 | 1.446 |       |       | 1.545 |       |       |       | EN.SM.Up.2H, EN.Only.Up.12H                   |
| LRP2       | 2.656 |       | 1.466 |       | 3.11  |       |       |       | EN.SM.Up.2H, EN.Only.Up.24H                   |
| BDNF       | 3.584 |       |       | 1.405 | 3.091 |       |       |       | EN.SM.Up.2H, EN.Only.Up.7D                    |
| DCUN1D3    | 1.839 |       |       |       | 2.183 | 1.483 |       |       | EN.SM.Up.2H, SM.Only.Up.12H                   |
| DUSP14     | 2.203 |       |       |       | 2.874 | 1.026 |       |       | EN.SM.Up.2H, SM.Only.Up.12H                   |
| GCH1       | 2.537 |       |       |       | 1.917 | 3.456 |       |       | EN.SM.Up.2H, SM.Only.Up.12H                   |
| NFKB1      | 2.331 |       |       |       | 2.434 | 1.02  |       |       | EN.SM.Up.2H, SM.Only.Up.12H                   |
|            | 5-Sep | 1.021 | 1.799 |       |       |       | 1.171 |       | EN.SM.Up.7D, EN.Only.Up.12H                   |
| DBF4       |       | 1.188 | 1.23  |       |       |       | 1.678 |       | EN.SM.Up.7D, EN.Only.Up.12H                   |
| GNPDA1     |       | 1.256 | 1.12  |       |       |       | 1.52  |       | EN.SM.Up.7D, EN.Only.Up.12H                   |
| LOC486254  |       | 1.479 | 2.063 |       |       |       | 2.532 |       | EN.SM.Up.7D, EN.Only.Up.12H                   |
| LOC606770  |       | 1.254 | 1.1   |       |       |       | 1.213 |       | EN.SM.Up.7D, EN.Only.Up.12H                   |
| LRR8C      |       | 1.432 | 1.001 |       |       |       | 1.877 |       | EN.SM.Up.7D, EN.Only.Up.12H                   |
| PRF8       |       | 1.049 | 1.446 |       |       |       | 1.076 |       | EN.SM.Up.7D, EN.Only.Up.12H                   |
| TGFBF1     |       | 1.148 | 1.87  |       |       |       | 1.284 |       | EN.SM.Up.7D, EN.Only.Up.12H                   |
| TNFSF13B   |       | 1.137 | 1.87  |       |       |       | 1.372 |       | EN.SM.Up.7D, EN.Only.Up.12H                   |
| ADAP2      |       |       | 1.705 | 2.765 |       |       | 1.65  |       | EN.SM.Up.7D, EN.Only.Up.24H                   |
| CD86       |       |       | 2.286 | 2.966 |       |       | 1.958 |       | EN.SM.Up.7D, EN.Only.Up.24H                   |
| CDC6       |       |       | 2.828 | 1.13  |       |       | 2.885 |       | EN.SM.Up.7D, EN.Only.Up.24H                   |
| CENPH      |       |       | 1.422 | 2.934 |       |       | 3.386 |       | EN.SM.Up.7D, EN.Only.Up.24H                   |
| CTS5       |       |       | 2.046 | 3.608 |       |       | 2.071 |       | EN.SM.Up.7D, EN.Only.Up.24H                   |
| DB1        |       |       | 1.329 | 1.607 |       |       | 1.223 |       | EN.SM.Up.7D, EN.Only.Up.24H                   |
| DLA-DRB1   |       |       | 2.776 | 3.185 |       |       | 2.539 |       | EN.SM.Up.7D, EN.Only.Up.24H                   |
| FEN1       |       |       | 2.059 | 1.56  |       |       | 1.44  |       | EN.SM.Up.7D, EN.Only.Up.24H                   |
| LCTL       |       |       | 1.32  | 1.247 |       |       | 1.81  |       | EN.SM.Up.7D, EN.Only.Up.24H                   |
| LMAN1      |       |       | 1.294 | 1.292 |       |       | 1.624 |       | EN.SM.Up.7D, EN.Only.Up.24H                   |
| LOC476669  |       |       | 1.414 | 2.468 |       |       | 1.503 |       | EN.SM.Up.7D, EN.Only.Up.24H                   |
| LOC607827  |       |       | 1.733 | 1.805 |       |       | 2.144 |       | EN.SM.Up.7D, EN.Only.Up.24H                   |
| LOC607964  |       |       | 1.656 | 1.438 |       |       | 2.36  |       | EN.SM.Up.7D, EN.Only.Up.24H                   |
| LOC610710  |       |       | 3.99  | 1.632 |       |       | 1.391 |       | EN.SM.Up.7D, EN.Only.Up.24H                   |
| LOC613005  |       |       | 1.669 | 2.338 |       |       | 1.99  |       | EN.SM.Up.7D, EN.Only.Up.24H                   |
| LRR4C6     |       |       | 1.295 | 1.951 |       |       | 2.027 |       | EN.SM.Up.7D, EN.Only.Up.24H                   |
| LTBP3      |       |       | 1.459 | 2.235 |       |       | 2.396 |       | EN.SM.Up.7D, EN.Only.Up.24H                   |
| MCM3       |       |       | 1.583 | 1.709 |       |       | 1.299 |       | EN.SM.Up.7D, EN.Only.Up.24H                   |
| MCM5       |       |       | 1.57  | 1.356 |       |       | 1.848 |       | EN.SM.Up.7D, EN.Only.Up.24H                   |
| MCM6       |       |       | 1.392 | 1.88  |       |       | 2.641 |       | EN.SM.Up.7D, EN.Only.Up.24H                   |
| MMDA       |       |       | 2.047 | 1.224 |       |       | 1.749 |       | EN.SM.Up.7D, EN.Only.Up.24H                   |
| MYD1B      |       |       | 1.847 | 1.979 |       |       | 2.203 |       | EN.SM.Up.7D, EN.Only.Up.24H                   |
| ORCL       |       |       | 2.459 | 2.322 |       |       | 2.132 |       | EN.SM.Up.7D, EN.Only.Up.24H                   |
| P4HB       |       |       | 1.59  | 1.322 |       |       | 1.353 |       | EN.SM.Up.7D, EN.Only.Up.24H                   |
| PBK        |       |       | 1.306 | 1.515 |       |       | 1.762 |       | EN.SM.Up.7D, EN.Only.Up.24H                   |
| PPT1       |       |       | 1.119 | 1.299 |       |       | 1.135 |       | EN.SM.Up.7D, EN.Only.Up.24H                   |
| RAD51      |       |       | 2.345 | 2.876 |       |       | 3.121 |       | EN.SM.Up.7D, EN.Only.Up.24H                   |
| RAD51AP1   |       |       | 1.949 | 2.693 |       |       | 2.694 |       | EN.SM.Up.7D, EN.Only.Up.24H                   |
| RPN2       |       |       | 1.079 | 1.082 |       |       | 1.105 |       | EN.SM.Up.7D, EN.Only.Up.24H                   |
| SPC25      |       |       | 1.338 | 2.815 |       |       | 2.203 |       | EN.SM.Up.7D, EN.Only.Up.24H                   |
| SQLE       |       |       | 1.993 | 2.54  |       |       | 2.411 |       | EN.SM.Up.7D, EN.Only.Up.24H                   |
| STEAP1     |       |       | 1.266 | 1.888 |       |       | 1.567 |       | EN.SM.Up.7D, EN.Only.Up.24H                   |
| STIL       |       |       | 1.674 | 1.785 |       |       | 1.834 |       | EN.SM.Up.7D, EN.Only.Up.24H                   |
| UCP2       |       |       | 2.32  | 3.023 |       |       | 2.134 |       | EN.SM.Up.7D, EN.Only.Up.24H                   |
| VCAM1      |       |       | 1.572 | 1.938 |       |       | 1.733 |       | EN.SM.Up.7D, EN.Only.Up.24H                   |
| UBE2C      | 2.459 |       |       | 3.669 |       |       | 3.139 |       | EN.SM.Up.7D, EN.Only.Up.2H                    |
| SURF4      |       |       |       | 1.034 |       | 1.391 | 1.047 |       | EN.SM.Up.7D, SM.Only.Down.12H, SM.Only.Up.12H |
| ARPC5      |       |       |       | 1.046 |       | 1.223 | 1.053 |       | EN.SM.Up.7D, SM.Only.Up.12H                   |
| CBF8       |       |       |       | 1.118 |       | 1.09  | 1.021 |       | EN.SM.Up.7D, SM.Only.Up.12H                   |
| CIAPIN1    |       |       |       | 1.217 |       | 1.081 | 1.047 |       | EN.SM.Up.7D, SM.Only.Up.12H                   |
| CTSB       |       |       |       | 1.809 |       | 1.135 | 1.235 |       | EN.SM.Up.7D, SM.Only.Up.12H                   |
| CXCL14     |       |       |       | 2.256 |       | 1.293 | 1.873 |       | EN.SM.Up.7D, SM.Only.Up.12H                   |
| EDEM2      |       |       |       | 1.279 |       | 1.021 | 1.569 |       | EN.SM.Up.7D, SM.Only.Up.12H                   |
| ENTPD7     |       |       |       | 1.411 |       | 1.933 | 2.128 |       | EN.SM.Up.7D, SM.Only.Up.12H                   |
| FBX05      |       |       |       | 2.069 |       | 1.124 | 1.991 |       | EN.SM.Up.7D, SM.Only.Up.12H                   |
| GJA1       |       |       |       | 1.021 |       | 1.776 | 1.521 |       | EN.SM.Up.7D, SM.Only.Up.12H                   |
| IFMAR1     |       |       |       | 1.046 |       | 1.098 | 1.533 |       | EN.SM.Up.7D, SM.Only.Up.12H                   |
| IL12A      |       |       |       | 1.331 |       | 3.001 | 1.639 |       | EN.SM.Up.7D, SM.Only.Up.12H                   |
| KBTBD8     |       |       |       | 1.483 |       | 1.223 | 1.078 |       | EN.SM.Up.7D, SM.Only.Up.12H                   |
| LGALS9     |       |       |       | 2.059 |       | 1.844 | 3.624 |       | EN.SM.Up.7D, SM.Only.Up.12H                   |
| LOC475202  |       |       |       | 1.281 |       | 1.4   | 1.182 |       | EN.SM.Up.7D, SM.Only.Up.12H                   |
| LTBR       |       |       |       | 3.823 |       | 1.338 | 1.143 |       | EN.SM.Up.7D, SM.Only.Up.12H                   |
| MAP4K4     |       |       |       | 1.37  |       | 1.024 | 1.186 |       | EN.SM.Up.7D, SM.Only.Up.12H                   |
| OLFM1      |       |       |       | 2.098 |       | 1.301 | 3.456 |       | EN.SM.Up.7D, SM.Only.Up.12H                   |
| PP1B       |       |       |       | 1.191 |       | 1.058 | 1.244 |       | EN.SM.Up.7D, SM.Only.Up.12H                   |
| SHMT2      |       |       |       | 1.477 |       | 1.021 | 1.328 |       | EN.SM.Up.7D, SM.Only.Up.12H                   |
| SLC37A2    |       |       |       | 2.042 |       | 1.142 | 1.046 |       | EN.SM.Up.7D, SM.Only.Up.12H                   |
| SNHG3-RCC1 |       |       |       | 1.128 |       | 1.105 | 1.539 |       | EN.SM.Up.7D, SM.Only.Up.12H                   |
| KDEL1      |       |       |       | 1.432 |       |       | 1.248 | 1.521 | EN.SM.Up.7D, SM.Only.Up.24H                   |
| SRPX       |       |       |       | 1.576 |       |       | 1.268 | 1.646 | EN.SM.Up.7D, SM.Only.Up.24H                   |
| COL29A1    |       |       |       | 3.316 |       |       | 4.474 | 3.672 | EN.SM.Up.7D, SM.Only.Up.30D                   |
| LOC484897  |       |       |       | 5.497 |       |       | 3.196 | 3.475 | EN.SM.Up.7D, SM.Only.Up.30D                   |
| SFRP2      |       |       |       | 4.463 |       |       | 4.012 | 5.699 | EN.SM.Up.7D, SM.Only.Up.30D                   |
| CD274      |       | 1.656 | 2.079 |       | 1.228 |       |       |       | SM.Only.Up.12H, EN.Only.Up.24H,7D             |
| EMR4P      |       | 2.071 | 1.753 |       | 2.327 |       |       |       | SM.Only.Up.12H, EN.Only.Up.24H,7D             |
| FOLR2      |       | 2.186 | 2.266 |       | 1.083 |       |       |       | SM.Only.Up.12H, EN.Only.Up.24H,7D             |
| GEMIN4     |       | 1.532 | 1.178 |       | 1.639 |       |       |       | SM.Only.Up.12H, EN.Only.Up.24H,7D             |
| MAP2K3     |       | 1.762 | 1.001 |       | 1.611 |       |       |       | SM.Only.Up.12H, EN.Only.Up.24H,7D             |
| PID1       |       | 1.665 | 2.219 |       | 1.282 |       |       |       | SM.Only.Up.12H, EN.Only.Up.24H,7D             |
| PP4I       |       | 1.553 | 1.176 |       | 1.998 |       |       |       | SM.Only.Up.12H, EN.Only.Up.24H,7D             |
| REL        |       | 3.006 | 1.708 |       | 2.389 |       |       |       | SM.Only.Up.12H, EN.Only.Up.24H,7D             |
| RHOG       |       | 1.417 | 1.555 |       | 1.057 |       |       |       | SM.Only.Up.12H, EN.Only.Up.24H,7D             |
| RPS20      |       | 1.005 | 1.034 |       | 1.454 |       |       |       | SM.Only.Up.12H, EN.Only.Up.24H,7D             |
| SLC9A3R1   |       | 1.927 | 2.244 |       | 1.903 |       |       |       | SM.Only.Up.12H, EN.Only.Up.24H,7D             |
| SSH2       |       | 2.74  | 1.305 |       | 1.541 |       |       |       | SM.Only.Up.12H, EN.Only.Up.24H,7D             |
| EREG       | 3.307 |       |       |       | 1.948 | 2.713 |       |       | SM.Only.Up.12H,24H, EN.Only.Up.2H             |
| MYC        | 3.064 |       |       |       | 2.41  | 1.703 |       |       | SM.Only.Up.12H,24H, EN.Only.Up.2H             |



|           |       |       |       |       |       |  |       |       |       |       |       |                                   |
|-----------|-------|-------|-------|-------|-------|--|-------|-------|-------|-------|-------|-----------------------------------|
| ATP1A1    |       |       |       | 1.414 |       |  | 2.345 | 1.887 |       |       |       | SM.Only.Up.12H.24H, EN.Only.Up.7D |
| LOC480628 |       |       |       | 1.333 |       |  | 1.126 | 3.64  |       |       |       | SM.Only.Up.12H.24H, EN.Only.Up.7D |
| LOC608876 |       |       |       | 1.013 |       |  | 1.457 | 1.417 |       |       |       | SM.Only.Up.12H.24H, EN.Only.Up.7D |
| LOC612666 |       |       |       | 1.07  |       |  | 1.881 | 2.024 |       |       |       | SM.Only.Up.12H.24H, EN.Only.Up.7D |
| NOP10     |       |       |       | 1.134 |       |  | 1.292 | 1.764 |       |       |       | SM.Only.Up.12H.24H, EN.Only.Up.7D |
| PDGFRA    |       |       |       | 2.542 |       |  | 1.255 | 2.434 |       |       |       | SM.Only.Up.12H.24H, EN.Only.Up.7D |
| SLC13A5   |       |       |       | 1.04  |       |  | 2.062 | 1.337 |       |       |       | SM.Only.Up.12H.24H, EN.Only.Up.7D |
| TMEFF2    |       |       |       | 1.729 |       |  | 1.435 | 2.081 |       |       |       | SM.Only.Up.12H.24H, EN.Only.Up.7D |
| TNFRSF1A  |       |       |       | 1.355 |       |  | 1.682 | 2.624 |       |       |       | SM.Only.Up.12H.24H, EN.Only.Up.7D |
| ABCC4     |       |       |       |       |       |  | 1.222 | 2.24  |       | 1.6   |       | SM.Only.Up.12H.24H.7D             |
| ACY1      |       |       |       |       |       |  | 1.958 | 1.543 |       | 1.518 |       | SM.Only.Up.12H.24H.7D             |
| AK7       |       |       |       |       |       |  | 2.914 | 2.454 |       | 2.932 |       | SM.Only.Up.12H.24H.7D             |
| DPF4      |       |       |       |       |       |  | 1.755 | 2.392 |       | 2.472 |       | SM.Only.Up.12H.24H.7D             |
| ENOPH1    |       |       |       |       |       |  | 1.639 | 2.385 |       | 1.671 |       | SM.Only.Up.12H.24H.7D             |
| LAMB1     |       |       |       |       |       |  | 1.262 | 1.641 |       | 1.798 |       | SM.Only.Up.12H.24H.7D             |
| RRBP1     |       |       |       |       |       |  | 1.271 | 1.4   |       | 1.454 |       | SM.Only.Up.12H.24H.7D             |
| TPBG      |       |       |       |       |       |  | 1.312 | 2.392 |       | 2.646 |       | SM.Only.Up.12H.24H.7D             |
| TLL12     |       |       |       |       |       |  | 1.256 | 1.567 |       | 2.683 |       | SM.Only.Up.12H.24H.7D             |
| FO5B      | 4.367 |       |       |       |       |  | 1.312 |       |       |       | 4.292 | SM.Only.Up.12H.30D, EN.Only.Up.2H |
| DNAJC14   |       |       |       | 1.386 |       |  | 1.062 |       |       | 1.046 |       | SM.Only.Up.12H.7D, EN.Only.Up.24H |
| DPF3      |       |       |       | 1.482 |       |  | 1.071 |       |       | 1.378 |       | SM.Only.Up.12H.7D, EN.Only.Up.24H |
| GARS      |       |       |       | 1.907 |       |  | 1.454 |       |       | 1.291 |       | SM.Only.Up.12H.7D, EN.Only.Up.24H |
| LBR       |       |       |       | 1.197 |       |  | 1.346 |       |       | 1.135 |       | SM.Only.Up.12H.7D, EN.Only.Up.24H |
| LDHA      |       |       |       | 1.221 |       |  | 1.264 |       |       | 1.135 |       | SM.Only.Up.12H.7D, EN.Only.Up.24H |
| LOC609892 |       |       |       | 2.248 |       |  | 1.469 |       |       | 1.363 |       | SM.Only.Up.12H.7D, EN.Only.Up.24H |
| OASL      |       |       |       | 1.249 |       |  | 1.076 |       |       | 1.168 |       | SM.Only.Up.12H.7D, EN.Only.Up.24H |
| PIK3CB    |       |       |       | 1.733 |       |  | 1.059 |       |       | 1.181 |       | SM.Only.Up.12H.7D, EN.Only.Up.24H |
| RAB20     |       |       |       | 2.362 |       |  | 3.546 |       |       | 4.693 |       | SM.Only.Up.12H.7D, EN.Only.Up.24H |
| RNF144B   |       |       |       | 2.364 |       |  | 1.554 |       |       | 1.801 |       | SM.Only.Up.12H.7D, EN.Only.Up.24H |
| IAK2      | 1.257 |       |       |       |       |  | 1.097 |       |       | 1.092 |       | SM.Only.Up.12H.7D, EN.Only.Up.2H  |
| SDF2      |       | 1.585 | 1.635 |       |       |  |       |       |       | 1.151 |       | SM.Only.Up.7D                     |
| TM4SF1    |       | 1.588 |       | 1.825 |       |  |       |       |       | 3.611 |       | SM.Only.Up.7D                     |
| LOC612129 |       | 2.512 | 3.804 |       |       |  |       |       |       | 2.434 |       | SM.Only.Up.7D, EN.Only.Up.12H.24H |
| SMS       |       | 1.035 | 1.379 |       |       |  |       |       |       | 1.043 |       | SM.Only.Up.7D, EN.Only.Up.12H.24H |
| DCN       |       |       |       | 1.481 | 2.486 |  |       |       |       |       |       | EN.Only.Up.7D.30D                 |
| ECM1      |       |       |       | 1.765 | 2.717 |  |       |       |       |       |       | EN.Only.Up.7D.30D                 |
| BMPER     |       |       |       | 5.048 | 3.143 |  |       |       |       |       |       | EN.Only.Up.7D.30D                 |
| LOC478566 |       |       |       | 2.035 | 4.195 |  |       |       |       |       |       | EN.Only.Up.7D.30D                 |
| KRT18     |       |       |       | 4.832 | 4.299 |  |       |       |       |       |       | EN.Only.Up.7D.30D                 |
| ARRB2     | 1.204 | 1.457 |       |       |       |  |       |       |       |       |       | EN.Only.Up.12H.24H                |
| CBWD2     | 1.445 | 1.976 |       |       |       |  |       |       |       |       |       | EN.Only.Up.12H.24H                |
| EIF4EBP1  | 1.259 | 2.245 |       |       |       |  |       |       |       |       |       | EN.Only.Up.12H.24H                |
| GIMAP7    | 2.401 | 2.431 |       |       |       |  |       |       |       |       |       | EN.Only.Up.12H.24H                |
| IMALL     | 1.18  | 1.235 |       |       |       |  |       |       |       |       |       | EN.Only.Up.12H.24H                |
| MGST1     | 2.367 | 2.367 |       |       |       |  |       |       |       |       |       | EN.Only.Up.12H.24H                |
| OPRM1     | 1.793 | 1.549 |       |       |       |  |       |       |       |       |       | EN.Only.Up.12H.24H                |
| PRKAR2A   | 1.249 | 1.112 |       |       |       |  |       |       |       |       |       | EN.Only.Up.12H.24H                |
| SERPINB10 | 1.821 | 2.261 |       |       |       |  |       |       |       |       |       | EN.Only.Up.12H.24H                |
| SLC12A2   | 1.587 | 1.703 |       |       |       |  |       |       |       |       |       | EN.Only.Up.12H.24H                |
| STEAP2    | 1.618 | 2.766 |       |       |       |  |       |       |       |       |       | EN.Only.Up.12H.24H                |
| SVT10     | 3.114 | 2.581 |       |       |       |  |       |       |       |       |       | EN.Only.Up.12H.24H                |
| TSPAN5    | 1.068 | 1.143 |       |       |       |  |       |       |       |       |       | EN.Only.Up.12H.24H                |
| XYLT1     | 1.402 | 1.042 |       |       |       |  |       |       |       |       |       | EN.Only.Up.12H.24H                |
| ARPC5L    | 1.06  |       | 1.429 |       |       |  |       |       |       |       |       | EN.Only.Up.12H.7D                 |
| ATG4D     | 1.07  |       | 1.321 |       |       |  |       |       |       |       |       | EN.Only.Up.12H.7D                 |
| FRMD4A    | 1.088 |       | 1.346 |       |       |  |       |       |       |       |       | EN.Only.Up.12H.7D                 |
| LACTB     | 1.007 |       | 1.258 |       |       |  |       |       |       |       |       | EN.Only.Up.12H.7D                 |
| NTN4      | 1.236 |       | 1.704 |       |       |  |       |       |       |       |       | EN.Only.Up.12H.7D                 |
| SEC61A1   | 1.125 |       | 1.25  |       |       |  |       |       |       |       |       | EN.Only.Up.12H.7D                 |
| SERPINB8  | 1.179 |       | 1.662 |       |       |  |       |       |       |       |       | EN.Only.Up.12H.7D                 |
| SLC26A11  | 1.078 |       | 1.25  |       |       |  |       |       |       |       |       | EN.Only.Up.12H.7D                 |
| VAV3      | 2.004 |       | 1.499 |       |       |  |       |       |       |       |       | EN.Only.Up.12H.7D                 |
| CDCA7     |       | 2.627 |       |       |       |  |       |       | 1.327 |       |       | EN.Only.Up.24H                    |
| AHCY      |       | 1.524 | 1.487 |       |       |  |       |       |       |       |       | EN.Only.Up.24H.7D                 |
| BMP2K     |       | 1.688 | 1.096 |       |       |  |       |       |       |       |       | EN.Only.Up.24H.7D                 |
| CCRS      |       | 1.892 | 1.633 |       |       |  |       |       |       |       |       | EN.Only.Up.24H.7D                 |
| CD83      |       | 1.15  | 1.204 |       |       |  |       |       |       |       |       | EN.Only.Up.24H.7D                 |
| DIA-DQB1  |       | 2.166 | 3.371 |       |       |  |       |       |       |       |       | EN.Only.Up.24H.7D                 |
| EZH2      |       | 1.602 | 1.509 |       |       |  |       |       |       |       |       | EN.Only.Up.24H.7D                 |
| LOC480602 |       | 3.161 | 4.27  |       |       |  |       |       |       |       |       | EN.Only.Up.24H.7D                 |
| LOC484249 |       | 2.445 | 2.347 |       |       |  |       |       |       |       |       | EN.Only.Up.24H.7D                 |
| MASTL     |       | 1.136 | 1.716 |       |       |  |       |       |       |       |       | EN.Only.Up.24H.7D                 |
| MCM10     |       | 2.016 | 2.302 |       |       |  |       |       |       |       |       | EN.Only.Up.24H.7D                 |
| MMP14     |       | 1.403 | 1.231 |       |       |  |       |       |       |       |       | EN.Only.Up.24H.7D                 |
| MSA47     |       | 2.182 | 2.029 |       |       |  |       |       |       |       |       | EN.Only.Up.24H.7D                 |
| NAGA      |       | 1.175 | 1.327 |       |       |  |       |       |       |       |       | EN.Only.Up.24H.7D                 |
| PCOLCE2   |       | 2.116 | 2.126 |       |       |  |       |       |       |       |       | EN.Only.Up.24H.7D                 |
| PDIA3     |       | 1.311 | 1.009 |       |       |  |       |       |       |       |       | EN.Only.Up.24H.7D                 |
| PDIA4     |       | 1.449 | 1.244 |       |       |  |       |       |       |       |       | EN.Only.Up.24H.7D                 |
| PGAM1     |       | 1.679 | 1.152 |       |       |  |       |       |       |       |       | EN.Only.Up.24H.7D                 |
| SFRP5     |       | 1.253 | 2.309 |       |       |  |       |       |       |       |       | EN.Only.Up.24H.7D                 |
| SLC26A2   |       | 2.253 | 1.511 |       |       |  |       |       |       |       |       | EN.Only.Up.24H.7D                 |
| TCN2      |       | 1.346 | 1.735 |       |       |  |       |       |       |       |       | EN.Only.Up.24H.7D                 |
| TFC       |       | 2.059 | 2.16  |       |       |  |       |       |       |       |       | EN.Only.Up.24H.7D                 |
| UST       |       |       | 1.979 | 1.728 |       |  |       |       |       |       |       | EN.Only.Up.24H.7D                 |
| ATF3      | 5.068 | 2.657 |       |       |       |  |       |       |       |       |       | EN.Only.Up.2H.12H                 |
| ATXN7     | 1.947 | 1.285 |       |       |       |  |       |       |       |       |       | EN.Only.Up.2H.12H                 |
| RCAN1     | 3.352 | 1.545 |       |       |       |  |       |       |       |       |       | EN.Only.Up.2H.12H                 |
| ZMYND8    | 1.625 |       | 1.239 |       |       |  |       |       |       |       |       | EN.Only.Up.2H.7D                  |
| AATF      |       | 1.273 |       |       |       |  |       | 1.065 |       |       |       | EN.SM.Up.12H                      |
| ABCE1     |       | 1.245 |       |       |       |  |       | 1.397 |       |       |       | EN.SM.Up.12H                      |
| ABCF2     |       | 1.225 |       |       |       |  |       | 1.285 |       |       |       | EN.SM.Up.12H                      |
| ACTR8     |       | 1.084 |       |       |       |  |       | 1.423 |       |       |       | EN.SM.Up.12H                      |
| ADAMTS9   |       | 2.249 |       |       |       |  |       | 3.359 |       |       |       | EN.SM.Up.12H                      |
| ADSL      |       | 1.434 |       |       |       |  |       | 1.349 |       |       |       | EN.SM.Up.12H                      |
| AMD1      |       | 1.232 |       |       |       |  |       | 1.035 |       |       |       | EN.SM.Up.12H                      |
| AMPD3     |       | 1.345 |       |       |       |  |       | 1.199 |       |       |       | EN.SM.Up.12H                      |
| ANKRD28   |       | 1.364 |       |       |       |  |       | 1.285 |       |       |       | EN.SM.Up.12H                      |
| AP3M2     |       | 3.965 |       |       |       |  |       | 2.583 |       |       |       | EN.SM.Up.12H                      |
| APG-2     |       | 1.513 |       |       |       |  |       | 1.508 |       |       |       | EN.SM.Up.12H                      |
| ARGG      |       | 2.797 |       |       |       |  |       | 1.888 |       |       |       | EN.SM.Up.12H                      |
| ARSI      |       | 1.455 |       |       |       |  |       | 1.193 |       |       |       | EN.SM.Up.12H                      |
| ATAD2B    |       | 1.305 |       |       |       |  |       | 1.152 |       |       |       | EN.SM.Up.12H                      |
| ATPV0A1   |       | 1.261 |       |       |       |  |       | 1.022 |       |       |       | EN.SM.Up.12H                      |
| ATPV0B    |       | 1.32  |       |       |       |  |       | 1.003 |       |       |       | EN.SM.Up.12H                      |
| BACH1     |       | 1.499 |       |       |       |  |       | 1.47  |       |       |       | EN.SM.Up.12H                      |
| BAIAP2L1  |       | 1.51  |       |       |       |  |       | 1.262 |       |       |       | EN.SM.Up.12H                      |
| BANF      |       | 1.153 |       |       |       |  |       | 1.515 |       |       |       | EN.SM.Up.12H                      |
| BNIP1     |       | 1.542 |       |       |       |  |       | 1.062 |       |       |       | EN.SM.Up.12H                      |
| BYSL      |       | 1.639 |       |       |       |  |       | 1.037 |       |       |       | EN.SM.Up.12H                      |
| CA4       |       | 2.603 |       |       |       |  |       | 2.876 |       |       |       | EN.SM.Up.12H                      |
| CAMTA1    |       | 1.527 |       |       |       |  |       | 1.919 |       |       |       | EN.SM.Up.12H                      |
| CCRL2     |       | 2.35  |       |       |       |  |       | 3.004 |       |       |       | EN.SM.Up.12H                      |
| CCT2      |       | 1.059 |       |       |       |  |       | 1.277 |       |       |       | EN.SM.Up.12H                      |
| CDC42SE1  |       | 1.703 |       |       |       |  |       | 1.548 |       |       |       | EN.SM.Up.12H                      |
| CHORDC1   |       | 1.589 |       |       |       |  |       | 1.222 |       |       |       | EN.SM.Up.12H                      |
| CIRH1A    |       | 1.021 |       |       |       |  |       | 2.066 |       |       |       | EN.SM.Up.12H                      |
| CR1       |       | 1.062 |       |       |       |  |       | 1.562 |       |       |       | EN.SM.Up.12H                      |
| CSNK1G1   |       | 2.594 |       |       |       |  |       | 1.619 |       |       |       | EN.SM.Up.12H                      |
| DCAF12L2  |       | 1.287 |       |       |       |  |       | 1.541 |       |       |       | EN.SM.Up.12H                      |
| DDX18     |       | 1.331 |       |       |       |  |       | 1.368 |       |       |       | EN.SM.Up.12H                      |
| DDX39     |       | 1.194 |       |       |       |  |       | 1.326 |       |       |       | EN.SM.Up.12H                      |
| DNAJC25   |       | 1.067 |       |       |       |  |       | 1.373 |       |       |       | EN.SM.Up.12H                      |

|           |       |  |  |       |  |              |
|-----------|-------|--|--|-------|--|--------------|
| DNAJC7    | 1.138 |  |  | 1.38  |  | EN.SM.Up.12H |
| DPAGT1    | 1.196 |  |  | 1.587 |  | EN.SM.Up.12H |
| EIF2S2    | 1.008 |  |  | 1.174 |  | EN.SM.Up.12H |
| EIF5B     | 1.478 |  |  | 1.19  |  | EN.SM.Up.12H |
| EIF6      | 1.15  |  |  | 1.765 |  | EN.SM.Up.12H |
| ELAC2     | 1.057 |  |  | 1.321 |  | EN.SM.Up.12H |
| ELOVL1    | 2.027 |  |  | 1.175 |  | EN.SM.Up.12H |
| ERC1      | 1.071 |  |  | 1.193 |  | EN.SM.Up.12H |
| EXOSC3    | 1.071 |  |  | 1.065 |  | EN.SM.Up.12H |
| FAR1      | 1.109 |  |  | 1.169 |  | EN.SM.Up.12H |
| FBL       | 1.517 |  |  | 2.264 |  | EN.SM.Up.12H |
| FES       | 1.513 |  |  | 1.339 |  | EN.SM.Up.12H |
| FKBP4     | 1.296 |  |  | 1.038 |  | EN.SM.Up.12H |
| FMNL2     | 1.004 |  |  | 1.198 |  | EN.SM.Up.12H |
| G3BP1     | 1.452 |  |  | 1.523 |  | EN.SM.Up.12H |
| GALNT3    | 3.465 |  |  | 3.547 |  | EN.SM.Up.12H |
| GEMIN6    | 1.296 |  |  | 1.509 |  | EN.SM.Up.12H |
| GLRX      | 1.133 |  |  | 1.041 |  | EN.SM.Up.12H |
| GOSR2     | 1.165 |  |  | 1.466 |  | EN.SM.Up.12H |
| HEATR3    | 1.219 |  |  | 1.032 |  | EN.SM.Up.12H |
| HMOX2     | 1.205 |  |  | 1.377 |  | EN.SM.Up.12H |
| HNRNPAB   | 1.075 |  |  | 1.217 |  | EN.SM.Up.12H |
| HP        | 3.252 |  |  | 4.121 |  | EN.SM.Up.12H |
| HSPA8     | 1.885 |  |  | 2.495 |  | EN.SM.Up.12H |
| IER2      | 1.398 |  |  | 1.973 |  | EN.SM.Up.12H |
| IFITM2    | 3.275 |  |  | 3.401 |  | EN.SM.Up.12H |
| IFRD2     | 1.109 |  |  | 1.103 |  | EN.SM.Up.12H |
| IL13RA    | 1.95  |  |  | 2.51  |  | EN.SM.Up.12H |
| IL1RL2    | 2.836 |  |  | 3.2   |  | EN.SM.Up.12H |
| IPO4      | 1.63  |  |  | 2.138 |  | EN.SM.Up.12H |
| IPO5      | 1.04  |  |  | 1.039 |  | EN.SM.Up.12H |
| ISG20     | 1.932 |  |  | 1.954 |  | EN.SM.Up.12H |
| IVNS1ABP  | 1.077 |  |  | 1.317 |  | EN.SM.Up.12H |
| KCNJ2     | 3.637 |  |  | 3.273 |  | EN.SM.Up.12H |
| LIF       | 1.127 |  |  | 2.599 |  | EN.SM.Up.12H |
| LOC474739 | 1.487 |  |  | 1.418 |  | EN.SM.Up.12H |
| LOC474982 | 1.311 |  |  | 1.219 |  | EN.SM.Up.12H |
| LOC475487 | 1.101 |  |  | 1.198 |  | EN.SM.Up.12H |
| LOC475935 | 4.503 |  |  | 5.575 |  | EN.SM.Up.12H |
| LOC476337 | 1.036 |  |  | 1.068 |  | EN.SM.Up.12H |
| LOC477835 | 1.124 |  |  | 1.084 |  | EN.SM.Up.12H |
| LOC478015 | 1.235 |  |  | 1.127 |  | EN.SM.Up.12H |
| LOC478234 | 1.283 |  |  | 1.058 |  | EN.SM.Up.12H |
| LOC479798 | 1.388 |  |  | 1.533 |  | EN.SM.Up.12H |
| LOC480097 | 1.707 |  |  | 1.283 |  | EN.SM.Up.12H |
| LOC480714 | 1.473 |  |  | 2.087 |  | EN.SM.Up.12H |
| LOC482733 | 1.054 |  |  | 1.397 |  | EN.SM.Up.12H |
| LOC484482 | 1.254 |  |  | 1.175 |  | EN.SM.Up.12H |
| LOC485196 | 1.937 |  |  | 1.591 |  | EN.SM.Up.12H |
| LOC486535 | 1.127 |  |  | 1.212 |  | EN.SM.Up.12H |
| LOC487497 | 1.172 |  |  | 1.247 |  | EN.SM.Up.12H |
| LOC607454 | 1.198 |  |  | 1.01  |  | EN.SM.Up.12H |
| LOC607910 | 1.267 |  |  | 1.353 |  | EN.SM.Up.12H |
| LOC608717 | 1.059 |  |  | 1.17  |  | EN.SM.Up.12H |
| LOC609631 | 1.371 |  |  | 1.602 |  | EN.SM.Up.12H |
| LOC611809 | 2.762 |  |  | 3.17  |  | EN.SM.Up.12H |
| LOC611892 | 1.67  |  |  | 1.795 |  | EN.SM.Up.12H |
| LOC612872 | 1.919 |  |  | 2.029 |  | EN.SM.Up.12H |
| LRRC63    | 1.068 |  |  | 1.508 |  | EN.SM.Up.12H |
| LSG1      | 1.033 |  |  | 1.081 |  | EN.SM.Up.12H |
| LTF       | 1.027 |  |  | 3.936 |  | EN.SM.Up.12H |
| LTV1      | 1.171 |  |  | 1.341 |  | EN.SM.Up.12H |
| MAGOH     | 1.078 |  |  | 1.51  |  | EN.SM.Up.12H |
| MAPKAPK2  | 1.404 |  |  | 1.394 |  | EN.SM.Up.12H |
| MEGF9     | 1.967 |  |  | 1.294 |  | EN.SM.Up.12H |
| METTL1    | 1.554 |  |  | 3.351 |  | EN.SM.Up.12H |
| MFS2D     | 1.134 |  |  | 1.61  |  | EN.SM.Up.12H |
| MGAM      | 2.26  |  |  | 2.336 |  | EN.SM.Up.12H |
| MMP1      | 1.749 |  |  | 1.445 |  | EN.SM.Up.12H |
| MMP8      | 4.309 |  |  | 4.835 |  | EN.SM.Up.12H |
| MRPS16    | 1.49  |  |  | 1.219 |  | EN.SM.Up.12H |
| MRTO4     | 1.22  |  |  | 1.236 |  | EN.SM.Up.12H |
| MTO1      | 1.239 |  |  | 1.001 |  | EN.SM.Up.12H |
| MYCN      | 1.352 |  |  | 1.116 |  | EN.SM.Up.12H |
| NAV2      | 1.463 |  |  | 1.07  |  | EN.SM.Up.12H |
| NCF1      | 2.802 |  |  | 2.694 |  | EN.SM.Up.12H |
| NDIP2     | 1.093 |  |  | 1.005 |  | EN.SM.Up.12H |
| NFIL3     | 1.946 |  |  | 2.031 |  | EN.SM.Up.12H |
| NHP2      | 1.022 |  |  | 1.655 |  | EN.SM.Up.12H |
| NOC4L     | 1.8   |  |  | 1.328 |  | EN.SM.Up.12H |
| NOP56     | 1.34  |  |  | 1.423 |  | EN.SM.Up.12H |
| NR2C2ZAP  | 1.214 |  |  | 1.035 |  | EN.SM.Up.12H |
| NXT1      | 1.245 |  |  | 1.221 |  | EN.SM.Up.12H |
| OAF       | 1.074 |  |  | 1.013 |  | EN.SM.Up.12H |
| PAI2      | 1.086 |  |  | 1.096 |  | EN.SM.Up.12H |
| PAK1IP1   | 1.326 |  |  | 1.516 |  | EN.SM.Up.12H |
| PDCD11    | 1.486 |  |  | 1.593 |  | EN.SM.Up.12H |
| PGS1      | 1.698 |  |  | 1.445 |  | EN.SM.Up.12H |
| PITPNC1   | 1.356 |  |  | 1.462 |  | EN.SM.Up.12H |
| PLA2G4A   | 1.29  |  |  | 1.368 |  | EN.SM.Up.12H |
| PLCG2     | 2.415 |  |  | 2.296 |  | EN.SM.Up.12H |
| PLNA2     | 1.51  |  |  | 1.068 |  | EN.SM.Up.12H |
| POLR3E    | 1.139 |  |  | 1.306 |  | EN.SM.Up.12H |
| PRDM1     | 1.474 |  |  | 1.876 |  | EN.SM.Up.12H |
| PRDX6     | 1.161 |  |  | 1.796 |  | EN.SM.Up.12H |
| PRMT1     | 1.058 |  |  | 1.283 |  | EN.SM.Up.12H |
| PRMT3     | 1.082 |  |  | 1.289 |  | EN.SM.Up.12H |
| PRMT5     | 1.208 |  |  | 1.604 |  | EN.SM.Up.12H |
| PSMD9     | 1.177 |  |  | 1     |  | EN.SM.Up.12H |
| PTFR      | 1.444 |  |  | 1.302 |  | EN.SM.Up.12H |
| PTK2      | 2.409 |  |  | 1.055 |  | EN.SM.Up.12H |
| PTPN1     | 1.739 |  |  | 1.614 |  | EN.SM.Up.12H |
| PTPRK     | 1.991 |  |  | 1.532 |  | EN.SM.Up.12H |
| PWP1      | 1.072 |  |  | 1.197 |  | EN.SM.Up.12H |
| QPCT      | 1.573 |  |  | 1.55  |  | EN.SM.Up.12H |
| RAB24     | 1.871 |  |  | 1.384 |  | EN.SM.Up.12H |
| RASSF1    | 1.379 |  |  | 1.561 |  | EN.SM.Up.12H |
| RBM51     | 1.154 |  |  | 1.207 |  | EN.SM.Up.12H |
| RILPL2    | 1.682 |  |  | 1.467 |  | EN.SM.Up.12H |
| RRP12     | 1.342 |  |  | 1.554 |  | EN.SM.Up.12H |
| RRP1B     | 1.467 |  |  | 1.627 |  | EN.SM.Up.12H |
| SEC23B    | 1.199 |  |  | 2.039 |  | EN.SM.Up.12H |
| SERHL2    | 1.353 |  |  | 1.15  |  | EN.SM.Up.12H |
| SETD8     | 1.06  |  |  | 1.137 |  | EN.SM.Up.12H |
| SIRPG     | 1.291 |  |  | 1.361 |  | EN.SM.Up.12H |
| SLAMF7    | 1.141 |  |  | 1.46  |  | EN.SM.Up.12H |
| SLC17A2   | 1.51  |  |  | 1.29  |  | EN.SM.Up.12H |
| SLC28A3   | 2.138 |  |  | 1.979 |  | EN.SM.Up.12H |
| SLC30A9   | 1.189 |  |  | 1.023 |  | EN.SM.Up.12H |
| SLC35B1   | 1.022 |  |  | 1.211 |  | EN.SM.Up.12H |
| SLC9A11   | 2.214 |  |  | 2.58  |  | EN.SM.Up.12H |
| SLC06A1   | 1.591 |  |  | 1.305 |  | EN.SM.Up.12H |
| SMAP2     | 1.391 |  |  | 1.031 |  | EN.SM.Up.12H |

|           |       |       |       |  |       |       |       |  |              |
|-----------|-------|-------|-------|--|-------|-------|-------|--|--------------|
| SNRPA1    |       | 1.156 |       |  |       | 1.543 |       |  | EN.SM.Up.12H |
| SNRPF     |       | 1.467 |       |  |       | 1.544 |       |  | EN.SM.Up.12H |
| SPI1      |       | 1.71  |       |  |       | 1.095 |       |  | EN.SM.Up.12H |
| SPTFZD1   |       | 1.283 |       |  |       | 1.016 |       |  | EN.SM.Up.12H |
| STCAP4    |       | 3.353 |       |  |       | 1.524 |       |  | EN.SM.Up.12H |
| STIP1     |       | 1.295 |       |  |       | 1.050 |       |  | EN.SM.Up.12H |
| STK35     |       | 1.379 |       |  |       | 1.075 |       |  | EN.SM.Up.12H |
| STK4      |       | 1.324 |       |  |       | 1.456 |       |  | EN.SM.Up.12H |
| TAF9      |       | 1.001 |       |  |       | 1.195 |       |  | EN.SM.Up.12H |
| TAGLN3    |       | 1.651 |       |  |       | 1.456 |       |  | EN.SM.Up.12H |
| THB0      |       | 1.301 |       |  |       | 1.941 |       |  | EN.SM.Up.12H |
| TM9554    |       | 1.349 |       |  |       | 1.181 |       |  | EN.SM.Up.12H |
| TMEM201   |       | 2.057 |       |  |       | 2.221 |       |  | EN.SM.Up.12H |
| TNK2      |       | 1.247 |       |  |       | 1.132 |       |  | EN.SM.Up.12H |
| TPD52     |       | 1.561 |       |  |       | 1.991 |       |  | EN.SM.Up.12H |
| TREML2    |       | 1.992 |       |  |       | 1.729 |       |  | EN.SM.Up.12H |
| TTC27     |       | 1.561 |       |  |       | 2.179 |       |  | EN.SM.Up.12H |
| UBE25     |       | 1.603 |       |  |       | 1.231 |       |  | EN.SM.Up.12H |
| UXT       |       | 1.012 |       |  |       | 1.228 |       |  | EN.SM.Up.12H |
| WDR46     |       | 1.759 |       |  |       | 1.65  |       |  | EN.SM.Up.12H |
| WDR75     |       | 1.019 |       |  |       | 1.45  |       |  | EN.SM.Up.12H |
| XDH       |       | 1.119 |       |  |       | 1.5   |       |  | EN.SM.Up.12H |
| YRDC      |       | 1.288 |       |  |       | 1.786 |       |  | EN.SM.Up.12H |
| ZDHC7     |       | 1.168 |       |  |       | 1.139 |       |  | EN.SM.Up.12H |
| ZNF259    |       | 1.214 |       |  |       | 1.507 |       |  | EN.SM.Up.12H |
| ZNF276    |       | 1.605 |       |  |       | 1.463 |       |  | EN.SM.Up.12H |
| OTUD1     | 2.592 |       |       |  | 2.409 |       |       |  | EN.SM.Up.2H  |
| ACTR2     |       |       | 1.14  |  |       |       | 1.233 |  | EN.SM.Up.7D  |
| ADA       |       |       | 1.501 |  |       |       | 1.931 |  | EN.SM.Up.7D  |
| ADAM28    |       |       | 2.255 |  |       |       | 1.692 |  | EN.SM.Up.7D  |
| ADAMTS3   |       |       | 1.614 |  |       |       | 1.521 |  | EN.SM.Up.7D  |
| ADPGK     |       |       | 1.039 |  |       |       | 1.14  |  | EN.SM.Up.7D  |
| ALCAM     |       |       | 1.155 |  |       |       | 1.022 |  | EN.SM.Up.7D  |
| ALDH1L2   |       |       | 1.15  |  |       |       | 1.9   |  | EN.SM.Up.7D  |
| ANLN      |       |       | 4.227 |  |       |       | 4.278 |  | EN.SM.Up.7D  |
| ANK1      |       |       | 1.506 |  |       |       | 1.188 |  | EN.SM.Up.7D  |
| API52     |       |       | 1.004 |  |       |       | 1.204 |  | EN.SM.Up.7D  |
| ARHGAP11A |       |       | 1.79  |  |       |       | 1.783 |  | EN.SM.Up.7D  |
| ARPC4     |       |       | 1.091 |  |       |       | 1.454 |  | EN.SM.Up.7D  |
| ASPM      |       |       | 3.105 |  |       |       | 4.328 |  | EN.SM.Up.7D  |
| ATAD2     |       |       | 2.355 |  |       |       | 2.384 |  | EN.SM.Up.7D  |
| ATMIN     |       |       | 1.421 |  |       |       | 1.014 |  | EN.SM.Up.7D  |
| AURKA     |       |       | 1.954 |  |       |       | 2.16  |  | EN.SM.Up.7D  |
| BIRC5     |       |       | 2.119 |  |       |       | 2.247 |  | EN.SM.Up.7D  |
| BNX2      |       |       | 1.405 |  |       |       | 1.263 |  | EN.SM.Up.7D  |
| BUB1B     |       |       | 2.889 |  |       |       | 3.051 |  | EN.SM.Up.7D  |
| C3AR1     |       |       | 3.947 |  |       |       | 3.154 |  | EN.SM.Up.7D  |
| CASC5     |       |       | 2.319 |  |       |       | 2.636 |  | EN.SM.Up.7D  |
| CASP6     |       |       | 1.048 |  |       |       | 1.162 |  | EN.SM.Up.7D  |
| CCNA2     |       |       | 3.865 |  |       |       | 3.548 |  | EN.SM.Up.7D  |
| CCNB2     |       |       | 1.773 |  |       |       | 1.699 |  | EN.SM.Up.7D  |
| CCNE2     |       |       | 1.244 |  |       |       | 1.272 |  | EN.SM.Up.7D  |
| CDC2      |       |       | 2.852 |  |       |       | 3.193 |  | EN.SM.Up.7D  |
| CDC20     |       |       | 1.514 |  |       |       | 1.355 |  | EN.SM.Up.7D  |
| CDC42     |       |       | 1.946 |  |       |       | 1.809 |  | EN.SM.Up.7D  |
| CDC43     |       |       | 2.327 |  |       |       | 2.142 |  | EN.SM.Up.7D  |
| CDKN3     |       |       | 1.103 |  |       |       | 1.344 |  | EN.SM.Up.7D  |
| CENPF     |       |       | 5.957 |  |       |       | 5.914 |  | EN.SM.Up.7D  |
| CENPO     |       |       | 1.206 |  |       |       | 2.181 |  | EN.SM.Up.7D  |
| CENPF     |       |       | 1.248 |  |       |       | 1.121 |  | EN.SM.Up.7D  |
| CEP170    |       |       | 1.016 |  |       |       | 1.082 |  | EN.SM.Up.7D  |
| CHST10    |       |       | 1.103 |  |       |       | 1.392 |  | EN.SM.Up.7D  |
| CHSY3     |       |       | 2.094 |  |       |       | 2.512 |  | EN.SM.Up.7D  |
| CIB1      |       |       | 1.006 |  |       |       | 1.351 |  | EN.SM.Up.7D  |
| CKAP2L    |       |       | 2.4   |  |       |       | 2.283 |  | EN.SM.Up.7D  |
| COL15A1   |       |       | 1.395 |  |       |       | 1.84  |  | EN.SM.Up.7D  |
| COL4A2    |       |       | 1.437 |  |       |       | 1.125 |  | EN.SM.Up.7D  |
| COMP      |       |       | 1.722 |  |       |       | 3.43  |  | EN.SM.Up.7D  |
| CRABP2    |       |       | 2.315 |  |       |       | 2.395 |  | EN.SM.Up.7D  |
| CTSA      |       |       | 1.974 |  |       |       | 1.292 |  | EN.SM.Up.7D  |
| DAB2      |       |       | 1.138 |  |       |       | 1.13  |  | EN.SM.Up.7D  |
| DCK       |       |       | 2.459 |  |       |       | 2.507 |  | EN.SM.Up.7D  |
| DEPDC1    |       |       | 4.376 |  |       |       | 5.048 |  | EN.SM.Up.7D  |
| DEPDC1B   |       |       | 1.665 |  |       |       | 1.741 |  | EN.SM.Up.7D  |
| DIAPH3    |       |       | 4.227 |  |       |       | 3.743 |  | EN.SM.Up.7D  |
| DIGAP5    |       |       | 3.498 |  |       |       | 4.043 |  | EN.SM.Up.7D  |
| DNA2      |       |       | 2.461 |  |       |       | 2.561 |  | EN.SM.Up.7D  |
| DNAIC1    |       |       | 1.09  |  |       |       | 1.52  |  | EN.SM.Up.7D  |
| DPYSL3    |       |       | 1.265 |  |       |       | 1.565 |  | EN.SM.Up.7D  |
| DPYSL5    |       |       | 1.782 |  |       |       | 1.808 |  | EN.SM.Up.7D  |
| DSE       |       |       | 1.131 |  |       |       | 1.253 |  | EN.SM.Up.7D  |
| E2F8      |       |       | 1.717 |  |       |       | 1.654 |  | EN.SM.Up.7D  |
| ECT2      |       |       | 2.713 |  |       |       | 3.966 |  | EN.SM.Up.7D  |
| ERC6L     |       |       | 1.794 |  |       |       | 2.876 |  | EN.SM.Up.7D  |
| ERP29     |       |       | 1.322 |  |       |       | 1.15  |  | EN.SM.Up.7D  |
| ESCO2     |       |       | 2.676 |  |       |       | 2.824 |  | EN.SM.Up.7D  |
| EXO1      |       |       | 1.534 |  |       |       | 1.441 |  | EN.SM.Up.7D  |
| FANCM     |       |       | 1.896 |  |       |       | 2.414 |  | EN.SM.Up.7D  |
| FBN1      |       |       | 1.11  |  |       |       | 1.513 |  | EN.SM.Up.7D  |
| FCGR3A    |       |       | 3.511 |  |       |       | 3.046 |  | EN.SM.Up.7D  |
| FKBP1B    |       |       | 1.118 |  |       |       | 2.175 |  | EN.SM.Up.7D  |
| FRN1      |       |       | 1.164 |  |       |       | 1.08  |  | EN.SM.Up.7D  |
| FOXO1     |       |       | 4.368 |  |       |       | 3.755 |  | EN.SM.Up.7D  |
| FSTL1     |       |       | 1.039 |  |       |       | 1.161 |  | EN.SM.Up.7D  |
| G8A       |       |       | 1.278 |  |       |       | 1.042 |  | EN.SM.Up.7D  |
| GEN1      |       |       | 1.856 |  |       |       | 2.191 |  | EN.SM.Up.7D  |
| GLDN      |       |       | 2.92  |  |       |       | 2.514 |  | EN.SM.Up.7D  |
| GSG2      |       |       | 1.933 |  |       |       | 1.65  |  | EN.SM.Up.7D  |
| HLA-DMA   |       |       | 1.926 |  |       |       | 2.411 |  | EN.SM.Up.7D  |
| HMG83     |       |       | 2.324 |  |       |       | 1.911 |  | EN.SM.Up.7D  |
| HMMR      |       |       | 1.803 |  |       |       | 2.092 |  | EN.SM.Up.7D  |
| HORMAD1   |       |       | 1.275 |  |       |       | 1.399 |  | EN.SM.Up.7D  |
| IL10RB    |       |       | 1.231 |  |       |       | 1.34  |  | EN.SM.Up.7D  |
| INCENP    |       |       | 1.188 |  |       |       | 1.424 |  | EN.SM.Up.7D  |
| ITGAV     |       |       | 1.576 |  |       |       | 1.189 |  | EN.SM.Up.7D  |
| KDELR3    |       |       | 1.11  |  |       |       | 2.066 |  | EN.SM.Up.7D  |
| KIF11     |       |       | 4.367 |  |       |       | 5.162 |  | EN.SM.Up.7D  |
| KIF14     |       |       | 2.423 |  |       |       | 2.719 |  | EN.SM.Up.7D  |
| KIF18A    |       |       | 1.357 |  |       |       | 1.815 |  | EN.SM.Up.7D  |
| KIF23     |       |       | 3.242 |  |       |       | 3.886 |  | EN.SM.Up.7D  |
| KIF27     |       |       | 1.267 |  |       |       | 1.608 |  | EN.SM.Up.7D  |
| KIFC1     |       |       | 1.836 |  |       |       | 1.515 |  | EN.SM.Up.7D  |
| KLRG1     |       |       | 2.557 |  |       |       | 2.09  |  | EN.SM.Up.7D  |
| LOC476944 |       |       | 1.213 |  |       |       | 1.496 |  | EN.SM.Up.7D  |
| LOC477773 |       |       | 2.75  |  |       |       | 3.246 |  | EN.SM.Up.7D  |
| LOC478258 |       |       | 2.454 |  |       |       | 2.454 |  | EN.SM.Up.7D  |
| LOC478335 |       |       | 1.274 |  |       |       | 1.436 |  | EN.SM.Up.7D  |
| LOC478349 |       |       | 1.127 |  |       |       | 1.305 |  | EN.SM.Up.7D  |
| LOC478384 |       |       | 2.432 |  |       |       | 1.585 |  | EN.SM.Up.7D  |
| LOC478498 |       |       | 1.782 |  |       |       | 1.862 |  | EN.SM.Up.7D  |
| LOC478559 |       |       | 1.728 |  |       |       | 1.486 |  | EN.SM.Up.7D  |
| LOC479820 |       |       | 1.797 |  |       |       | 1.02  |  | EN.SM.Up.7D  |
| LOC480027 |       |       | 3.837 |  |       |       | 4.084 |  | EN.SM.Up.7D  |

|           |       |       |       |       |  |       |       |       |                                                |
|-----------|-------|-------|-------|-------|--|-------|-------|-------|------------------------------------------------|
| LOC480926 |       |       |       | 1.224 |  |       |       | 1.916 | EN.SM.Up.7D                                    |
| LOC483842 |       |       |       | 1.353 |  |       |       | 2.68  | EN.SM.Up.7D                                    |
| LOC485338 |       |       |       | 3.523 |  |       |       | 4.082 | EN.SM.Up.7D                                    |
| LOC490554 |       |       |       | 1.505 |  |       |       | 1.451 | EN.SM.Up.7D                                    |
| LOC607711 |       |       |       | 1.578 |  |       |       | 1.726 | EN.SM.Up.7D                                    |
| LOC608673 |       |       |       | 1.473 |  |       |       | 2.206 | EN.SM.Up.7D                                    |
| LOC609701 |       |       |       | 1.659 |  |       |       | 1.987 | EN.SM.Up.7D                                    |
| LOC609897 |       |       |       | 2.067 |  |       |       | 1.622 | EN.SM.Up.7D                                    |
| LOC610244 |       |       |       | 1.476 |  |       |       | 1.636 | EN.SM.Up.7D                                    |
| LOC612196 |       |       |       | 3.173 |  |       |       | 3.224 | EN.SM.Up.7D                                    |
| LOC612298 |       |       |       | 3.195 |  |       |       | 3.237 | EN.SM.Up.7D                                    |
| MAD2L1    |       |       |       | 2.12  |  |       |       | 1.964 | EN.SM.Up.7D                                    |
| MAN1A1    |       |       |       | 1.639 |  |       |       | 1.543 | EN.SM.Up.7D                                    |
| MAN2A1    |       |       |       | 1.3   |  |       |       | 1.744 | EN.SM.Up.7D                                    |
| MATN3     |       |       |       | 3.311 |  |       |       | 4.091 | EN.SM.Up.7D                                    |
| MEST      |       |       |       | 1.375 |  |       |       | 1.515 | EN.SM.Up.7D                                    |
| MFS11     |       |       |       | 1.678 |  |       |       | 1.188 | EN.SM.Up.7D                                    |
| MIS12     |       |       |       | 1.667 |  |       |       | 1.338 | EN.SM.Up.7D                                    |
| MMD       |       |       |       | 1.608 |  |       |       | 1.119 | EN.SM.Up.7D                                    |
| MSN       |       |       |       | 1.015 |  |       |       | 1.181 | EN.SM.Up.7D                                    |
| MSR1      |       |       |       | 4.458 |  |       |       | 3.638 | EN.SM.Up.7D                                    |
| NCAPD2    |       |       |       | 1.078 |  |       |       | 1.215 | EN.SM.Up.7D                                    |
| NCAPD3    |       |       |       | 1.098 |  |       |       | 1.54  | EN.SM.Up.7D                                    |
| NCAPG     |       |       |       | 1.933 |  |       |       | 1.421 | EN.SM.Up.7D                                    |
| NCAPH     |       |       |       | 2.052 |  |       |       | 2.693 | EN.SM.Up.7D                                    |
| NEGR1     |       |       |       | 2.602 |  |       |       | 1.117 | EN.SM.Up.7D                                    |
| NEK2      |       |       |       | 1.194 |  |       |       | 1.412 | EN.SM.Up.7D                                    |
| NNT       |       |       |       | 1.006 |  |       |       | 1.551 | EN.SM.Up.7D                                    |
| NPC2      |       |       |       | 1.452 |  |       |       | 1.388 | EN.SM.Up.7D                                    |
| NLF2      |       |       |       | 3.155 |  |       |       | 3.497 | EN.SM.Up.7D                                    |
| OAS2      |       |       |       | 2.07  |  |       |       | 2.934 | EN.SM.Up.7D                                    |
| P2RX4     |       |       |       | 1.225 |  |       |       | 1.544 | EN.SM.Up.7D                                    |
| PHTF1     |       |       |       | 1.528 |  |       |       | 1.39  | EN.SM.Up.7D                                    |
| PLK1      |       |       |       | 3.002 |  |       |       | 2.368 | EN.SM.Up.7D                                    |
| PLK4      |       |       |       | 1.156 |  |       |       | 1.385 | EN.SM.Up.7D                                    |
| PLD1      |       |       |       | 1.419 |  |       |       | 1.58  | EN.SM.Up.7D                                    |
| PLD2      |       |       |       | 1.233 |  |       |       | 1.231 | EN.SM.Up.7D                                    |
| PMCH      |       |       |       | 1.922 |  |       |       | 1.31  | EN.SM.Up.7D                                    |
| POLA2     |       |       |       | 1.297 |  |       |       | 1.384 | EN.SM.Up.7D                                    |
| PPIC      |       |       |       | 1.012 |  |       |       | 1.668 | EN.SM.Up.7D                                    |
| PPP1CA    |       |       |       | 1.432 |  |       |       | 1.048 | EN.SM.Up.7D                                    |
| PRC1      |       |       |       | 3.672 |  |       |       | 3.335 | EN.SM.Up.7D                                    |
| PRKX      |       |       |       | 1.584 |  |       |       | 1.703 | EN.SM.Up.7D                                    |
| PSK3IP    |       |       |       | 1.167 |  |       |       | 1.149 | EN.SM.Up.7D                                    |
| PTTG1     |       |       |       | 4.135 |  |       |       | 4.634 | EN.SM.Up.7D                                    |
| RACGAP1   |       |       |       | 3.903 |  |       |       | 3.827 | EN.SM.Up.7D                                    |
| RCC2      |       |       |       | 1.369 |  |       |       | 1.28  | EN.SM.Up.7D                                    |
| REEP4     |       |       |       | 2.466 |  |       |       | 2.253 | EN.SM.Up.7D                                    |
| RFC3      |       |       |       | 1.253 |  |       |       | 1.189 | EN.SM.Up.7D                                    |
| RFC4      |       |       |       | 1.161 |  |       |       | 1.292 | EN.SM.Up.7D                                    |
| RRM1      |       |       |       | 1.09  |  |       |       | 1.357 | EN.SM.Up.7D                                    |
| SAS56     |       |       |       | 2.026 |  |       |       | 2.246 | EN.SM.Up.7D                                    |
| SCG3      |       |       |       | 2.452 |  |       |       | 2.563 | EN.SM.Up.7D                                    |
| SEC23A    |       |       |       | 1.313 |  |       |       | 1.029 | EN.SM.Up.7D                                    |
| SERPINH1  |       |       |       | 1.572 |  |       |       | 1.378 | EN.SM.Up.7D                                    |
| SGOL2     |       |       |       | 1.061 |  |       |       | 1.179 | EN.SM.Up.7D                                    |
| SGPL1     |       |       |       | 1.306 |  |       |       | 2.295 | EN.SM.Up.7D                                    |
| SH3KBP1   |       |       |       | 1.308 |  |       |       | 1.705 | EN.SM.Up.7D                                    |
| SHCBP1    |       |       |       | 3.235 |  |       |       | 3.34  | EN.SM.Up.7D                                    |
| SLOC646   |       |       |       | 1.613 |  |       |       | 1.751 | EN.SM.Up.7D                                    |
| SMA4      |       |       |       | 1.198 |  |       |       | 1.549 | EN.SM.Up.7D                                    |
| SNAI2     |       |       |       | 1.349 |  |       |       | 1.916 | EN.SM.Up.7D                                    |
| SPAG5     |       |       |       | 2.899 |  |       |       | 3.149 | EN.SM.Up.7D                                    |
| STAT1     |       |       |       | 1.09  |  |       |       | 1.227 | EN.SM.Up.7D                                    |
| STC2      |       |       |       | 1.277 |  |       |       | 2.144 | EN.SM.Up.7D                                    |
| TANC2     |       |       |       | 1.405 |  |       |       | 1.505 | EN.SM.Up.7D                                    |
| TF        |       |       |       | 3.158 |  |       |       | 2.278 | EN.SM.Up.7D                                    |
| TPS3INP1  |       |       |       | 2.003 |  |       |       | 1.724 | EN.SM.Up.7D                                    |
| TRAPPC1   |       |       |       | 1.287 |  |       |       | 1.264 | EN.SM.Up.7D                                    |
| TRIM36    |       |       |       | 2.976 |  |       |       | 2.831 | EN.SM.Up.7D                                    |
| TTK       |       |       |       | 1.184 |  |       |       | 1.733 | EN.SM.Up.7D                                    |
| UGGT2     |       |       |       | 1.238 |  |       |       | 1.633 | EN.SM.Up.7D                                    |
| UNC119    |       |       |       | 1.891 |  |       |       | 1.334 | EN.SM.Up.7D                                    |
| XPNPEP1   |       |       |       | 1.047 |  |       |       | 1.265 | EN.SM.Up.7D                                    |
| ZFH4      |       |       |       | 1.41  |  |       |       | 1.276 | EN.SM.Up.7D                                    |
| CFB       |       |       |       |       |  | 1.575 |       | 1.657 | SM.Only.Down.12H, SM.Only.Up.12H.7D            |
| LGALS3    |       |       | 2.311 |       |  |       |       | 1.515 | SM.Only.Down.7D, SM.Only.Up.7D, EN.Only.Up.24H |
| PLP2      |       |       | 1.121 |       |  |       |       | 1.078 | SM.Only.Down.7D, SM.Only.Up.7D, EN.Only.Up.24H |
| ADSS      | 1.399 |       |       |       |  |       | 1.142 |       | SM.Only.Up.12H                                 |
| CCNJ      |       | 1.299 |       |       |  |       | 1.044 |       | SM.Only.Up.12H                                 |
| DCAF12    |       | 1.287 |       |       |  |       | 1.169 |       | SM.Only.Up.12H                                 |
| IL15      |       | 1.95  |       |       |  |       | 1.029 |       | SM.Only.Up.12H                                 |
| SLC7A1    |       |       | 2.044 |       |  |       | 1.102 |       | SM.Only.Up.12H                                 |
| VIP       |       | 1.185 |       |       |  |       | 2.122 |       | SM.Only.Up.12H                                 |
| ADRBK1    |       |       | 1.527 |       |  |       | 1.713 |       | SM.Only.Up.12H, EN.Only.Up.24H                 |
| AMBP      |       |       | 1.397 |       |  |       | 1.575 |       | SM.Only.Up.12H, EN.Only.Up.24H                 |
| CLP1      |       |       | 1.044 |       |  |       | 1.168 |       | SM.Only.Up.12H, EN.Only.Up.24H                 |
| COQ10B    |       |       | 1.653 |       |  |       | 1.114 |       | SM.Only.Up.12H, EN.Only.Up.24H                 |
| CXCL10    |       |       | 1.397 |       |  |       | 1.291 |       | SM.Only.Up.12H, EN.Only.Up.24H                 |
| ECE2      |       |       | 1.198 |       |  |       | 1.748 |       | SM.Only.Up.12H, EN.Only.Up.24H                 |
| EPB41     |       |       | 1.147 |       |  |       | 1.043 |       | SM.Only.Up.12H, EN.Only.Up.24H                 |
| FGD4      |       |       | 1.298 |       |  |       | 1.16  |       | SM.Only.Up.12H, EN.Only.Up.24H                 |
| GPR171    |       |       | 1.278 |       |  |       | 1.657 |       | SM.Only.Up.12H, EN.Only.Up.24H                 |
| HHEX      |       |       | 1.568 |       |  |       | 3.35  |       | SM.Only.Up.12H, EN.Only.Up.24H                 |
| LOC475958 |       |       | 1.531 |       |  |       | 1.363 |       | SM.Only.Up.12H, EN.Only.Up.24H                 |
| LOC477662 |       |       | 1.447 |       |  |       | 1.54  |       | SM.Only.Up.12H, EN.Only.Up.24H                 |
| LOC611656 |       |       | 1.106 |       |  |       | 1.074 |       | SM.Only.Up.12H, EN.Only.Up.24H                 |
| NMT1      |       |       | 1.379 |       |  |       | 1.058 |       | SM.Only.Up.12H, EN.Only.Up.24H                 |
| ODF2L     |       |       | 1.725 |       |  |       | 1.477 |       | SM.Only.Up.12H, EN.Only.Up.24H                 |
| PGD       |       |       | 1.051 |       |  |       | 1.313 |       | SM.Only.Up.12H, EN.Only.Up.24H                 |
| PIGX      |       |       | 1.9   |       |  |       | 1.184 |       | SM.Only.Up.12H, EN.Only.Up.24H                 |
| PIK3CD    |       |       | 2.08  |       |  |       | 1.507 |       | SM.Only.Up.12H, EN.Only.Up.24H                 |
| PIM1      |       |       | 2.194 |       |  |       | 2.228 |       | SM.Only.Up.12H, EN.Only.Up.24H                 |
| PSMA6     |       |       | 1.189 |       |  |       | 1.08  |       | SM.Only.Up.12H, EN.Only.Up.24H                 |
| RG52      |       |       | 1.29  |       |  |       | 1.067 |       | SM.Only.Up.12H, EN.Only.Up.24H                 |
| SLC25A38  |       |       | 2.726 |       |  |       | 1.104 |       | SM.Only.Up.12H, EN.Only.Up.24H                 |
| SOAT1     |       |       | 1.898 |       |  |       | 1.268 |       | SM.Only.Up.12H, EN.Only.Up.24H                 |
| SPINT1    |       |       | 2.832 |       |  |       | 2.473 |       | SM.Only.Up.12H, EN.Only.Up.24H                 |
| STRAP     |       |       | 1.162 |       |  |       | 1.559 |       | SM.Only.Up.12H, EN.Only.Up.24H                 |
| TDG       |       |       | 1.447 |       |  |       | 1.217 |       | SM.Only.Up.12H, EN.Only.Up.24H                 |
| TMEM138   |       |       | 1.469 |       |  |       | 1.749 |       | SM.Only.Up.12H, EN.Only.Up.24H                 |
| TPMT      |       |       | 2.261 |       |  |       | 1.443 |       | SM.Only.Up.12H, EN.Only.Up.24H                 |
| TRMT61B   |       |       | 1.404 |       |  |       | 1.176 |       | SM.Only.Up.12H, EN.Only.Up.24H                 |
| ARL5B     | 2.834 |       |       |       |  |       | 1.266 |       | SM.Only.Up.12H, EN.Only.Up.2H                  |
| BTG2      |       | 2.96  |       |       |  |       | 1.084 |       | SM.Only.Up.12H, EN.Only.Up.2H                  |
| EYAA      |       | 2.678 |       |       |  |       | 1.607 |       | SM.Only.Up.12H, EN.Only.Up.2H                  |
| FGF19     |       | 2.744 |       |       |  |       | 3.316 |       | SM.Only.Up.12H, EN.Only.Up.2H                  |
| GFPT2     |       | 4.866 |       |       |  |       | 2.372 |       | SM.Only.Up.12H, EN.Only.Up.2H                  |
| GFZF2B    |       | 2.367 |       |       |  |       | 1.401 |       | SM.Only.Up.12H, EN.Only.Up.2H                  |
| IRAK2     |       | 2.614 |       |       |  |       | 1.562 |       | SM.Only.Up.12H, EN.Only.Up.2H                  |
| KDM6B     |       | 1.563 |       |       |  |       | 1.346 |       | SM.Only.Up.12H, EN.Only.Up.2H                  |
| KIN       |       | 1.92  |       |       |  |       | 2.203 |       | SM.Only.Up.12H, EN.Only.Up.2H                  |
| LANCL2    |       | 1.348 |       |       |  |       | 1.166 |       | SM.Only.Up.12H, EN.Only.Up.2H                  |

|           |       |       |       |  |  |       |       |       |                                |
|-----------|-------|-------|-------|--|--|-------|-------|-------|--------------------------------|
| LOC481657 | 1.618 |       |       |  |  | 1.239 |       |       | SM.Only.Up.12H, EN.Only.Up.2H  |
| NDEL1     | 1.669 |       |       |  |  | 1.168 |       |       | SM.Only.Up.12H, EN.Only.Up.2H  |
| NFATC2    | 2.77  |       |       |  |  | 1.901 |       |       | SM.Only.Up.12H, EN.Only.Up.2H  |
| PEL1      | 1.424 |       |       |  |  | 1.263 |       |       | SM.Only.Up.12H, EN.Only.Up.2H  |
| PFKFB2    | 3.259 |       |       |  |  | 1.691 |       |       | SM.Only.Up.12H, EN.Only.Up.2H  |
| PLAU      | 1.528 |       |       |  |  | 1.294 |       |       | SM.Only.Up.12H, EN.Only.Up.2H  |
| PTP4A1    | 1.637 |       |       |  |  | 1.202 |       |       | SM.Only.Up.12H, EN.Only.Up.2H  |
| RNF138    | 1.662 |       |       |  |  | 1.483 |       |       | SM.Only.Up.12H, EN.Only.Up.2H  |
| RNF19B    | 2.815 |       |       |  |  | 1.694 |       |       | SM.Only.Up.12H, EN.Only.Up.2H  |
| SEC24A    | 2.06  |       |       |  |  | 1.141 |       |       | SM.Only.Up.12H, EN.Only.Up.2H  |
| SERTAD1   | 1.579 |       |       |  |  | 1.278 |       |       | SM.Only.Up.12H, EN.Only.Up.2H  |
| TNFAIP3   | 3.249 |       |       |  |  | 1.357 |       |       | SM.Only.Up.12H, EN.Only.Up.2H  |
| ZNF1      | 1.704 |       |       |  |  | 1.047 |       |       | SM.Only.Up.12H, EN.Only.Up.2H  |
| ATP6V0E1  |       |       | 1.231 |  |  | 1.048 |       |       | SM.Only.Up.12H, EN.Only.Up.7D  |
| DONSON    |       |       | 1.348 |  |  | 1.232 |       |       | SM.Only.Up.12H, EN.Only.Up.7D  |
| GOSR1     |       |       | 1.006 |  |  | 1.24  |       |       | SM.Only.Up.12H, EN.Only.Up.7D  |
| ITGA5     |       |       | 1.225 |  |  | 1.027 |       |       | SM.Only.Up.12H, EN.Only.Up.7D  |
| LOC608355 |       |       | 1.038 |  |  | 1.35  |       |       | SM.Only.Up.12H, EN.Only.Up.7D  |
| LOC610510 |       |       | 1.57  |  |  | 1.336 |       |       | SM.Only.Up.12H, EN.Only.Up.7D  |
| LRFN4     |       |       | 2.135 |  |  | 1.317 |       |       | SM.Only.Up.12H, EN.Only.Up.7D  |
| NOL9      |       |       | 1.452 |  |  | 1.305 |       |       | SM.Only.Up.12H, EN.Only.Up.7D  |
| PGL5      |       |       | 1.6   |  |  | 1.25  |       |       | SM.Only.Up.12H, EN.Only.Up.7D  |
| PLEKHM1   |       |       | 1.096 |  |  | 1.059 |       |       | SM.Only.Up.12H, EN.Only.Up.7D  |
| PTRH1     |       |       | 1.055 |  |  | 2.033 |       |       | SM.Only.Up.12H, EN.Only.Up.7D  |
| RELN      |       |       | 1.349 |  |  | 1.895 |       |       | SM.Only.Up.12H, EN.Only.Up.7D  |
| RNASEK    |       |       | 1.114 |  |  | 1.056 |       |       | SM.Only.Up.12H, EN.Only.Up.7D  |
| SH3BGR13  |       |       | 1.052 |  |  | 1.324 |       |       | SM.Only.Up.12H, EN.Only.Up.7D  |
| SLC2A1    |       |       | 1.272 |  |  | 1.155 |       |       | SM.Only.Up.12H, EN.Only.Up.7D  |
| SLC4A2    |       |       | 1.056 |  |  | 1.596 |       |       | SM.Only.Up.12H, EN.Only.Up.7D  |
| TIMM8B    |       |       | 1.396 |  |  | 1.269 |       |       | SM.Only.Up.12H, EN.Only.Up.7D  |
| TNFAIP2   |       |       | 1.182 |  |  | 1.226 |       |       | SM.Only.Up.12H, EN.Only.Up.7D  |
| ALG3      |       |       |       |  |  | 1.398 | 1.85  |       | SM.Only.Up.12H, 24H            |
| ANGPT2    |       |       |       |  |  | 1.915 | 2.229 |       | SM.Only.Up.12H, 24H            |
| ANXA2     |       |       |       |  |  | 1.242 | 1.329 |       | SM.Only.Up.12H, 24H            |
| CLPTM1L   |       |       |       |  |  | 1.59  | 1.652 |       | SM.Only.Up.12H, 24H            |
| CUL1      |       |       |       |  |  | 2.546 | 1.486 |       | SM.Only.Up.12H, 24H            |
| DDX54     |       |       |       |  |  | 1.255 | 1.956 |       | SM.Only.Up.12H, 24H            |
| EMI4      |       |       |       |  |  | 1.975 | 1.527 |       | SM.Only.Up.12H, 24H            |
| GCSH      |       |       |       |  |  | 1.123 | 2.472 |       | SM.Only.Up.12H, 24H            |
| IL33      |       |       |       |  |  | 1.708 | 2.396 |       | SM.Only.Up.12H, 24H            |
| ILF3      |       |       |       |  |  | 1.613 | 2.102 |       | SM.Only.Up.12H, 24H            |
| ITPR2     |       |       |       |  |  | 1.15  | 2.241 |       | SM.Only.Up.12H, 24H            |
| MAPKSP1   |       |       |       |  |  | 1.01  | 1.567 |       | SM.Only.Up.12H, 24H            |
| MKI67IP   |       |       |       |  |  | 1.608 | 1.522 |       | SM.Only.Up.12H, 24H            |
| NAV3      |       |       |       |  |  | 1.562 | 2.749 |       | SM.Only.Up.12H, 24H            |
| POLR1A    |       |       |       |  |  | 1.489 | 1.854 |       | SM.Only.Up.12H, 24H            |
| POLR3D    |       |       |       |  |  | 1.435 | 1.624 |       | SM.Only.Up.12H, 24H            |
| PSMB10    |       |       |       |  |  | 1.074 | 2.212 |       | SM.Only.Up.12H, 24H            |
| PTGES     |       |       |       |  |  | 2.309 | 2.181 |       | SM.Only.Up.12H, 24H            |
| RANGRF    |       |       |       |  |  | 1.334 | 2.127 |       | SM.Only.Up.12H, 24H            |
| RUVBL1    |       |       |       |  |  | 1.085 | 1.332 |       | SM.Only.Up.12H, 24H            |
| SGK1      |       |       |       |  |  | 1.609 | 1.309 |       | SM.Only.Up.12H, 24H            |
| SLC25A35  |       |       |       |  |  | 1.643 | 1.462 |       | SM.Only.Up.12H, 24H            |
| TCDF1     |       |       |       |  |  | 1.449 | 1.553 |       | SM.Only.Up.12H, 24H            |
| TIMM8A    |       |       |       |  |  | 1.923 | 1.798 |       | SM.Only.Up.12H, 24H            |
| TMEM100   |       |       |       |  |  | 2.774 | 1.792 |       | SM.Only.Up.12H, 24H            |
| TMEM209   |       |       |       |  |  | 1.346 | 2.025 |       | SM.Only.Up.12H, 24H            |
| FOS       |       |       |       |  |  | 1.309 |       | 2.634 | SM.Only.Up.12H, 30D            |
| ACSL5     |       |       |       |  |  | 1.534 |       | 2.444 | SM.Only.Up.12H, 7D             |
| ALDH18A1  |       |       |       |  |  | 1.092 | 1.211 |       | SM.Only.Up.12H, 7D             |
| AMHD1     |       |       |       |  |  | 2.063 | 1.206 |       | SM.Only.Up.12H, 7D             |
| ANKAR     |       |       |       |  |  | 1.76  | 1.011 |       | SM.Only.Up.12H, 7D             |
| AP3S2     |       |       |       |  |  | 1.195 | 1.521 |       | SM.Only.Up.12H, 7D             |
| ARG1      |       |       |       |  |  | 1.854 | 1.124 |       | SM.Only.Up.12H, 7D             |
| ARG2      |       |       |       |  |  | 1.841 | 1.35  |       | SM.Only.Up.12H, 7D             |
| AZIN1     |       |       |       |  |  | 1.152 | 1.329 |       | SM.Only.Up.12H, 7D             |
| B2M       |       |       |       |  |  | 1.138 | 1.696 |       | SM.Only.Up.12H, 7D             |
| CD200R1   |       |       |       |  |  | 1.344 | 1.927 |       | SM.Only.Up.12H, 7D             |
| CD40      |       |       |       |  |  | 1.97  | 2.743 |       | SM.Only.Up.12H, 7D             |
| CD47      |       |       |       |  |  | 1.478 | 1.418 |       | SM.Only.Up.12H, 7D             |
| CSTF3     |       |       |       |  |  | 1.517 | 1.352 |       | SM.Only.Up.12H, 7D             |
| DCUN1D5   |       |       |       |  |  | 1.184 | 1.149 |       | SM.Only.Up.12H, 7D             |
| EIF1AD    |       |       |       |  |  | 1.071 | 2.026 |       | SM.Only.Up.12H, 7D             |
| ELK3      |       |       |       |  |  | 1.045 | 1.117 |       | SM.Only.Up.12H, 7D             |
| FANK1     |       |       |       |  |  | 1.207 | 1.794 |       | SM.Only.Up.12H, 7D             |
| FGF10     |       |       |       |  |  | 2.18  | 1.231 |       | SM.Only.Up.12H, 7D             |
| FLT1      |       |       |       |  |  | 1.429 | 1.659 |       | SM.Only.Up.12H, 7D             |
| FNDCCB    |       |       |       |  |  | 1.184 | 1.125 |       | SM.Only.Up.12H, 7D             |
| ICAM1     |       |       |       |  |  | 1.548 | 1.592 |       | SM.Only.Up.12H, 7D             |
| IL1R1     |       |       |       |  |  | 1.266 | 1.989 |       | SM.Only.Up.12H, 7D             |
| IL27RA    |       |       |       |  |  | 1.004 | 1.431 |       | SM.Only.Up.12H, 7D             |
| ISG15     |       |       |       |  |  | 1.228 | 4.621 |       | SM.Only.Up.12H, 7D             |
| ITPR1L1   |       |       |       |  |  | 2.199 | 1.396 |       | SM.Only.Up.12H, 7D             |
| KOFLR2    |       |       |       |  |  | 1.376 | 1.008 |       | SM.Only.Up.12H, 7D             |
| LAP3      |       |       |       |  |  | 1.606 | 1.399 |       | SM.Only.Up.12H, 7D             |
| LIMK2     |       |       |       |  |  | 1.13  | 1.522 |       | SM.Only.Up.12H, 7D             |
| LMO2      |       |       |       |  |  | 1.398 | 1.957 |       | SM.Only.Up.12H, 7D             |
| LOC475733 |       |       |       |  |  | 1.218 | 1.27  |       | SM.Only.Up.12H, 7D             |
| LOC478264 |       |       |       |  |  | 1.182 | 1.005 |       | SM.Only.Up.12H, 7D             |
| LOC483799 |       |       |       |  |  | 2.177 | 1.776 |       | SM.Only.Up.12H, 7D             |
| LOC608794 |       |       |       |  |  | 3.068 | 3.15  |       | SM.Only.Up.12H, 7D             |
| LOC612337 |       |       |       |  |  | 1.331 | 1.324 |       | SM.Only.Up.12H, 7D             |
| MARK3SL1  |       |       |       |  |  | 1.687 | 1.296 |       | SM.Only.Up.12H, 7D             |
| MX2       |       |       |       |  |  | 1.467 | 3.457 |       | SM.Only.Up.12H, 7D             |
| NLK       |       |       |       |  |  | 1.044 | 1.942 |       | SM.Only.Up.12H, 7D             |
| NME1-NME2 |       |       |       |  |  | 1.052 | 1.013 |       | SM.Only.Up.12H, 7D             |
| OSTC      |       |       |       |  |  | 1.126 | 1.748 |       | SM.Only.Up.12H, 7D             |
| OSTF1     |       |       |       |  |  | 1.182 | 1.315 |       | SM.Only.Up.12H, 7D             |
| PTPRJ     |       |       |       |  |  | 1.421 | 1.104 |       | SM.Only.Up.12H, 7D             |
| PUS7      |       |       |       |  |  | 1.852 | 1.224 |       | SM.Only.Up.12H, 7D             |
| RAB27A    |       |       |       |  |  | 1.793 | 1.533 |       | SM.Only.Up.12H, 7D             |
| RAB9A     |       |       |       |  |  | 1.185 | 1.047 |       | SM.Only.Up.12H, 7D             |
| RBKS      |       |       |       |  |  | 1.318 | 1.958 |       | SM.Only.Up.12H, 7D             |
| RDH10     |       |       |       |  |  | 3.126 | 1.134 |       | SM.Only.Up.12H, 7D             |
| SDCBP     |       |       |       |  |  | 1.026 | 1.164 |       | SM.Only.Up.12H, 7D             |
| SEC31A    |       |       |       |  |  | 1.062 | 1.105 |       | SM.Only.Up.12H, 7D             |
| Sec61b    |       |       |       |  |  | 1.048 | 1.202 |       | SM.Only.Up.12H, 7D             |
| SHC3      |       |       |       |  |  | 1.062 | 1.72  |       | SM.Only.Up.12H, 7D             |
| SLC11A2   |       |       |       |  |  | 1.512 | 1.32  |       | SM.Only.Up.12H, 7D             |
| SLC16A13  |       |       |       |  |  | 1.068 | 3.292 |       | SM.Only.Up.12H, 7D             |
| SLC41A2   |       |       |       |  |  | 1.089 | 1.238 |       | SM.Only.Up.12H, 7D             |
| SP100     |       |       |       |  |  | 1.333 | 1.781 |       | SM.Only.Up.12H, 7D             |
| STAT4     |       |       |       |  |  | 1.101 | 1.049 |       | SM.Only.Up.12H, 7D             |
| STT3A     |       |       |       |  |  | 1.049 | 1.015 |       | SM.Only.Up.12H, 7D             |
| TJP2      |       |       |       |  |  | 1.285 | 2.555 |       | SM.Only.Up.12H, 7D             |
| TMR5F1    |       |       |       |  |  | 1.245 | 1.045 |       | SM.Only.Up.12H, 7D             |
| TSEN2     |       |       |       |  |  | 1.167 | 1.048 |       | SM.Only.Up.12H, 7D             |
| TXNDC12   |       |       |       |  |  | 1.047 | 1.055 |       | SM.Only.Up.12H, 7D             |
| UAP1      |       |       |       |  |  | 1.464 | 1.17  |       | SM.Only.Up.12H, 7D             |
| ZNF281    |       |       |       |  |  | 1.583 | 1.116 |       | SM.Only.Up.12H, 7D             |
| BMP2      |       | 2.064 |       |  |  | 1.508 | 1.998 |       | SM.Only.Up.24H, EN.Only.Up.12H |
| EMP3      |       | 1.462 |       |  |  | 1.647 | 2.055 |       | SM.Only.Up.24H, EN.Only.Up.12H |
| FNI       |       |       | 1.192 |  |  | 1.361 |       |       | SM.Only.Up.24H, EN.Only.Up.7D  |



|                 |       |  |       |  |  |  |  |  |                |
|-----------------|-------|--|-------|--|--|--|--|--|----------------|
| DDHD1           |       |  | 2.276 |  |  |  |  |  | EN.Only.Up.24H |
| DENR            |       |  | 1.177 |  |  |  |  |  | EN.Only.Up.24H |
| DFNA5           |       |  | 1.606 |  |  |  |  |  | EN.Only.Up.24H |
| EXOSC1          |       |  | 1.285 |  |  |  |  |  | EN.Only.Up.24H |
| EZR             |       |  | 1.222 |  |  |  |  |  | EN.Only.Up.24H |
| F13A1           |       |  | 3.609 |  |  |  |  |  | EN.Only.Up.24H |
| FCER1A          |       |  | 1.912 |  |  |  |  |  | EN.Only.Up.24H |
| GKS             |       |  | 1.182 |  |  |  |  |  | EN.Only.Up.24H |
| GNB1            |       |  | 1.05  |  |  |  |  |  | EN.Only.Up.24H |
| GSS             |       |  | 1.035 |  |  |  |  |  | EN.Only.Up.24H |
| HGF             |       |  | 2.56  |  |  |  |  |  | EN.Only.Up.24H |
| HSF2            |       |  | 1.808 |  |  |  |  |  | EN.Only.Up.24H |
| IRF5            |       |  | 1.175 |  |  |  |  |  | EN.Only.Up.24H |
| ITGA2           |       |  | 2.946 |  |  |  |  |  | EN.Only.Up.24H |
| JARID2          |       |  | 1.422 |  |  |  |  |  | EN.Only.Up.24H |
| KCNRG           |       |  | 2.16  |  |  |  |  |  | EN.Only.Up.24H |
| LIG4            |       |  | 1.459 |  |  |  |  |  | EN.Only.Up.24H |
| LOC474690       |       |  | 1.136 |  |  |  |  |  | EN.Only.Up.24H |
| LOC474869       |       |  | 2.142 |  |  |  |  |  | EN.Only.Up.24H |
| LOC475725       |       |  | 1.298 |  |  |  |  |  | EN.Only.Up.24H |
| LOC476908       |       |  | 1.484 |  |  |  |  |  | EN.Only.Up.24H |
| LOC478620       |       |  | 1.691 |  |  |  |  |  | EN.Only.Up.24H |
| LOC481569       |       |  | 1.609 |  |  |  |  |  | EN.Only.Up.24H |
| LOC486627       |       |  | 1.489 |  |  |  |  |  | EN.Only.Up.24H |
| LOC488965       |       |  | 1.12  |  |  |  |  |  | EN.Only.Up.24H |
| LOC491323       |       |  | 1.1   |  |  |  |  |  | EN.Only.Up.24H |
| LOC611683       |       |  | 1.88  |  |  |  |  |  | EN.Only.Up.24H |
| LPH2            |       |  | 1.885 |  |  |  |  |  | EN.Only.Up.24H |
| MARCO           |       |  | 1.404 |  |  |  |  |  | EN.Only.Up.24H |
| MCM7            |       |  | 1.893 |  |  |  |  |  | EN.Only.Up.24H |
| ME2             |       |  | 1.027 |  |  |  |  |  | EN.Only.Up.24H |
| MRPL20          |       |  | 1.09  |  |  |  |  |  | EN.Only.Up.24H |
| MRPS14          |       |  | 1.518 |  |  |  |  |  | EN.Only.Up.24H |
| NAP1L1          |       |  | 1.072 |  |  |  |  |  | EN.Only.Up.24H |
| NDUFAB1         |       |  | 1.408 |  |  |  |  |  | EN.Only.Up.24H |
| NUP107          |       |  | 1.363 |  |  |  |  |  | EN.Only.Up.24H |
| OGRN1           |       |  | 1.269 |  |  |  |  |  | EN.Only.Up.24H |
| OLA1            |       |  | 1.061 |  |  |  |  |  | EN.Only.Up.24H |
| OSBP13          |       |  | 1.932 |  |  |  |  |  | EN.Only.Up.24H |
| PCCA            |       |  | 1.157 |  |  |  |  |  | EN.Only.Up.24H |
| PLDN            |       |  | 1.827 |  |  |  |  |  | EN.Only.Up.24H |
| POLR2G          |       |  | 1.418 |  |  |  |  |  | EN.Only.Up.24H |
| PPP1G           |       |  | 1.229 |  |  |  |  |  | EN.Only.Up.24H |
| RAP1GDS1        |       |  | 1.092 |  |  |  |  |  | EN.Only.Up.24H |
| RDH11           |       |  | 1.162 |  |  |  |  |  | EN.Only.Up.24H |
| SEN8            |       |  | 1.248 |  |  |  |  |  | EN.Only.Up.24H |
| SERAC1          |       |  | 1.584 |  |  |  |  |  | EN.Only.Up.24H |
| SLC23A1         |       |  | 1.372 |  |  |  |  |  | EN.Only.Up.24H |
| SLC25A16        |       |  | 1.82  |  |  |  |  |  | EN.Only.Up.24H |
| SNAPC4          |       |  | 1.229 |  |  |  |  |  | EN.Only.Up.24H |
| SPAST           |       |  | 1.025 |  |  |  |  |  | EN.Only.Up.24H |
| SR05A2          |       |  | 1.268 |  |  |  |  |  | EN.Only.Up.24H |
| TATDN3          |       |  | 1.626 |  |  |  |  |  | EN.Only.Up.24H |
| TBC1D14         |       |  | 1.125 |  |  |  |  |  | EN.Only.Up.24H |
| TET2            |       |  | 1.094 |  |  |  |  |  | EN.Only.Up.24H |
| TGS1            |       |  | 1.147 |  |  |  |  |  | EN.Only.Up.24H |
| TMCC1           |       |  | 1.532 |  |  |  |  |  | EN.Only.Up.24H |
| TMEM126B        |       |  | 1.277 |  |  |  |  |  | EN.Only.Up.24H |
| TNFSF12-TNFSF13 |       |  | 1.451 |  |  |  |  |  | EN.Only.Up.24H |
| TNFSF8          |       |  | 1.434 |  |  |  |  |  | EN.Only.Up.24H |
| TRMT5           |       |  | 1.689 |  |  |  |  |  | EN.Only.Up.24H |
| TYRO3           |       |  | 1.07  |  |  |  |  |  | EN.Only.Up.24H |
| UBLCP1          |       |  | 1.345 |  |  |  |  |  | EN.Only.Up.24H |
| UNC119B         |       |  | 1.564 |  |  |  |  |  | EN.Only.Up.24H |
| UPK2            |       |  | 2.407 |  |  |  |  |  | EN.Only.Up.24H |
| USD1            |       |  | 1.447 |  |  |  |  |  | EN.Only.Up.24H |
| USP24           |       |  | 1.174 |  |  |  |  |  | EN.Only.Up.24H |
| VRR1            |       |  | 1.696 |  |  |  |  |  | EN.Only.Up.24H |
| ZSCAN20         |       |  | 1.222 |  |  |  |  |  | EN.Only.Up.24H |
| ADSSL1          | 1.399 |  |       |  |  |  |  |  | EN.Only.Up.2H  |
| ALDH4A1         | 1.63  |  |       |  |  |  |  |  | EN.Only.Up.2H  |
| ARIH1           | 1.443 |  |       |  |  |  |  |  | EN.Only.Up.2H  |
| BHLHE40         | 1.78  |  |       |  |  |  |  |  | EN.Only.Up.2H  |
| CDR2            | 1.627 |  |       |  |  |  |  |  | EN.Only.Up.2H  |
| CSF2            | 4.862 |  |       |  |  |  |  |  | EN.Only.Up.2H  |
| ELL2            | 2.407 |  |       |  |  |  |  |  | EN.Only.Up.2H  |
| ETS2            | 2.042 |  |       |  |  |  |  |  | EN.Only.Up.2H  |
| GGNBP2          | 2.144 |  |       |  |  |  |  |  | EN.Only.Up.2H  |
| GNA13           | 1.675 |  |       |  |  |  |  |  | EN.Only.Up.2H  |
| INSIG1          | 1.769 |  |       |  |  |  |  |  | EN.Only.Up.2H  |
| LOC488214       | 1.859 |  |       |  |  |  |  |  | EN.Only.Up.2H  |
| LOC488486       | 1.457 |  |       |  |  |  |  |  | EN.Only.Up.2H  |
| LOC608512       | 1.687 |  |       |  |  |  |  |  | EN.Only.Up.2H  |
| LOHRF1          | 1.332 |  |       |  |  |  |  |  | EN.Only.Up.2H  |
| LRRFP2          | 1.311 |  |       |  |  |  |  |  | EN.Only.Up.2H  |
| PMP22           | 1.432 |  |       |  |  |  |  |  | EN.Only.Up.2H  |
| RBBP6           | 1.437 |  |       |  |  |  |  |  | EN.Only.Up.2H  |
| RGS16           | 1.777 |  |       |  |  |  |  |  | EN.Only.Up.2H  |
| RND1            | 1.526 |  |       |  |  |  |  |  | EN.Only.Up.2H  |
| RND3            | 1.661 |  |       |  |  |  |  |  | EN.Only.Up.2H  |
| SGMS2           | 1.762 |  |       |  |  |  |  |  | EN.Only.Up.2H  |
| TRA2A           | 1.668 |  |       |  |  |  |  |  | EN.Only.Up.2H  |
| TRAPP9          | 1.631 |  |       |  |  |  |  |  | EN.Only.Up.2H  |
| TSC22D2         | 2.333 |  |       |  |  |  |  |  | EN.Only.Up.2H  |
| ZNF217          | 1.363 |  |       |  |  |  |  |  | EN.Only.Up.2H  |
| ZNF509          | 1.64  |  |       |  |  |  |  |  | EN.Only.Up.2H  |
| ZNF622          | 1.558 |  |       |  |  |  |  |  | EN.Only.Up.2H  |
| AACS            |       |  | 1.493 |  |  |  |  |  | EN.Only.Up.7D  |
| ABCA1           |       |  | 1.169 |  |  |  |  |  | EN.Only.Up.7D  |
| ALDH16A1        |       |  | 2.012 |  |  |  |  |  | EN.Only.Up.7D  |
| ALDH5A1         |       |  | 1.178 |  |  |  |  |  | EN.Only.Up.7D  |
| ALG9            |       |  | 1.044 |  |  |  |  |  | EN.Only.Up.7D  |
| ARD1A           |       |  | 1.077 |  |  |  |  |  | EN.Only.Up.7D  |
| ARHGAP23        |       |  | 1.169 |  |  |  |  |  | EN.Only.Up.7D  |
| ARSB            |       |  | 2.75  |  |  |  |  |  | EN.Only.Up.7D  |
| ATADS           |       |  | 1.598 |  |  |  |  |  | EN.Only.Up.7D  |
| ATP6AP1         |       |  | 1.462 |  |  |  |  |  | EN.Only.Up.7D  |
| B4GALNT1        |       |  | 1.438 |  |  |  |  |  | EN.Only.Up.7D  |
| BCL10           |       |  | 1.446 |  |  |  |  |  | EN.Only.Up.7D  |
| BLVRB           |       |  | 1.288 |  |  |  |  |  | EN.Only.Up.7D  |
| BMP1            |       |  | 1.609 |  |  |  |  |  | EN.Only.Up.7D  |
| C1R             |       |  | 2.733 |  |  |  |  |  | EN.Only.Up.7D  |
| CALM3           |       |  | 1.35  |  |  |  |  |  | EN.Only.Up.7D  |
| CAMK2A          |       |  | 2.062 |  |  |  |  |  | EN.Only.Up.7D  |
| CCNB3           |       |  | 1.052 |  |  |  |  |  | EN.Only.Up.7D  |
| CCNE1           |       |  | 1.976 |  |  |  |  |  | EN.Only.Up.7D  |
| CD163           |       |  | 1.712 |  |  |  |  |  | EN.Only.Up.7D  |
| CD36            |       |  | 4.462 |  |  |  |  |  | EN.Only.Up.7D  |
| CDC25A          |       |  | 1.614 |  |  |  |  |  | EN.Only.Up.7D  |
| CDC45L          |       |  | 1.197 |  |  |  |  |  | EN.Only.Up.7D  |
| CDIPT           |       |  | 1.214 |  |  |  |  |  | EN.Only.Up.7D  |
| CDT1            |       |  | 1.276 |  |  |  |  |  | EN.Only.Up.7D  |
| CHEK1           |       |  | 1.525 |  |  |  |  |  | EN.Only.Up.7D  |

|           |       |  |  |       |  |       |  |  |                                  |
|-----------|-------|--|--|-------|--|-------|--|--|----------------------------------|
| CLCN5     |       |  |  | 1.161 |  |       |  |  | EN.Only.Up.7D                    |
| CRVBG3    |       |  |  | 1.056 |  |       |  |  | EN.Only.Up.7D                    |
| CTS2      |       |  |  | 1.682 |  |       |  |  | EN.Only.Up.7D                    |
| CTS2      |       |  |  | 1.807 |  |       |  |  | EN.Only.Up.7D                    |
| CYP19     |       |  |  | 1.406 |  |       |  |  | EN.Only.Up.7D                    |
| DAP       |       |  |  | 1.225 |  |       |  |  | EN.Only.Up.7D                    |
| DIABLO    |       |  |  | 1.041 |  |       |  |  | EN.Only.Up.7D                    |
| DIP2B     |       |  |  | 1.104 |  |       |  |  | EN.Only.Up.7D                    |
| ENG       |       |  |  | 1.189 |  |       |  |  | EN.Only.Up.7D                    |
| END1      |       |  |  | 1.149 |  |       |  |  | EN.Only.Up.7D                    |
| F11       |       |  |  | 1.931 |  |       |  |  | EN.Only.Up.7D                    |
| FEZ2      |       |  |  | 1.01  |  |       |  |  | EN.Only.Up.7D                    |
| FRBP10    |       |  |  | 2.209 |  |       |  |  | EN.Only.Up.7D                    |
| FLRT2     |       |  |  | 1.751 |  |       |  |  | EN.Only.Up.7D                    |
| FTL       |       |  |  | 1.968 |  |       |  |  | EN.Only.Up.7D                    |
| GIMAP8    |       |  |  | 1.017 |  |       |  |  | EN.Only.Up.7D                    |
| GLT2SD1   |       |  |  | 1.632 |  |       |  |  | EN.Only.Up.7D                    |
| GNPMB     |       |  |  | 4.376 |  |       |  |  | EN.Only.Up.7D                    |
| GRN       |       |  |  | 1.138 |  |       |  |  | EN.Only.Up.7D                    |
| GSR       |       |  |  | 1.234 |  |       |  |  | EN.Only.Up.7D                    |
| GUSB      |       |  |  | 1.518 |  |       |  |  | EN.Only.Up.7D                    |
| HERC2     |       |  |  | 1.466 |  |       |  |  | EN.Only.Up.7D                    |
| HMOX1     |       |  |  | 1.011 |  |       |  |  | EN.Only.Up.7D                    |
| KCNA3     |       |  |  | 1.196 |  |       |  |  | EN.Only.Up.7D                    |
| KIF2C     |       |  |  | 1.99  |  |       |  |  | EN.Only.Up.7D                    |
| KLHL5     |       |  |  | 1.023 |  |       |  |  | EN.Only.Up.7D                    |
| KYNU      |       |  |  | 1.079 |  |       |  |  | EN.Only.Up.7D                    |
| LGALS3BP  |       |  |  | 1.126 |  |       |  |  | EN.Only.Up.7D                    |
| LGAMN     |       |  |  | 1.235 |  |       |  |  | EN.Only.Up.7D                    |
| MLN       |       |  |  | 1.07  |  |       |  |  | EN.Only.Up.7D                    |
| LOC474990 |       |  |  | 1.668 |  |       |  |  | EN.Only.Up.7D                    |
| LOC478556 |       |  |  | 1.272 |  |       |  |  | EN.Only.Up.7D                    |
| LOC479329 |       |  |  | 2.356 |  |       |  |  | EN.Only.Up.7D                    |
| LOC480000 |       |  |  | 1.113 |  |       |  |  | EN.Only.Up.7D                    |
| LOC480764 |       |  |  | 1.181 |  |       |  |  | EN.Only.Up.7D                    |
| LOC482035 |       |  |  | 1.274 |  |       |  |  | EN.Only.Up.7D                    |
| LOC482284 |       |  |  | 1.673 |  |       |  |  | EN.Only.Up.7D                    |
| LOC482624 |       |  |  | 3.531 |  |       |  |  | EN.Only.Up.7D                    |
| LOC482707 |       |  |  | 1.142 |  |       |  |  | EN.Only.Up.7D                    |
| LOC483168 |       |  |  | 1.281 |  |       |  |  | EN.Only.Up.7D                    |
| LOC483279 |       |  |  | 1.786 |  |       |  |  | EN.Only.Up.7D                    |
| LOC491671 |       |  |  | 1.018 |  |       |  |  | EN.Only.Up.7D                    |
| LOC606842 |       |  |  | 1.173 |  |       |  |  | EN.Only.Up.7D                    |
| LOC607130 |       |  |  | 1.258 |  |       |  |  | EN.Only.Up.7D                    |
| LOC607158 |       |  |  | 1.237 |  |       |  |  | EN.Only.Up.7D                    |
| LOC607448 |       |  |  | 3.981 |  |       |  |  | EN.Only.Up.7D                    |
| LOC607800 |       |  |  | 1.034 |  |       |  |  | EN.Only.Up.7D                    |
| LOC607937 |       |  |  | 1.289 |  |       |  |  | EN.Only.Up.7D                    |
| LOC608066 |       |  |  | 1.101 |  |       |  |  | EN.Only.Up.7D                    |
| LOC608500 |       |  |  | 1.692 |  |       |  |  | EN.Only.Up.7D                    |
| LRP1      |       |  |  | 1.334 |  |       |  |  | EN.Only.Up.7D                    |
| LRTOMT    |       |  |  | 1.197 |  |       |  |  | EN.Only.Up.7D                    |
| MSPR      |       |  |  | 1.016 |  |       |  |  | EN.Only.Up.7D                    |
| MAN2B1    |       |  |  | 1.099 |  |       |  |  | EN.Only.Up.7D                    |
| MYBL2     |       |  |  | 1.384 |  |       |  |  | EN.Only.Up.7D                    |
| MYO1D     |       |  |  | 1.189 |  |       |  |  | EN.Only.Up.7D                    |
| MYOSA     |       |  |  | 1.129 |  |       |  |  | EN.Only.Up.7D                    |
| NGAMT2    |       |  |  | 1.086 |  |       |  |  | EN.Only.Up.7D                    |
| NAGLU     |       |  |  | 1.435 |  |       |  |  | EN.Only.Up.7D                    |
| NMRAL1    |       |  |  | 1.71  |  |       |  |  | EN.Only.Up.7D                    |
| NRS42     |       |  |  | 1.069 |  |       |  |  | EN.Only.Up.7D                    |
| OAS1      |       |  |  | 3.502 |  |       |  |  | EN.Only.Up.7D                    |
| PACS2     |       |  |  | 1.002 |  |       |  |  | EN.Only.Up.7D                    |
| PCOLCE    |       |  |  | 1.781 |  |       |  |  | EN.Only.Up.7D                    |
| PLCL2     |       |  |  | 1.178 |  |       |  |  | EN.Only.Up.7D                    |
| PLVAP     |       |  |  | 2.03  |  |       |  |  | EN.Only.Up.7D                    |
| PPM1J     |       |  |  | 1.033 |  |       |  |  | EN.Only.Up.7D                    |
| PRDM1     |       |  |  | 2.06  |  |       |  |  | EN.Only.Up.7D                    |
| PRRG1     |       |  |  | 1.133 |  |       |  |  | EN.Only.Up.7D                    |
| PTGR1     |       |  |  | 1.295 |  |       |  |  | EN.Only.Up.7D                    |
| PYCARD    |       |  |  | 1.106 |  |       |  |  | EN.Only.Up.7D                    |
| RAB6B     |       |  |  | 1.038 |  |       |  |  | EN.Only.Up.7D                    |
| RAD54L    |       |  |  | 1.753 |  |       |  |  | EN.Only.Up.7D                    |
| RG51      |       |  |  | 1.238 |  |       |  |  | EN.Only.Up.7D                    |
| RNASET2   |       |  |  | 1.271 |  |       |  |  | EN.Only.Up.7D                    |
| SCD       |       |  |  | 1.322 |  |       |  |  | EN.Only.Up.7D                    |
| SEC11C    |       |  |  | 1.188 |  |       |  |  | EN.Only.Up.7D                    |
| SEC16A    |       |  |  | 1.558 |  |       |  |  | EN.Only.Up.7D                    |
| SERPINB1  |       |  |  | 1.309 |  |       |  |  | EN.Only.Up.7D                    |
| SFXN1     |       |  |  | 1.558 |  |       |  |  | EN.Only.Up.7D                    |
| SLC25A39  |       |  |  | 1.232 |  |       |  |  | EN.Only.Up.7D                    |
| SLCA411   |       |  |  | 1.419 |  |       |  |  | EN.Only.Up.7D                    |
| SLCO2A1   |       |  |  | 1.954 |  |       |  |  | EN.Only.Up.7D                    |
| SMG1      |       |  |  | 1.325 |  |       |  |  | EN.Only.Up.7D                    |
| SNKG      |       |  |  | 1.202 |  |       |  |  | EN.Only.Up.7D                    |
| STAB1     |       |  |  | 1.687 |  |       |  |  | EN.Only.Up.7D                    |
| STK11P    |       |  |  | 1.263 |  |       |  |  | EN.Only.Up.7D                    |
| SYN3      |       |  |  | 1.743 |  |       |  |  | EN.Only.Up.7D                    |
| TNFRSF11B |       |  |  | 1.518 |  |       |  |  | EN.Only.Up.7D                    |
| TNNT2     |       |  |  | 1.044 |  |       |  |  | EN.Only.Up.7D                    |
| TREML1    |       |  |  | 3.343 |  |       |  |  | EN.Only.Up.7D                    |
| TTYH3     |       |  |  | 1.703 |  |       |  |  | EN.Only.Up.7D                    |
| YKT6      |       |  |  | 1.057 |  |       |  |  | EN.Only.Up.7D                    |
| LOC477487 |       |  |  |       |  | 1.276 |  |  | SM.Only.Down.12H, SM.Only.Up.12H |
|           | 3-Mar |  |  |       |  | 1.241 |  |  | SM.Only.Up.12H                   |
| ABT1      |       |  |  |       |  | 1.462 |  |  | SM.Only.Up.12H                   |
| ACTR1A    |       |  |  |       |  | 1.119 |  |  | SM.Only.Up.12H                   |
| ACVRL1    |       |  |  |       |  | 1.439 |  |  | SM.Only.Up.12H                   |
| ADAM9     |       |  |  |       |  | 1.491 |  |  | SM.Only.Up.12H                   |
| ADCY4     |       |  |  |       |  | 1.46  |  |  | SM.Only.Up.12H                   |
| AGFG1     |       |  |  |       |  | 1.105 |  |  | SM.Only.Up.12H                   |
| AKRIN2    |       |  |  |       |  | 1.037 |  |  | SM.Only.Up.12H                   |
| ALAS1     |       |  |  |       |  | 1.694 |  |  | SM.Only.Up.12H                   |
| ALG8      |       |  |  |       |  | 1.011 |  |  | SM.Only.Up.12H                   |
| ALX1      |       |  |  |       |  | 1.998 |  |  | SM.Only.Up.12H                   |
| ANGPTL4   |       |  |  |       |  | 1.852 |  |  | SM.Only.Up.12H                   |
| ANKRD1    |       |  |  |       |  | 1.013 |  |  | SM.Only.Up.12H                   |
| ANKRD11   |       |  |  |       |  | 1.023 |  |  | SM.Only.Up.12H                   |
| ANXA1     |       |  |  |       |  | 1.17  |  |  | SM.Only.Up.12H                   |
| AP2B1     |       |  |  |       |  | 1.086 |  |  | SM.Only.Up.12H                   |
| AP2S1     |       |  |  |       |  | 1.025 |  |  | SM.Only.Up.12H                   |
| APEX1     |       |  |  |       |  | 1.011 |  |  | SM.Only.Up.12H                   |
| APITD1    |       |  |  |       |  | 1.546 |  |  | SM.Only.Up.12H                   |
| ARAP3     |       |  |  |       |  | 1.213 |  |  | SM.Only.Up.12H                   |
| ARNTL     |       |  |  |       |  | 1.283 |  |  | SM.Only.Up.12H                   |
| ATF1      |       |  |  |       |  | 1.04  |  |  | SM.Only.Up.12H                   |
| ATG3      |       |  |  |       |  | 1.205 |  |  | SM.Only.Up.12H                   |
| AVIL      |       |  |  |       |  | 1.141 |  |  | SM.Only.Up.12H                   |
| B4GALT5   |       |  |  |       |  | 2.362 |  |  | SM.Only.Up.12H                   |
| BAT1      |       |  |  |       |  | 1.021 |  |  | SM.Only.Up.12H                   |
| BATF3     |       |  |  |       |  | 1.263 |  |  | SM.Only.Up.12H                   |
| BCCIP     |       |  |  |       |  | 1.215 |  |  | SM.Only.Up.12H                   |
| BEST1     |       |  |  |       |  | 2.2   |  |  | SM.Only.Up.12H                   |



|         |  |  |  |  |  |       |  |  |  |                |
|---------|--|--|--|--|--|-------|--|--|--|----------------|
| BET1    |  |  |  |  |  | 1.014 |  |  |  | SM.Only.Up.12H |
| BFGF    |  |  |  |  |  | 1.257 |  |  |  | SM.Only.Up.12H |
| BIRC2   |  |  |  |  |  | 1.044 |  |  |  | SM.Only.Up.12H |
| BLDC1S2 |  |  |  |  |  | 1.755 |  |  |  | SM.Only.Up.12H |
| BMS1    |  |  |  |  |  | 1.008 |  |  |  | SM.Only.Up.12H |
| BMX     |  |  |  |  |  | 1.558 |  |  |  | SM.Only.Up.12H |
| BOD1    |  |  |  |  |  | 1.093 |  |  |  | SM.Only.Up.12H |
| BRD2    |  |  |  |  |  | 1.067 |  |  |  | SM.Only.Up.12H |
| BTBD10  |  |  |  |  |  | 1.062 |  |  |  | SM.Only.Up.12H |
| C1QB1   |  |  |  |  |  | 1.18  |  |  |  | SM.Only.Up.12H |
| C2CD2L  |  |  |  |  |  | 1.06  |  |  |  | SM.Only.Up.12H |
| CABYR   |  |  |  |  |  | 1.474 |  |  |  | SM.Only.Up.12H |
| CAMK1D  |  |  |  |  |  | 1.061 |  |  |  | SM.Only.Up.12H |
| CCDC117 |  |  |  |  |  | 1.098 |  |  |  | SM.Only.Up.12H |
| CCL20   |  |  |  |  |  | 2.178 |  |  |  | SM.Only.Up.12H |
| CCNC    |  |  |  |  |  | 1.023 |  |  |  | SM.Only.Up.12H |
| CCT3    |  |  |  |  |  | 1.397 |  |  |  | SM.Only.Up.12H |
| CDK4    |  |  |  |  |  | 1.219 |  |  |  | SM.Only.Up.12H |
| CEACAM1 |  |  |  |  |  | 1.143 |  |  |  | SM.Only.Up.12H |
| CEACAM7 |  |  |  |  |  | 1.167 |  |  |  | SM.Only.Up.12H |
| CFLAR   |  |  |  |  |  | 1.204 |  |  |  | SM.Only.Up.12H |
| CHCHD1  |  |  |  |  |  | 1.034 |  |  |  | SM.Only.Up.12H |
| CHD1L   |  |  |  |  |  | 1.222 |  |  |  | SM.Only.Up.12H |
| CHPT1   |  |  |  |  |  | 1.328 |  |  |  | SM.Only.Up.12H |
| CHST11  |  |  |  |  |  | 1.569 |  |  |  | SM.Only.Up.12H |
| CISD2   |  |  |  |  |  | 1.182 |  |  |  | SM.Only.Up.12H |
| CLC12B  |  |  |  |  |  | 1.773 |  |  |  | SM.Only.Up.12H |
| CNOT5   |  |  |  |  |  | 1.278 |  |  |  | SM.Only.Up.12H |
| CNTNAP5 |  |  |  |  |  | 1.121 |  |  |  | SM.Only.Up.12H |
| COBS1H3 |  |  |  |  |  | 1.476 |  |  |  | SM.Only.Up.12H |
| COBS9A7 |  |  |  |  |  | 1.872 |  |  |  | SM.Only.Up.12H |
| CR2     |  |  |  |  |  | 1.34  |  |  |  | SM.Only.Up.12H |
| CSTF2   |  |  |  |  |  | 1.106 |  |  |  | SM.Only.Up.12H |
| CUTC    |  |  |  |  |  | 1.054 |  |  |  | SM.Only.Up.12H |
| CXCL12  |  |  |  |  |  | 1.016 |  |  |  | SM.Only.Up.12H |
| CYBP2   |  |  |  |  |  | 1.151 |  |  |  | SM.Only.Up.12H |
| CYTH1   |  |  |  |  |  | 1.199 |  |  |  | SM.Only.Up.12H |
| DAPP1   |  |  |  |  |  | 1.164 |  |  |  | SM.Only.Up.12H |
| DDAF13  |  |  |  |  |  | 1.17  |  |  |  | SM.Only.Up.12H |
| DDAH1   |  |  |  |  |  | 1.335 |  |  |  | SM.Only.Up.12H |
| DDX27   |  |  |  |  |  | 1.191 |  |  |  | SM.Only.Up.12H |
| DDX3X   |  |  |  |  |  | 1.318 |  |  |  | SM.Only.Up.12H |
| DDX49   |  |  |  |  |  | 1.363 |  |  |  | SM.Only.Up.12H |
| DEDD2   |  |  |  |  |  | 1.235 |  |  |  | SM.Only.Up.12H |
| DENND4A |  |  |  |  |  | 1.293 |  |  |  | SM.Only.Up.12H |
| DHODH   |  |  |  |  |  | 1.015 |  |  |  | SM.Only.Up.12H |
| DHR59   |  |  |  |  |  | 1.176 |  |  |  | SM.Only.Up.12H |
| DLA-12  |  |  |  |  |  | 1.054 |  |  |  | SM.Only.Up.12H |
| DNER    |  |  |  |  |  | 1.203 |  |  |  | SM.Only.Up.12H |
| DOC2B   |  |  |  |  |  | 1.237 |  |  |  | SM.Only.Up.12H |
| DRAM1   |  |  |  |  |  | 1.78  |  |  |  | SM.Only.Up.12H |
| DRAP1   |  |  |  |  |  | 1.051 |  |  |  | SM.Only.Up.12H |
| DUS1L   |  |  |  |  |  | 1.18  |  |  |  | SM.Only.Up.12H |
| DUSP1   |  |  |  |  |  | 1.155 |  |  |  | SM.Only.Up.12H |
| DUSP6   |  |  |  |  |  | 1.361 |  |  |  | SM.Only.Up.12H |
| E2F5    |  |  |  |  |  | 2.372 |  |  |  | SM.Only.Up.12H |
| EDARADD |  |  |  |  |  | 1.252 |  |  |  | SM.Only.Up.12H |
| EHD4    |  |  |  |  |  | 1.203 |  |  |  | SM.Only.Up.12H |
| EIF3J   |  |  |  |  |  | 1.135 |  |  |  | SM.Only.Up.12H |
| ELF1    |  |  |  |  |  | 1.128 |  |  |  | SM.Only.Up.12H |
| ELF2    |  |  |  |  |  | 1.115 |  |  |  | SM.Only.Up.12H |
| ELL     |  |  |  |  |  | 1.144 |  |  |  | SM.Only.Up.12H |
| ELMOD3  |  |  |  |  |  | 1.001 |  |  |  | SM.Only.Up.12H |
| ELP2    |  |  |  |  |  | 1.001 |  |  |  | SM.Only.Up.12H |
| EMG1    |  |  |  |  |  | 1.339 |  |  |  | SM.Only.Up.12H |
| EXOSC4  |  |  |  |  |  | 1.608 |  |  |  | SM.Only.Up.12H |
| FADS1   |  |  |  |  |  | 1.343 |  |  |  | SM.Only.Up.12H |
| FASTKD2 |  |  |  |  |  | 1.103 |  |  |  | SM.Only.Up.12H |
| FBLN5   |  |  |  |  |  | 1.032 |  |  |  | SM.Only.Up.12H |
| FICD    |  |  |  |  |  | 1.273 |  |  |  | SM.Only.Up.12H |
| FLOT1   |  |  |  |  |  | 1.614 |  |  |  | SM.Only.Up.12H |
| FNIP2   |  |  |  |  |  | 1.033 |  |  |  | SM.Only.Up.12H |
| FOX51   |  |  |  |  |  | 1.148 |  |  |  | SM.Only.Up.12H |
| FRMD6   |  |  |  |  |  | 1.313 |  |  |  | SM.Only.Up.12H |
| GGPD    |  |  |  |  |  | 2.139 |  |  |  | SM.Only.Up.12H |
| GAR1    |  |  |  |  |  | 1.122 |  |  |  | SM.Only.Up.12H |
| GARNL3  |  |  |  |  |  | 1.251 |  |  |  | SM.Only.Up.12H |
| GCAT    |  |  |  |  |  | 1.406 |  |  |  | SM.Only.Up.12H |
| GEMIN5  |  |  |  |  |  | 1.317 |  |  |  | SM.Only.Up.12H |
| GLIS3   |  |  |  |  |  | 1.025 |  |  |  | SM.Only.Up.12H |
| GLUL    |  |  |  |  |  | 1.17  |  |  |  | SM.Only.Up.12H |
| GMEB1   |  |  |  |  |  | 1.12  |  |  |  | SM.Only.Up.12H |
| GNAT2   |  |  |  |  |  | 1.005 |  |  |  | SM.Only.Up.12H |
| GNL2    |  |  |  |  |  | 1.048 |  |  |  | SM.Only.Up.12H |
| GNL3    |  |  |  |  |  | 1.332 |  |  |  | SM.Only.Up.12H |
| GPR97   |  |  |  |  |  | 1.435 |  |  |  | SM.Only.Up.12H |
| GREM1   |  |  |  |  |  | 1.684 |  |  |  | SM.Only.Up.12H |
| GRINA   |  |  |  |  |  | 1.161 |  |  |  | SM.Only.Up.12H |
| GRK5    |  |  |  |  |  | 1.075 |  |  |  | SM.Only.Up.12H |
| GRPEL2  |  |  |  |  |  | 1.147 |  |  |  | SM.Only.Up.12H |
| GSPT1   |  |  |  |  |  | 1.15  |  |  |  | SM.Only.Up.12H |
| HCF2    |  |  |  |  |  | 1.809 |  |  |  | SM.Only.Up.12H |
| HDHD2   |  |  |  |  |  | 1.109 |  |  |  | SM.Only.Up.12H |
| HIF1A   |  |  |  |  |  | 1.014 |  |  |  | SM.Only.Up.12H |
| HK2     |  |  |  |  |  | 1.448 |  |  |  | SM.Only.Up.12H |
| HNRNPH1 |  |  |  |  |  | 1.028 |  |  |  | SM.Only.Up.12H |
| HNRNPU  |  |  |  |  |  | 1.159 |  |  |  | SM.Only.Up.12H |
| HSD11B1 |  |  |  |  |  | 1.262 |  |  |  | SM.Only.Up.12H |
| HUS1    |  |  |  |  |  | 1.216 |  |  |  | SM.Only.Up.12H |
| IARS    |  |  |  |  |  | 1.164 |  |  |  | SM.Only.Up.12H |
| IFNGR1  |  |  |  |  |  | 1.103 |  |  |  | SM.Only.Up.12H |
| IGF2BP3 |  |  |  |  |  | 1.113 |  |  |  | SM.Only.Up.12H |
| IL17RA  |  |  |  |  |  | 1.214 |  |  |  | SM.Only.Up.12H |
| ILF2    |  |  |  |  |  | 1.309 |  |  |  | SM.Only.Up.12H |
| IMMT    |  |  |  |  |  | 1.455 |  |  |  | SM.Only.Up.12H |
| IMPDH2  |  |  |  |  |  | 1.092 |  |  |  | SM.Only.Up.12H |
| IRF1    |  |  |  |  |  | 1.302 |  |  |  | SM.Only.Up.12H |
| ITGB3   |  |  |  |  |  | 2.176 |  |  |  | SM.Only.Up.12H |
| JAGN1   |  |  |  |  |  | 1.239 |  |  |  | SM.Only.Up.12H |
| JMJD6   |  |  |  |  |  | 1.582 |  |  |  | SM.Only.Up.12H |
| JPH1    |  |  |  |  |  | 1.013 |  |  |  | SM.Only.Up.12H |
| KBTD7   |  |  |  |  |  | 1.095 |  |  |  | SM.Only.Up.12H |
| KCTD5   |  |  |  |  |  | 1.037 |  |  |  | SM.Only.Up.12H |
| KLC1    |  |  |  |  |  | 1.356 |  |  |  | SM.Only.Up.12H |
| KLF10   |  |  |  |  |  | 1.078 |  |  |  | SM.Only.Up.12H |
| KLF5    |  |  |  |  |  | 1.657 |  |  |  | SM.Only.Up.12H |
| KLHD3   |  |  |  |  |  | 1.152 |  |  |  | SM.Only.Up.12H |
| KPNA6   |  |  |  |  |  | 1.214 |  |  |  | SM.Only.Up.12H |
| LAMB3   |  |  |  |  |  | 1.38  |  |  |  | SM.Only.Up.12H |
| LARS    |  |  |  |  |  | 1.013 |  |  |  | SM.Only.Up.12H |
| LETM1   |  |  |  |  |  | 1.009 |  |  |  | SM.Only.Up.12H |
| LMBR1L  |  |  |  |  |  | 1.801 |  |  |  | SM.Only.Up.12H |
| LMNB2   |  |  |  |  |  | 1.023 |  |  |  | SM.Only.Up.12H |

|           |  |  |  |  |  |       |  |  |                |
|-----------|--|--|--|--|--|-------|--|--|----------------|
| LOC474535 |  |  |  |  |  | 1.96  |  |  | SM.Only.Up.12H |
| LOC474540 |  |  |  |  |  | 1.001 |  |  | SM.Only.Up.12H |
| LOC474543 |  |  |  |  |  | 1.139 |  |  | SM.Only.Up.12H |
| LOC474769 |  |  |  |  |  | 1.045 |  |  | SM.Only.Up.12H |
| LOC474819 |  |  |  |  |  | 1.829 |  |  | SM.Only.Up.12H |
| LOC475553 |  |  |  |  |  | 1.029 |  |  | SM.Only.Up.12H |
| LOC476056 |  |  |  |  |  | 1.264 |  |  | SM.Only.Up.12H |
| LOC476149 |  |  |  |  |  | 1.634 |  |  | SM.Only.Up.12H |
| LOC477038 |  |  |  |  |  | 1.011 |  |  | SM.Only.Up.12H |
| LOC477532 |  |  |  |  |  | 1.164 |  |  | SM.Only.Up.12H |
| LOC478087 |  |  |  |  |  | 1.377 |  |  | SM.Only.Up.12H |
| LOC478495 |  |  |  |  |  | 1.18  |  |  | SM.Only.Up.12H |
| LOC478694 |  |  |  |  |  | 1.142 |  |  | SM.Only.Up.12H |
| LOC478865 |  |  |  |  |  | 1.151 |  |  | SM.Only.Up.12H |
| LOC479205 |  |  |  |  |  | 1.009 |  |  | SM.Only.Up.12H |
| LOC479365 |  |  |  |  |  | 1.356 |  |  | SM.Only.Up.12H |
| LOC480535 |  |  |  |  |  | 2.27  |  |  | SM.Only.Up.12H |
| LOC482293 |  |  |  |  |  | 1.003 |  |  | SM.Only.Up.12H |
| LOC482428 |  |  |  |  |  | 1.313 |  |  | SM.Only.Up.12H |
| LOC482756 |  |  |  |  |  | 1.462 |  |  | SM.Only.Up.12H |
| LOC484461 |  |  |  |  |  | 1.068 |  |  | SM.Only.Up.12H |
| LOC485831 |  |  |  |  |  | 1.223 |  |  | SM.Only.Up.12H |
| LOC485858 |  |  |  |  |  | 1.532 |  |  | SM.Only.Up.12H |
| LOC486214 |  |  |  |  |  | 1.664 |  |  | SM.Only.Up.12H |
| LOC488631 |  |  |  |  |  | 1.098 |  |  | SM.Only.Up.12H |
| LOC490690 |  |  |  |  |  | 1.041 |  |  | SM.Only.Up.12H |
| LOC490810 |  |  |  |  |  | 1.105 |  |  | SM.Only.Up.12H |
| LOC492219 |  |  |  |  |  | 1.169 |  |  | SM.Only.Up.12H |
| LOC607369 |  |  |  |  |  | 1.082 |  |  | SM.Only.Up.12H |
| LOC607690 |  |  |  |  |  | 1.162 |  |  | SM.Only.Up.12H |
| LOC607889 |  |  |  |  |  | 1.084 |  |  | SM.Only.Up.12H |
| LOC607911 |  |  |  |  |  | 1.015 |  |  | SM.Only.Up.12H |
| LOC607957 |  |  |  |  |  | 1.319 |  |  | SM.Only.Up.12H |
| LOC609286 |  |  |  |  |  | 1.254 |  |  | SM.Only.Up.12H |
| LOC609339 |  |  |  |  |  | 1.853 |  |  | SM.Only.Up.12H |
| LOC609365 |  |  |  |  |  | 1.25  |  |  | SM.Only.Up.12H |
| LOC609334 |  |  |  |  |  | 1.053 |  |  | SM.Only.Up.12H |
| LOC609677 |  |  |  |  |  | 1.324 |  |  | SM.Only.Up.12H |
| LOC610012 |  |  |  |  |  | 1.116 |  |  | SM.Only.Up.12H |
| LOC610626 |  |  |  |  |  | 1.03  |  |  | SM.Only.Up.12H |
| LOC610942 |  |  |  |  |  | 1.081 |  |  | SM.Only.Up.12H |
| LOC611900 |  |  |  |  |  | 1.247 |  |  | SM.Only.Up.12H |
| LOC612537 |  |  |  |  |  | 1.3   |  |  | SM.Only.Up.12H |
| LRG1      |  |  |  |  |  | 1.175 |  |  | SM.Only.Up.12H |
| LRRC88    |  |  |  |  |  | 1.376 |  |  | SM.Only.Up.12H |
| LRRC1     |  |  |  |  |  | 1.037 |  |  | SM.Only.Up.12H |
| LSM1      |  |  |  |  |  | 1.096 |  |  | SM.Only.Up.12H |
| LSM2      |  |  |  |  |  | 1.352 |  |  | SM.Only.Up.12H |
| LSM7      |  |  |  |  |  | 1.573 |  |  | SM.Only.Up.12H |
| LTBP1     |  |  |  |  |  | 1.409 |  |  | SM.Only.Up.12H |
| LV75      |  |  |  |  |  | 1.302 |  |  | SM.Only.Up.12H |
| LYG1      |  |  |  |  |  | 1.016 |  |  | SM.Only.Up.12H |
| MAD2L1BP  |  |  |  |  |  | 1.035 |  |  | SM.Only.Up.12H |
| MAGMAS    |  |  |  |  |  | 1.006 |  |  | SM.Only.Up.12H |
| MAMLD1    |  |  |  |  |  | 1.082 |  |  | SM.Only.Up.12H |
| MAN1C1    |  |  |  |  |  | 1.188 |  |  | SM.Only.Up.12H |
| MAPK13    |  |  |  |  |  | 1.972 |  |  | SM.Only.Up.12H |
| MARK2     |  |  |  |  |  | 1.174 |  |  | SM.Only.Up.12H |
| MDN1      |  |  |  |  |  | 1.067 |  |  | SM.Only.Up.12H |
| METT10D   |  |  |  |  |  | 1.516 |  |  | SM.Only.Up.12H |
| METT13    |  |  |  |  |  | 1.18  |  |  | SM.Only.Up.12H |
| MIDN      |  |  |  |  |  | 1.427 |  |  | SM.Only.Up.12H |
| MLEC      |  |  |  |  |  | 1.147 |  |  | SM.Only.Up.12H |
| MOCOS     |  |  |  |  |  | 1.133 |  |  | SM.Only.Up.12H |
| MPHOSPH6  |  |  |  |  |  | 1.024 |  |  | SM.Only.Up.12H |
| MRRP522   |  |  |  |  |  | 1.279 |  |  | SM.Only.Up.12H |
| MRRP530   |  |  |  |  |  | 1.251 |  |  | SM.Only.Up.12H |
| NAP1L4    |  |  |  |  |  | 1.073 |  |  | SM.Only.Up.12H |
| NARS2     |  |  |  |  |  | 1.105 |  |  | SM.Only.Up.12H |
| NAT13     |  |  |  |  |  | 1.156 |  |  | SM.Only.Up.12H |
| NECAP2    |  |  |  |  |  | 1.086 |  |  | SM.Only.Up.12H |
| NETO2     |  |  |  |  |  | 1.115 |  |  | SM.Only.Up.12H |
| NFAM1     |  |  |  |  |  | 1.351 |  |  | SM.Only.Up.12H |
| NFKB2     |  |  |  |  |  | 1.644 |  |  | SM.Only.Up.12H |
| NFRBIA    |  |  |  |  |  | 1.509 |  |  | SM.Only.Up.12H |
| NFRBIB    |  |  |  |  |  | 1.335 |  |  | SM.Only.Up.12H |
| NFYA      |  |  |  |  |  | 1.204 |  |  | SM.Only.Up.12H |
| NGF       |  |  |  |  |  | 1.268 |  |  | SM.Only.Up.12H |
| NIACR1    |  |  |  |  |  | 1.789 |  |  | SM.Only.Up.12H |
| NIP7      |  |  |  |  |  | 1.062 |  |  | SM.Only.Up.12H |
| NIPAZ     |  |  |  |  |  | 1.182 |  |  | SM.Only.Up.12H |
| NOLL10    |  |  |  |  |  | 1.175 |  |  | SM.Only.Up.12H |
| NOLC1     |  |  |  |  |  | 1.122 |  |  | SM.Only.Up.12H |
| NOP16     |  |  |  |  |  | 1.244 |  |  | SM.Only.Up.12H |
| NOVA1     |  |  |  |  |  | 1.015 |  |  | SM.Only.Up.12H |
| NP        |  |  |  |  |  | 1.188 |  |  | SM.Only.Up.12H |
| NQO1      |  |  |  |  |  | 1.259 |  |  | SM.Only.Up.12H |
| NTSC3     |  |  |  |  |  | 1.038 |  |  | SM.Only.Up.12H |
| NUDT5     |  |  |  |  |  | 1.024 |  |  | SM.Only.Up.12H |
| NUDT6     |  |  |  |  |  | 1.346 |  |  | SM.Only.Up.12H |
| NUP210L   |  |  |  |  |  | 1.509 |  |  | SM.Only.Up.12H |
| OPN15W    |  |  |  |  |  | 1.228 |  |  | SM.Only.Up.12H |
| OVCA2     |  |  |  |  |  | 1.048 |  |  | SM.Only.Up.12H |
| PA2G4     |  |  |  |  |  | 1.005 |  |  | SM.Only.Up.12H |
| PAK2      |  |  |  |  |  | 1.188 |  |  | SM.Only.Up.12H |
| PDE12     |  |  |  |  |  | 1.265 |  |  | SM.Only.Up.12H |
| PDXK      |  |  |  |  |  | 1.045 |  |  | SM.Only.Up.12H |
| PFDN2     |  |  |  |  |  | 1.126 |  |  | SM.Only.Up.12H |
| PHACTR2   |  |  |  |  |  | 1.397 |  |  | SM.Only.Up.12H |
| PI15      |  |  |  |  |  | 1.147 |  |  | SM.Only.Up.12H |
| PIGV      |  |  |  |  |  | 1.031 |  |  | SM.Only.Up.12H |
| PION      |  |  |  |  |  | 1.12  |  |  | SM.Only.Up.12H |
| PIPSK1A   |  |  |  |  |  | 1.297 |  |  | SM.Only.Up.12H |
| PIR       |  |  |  |  |  | 1.053 |  |  | SM.Only.Up.12H |
| PITRM1    |  |  |  |  |  | 1.267 |  |  | SM.Only.Up.12H |
| PLA2G4E   |  |  |  |  |  | 1.429 |  |  | SM.Only.Up.12H |
| PLEKHG6   |  |  |  |  |  | 1.302 |  |  | SM.Only.Up.12H |
| PLMPC1    |  |  |  |  |  | 1.038 |  |  | SM.Only.Up.12H |
| POLR2H    |  |  |  |  |  | 1.017 |  |  | SM.Only.Up.12H |
| POLR3K    |  |  |  |  |  | 1.57  |  |  | SM.Only.Up.12H |
| PONP      |  |  |  |  |  | 1.039 |  |  | SM.Only.Up.12H |
| PPIL3     |  |  |  |  |  | 1.166 |  |  | SM.Only.Up.12H |
| PPP2R3C   |  |  |  |  |  | 1.081 |  |  | SM.Only.Up.12H |
| PPP3CB    |  |  |  |  |  | 1.618 |  |  | SM.Only.Up.12H |
| PPPDE2    |  |  |  |  |  | 1.784 |  |  | SM.Only.Up.12H |
| PPRC1     |  |  |  |  |  | 1.7   |  |  | SM.Only.Up.12H |
| PRRB      |  |  |  |  |  | 1.507 |  |  | SM.Only.Up.12H |
| PRKAR1A   |  |  |  |  |  | 1.806 |  |  | SM.Only.Up.12H |
| PRPS1     |  |  |  |  |  | 1.055 |  |  | SM.Only.Up.12H |
| PSEN1     |  |  |  |  |  | 1.132 |  |  | SM.Only.Up.12H |
| PSMB1     |  |  |  |  |  | 1.005 |  |  | SM.Only.Up.12H |
| PSMB8     |  |  |  |  |  | 1.355 |  |  | SM.Only.Up.12H |
| PSMD13    |  |  |  |  |  | 1.12  |  |  | SM.Only.Up.12H |

|           |  |  |  |  |  |       |  |  |                |
|-----------|--|--|--|--|--|-------|--|--|----------------|
| PSMD8     |  |  |  |  |  | 1.259 |  |  | SM.Only.Up.12H |
| PSME2     |  |  |  |  |  | 1.123 |  |  | SM.Only.Up.12H |
| PSME3     |  |  |  |  |  | 1.493 |  |  | SM.Only.Up.12H |
| PTGER3    |  |  |  |  |  | 1.326 |  |  | SM.Only.Up.12H |
| PTGIS     |  |  |  |  |  | 1.157 |  |  | SM.Only.Up.12H |
| PTPN9     |  |  |  |  |  | 1.27  |  |  | SM.Only.Up.12H |
| PUS1      |  |  |  |  |  | 1.292 |  |  | SM.Only.Up.12H |
| QTRT1     |  |  |  |  |  | 1.104 |  |  | SM.Only.Up.12H |
| RAB11FIP1 |  |  |  |  |  | 1.565 |  |  | SM.Only.Up.12H |
| RAB11FIP4 |  |  |  |  |  | 1.127 |  |  | SM.Only.Up.12H |
| RAB18     |  |  |  |  |  | 1.108 |  |  | SM.Only.Up.12H |
| RALBP1    |  |  |  |  |  | 1.114 |  |  | SM.Only.Up.12H |
| RANBP1    |  |  |  |  |  | 1.708 |  |  | SM.Only.Up.12H |
| RASGRP4   |  |  |  |  |  | 1.286 |  |  | SM.Only.Up.12H |
| RBM14     |  |  |  |  |  | 1.355 |  |  | SM.Only.Up.12H |
| RBM19     |  |  |  |  |  | 1.207 |  |  | SM.Only.Up.12H |
| RBM23     |  |  |  |  |  | 1.185 |  |  | SM.Only.Up.12H |
| RBM8A     |  |  |  |  |  | 1.13  |  |  | SM.Only.Up.12H |
| RCL1      |  |  |  |  |  | 1.345 |  |  | SM.Only.Up.12H |
| RFKANK    |  |  |  |  |  | 1.755 |  |  | SM.Only.Up.12H |
| RG54      |  |  |  |  |  | 2.152 |  |  | SM.Only.Up.12H |
| RHAG      |  |  |  |  |  | 1.073 |  |  | SM.Only.Up.12H |
| RNF114    |  |  |  |  |  | 1.438 |  |  | SM.Only.Up.12H |
| RNF145    |  |  |  |  |  | 1.084 |  |  | SM.Only.Up.12H |
| RNF185    |  |  |  |  |  | 1.903 |  |  | SM.Only.Up.12H |
| RNF25     |  |  |  |  |  | 1.461 |  |  | SM.Only.Up.12H |
| ROGD1     |  |  |  |  |  | 1.012 |  |  | SM.Only.Up.12H |
| ROMO1     |  |  |  |  |  | 1.269 |  |  | SM.Only.Up.12H |
| RPAP3     |  |  |  |  |  | 1.007 |  |  | SM.Only.Up.12H |
| RPIA      |  |  |  |  |  | 1.152 |  |  | SM.Only.Up.12H |
| RPL10A    |  |  |  |  |  | 1.719 |  |  | SM.Only.Up.12H |
| RPL32     |  |  |  |  |  | 1.553 |  |  | SM.Only.Up.12H |
| RPL7L1    |  |  |  |  |  | 1.087 |  |  | SM.Only.Up.12H |
| RPP14     |  |  |  |  |  | 1.027 |  |  | SM.Only.Up.12H |
| RPS12     |  |  |  |  |  | 1.433 |  |  | SM.Only.Up.12H |
| RPS19     |  |  |  |  |  | 1.111 |  |  | SM.Only.Up.12H |
| RPS19BP1  |  |  |  |  |  | 1.161 |  |  | SM.Only.Up.12H |
| RRP7A     |  |  |  |  |  | 1.737 |  |  | SM.Only.Up.12H |
| SAG       |  |  |  |  |  | 1.906 |  |  | SM.Only.Up.12H |
| SART3     |  |  |  |  |  | 1.139 |  |  | SM.Only.Up.12H |
| SEC22B    |  |  |  |  |  | 1.095 |  |  | SM.Only.Up.12H |
| SFRS7     |  |  |  |  |  | 1.172 |  |  | SM.Only.Up.12H |
| SHB       |  |  |  |  |  | 1.737 |  |  | SM.Only.Up.12H |
| SHROOM4   |  |  |  |  |  | 1.428 |  |  | SM.Only.Up.12H |
| SLC16A7   |  |  |  |  |  | 1.132 |  |  | SM.Only.Up.12H |
| SLC18A2   |  |  |  |  |  | 1.025 |  |  | SM.Only.Up.12H |
| SLC1A5    |  |  |  |  |  | 1.037 |  |  | SM.Only.Up.12H |
| SLC25A33  |  |  |  |  |  | 1.146 |  |  | SM.Only.Up.12H |
| SLC26A8   |  |  |  |  |  | 1.549 |  |  | SM.Only.Up.12H |
| SLC30A7   |  |  |  |  |  | 1.245 |  |  | SM.Only.Up.12H |
| SLC36A4   |  |  |  |  |  | 1.006 |  |  | SM.Only.Up.12H |
| SLC37A3   |  |  |  |  |  | 1.267 |  |  | SM.Only.Up.12H |
| SLC38A5   |  |  |  |  |  | 1.574 |  |  | SM.Only.Up.12H |
| SLC6A14   |  |  |  |  |  | 2.331 |  |  | SM.Only.Up.12H |
| SLC9A6    |  |  |  |  |  | 1.403 |  |  | SM.Only.Up.12H |
| SMN       |  |  |  |  |  | 1.092 |  |  | SM.Only.Up.12H |
| SMD5      |  |  |  |  |  | 1.209 |  |  | SM.Only.Up.12H |
| SNRPC     |  |  |  |  |  | 1.351 |  |  | SM.Only.Up.12H |
| SNRPD2    |  |  |  |  |  | 1.036 |  |  | SM.Only.Up.12H |
| SOD2      |  |  |  |  |  | 1.807 |  |  | SM.Only.Up.12H |
| SPAG17    |  |  |  |  |  | 1.414 |  |  | SM.Only.Up.12H |
| SPATA2    |  |  |  |  |  | 1.427 |  |  | SM.Only.Up.12H |
| SPP2      |  |  |  |  |  | 1.659 |  |  | SM.Only.Up.12H |
| SPTLC2    |  |  |  |  |  | 1.289 |  |  | SM.Only.Up.12H |
| SFRP1     |  |  |  |  |  | 1.088 |  |  | SM.Only.Up.12H |
| SRPR      |  |  |  |  |  | 1.203 |  |  | SM.Only.Up.12H |
| SRR       |  |  |  |  |  | 1.204 |  |  | SM.Only.Up.12H |
| SRRF      |  |  |  |  |  | 1.006 |  |  | SM.Only.Up.12H |
| STARD3    |  |  |  |  |  | 1.047 |  |  | SM.Only.Up.12H |
| STX11     |  |  |  |  |  | 1.165 |  |  | SM.Only.Up.12H |
| STX12     |  |  |  |  |  | 1.118 |  |  | SM.Only.Up.12H |
| SUPV3L1   |  |  |  |  |  | 1.104 |  |  | SM.Only.Up.12H |
| SYCP2     |  |  |  |  |  | 1.485 |  |  | SM.Only.Up.12H |
| SYNCRIP   |  |  |  |  |  | 1.069 |  |  | SM.Only.Up.12H |
| SYT17     |  |  |  |  |  | 1.073 |  |  | SM.Only.Up.12H |
| TAF10     |  |  |  |  |  | 1.03  |  |  | SM.Only.Up.12H |
| TAF4B     |  |  |  |  |  | 1.003 |  |  | SM.Only.Up.12H |
| TAGLN2    |  |  |  |  |  | 1.258 |  |  | SM.Only.Up.12H |
| TBC1D13   |  |  |  |  |  | 1.191 |  |  | SM.Only.Up.12H |
| TBC1D9    |  |  |  |  |  | 1.04  |  |  | SM.Only.Up.12H |
| TCEB1     |  |  |  |  |  | 1.085 |  |  | SM.Only.Up.12H |
| TCEB3     |  |  |  |  |  | 1.173 |  |  | SM.Only.Up.12H |
| TEAD4     |  |  |  |  |  | 1.825 |  |  | SM.Only.Up.12H |
| TEX28     |  |  |  |  |  | 1.729 |  |  | SM.Only.Up.12H |
| THAP5     |  |  |  |  |  | 1.479 |  |  | SM.Only.Up.12H |
| TIMM17A   |  |  |  |  |  | 1.333 |  |  | SM.Only.Up.12H |
| TIMM50    |  |  |  |  |  | 1     |  |  | SM.Only.Up.12H |
| TKT       |  |  |  |  |  | 1.44  |  |  | SM.Only.Up.12H |
| TMBIM1    |  |  |  |  |  | 1.106 |  |  | SM.Only.Up.12H |
| TMEM167A  |  |  |  |  |  | 1.002 |  |  | SM.Only.Up.12H |
| TMEM30C   |  |  |  |  |  | 1.24  |  |  | SM.Only.Up.12H |
| TMEM33    |  |  |  |  |  | 1.275 |  |  | SM.Only.Up.12H |
| TNFRSF21  |  |  |  |  |  | 1.122 |  |  | SM.Only.Up.12H |
| TNFRSF25  |  |  |  |  |  | 1.13  |  |  | SM.Only.Up.12H |
| TOMM40    |  |  |  |  |  | 1.143 |  |  | SM.Only.Up.12H |
| TOMM5     |  |  |  |  |  | 1.251 |  |  | SM.Only.Up.12H |
| TOP1      |  |  |  |  |  | 1.445 |  |  | SM.Only.Up.12H |
| TPST2     |  |  |  |  |  | 1.488 |  |  | SM.Only.Up.12H |
| TRIM26    |  |  |  |  |  | 1.35  |  |  | SM.Only.Up.12H |
| TRIOBP    |  |  |  |  |  | 1.788 |  |  | SM.Only.Up.12H |
| TRMT112   |  |  |  |  |  | 1.057 |  |  | SM.Only.Up.12H |
| TRMT12    |  |  |  |  |  | 1.082 |  |  | SM.Only.Up.12H |
| TSHZ2     |  |  |  |  |  | 1.503 |  |  | SM.Only.Up.12H |
| TSPAN15   |  |  |  |  |  | 1.523 |  |  | SM.Only.Up.12H |
| TWISTNB   |  |  |  |  |  | 1.29  |  |  | SM.Only.Up.12H |
| TXNDC9    |  |  |  |  |  | 1.429 |  |  | SM.Only.Up.12H |
| UBA2      |  |  |  |  |  | 1.351 |  |  | SM.Only.Up.12H |
| UBE2N     |  |  |  |  |  | 1.107 |  |  | SM.Only.Up.12H |
| UBR2      |  |  |  |  |  | 1.345 |  |  | SM.Only.Up.12H |
| UCHL3     |  |  |  |  |  | 1.007 |  |  | SM.Only.Up.12H |
| UFW1      |  |  |  |  |  | 1.042 |  |  | SM.Only.Up.12H |
| UGCG      |  |  |  |  |  | 1.56  |  |  | SM.Only.Up.12H |
| UMPS      |  |  |  |  |  | 1.274 |  |  | SM.Only.Up.12H |
| USP32     |  |  |  |  |  | 1.024 |  |  | SM.Only.Up.12H |
| USP38     |  |  |  |  |  | 1.04  |  |  | SM.Only.Up.12H |
| USP48     |  |  |  |  |  | 1.008 |  |  | SM.Only.Up.12H |
| UTP14A    |  |  |  |  |  | 1.371 |  |  | SM.Only.Up.12H |
| UTP15     |  |  |  |  |  | 1.294 |  |  | SM.Only.Up.12H |
| UTP20     |  |  |  |  |  | 1.13  |  |  | SM.Only.Up.12H |
| UTP3      |  |  |  |  |  | 1.205 |  |  | SM.Only.Up.12H |
| WDR24     |  |  |  |  |  | 1.162 |  |  | SM.Only.Up.12H |
| XRCC5     |  |  |  |  |  | 1.168 |  |  | SM.Only.Up.12H |
| YEATS2    |  |  |  |  |  | 1.043 |  |  | SM.Only.Up.12H |

|           |  |  |  |       |       |       |  |                |
|-----------|--|--|--|-------|-------|-------|--|----------------|
| YWHAG     |  |  |  |       | 1.137 |       |  | SM.Only.Up.12H |
| ZC3H12C   |  |  |  |       | 1.059 |       |  | SM.Only.Up.12H |
| ZDHHC23   |  |  |  |       | 1.232 |       |  | SM.Only.Up.12H |
| ZDHHC9    |  |  |  |       | 1.056 |       |  | SM.Only.Up.12H |
| ZFAND5    |  |  |  |       | 1.014 |       |  | SM.Only.Up.12H |
| ZFHX2     |  |  |  |       | 1.208 |       |  | SM.Only.Up.12H |
| ZNF41     |  |  |  |       | 1.445 |       |  | SM.Only.Up.12H |
| ZNF462    |  |  |  |       | 1.223 |       |  | SM.Only.Up.12H |
| ZNF684    |  |  |  |       | 1.033 |       |  | SM.Only.Up.12H |
| ZNHIT6    |  |  |  |       | 1.402 |       |  | SM.Only.Up.12H |
| ZSWIM6    |  |  |  |       | 1.008 |       |  | SM.Only.Up.12H |
| ZZZ3      |  |  |  |       | 1.069 |       |  | SM.Only.Up.12H |
| AIF1L     |  |  |  |       |       | 1.236 |  | SM.Only.Up.24H |
| ARL6IP6   |  |  |  |       |       | 1.507 |  | SM.Only.Up.24H |
| CEP76     |  |  |  |       |       | 2.278 |  | SM.Only.Up.24H |
| DET1      |  |  |  |       |       | 1.405 |  | SM.Only.Up.24H |
| EDC3      |  |  |  |       |       | 1.469 |  | SM.Only.Up.24H |
| ELOVL6    |  |  |  |       |       | 1.686 |  | SM.Only.Up.24H |
| FLOT2     |  |  |  |       |       | 1.776 |  | SM.Only.Up.24H |
| LOC61949  |  |  |  |       |       | 1.592 |  | SM.Only.Up.24H |
| LRP8      |  |  |  |       |       | 1.387 |  | SM.Only.Up.24H |
| MAEL      |  |  |  |       |       | 1.469 |  | SM.Only.Up.24H |
| MRPS33    |  |  |  |       |       | 1.483 |  | SM.Only.Up.24H |
| PKIA      |  |  |  |       |       | 2.048 |  | SM.Only.Up.24H |
| POP5      |  |  |  |       |       | 1.596 |  | SM.Only.Up.24H |
| RIMS1     |  |  |  |       |       | 1.689 |  | SM.Only.Up.24H |
| SRGAP1    |  |  |  |       |       | 2.165 |  | SM.Only.Up.24H |
| SYT16     |  |  |  |       |       | 1.636 |  | SM.Only.Up.24H |
| USP50     |  |  |  |       |       | 1.582 |  | SM.Only.Up.24H |
| XPO4      |  |  |  |       |       | 2.378 |  | SM.Only.Up.24H |
| ABRA      |  |  |  | 2.859 |       |       |  | SM.Only.Up.2H  |
| LMCD1     |  |  |  | 2.419 |       |       |  | SM.Only.Up.2H  |
| LOC481896 |  |  |  | 1.82  |       |       |  | SM.Only.Up.2H  |
| SAMD4A    |  |  |  | 1.397 |       |       |  | SM.Only.Up.2H  |
| 15-Sep    |  |  |  |       |       |       |  |                |
| ABHD3     |  |  |  |       |       | 1.142 |  | SM.Only.Up.7D  |
| ACTN1     |  |  |  |       |       | 1.38  |  | SM.Only.Up.7D  |
| ADAMTS12  |  |  |  |       |       | 1.222 |  | SM.Only.Up.7D  |
| ADCY7     |  |  |  |       |       | 1.87  |  | SM.Only.Up.7D  |
| ADIPOR2   |  |  |  |       |       | 1.254 |  | SM.Only.Up.7D  |
| ADIPOR2   |  |  |  |       |       | 1.118 |  | SM.Only.Up.7D  |
| AP3B1     |  |  |  |       |       | 1.053 |  | SM.Only.Up.7D  |
| ARL1      |  |  |  |       |       | 1.042 |  | SM.Only.Up.7D  |
| ARL6IP5   |  |  |  |       |       | 1.056 |  | SM.Only.Up.7D  |
| ARPC1A    |  |  |  |       |       | 1.05  |  | SM.Only.Up.7D  |
| ATPEV1H   |  |  |  |       |       | 1.049 |  | SM.Only.Up.7D  |
| AUTS2     |  |  |  |       |       | 1.183 |  | SM.Only.Up.7D  |
| B3GALT1   |  |  |  |       |       | 1.105 |  | SM.Only.Up.7D  |
| B4GALT1   |  |  |  |       |       | 1.202 |  | SM.Only.Up.7D  |
| BACE2     |  |  |  |       |       | 1.411 |  | SM.Only.Up.7D  |
| BARD1     |  |  |  |       |       | 1.137 |  | SM.Only.Up.7D  |
| BCL2L11   |  |  |  |       |       | 1.326 |  | SM.Only.Up.7D  |
| BGN       |  |  |  |       |       | 1.317 |  | SM.Only.Up.7D  |
| BIC11     |  |  |  |       |       | 1.449 |  | SM.Only.Up.7D  |
| BID       |  |  |  |       |       | 1.105 |  | SM.Only.Up.7D  |
| BTG3      |  |  |  |       |       | 1.036 |  | SM.Only.Up.7D  |
| CIQTNF3   |  |  |  |       |       | 3.241 |  | SM.Only.Up.7D  |
| CALU      |  |  |  |       |       | 1.277 |  | SM.Only.Up.7D  |
| CASP3     |  |  |  |       |       | 1.24  |  | SM.Only.Up.7D  |
| CCDC109B  |  |  |  |       |       | 1.742 |  | SM.Only.Up.7D  |
| CCDC9     |  |  |  |       |       | 1.456 |  | SM.Only.Up.7D  |
| CCM2      |  |  |  |       |       | 1.466 |  | SM.Only.Up.7D  |
| CCNG1     |  |  |  |       |       | 1.091 |  | SM.Only.Up.7D  |
| CDCA7L    |  |  |  |       |       | 1.327 |  | SM.Only.Up.7D  |
| CDH11     |  |  |  |       |       | 1.909 |  | SM.Only.Up.7D  |
| CENPC1    |  |  |  |       |       | 1.131 |  | SM.Only.Up.7D  |
| CEP350    |  |  |  |       |       | 1.064 |  | SM.Only.Up.7D  |
| CERCAM    |  |  |  |       |       | 1.791 |  | SM.Only.Up.7D  |
| CHD4      |  |  |  |       |       | 1.074 |  | SM.Only.Up.7D  |
| CHFR      |  |  |  |       |       | 1.544 |  | SM.Only.Up.7D  |
| CLIC2     |  |  |  |       |       | 2.321 |  | SM.Only.Up.7D  |
| cln5      |  |  |  |       |       | 1.002 |  | SM.Only.Up.7D  |
| CLU       |  |  |  |       |       | 1.839 |  | SM.Only.Up.7D  |
| COG5      |  |  |  |       |       | 1.044 |  | SM.Only.Up.7D  |
| COL10A1   |  |  |  |       |       | 1.467 |  | SM.Only.Up.7D  |
| COL12A1   |  |  |  |       |       | 1.992 |  | SM.Only.Up.7D  |
| COPA      |  |  |  |       |       | 1.047 |  | SM.Only.Up.7D  |
| COPB1     |  |  |  |       |       | 1.042 |  | SM.Only.Up.7D  |
| COPB2     |  |  |  |       |       | 1.295 |  | SM.Only.Up.7D  |
| cOR9K3    |  |  |  |       |       | 1.1   |  | SM.Only.Up.7D  |
| CPD       |  |  |  |       |       | 1.107 |  | SM.Only.Up.7D  |
| CPNE8     |  |  |  |       |       | 1.743 |  | SM.Only.Up.7D  |
| CPT2      |  |  |  |       |       | 1.15  |  | SM.Only.Up.7D  |
| CPZ       |  |  |  |       |       | 1.211 |  | SM.Only.Up.7D  |
| CRIS3L1   |  |  |  |       |       | 1.841 |  | SM.Only.Up.7D  |
| CSRP1     |  |  |  |       |       | 1.048 |  | SM.Only.Up.7D  |
| DEGS1     |  |  |  |       |       | 1.055 |  | SM.Only.Up.7D  |
| DERL2     |  |  |  |       |       | 1.1   |  | SM.Only.Up.7D  |
| DIS3L     |  |  |  |       |       | 1.061 |  | SM.Only.Up.7D  |
| DNAJC10   |  |  |  |       |       | 1.027 |  | SM.Only.Up.7D  |
| DNAJC15   |  |  |  |       |       | 1.04  |  | SM.Only.Up.7D  |
| DNMT1     |  |  |  |       |       | 1.089 |  | SM.Only.Up.7D  |
| DOCCK4    |  |  |  |       |       | 1.214 |  | SM.Only.Up.7D  |
| DRAM2     |  |  |  |       |       | 1.082 |  | SM.Only.Up.7D  |
| DTT       |  |  |  |       |       | 2.408 |  | SM.Only.Up.7D  |
| DTX3L     |  |  |  |       |       | 1.241 |  | SM.Only.Up.7D  |
| EDIL3     |  |  |  |       |       | 2.031 |  | SM.Only.Up.7D  |
| EFCAB10   |  |  |  |       |       | 1.201 |  | SM.Only.Up.7D  |
| EIF2AK2   |  |  |  |       |       | 1.238 |  | SM.Only.Up.7D  |
| ENPP1     |  |  |  |       |       | 2.19  |  | SM.Only.Up.7D  |
| ERBB2IP   |  |  |  |       |       | 1.11  |  | SM.Only.Up.7D  |
| ETV1      |  |  |  |       |       | 1.109 |  | SM.Only.Up.7D  |
| EXT2      |  |  |  |       |       | 1.234 |  | SM.Only.Up.7D  |
| FANCD2    |  |  |  |       |       | 2.106 |  | SM.Only.Up.7D  |
| FASTKD3   |  |  |  |       |       | 1.356 |  | SM.Only.Up.7D  |
| FBXO18    |  |  |  |       |       | 1.079 |  | SM.Only.Up.7D  |
| FGFR1OP   |  |  |  |       |       | 1.153 |  | SM.Only.Up.7D  |
| FIBCD1    |  |  |  |       |       | 1.113 |  | SM.Only.Up.7D  |
| FKBP1A    |  |  |  |       |       | 1.017 |  | SM.Only.Up.7D  |
| FKBP3     |  |  |  |       |       | 1.076 |  | SM.Only.Up.7D  |
| FMNL3     |  |  |  |       |       | 1.133 |  | SM.Only.Up.7D  |
| FNBP1L    |  |  |  |       |       | 1.282 |  | SM.Only.Up.7D  |
| FUCA1     |  |  |  |       |       | 1.731 |  | SM.Only.Up.7D  |
| FUT11     |  |  |  |       |       | 1.303 |  | SM.Only.Up.7D  |
| GALNT7    |  |  |  |       |       | 1.063 |  | SM.Only.Up.7D  |
| GGCK      |  |  |  |       |       | 1.264 |  | SM.Only.Up.7D  |
| GNNIN     |  |  |  |       |       | 1.172 |  | SM.Only.Up.7D  |
| GNNMT     |  |  |  |       |       | 1.134 |  | SM.Only.Up.7D  |
| GOLM1     |  |  |  |       |       | 1.17  |  | SM.Only.Up.7D  |
| GOLT1B    |  |  |  |       |       | 1.01  |  | SM.Only.Up.7D  |
| GPR180    |  |  |  |       |       | 1.148 |  | SM.Only.Up.7D  |
| HEATR5A   |  |  |  |       |       | 1.277 |  | SM.Only.Up.7D  |
| HERC5     |  |  |  |       |       | 3.2   |  | SM.Only.Up.7D  |
| HHAT      |  |  |  |       |       | 1.398 |  | SM.Only.Up.7D  |

|           |  |  |  |  |  |  |  |  |       |               |
|-----------|--|--|--|--|--|--|--|--|-------|---------------|
| HMGCS1    |  |  |  |  |  |  |  |  | 1.081 | SM.Only.Up.7D |
| HTR28     |  |  |  |  |  |  |  |  | 1.609 | SM.Only.Up.7D |
| HYAL1     |  |  |  |  |  |  |  |  | 1.877 | SM.Only.Up.7D |
| IAR1      |  |  |  |  |  |  |  |  | 1.127 | SM.Only.Up.7D |
| ICMT      |  |  |  |  |  |  |  |  | 1.754 | SM.Only.Up.7D |
| IFIT1     |  |  |  |  |  |  |  |  | 3.238 | SM.Only.Up.7D |
| IFT74     |  |  |  |  |  |  |  |  | 1.095 | SM.Only.Up.7D |
| IFT80     |  |  |  |  |  |  |  |  | 1.685 | SM.Only.Up.7D |
| IRAK4     |  |  |  |  |  |  |  |  | 1.457 | SM.Only.Up.7D |
| IREB2     |  |  |  |  |  |  |  |  | 1.009 | SM.Only.Up.7D |
| IRF9      |  |  |  |  |  |  |  |  | 1.578 | SM.Only.Up.7D |
| ITGA6     |  |  |  |  |  |  |  |  | 1.217 | SM.Only.Up.7D |
| K-RAS     |  |  |  |  |  |  |  |  | 1.138 | SM.Only.Up.7D |
| KRCC1     |  |  |  |  |  |  |  |  | 1.263 | SM.Only.Up.7D |
| KRT7      |  |  |  |  |  |  |  |  | 1.318 | SM.Only.Up.7D |
| LEPREL2   |  |  |  |  |  |  |  |  | 1.384 | SM.Only.Up.7D |
| LOC474866 |  |  |  |  |  |  |  |  | 1.289 | SM.Only.Up.7D |
| LOC475374 |  |  |  |  |  |  |  |  | 1.44  | SM.Only.Up.7D |
| LOC475708 |  |  |  |  |  |  |  |  | 3.089 | SM.Only.Up.7D |
| LOC475202 |  |  |  |  |  |  |  |  | 1.198 | SM.Only.Up.7D |
| LOC47808  |  |  |  |  |  |  |  |  | 1.413 | SM.Only.Up.7D |
| LOC478059 |  |  |  |  |  |  |  |  | 1.112 | SM.Only.Up.7D |
| LOC478554 |  |  |  |  |  |  |  |  | 1.486 | SM.Only.Up.7D |
| LOC478738 |  |  |  |  |  |  |  |  | 1.149 | SM.Only.Up.7D |
| LOC478809 |  |  |  |  |  |  |  |  | 1.076 | SM.Only.Up.7D |
| LOC479057 |  |  |  |  |  |  |  |  | 1.251 | SM.Only.Up.7D |
| LOC479179 |  |  |  |  |  |  |  |  | 1.093 | SM.Only.Up.7D |
| LOC479283 |  |  |  |  |  |  |  |  | 1.06  | SM.Only.Up.7D |
| LOC479636 |  |  |  |  |  |  |  |  | 1.077 | SM.Only.Up.7D |
| LOC479777 |  |  |  |  |  |  |  |  | 1.154 | SM.Only.Up.7D |
| LOC480336 |  |  |  |  |  |  |  |  | 1.94  | SM.Only.Up.7D |
| LOC480340 |  |  |  |  |  |  |  |  | 1.565 | SM.Only.Up.7D |
| LOC480791 |  |  |  |  |  |  |  |  | 1.141 | SM.Only.Up.7D |
| LOC481273 |  |  |  |  |  |  |  |  | 1.11  | SM.Only.Up.7D |
| LOC482619 |  |  |  |  |  |  |  |  | 1.22  | SM.Only.Up.7D |
| LOC484759 |  |  |  |  |  |  |  |  | 1.149 | SM.Only.Up.7D |
| LOC487760 |  |  |  |  |  |  |  |  | 1.48  | SM.Only.Up.7D |
| LOC489294 |  |  |  |  |  |  |  |  | 1.21  | SM.Only.Up.7D |
| LOC492149 |  |  |  |  |  |  |  |  | 1.003 | SM.Only.Up.7D |
| LOC607009 |  |  |  |  |  |  |  |  | 1.232 | SM.Only.Up.7D |
| LOC607494 |  |  |  |  |  |  |  |  | 1.208 | SM.Only.Up.7D |
| LOC608303 |  |  |  |  |  |  |  |  | 1.848 | SM.Only.Up.7D |
| LOC608438 |  |  |  |  |  |  |  |  | 2.756 | SM.Only.Up.7D |
| LOC608808 |  |  |  |  |  |  |  |  | 1.007 | SM.Only.Up.7D |
| LOC608999 |  |  |  |  |  |  |  |  | 1.04  | SM.Only.Up.7D |
| LOC609430 |  |  |  |  |  |  |  |  | 1.099 | SM.Only.Up.7D |
| LOC609700 |  |  |  |  |  |  |  |  | 2.376 | SM.Only.Up.7D |
| LOC610209 |  |  |  |  |  |  |  |  | 1.047 | SM.Only.Up.7D |
| LOC610238 |  |  |  |  |  |  |  |  | 1.322 | SM.Only.Up.7D |
| LOC610249 |  |  |  |  |  |  |  |  | 1.051 | SM.Only.Up.7D |
| LOC610815 |  |  |  |  |  |  |  |  | 2.699 | SM.Only.Up.7D |
| LOC611775 |  |  |  |  |  |  |  |  | 1.909 | SM.Only.Up.7D |
| LOC612621 |  |  |  |  |  |  |  |  | 2.096 | SM.Only.Up.7D |
| LOC612917 |  |  |  |  |  |  |  |  | 2.201 | SM.Only.Up.7D |
| LOC613008 |  |  |  |  |  |  |  |  | 1.088 | SM.Only.Up.7D |
| LRRTM2    |  |  |  |  |  |  |  |  | 1.105 | SM.Only.Up.7D |
| MAGED1    |  |  |  |  |  |  |  |  | 1.576 | SM.Only.Up.7D |
| MAGED2    |  |  |  |  |  |  |  |  | 1.132 | SM.Only.Up.7D |
| MALT1     |  |  |  |  |  |  |  |  | 1.357 | SM.Only.Up.7D |
| MANBA     |  |  |  |  |  |  |  |  | 2.011 | SM.Only.Up.7D |
| MDM1      |  |  |  |  |  |  |  |  | 1.065 | SM.Only.Up.7D |
| METTL2B   |  |  |  |  |  |  |  |  | 1.113 | SM.Only.Up.7D |
| MFSD5     |  |  |  |  |  |  |  |  | 1.065 | SM.Only.Up.7D |
| MGAT2     |  |  |  |  |  |  |  |  | 1.331 | SM.Only.Up.7D |
| MGAT5     |  |  |  |  |  |  |  |  | 1.264 | SM.Only.Up.7D |
| MPP4      |  |  |  |  |  |  |  |  | 1.981 | SM.Only.Up.7D |
| MRAP2     |  |  |  |  |  |  |  |  | 1.802 | SM.Only.Up.7D |
| MVP       |  |  |  |  |  |  |  |  | 1.345 | SM.Only.Up.7D |
| MYCBP     |  |  |  |  |  |  |  |  | 1.048 | SM.Only.Up.7D |
| MYH9      |  |  |  |  |  |  |  |  | 1.319 | SM.Only.Up.7D |
| MYL1      |  |  |  |  |  |  |  |  | 1.729 | SM.Only.Up.7D |
| MYO1E     |  |  |  |  |  |  |  |  | 1.011 | SM.Only.Up.7D |
| N4BP2     |  |  |  |  |  |  |  |  | 1.497 | SM.Only.Up.7D |
| NEIL3     |  |  |  |  |  |  |  |  | 1.734 | SM.Only.Up.7D |
| NMB       |  |  |  |  |  |  |  |  | 1.118 | SM.Only.Up.7D |
| NM5       |  |  |  |  |  |  |  |  | 1.567 | SM.Only.Up.7D |
| NPL       |  |  |  |  |  |  |  |  | 1.203 | SM.Only.Up.7D |
| NSUN4     |  |  |  |  |  |  |  |  | 1.472 | SM.Only.Up.7D |
| NSUN7     |  |  |  |  |  |  |  |  | 1.556 | SM.Only.Up.7D |
| NTSDC1    |  |  |  |  |  |  |  |  | 1.116 | SM.Only.Up.7D |
| NUDT12    |  |  |  |  |  |  |  |  | 1.039 | SM.Only.Up.7D |
| NUP43     |  |  |  |  |  |  |  |  | 1.25  | SM.Only.Up.7D |
| OPA1      |  |  |  |  |  |  |  |  | 1.52  | SM.Only.Up.7D |
| PARP51    |  |  |  |  |  |  |  |  | 1.351 | SM.Only.Up.7D |
| PARP11    |  |  |  |  |  |  |  |  | 1.023 | SM.Only.Up.7D |
| PARP14    |  |  |  |  |  |  |  |  | 2.535 | SM.Only.Up.7D |
| PARP9     |  |  |  |  |  |  |  |  | 1.91  | SM.Only.Up.7D |
| PCTK1     |  |  |  |  |  |  |  |  | 1.139 | SM.Only.Up.7D |
| PGM3      |  |  |  |  |  |  |  |  | 1.179 | SM.Only.Up.7D |
| PHFSA     |  |  |  |  |  |  |  |  | 1.138 | SM.Only.Up.7D |
| POLE2     |  |  |  |  |  |  |  |  | 1.382 | SM.Only.Up.7D |
| POLH      |  |  |  |  |  |  |  |  | 1.28  | SM.Only.Up.7D |
| PPL5      |  |  |  |  |  |  |  |  | 1.211 | SM.Only.Up.7D |
| PRCP      |  |  |  |  |  |  |  |  | 1.472 | SM.Only.Up.7D |
| PRDM15    |  |  |  |  |  |  |  |  | 1.513 | SM.Only.Up.7D |
| PRDX4     |  |  |  |  |  |  |  |  | 1.567 | SM.Only.Up.7D |
| PRKD1     |  |  |  |  |  |  |  |  | 1.273 | SM.Only.Up.7D |
| PSMB9     |  |  |  |  |  |  |  |  | 1.329 | SM.Only.Up.7D |
| PSPH      |  |  |  |  |  |  |  |  | 1.113 | SM.Only.Up.7D |
| PTPN12    |  |  |  |  |  |  |  |  | 1.18  | SM.Only.Up.7D |
| PTPRG     |  |  |  |  |  |  |  |  | 1.63  | SM.Only.Up.7D |
| PXK       |  |  |  |  |  |  |  |  | 1.607 | SM.Only.Up.7D |
| RAB31     |  |  |  |  |  |  |  |  | 1.157 | SM.Only.Up.7D |
| RANBP3    |  |  |  |  |  |  |  |  | 1.36  | SM.Only.Up.7D |
| RARA      |  |  |  |  |  |  |  |  | 1.755 | SM.Only.Up.7D |
| RBBP8     |  |  |  |  |  |  |  |  | 1.057 | SM.Only.Up.7D |
| RCN2      |  |  |  |  |  |  |  |  | 1.076 | SM.Only.Up.7D |
| RHOB2     |  |  |  |  |  |  |  |  | 1.617 | SM.Only.Up.7D |
| RHOB1B1   |  |  |  |  |  |  |  |  | 1.972 | SM.Only.Up.7D |
| RHOJ      |  |  |  |  |  |  |  |  | 1.575 | SM.Only.Up.7D |
| RNF213    |  |  |  |  |  |  |  |  | 2.17  | SM.Only.Up.7D |
| ROBO1     |  |  |  |  |  |  |  |  | 1.583 | SM.Only.Up.7D |
| ROD1      |  |  |  |  |  |  |  |  | 1.433 | SM.Only.Up.7D |
| RPGRIP1L  |  |  |  |  |  |  |  |  | 1.53  | SM.Only.Up.7D |
| RPN1      |  |  |  |  |  |  |  |  | 1.256 | SM.Only.Up.7D |
| RYK       |  |  |  |  |  |  |  |  | 1.082 | SM.Only.Up.7D |
| SALL1     |  |  |  |  |  |  |  |  | 1.282 | SM.Only.Up.7D |
| SAMD9L    |  |  |  |  |  |  |  |  | 2.747 | SM.Only.Up.7D |
| SAP30     |  |  |  |  |  |  |  |  | 1.041 | SM.Only.Up.7D |
| SAR1A     |  |  |  |  |  |  |  |  | 1.09  | SM.Only.Up.7D |
| SCARB1    |  |  |  |  |  |  |  |  | 1.799 | SM.Only.Up.7D |
| SCLT1     |  |  |  |  |  |  |  |  | 1.148 | SM.Only.Up.7D |
| SIX4      |  |  |  |  |  |  |  |  | 1.748 | SM.Only.Up.7D |

|          |  |  |  |  |  |  |  |  |       |               |
|----------|--|--|--|--|--|--|--|--|-------|---------------|
| SLBP     |  |  |  |  |  |  |  |  | 1.231 | SM.Only.Up.7D |
| SLC15A2  |  |  |  |  |  |  |  |  | 1.224 | SM.Only.Up.7D |
| SLC1A4   |  |  |  |  |  |  |  |  | 1.719 | SM.Only.Up.7D |
| SLC25A44 |  |  |  |  |  |  |  |  | 1.096 | SM.Only.Up.7D |
| SLC30A8  |  |  |  |  |  |  |  |  | 1.431 | SM.Only.Up.7D |
| SLC35A3  |  |  |  |  |  |  |  |  | 1.325 | SM.Only.Up.7D |
| SLC35F2  |  |  |  |  |  |  |  |  | 1.009 | SM.Only.Up.7D |
| SMC2     |  |  |  |  |  |  |  |  | 1.931 | SM.Only.Up.7D |
| SMC6     |  |  |  |  |  |  |  |  | 1.17  | SM.Only.Up.7D |
| SNX24    |  |  |  |  |  |  |  |  | 1.163 | SM.Only.Up.7D |
| SNX29    |  |  |  |  |  |  |  |  | 1.32  | SM.Only.Up.7D |
| SNK7     |  |  |  |  |  |  |  |  | 1.616 | SM.Only.Up.7D |
| SPATA17  |  |  |  |  |  |  |  |  | 1.389 | SM.Only.Up.7D |
| SRP54    |  |  |  |  |  |  |  |  | 1.03  | SM.Only.Up.7D |
| SRP9     |  |  |  |  |  |  |  |  | 1.024 | SM.Only.Up.7D |
| SS18     |  |  |  |  |  |  |  |  | 1.112 | SM.Only.Up.7D |
| STAT2    |  |  |  |  |  |  |  |  | 1.462 | SM.Only.Up.7D |
| TAC1     |  |  |  |  |  |  |  |  | 1.152 | SM.Only.Up.7D |
| TBC1D8B  |  |  |  |  |  |  |  |  | 1.49  | SM.Only.Up.7D |
| THBS2    |  |  |  |  |  |  |  |  | 5.074 | SM.Only.Up.7D |
| TMEM106C |  |  |  |  |  |  |  |  | 1.286 | SM.Only.Up.7D |
| TMEM107  |  |  |  |  |  |  |  |  | 1.137 | SM.Only.Up.7D |
| TMEM194B |  |  |  |  |  |  |  |  | 1.366 | SM.Only.Up.7D |
| TMEM30A  |  |  |  |  |  |  |  |  | 1.049 | SM.Only.Up.7D |
| TMEM45A  |  |  |  |  |  |  |  |  | 1.081 | SM.Only.Up.7D |
| TMPO     |  |  |  |  |  |  |  |  | 1.222 | SM.Only.Up.7D |
| TOR1B    |  |  |  |  |  |  |  |  | 1.078 | SM.Only.Up.7D |
| TPST1    |  |  |  |  |  |  |  |  | 1.512 | SM.Only.Up.7D |
| TRPS1    |  |  |  |  |  |  |  |  | 1.124 | SM.Only.Up.7D |
| TSPAN17  |  |  |  |  |  |  |  |  | 1.674 | SM.Only.Up.7D |
| TST      |  |  |  |  |  |  |  |  | 2.286 | SM.Only.Up.7D |
| TUBA1C   |  |  |  |  |  |  |  |  | 1.929 | SM.Only.Up.7D |
| TUBA3D   |  |  |  |  |  |  |  |  | 2.63  | SM.Only.Up.7D |
| TUBD1    |  |  |  |  |  |  |  |  | 2.033 | SM.Only.Up.7D |
| UBA7     |  |  |  |  |  |  |  |  | 1.35  | SM.Only.Up.7D |
| UBAC2    |  |  |  |  |  |  |  |  | 1.062 | SM.Only.Up.7D |
| UBR7     |  |  |  |  |  |  |  |  | 1.936 | SM.Only.Up.7D |
| UCHL1    |  |  |  |  |  |  |  |  | 1.286 | SM.Only.Up.7D |
| UHMK1    |  |  |  |  |  |  |  |  | 1.602 | SM.Only.Up.7D |
| UHRF1BP1 |  |  |  |  |  |  |  |  | 1.563 | SM.Only.Up.7D |
| UHRF2    |  |  |  |  |  |  |  |  | 1.206 | SM.Only.Up.7D |
| USP18    |  |  |  |  |  |  |  |  | 1.869 | SM.Only.Up.7D |
| VKORC1   |  |  |  |  |  |  |  |  | 1.021 | SM.Only.Up.7D |
| WIP1     |  |  |  |  |  |  |  |  | 1.563 | SM.Only.Up.7D |
| WSB1     |  |  |  |  |  |  |  |  | 1.286 | SM.Only.Up.7D |
| XPOT     |  |  |  |  |  |  |  |  | 1.061 | SM.Only.Up.7D |
| YES1     |  |  |  |  |  |  |  |  | 1.254 | SM.Only.Up.7D |
| YIPF5    |  |  |  |  |  |  |  |  | 1.375 | SM.Only.Up.7D |
| ZDHC13   |  |  |  |  |  |  |  |  | 1.161 | SM.Only.Up.7D |
| ZNF133   |  |  |  |  |  |  |  |  | 1.129 | SM.Only.Up.7D |
| ZNF214   |  |  |  |  |  |  |  |  | 1.115 | SM.Only.Up.7D |
| ZNF81    |  |  |  |  |  |  |  |  | 2.445 | SM.Only.Up.7D |
| ZPLD1    |  |  |  |  |  |  |  |  | 1.168 | SM.Only.Up.7D |
| ZLFP     |  |  |  |  |  |  |  |  | 1.135 | SM.Only.Up.7D |
| ZW10     |  |  |  |  |  |  |  |  | 1.009 | SM.Only.Up.7D |
| ZWINT    |  |  |  |  |  |  |  |  | 1.204 | SM.Only.Up.7D |
