# Supplementary material for: Temporal Network Based Analysis of Cell Specific Vein Graft Transcriptome Defines Key Pathways and Hub Genes in Implantation Injury
Source: PubMed Central journal article supplement (PMC3376111; doi:10.1371/journal.pone.0039123), 2012-06-15
Supplement: pone.0039123.s013.pdf [file pone.0039123.s013.pdf]

**Table S3A: Gene Ontology enrichment analysis of EC K-means clusters.**

**Cluster I-**

| Primary Processes | Term                                                           | Genes                                                                                                                                                                   | Count | %          | PValue   | FDR        |
|-------------------|----------------------------------------------------------------|-------------------------------------------------------------------------------------------------------------------------------------------------------------------------|-------|------------|----------|------------|
|                   | <b>GO:0042981~regulation of apoptosis</b>                      | DLC1, IER3, CSF2, PTGS2, HSPA1A, NFKB1, GCH1, PLAGL1, EDNRB, BDNF, THBS1, MYC, FOSL1, IL6, CRYAB, SOCS3, CYCS, AARS, NR4A1, BIRC3, BTG2, IL12A, RIPK2, DCUN1D3, TNFAIP3 | 25    | 17.4825175 | 2.04E-07 | 3.39E-04   |
|                   | <b>GO:0009611~response to wounding</b>                         | IRAK2, GNA13, SELP, KLF6, NFKB1, IL6, NFKBID, MAP2K3, C4BPB, NFKB1, TNFAIP6, ADM, EREG, RIPK2, HBEGF, THBS1, SELE, KDM6B                                                | 18    | 12.5874126 | 5.92E-06 | 0.00985864 |
| Related Processes | <b>GO:0048870~cell motility</b>                                | FGF19, SELP, IL6, VCAM1, EDNRB, NDEL1, ID1, IL12A, DNAJA1, HBEGF, THBS1, PPAP2B, SELE                                                                                   | 13    | 9.09090909 | 2.28E-05 | 0.0380667  |
|                   | <b>GO:0006954~inflammatory response</b>                        | IRAK2, NFKB1, SELP, IL6, NFKBID, MAP2K3, NFKB1, C4BPB, TNFAIP6, RIPK2, THBS1, SELE, KDM6B                                                                               | 13    | 9.09090909 | 3.99E-05 | 0.06652501 |
|                   | <b>GO:0043067~regulation of programmed cell death</b>          | DLC1, IER3, CSF2, PTGS2, HSPA1A, NFKB1, GCH1, PLAGL1, EDNRB, BDNF, THBS1, MYC, FOSL1, IL6, CRYAB, SOCS3, CYCS, AARS, NR4A1, BIRC3, BTG2, IL12A, RIPK2, DCUN1D3, TNFAIP3 | 25    | 17.4825175 | 2.44E-07 | 4.07E-04   |
|                   | <b>GO:0010941~regulation of cell death</b>                     | DLC1, IER3, CSF2, PTGS2, HSPA1A, NFKB1, GCH1, PLAGL1, EDNRB, BDNF, THBS1, MYC, FOSL1, IL6, CRYAB, SOCS3, CYCS, AARS, NR4A1, BIRC3, BTG2, IL12A, RIPK2, DCUN1D3, TNFAIP3 | 25    | 17.4825175 | 2.61E-07 | 4.35E-04   |
|                   | <b>GO:0043066~negative regulation of apoptosis</b>             | CSF2, IER3, IL6, SOCS3, CRYAB, AARS, HSPA1A, NFKB1, BIRC3, EDNRB, BDNF, BTG2, RIPK2, TNFAIP3, THBS1, MYC                                                                | 16    | 11.1888112 | 7.43E-07 | 0.00123809 |
|                   | <b>GO:0043069~negative regulation of programmed cell death</b> | CSF2, IER3, IL6, SOCS3, CRYAB, AARS, HSPA1A, NFKB1, BIRC3, EDNRB, BDNF, BTG2, RIPK2, TNFAIP3, THBS1, MYC                                                                | 16    | 11.1888112 | 8.86E-07 | 0.0014772  |
|                   | <b>GO:0060548~negative regulation of cell death</b>            | CSF2, IER3, IL6, SOCS3, CRYAB, AARS, HSPA1A, NFKB1, BIRC3, EDNRB, BDNF, BTG2, RIPK2, TNFAIP3, THBS1, MYC                                                                | 16    | 11.1888112 | 9.18E-07 | 0.00152974 |
|                   | <b>GO:0006916~anti-apoptosis</b>                               | CSF2, IER3, BDNF, SOCS3, CRYAB, RIPK2, NFKB1, HSPA1A, TNFAIP3, BIRC3, THBS1, MYC                                                                                        | 12    | 8.39160839 | 2.72E-06 | 0.00452938 |

**Cluster II**

| Primary Processes | Term                                                         | Genes                                                                                                                                                                                                                             | Count | %          | PValue     | FDR        |
|-------------------|--------------------------------------------------------------|-----------------------------------------------------------------------------------------------------------------------------------------------------------------------------------------------------------------------------------|-------|------------|------------|------------|
|                   | <b>GO:0006955~immune response</b>                            | IL1R2, AQP9, NCF1C, CCL7, CFP, NUDCD1, IL1RAP, LTF, IL1B, CD4, CLEC4D, IL1A, IL18R1, IL18RAP, OLR1, IL8, NCF2, NCF4, IL1RL2, NLRP3, TNFSF8, PRELID1, LAT2, IL18BP, PPBP, LILRB3, LYST, PLCG2, CLEC7A, TREM1, HSPD1, CLEC5A, PTAFR | 33    | 15.3488372 | 5.81E-10   | 9.81E-07   |
|                   | <b>GO:0006954~inflammatory response</b>                      | BMP2, IL18RAP, IL8, S100A8, OLR1, ADORA2A, S100A9, NLRP3, CCL7, CFP, TFRC, AOA, CCR3, IL1RAP, IL1B, CLEC7A, IL1A, PTAFR                                                                                                           | 18    | 8.37209302 | 1.71E-06   | 0.00289533 |
|                   | <b>GO:0030595~leukocyte chemotaxis</b>                       | IL8, LYST, S100A9, IL1B, ITGAM, SYK                                                                                                                                                                                               | 6     | 2.79069767 | 1.25E-04   | 0.21084822 |
|                   | <b>GO:0019220~regulation of phosphate metabolic process</b>  | C13ORF18, BMP2, PLEK, HMGR, ADORA2A, KITLG, INHBA, SPRED2, IL1B, CD4, NRG1, FGD4, SYK, IL22RA2, HTR2A                                                                                                                             | 15    | 6.97674419 | 0.00566398 | 9.14741415 |
|                   | <b>GO:0051174~regulation of phosphorus metabolic process</b> | C13ORF18, BMP2, PLEK, HMGR, ADORA2A, KITLG, INHBA, SPRED2, IL1B, CD4, NRG1, FGD4, SYK, IL22RA2, HTR2A                                                                                                                             | 15    | 6.97674419 | 0.00566398 | 9.14741415 |
|                   | <b>GO:0006801~superoxide metabolic process</b>               | CY5R4, NCF2, PREX1, NCF1C                                                                                                                                                                                                         | 4     | 1.86046512 | 0.00436282 | 7.11849035 |
|                   | <b>GO:0016072~rRNA metabolic process</b>                     | NOP2, RRP1B, DKC1, NOP58, FBL, FTSJ3                                                                                                                                                                                              | 6     | 2.79069767 | 0.00930976 | 14.612509  |
| Related Processes | <b>GO:0006935~chemotaxis</b>                                 | CCRL2, PPBP, IL8, LYST, CCR3, S100A9, IL1B, ITGAM, CCL7, PTAFR, SYK                                                                                                                                                               | 11    | 5.11627907 | 5.78E-05   | 0.09754602 |
|                   | <b>GO:0022613~ribonucleoprotein complex biogenesis</b>       | EIF6, NOP2, RRP1B, DKC1, WDR77, NOP58, SNRPF, FBL, FTSJ3, MRTO4                                                                                                                                                                   | 10    | 4.65116279 | 7.07E-04   | 1.18754184 |
|                   | <b>GO:0060326~cell chemotaxis</b>                            | IL8, LYST, S100A9, IL1B, ITGAM, SYK                                                                                                                                                                                               | 6     | 2.79069767 | 1.62E-04   | 0.27246362 |

|                                                                                      |                                                                               |    |            |          |            |
|--------------------------------------------------------------------------------------|-------------------------------------------------------------------------------|----|------------|----------|------------|
| <b>GO:0002768~immune response-regulating cell surface receptor signaling pathway</b> | LAT2, PLCG2, PTPN22, CACNB4, CLEC7A, SYK                                      | 6  | 2.79069767 | 2.31E-04 | 0.38950546 |
| <b>GO:0002253~activation of immune response</b>                                      | CFP, LAT2, PLCG2, PTPN22, CACNB4, CLEC7A, HSPD1, SYK                          | 8  | 3.72093023 | 2.63E-04 | 0.4426927  |
| <b>GO:0045321~leukocyte activation</b>                                               | LAT2, IL8, PREX1, PLCG2, PTPN22, BCL6, CD4, TREML2, CLEC7A, HSPD1, ITGAM, SYK | 12 | 5.58139535 | 4.14E-04 | 0.69618021 |

### Cluster III

| Primary Processes | Term                                                                | Genes                                                   | Count | %          | PValue     | FDR        |
|-------------------|---------------------------------------------------------------------|---------------------------------------------------------|-------|------------|------------|------------|
|                   | <b>GO:0009259~ribonucleotide metabolic process</b>                  | TCIRG1, NME1, ADK, ADSL, ATP1A1, PAICS                  | 6     | 4.28571429 | 0.00721917 | 11.1943138 |
|                   | <b>GO:0045321~leukocyte activation</b>                              | ITGAL, CPLX2, DOCK2, CHD7, GIMAP5, TPD52, HELLS         | 7     | 5          | 0.01468331 | 21.5241278 |
|                   | <b>GO:0002520~immune system development</b>                         | SGPL1, DOCK2, CHD7, GIMAP5, CASP8, SLC25A38, TPD52, KDR | 8     | 5.71428571 | 0.00764275 | 11.813136  |
| Related Processes |                                                                     |                                                         |       |            |            |            |
|                   | <b>GO:0002521~leukocyte differentiation</b>                         | DOCK2, CHD7, GIMAP5, CASP8, TPD52                       | 5     | 3.57142857 | 0.02271658 | 31.3753295 |
|                   | <b>GO:0009156~ribonucleoside monophosphate biosynthetic process</b> | ADK, ADSL, PAICS                                        | 3     | 2.14285714 | 0.01508621 | 22.0482739 |
|                   | <b>GO:0009152~purine ribonucleotide biosynthetic process</b>        | TCIRG1, NME1, ADSL, ATP1A1, PAICS                       | 5     | 3.57142857 | 0.01567157 | 22.8039335 |

### Cluster IV

| Primary Processes | Term                                                          | Genes                                                                                                                                                                                                                                                          | Count | %   | PValue   | FDR        |
|-------------------|---------------------------------------------------------------|----------------------------------------------------------------------------------------------------------------------------------------------------------------------------------------------------------------------------------------------------------------|-------|-----|----------|------------|
|                   | <b>GO:0006954~inflammatory response</b>                       | CCL2, ADORA3, LYN, AIF1, LY86, TLR1, IL1RN, TLR2, C1R, CCL4, SLC11A1, CYBB, CXCR4, IL10RB, PLA2G7, SERPINA1, CD14                                                                                                                                              | 17    | 8.5 | 1.79E-06 | 0.00295887 |
|                   | <b>GO:0002252~immune effector process</b>                     | SLC11A1, PTPRC, TNFSF13B, LYN, TUBB2C, FCER1G, C1R, LY9, PRKCD, HLA-DRA                                                                                                                                                                                        | 10    | 5   | 3.30E-05 | 0.0545404  |
|                   | <b>GO:0045321~leukocyte activation</b>                        | PTPRC, LYN, TLR1, TLR2, ITGA4, SKAP2, PRKCD, VAV1, CD48, SLC11A1, CD80, CXCR4, LCP1, LCP2, PLAT, CCL2, VAV3, S100P, WASF1, TUBB2C, ARF6, ITGA4, CCL4, TPM3, PLAUR, ARPC1B, CORO1A, CXCR4, ARPC2, CXCL16, VCAN                                                  | 14    | 7   | 6.82E-06 | 0.01128355 |
|                   | <b>GO:0006928~cell motion</b>                                 | ARPC2, CXCL16, VCAN                                                                                                                                                                                                                                            | 17    | 8.5 | 1.86E-04 | 0.30725174 |
|                   | <b>GO:0001817~regulation of cytokine production</b>           | CD83, SLC11A1, BPI, CD80, IL18, TLR1, PYCARD, TLR2, FCER1G, CD14                                                                                                                                                                                               | 10    | 5   | 3.29E-04 | 0.54236694 |
| Related Processes |                                                               |                                                                                                                                                                                                                                                                |       |     |          |            |
|                   | <b>GO:0006955~immune response</b>                             | CCL2, LY86, IL18, GPM3, TUBB2C, TLR1, TLR2, GPR65, C1R, LY9, CCL4, IL31RA, SLC11A1, CLEC4E, CXCR4, IL10RB, FCGR1A, FCER1G, IL2RG, FYB, PTPRC, C5AR1, LYN, IL1RN, CD1A, VAV1, PRKCD, CD83, CORO1A, CYBB, OASL, BPI, TNFSF13B, CXCL16, CD14, LCP1, LCP2, HLA-DRA | 38    | 19  | 6.69E-15 | 1.10E-11   |
|                   | <b>GO:0002696~positive regulation of leukocyte activation</b> | CD83, PTPRC, CDKN1A, CORO1A, PLDN, TNFSF13B, CD80, IL18, IL2RG                                                                                                                                                                                                 | 9     | 4.5 | 3.97E-05 | 0.06564029 |
|                   | <b>GO:0050865~regulation of cell activation</b>               | CD83, PTPRC, CDKN1A, CORO1A, BPI, PLDN, TNFSF13B, CD80, IL18, IL2RG, IL31RA                                                                                                                                                                                    | 11    | 5.5 | 4.82E-05 | 0.07978162 |
|                   | <b>GO:0050867~positive regulation of cell activation</b>      | CD83, PTPRC, CDKN1A, CORO1A, PLDN, TNFSF13B, CD80, IL18, IL2RG                                                                                                                                                                                                 | 9     | 4.5 | 5.52E-05 | 0.09135682 |
|                   | <b>GO:0002443~leukocyte mediated immunity</b>                 | SLC11A1, LYN, TUBB2C, FCER1G, C1R, LY9, PRKCD, HLA-DRA                                                                                                                                                                                                         | 8     | 4   | 7.54E-05 | 0.12466234 |
|                   | <b>GO:0042981~regulation of apoptosis</b>                     | PIK3CG, PTPRC, CCL2, VAV3, BCL2A1, TUBB2C, PIM1, TLR2, STK17B, STK17A, HGF, ANXA5, CALR, VAV1, IL31RA, BTK, CASP10, CDKN1A, CASP4, TNFSF13B, TIAM2, PYCARD, CSTB, HSPA5                                                                                        | 24    | 12  | 8.70E-05 | 0.14380631 |

|                                                       |                                                                                                                                                                         |    |    |          |            |
|-------------------------------------------------------|-------------------------------------------------------------------------------------------------------------------------------------------------------------------------|----|----|----------|------------|
| <b>GO:0043067~regulation of programmed cell death</b> | PIK3CG, PTPRC, CCL2, VAV3, BCL2A1, TUBB2C, PIM1, TLR2, STK17B, STK17A, HGF, ANXA5, CALR, VAV1, IL31RA, BTK, CASP10, CDKN1A, CASP4, TNFSF13B, TIAM2, PYCARD, CSTB, HSPA5 | 24 | 12 | 1.01E-04 | 0.16684037 |
| <b>GO:0010941~regulation of cell death</b>            | PIK3CG, PTPRC, CCL2, VAV3, BCL2A1, TUBB2C, PIM1, TLR2, STK17B, STK17A, HGF, ANXA5, CALR, VAV1, IL31RA, BTK, CASP10, CDKN1A, CASP4, TNFSF13B, TIAM2, PYCARD, CSTB, HSPA5 | 24 | 12 | 1.07E-04 | 0.17629307 |

#### Cluster V

| Term                                                                                                        | Genes                                                                                                                                                                                                                                      | Count | %          | PValue     | FDR        |
|-------------------------------------------------------------------------------------------------------------|--------------------------------------------------------------------------------------------------------------------------------------------------------------------------------------------------------------------------------------------|-------|------------|------------|------------|
| <b>GO:0007067~mitosis</b>                                                                                   | KIF23, KIFC1, NEK2, ANLN, PTTG1, KIF2C, SPC25, NCAPH, NCAPG, CDCA2, CCNA2, ASPM, ERCC6L, CDCA3, CDC6, KIF11, DLGAP5, KIF15, TPX2, NUF2, KIF18A, BIRC5, NDC80, PBK, UBE2C, NCAPD3, CCNB1, MAD2L1, RCC2, BUB1B, C21ORF45                     | 31    | 19.8717949 | 7.50E-26   | 1.20E-22   |
| <b>GO:0002495~antigen processing and presentation of peptide antigen via MHC class II</b>                   | IFI30, HLA-DMA, CD74                                                                                                                                                                                                                       | 3     | 1.92307692 | 0.00269999 | 4.24266828 |
| <b>GO:0002504~antigen processing and presentation of peptide or polysaccharide antigen via MHC class II</b> | HLA-DQB1, IFI30, HLA-DMB, HLA-DMA, CD74, HLA-DQA1                                                                                                                                                                                          | 6     | 3.84615385 | 1.81E-05   | 0.02894663 |
| <b>GO:0000278~mitotic cell cycle</b>                                                                        | KIF23, KIFC1, PRC1, NEK2, ANLN, PTTG1, CCNE1, KIF2C, SPC25, NCAPH, NCAPG, CDCA2, CCNA2, ASPM, ERCC6L, CDCA3, CDC6, KIF11, DLGAP5, KIF15, TPX2, NUF2, KIF18A, BIRC5, NDC80, PBK, UBE2C, CDKN3, NCAPD3, CCNB1, MAD2L1, RCC2, BUB1B, C21ORF45 | 34    | 21.7948718 | 1.96E-22   | 3.14E-19   |
| <b>GO:0000070~mitotic sister chromatid segregation</b>                                                      | KIFC1, NCAPH, MAD2L1, NEK2, NCAPG, DLGAP5, KIF18A, NDC80, NCAPD3                                                                                                                                                                           | 9     | 5.76923077 | 2.02E-09   | 3.25E-06   |
| <b>GO:0007052~mitotic spindle organization</b>                                                              | KIF23, SPC25, KIF11, PRC1, NDC80                                                                                                                                                                                                           | 5     | 3.20512821 | 1.22E-05   | 0.0196269  |
| <b>GO:0019882~antigen processing and presentation</b>                                                       | HLA-DQB1, IFI30, HLA-DMB, HLA-DMA, CD74, HLA-DQA1                                                                                                                                                                                          | 6     | 3.84615385 | 0.00147849 | 2.34459356 |
| <b>GO:0007346~regulation of mitotic cell cycle</b>                                                          | CDC6, MAD2L1, NEK2, DLGAP5, BUB1B, BIRC5, ANLN, UBE2C, CCNA2                                                                                                                                                                               | 9     | 5.76923077 | 1.48E-04   | 0.23660116 |
| <b>GO:0019886~antigen processing and presentation of exogenous peptide antigen via MHC class II</b>         | IFI30, HLA-DMA, CD74                                                                                                                                                                                                                       | 3     | 1.92307692 | 0.00269999 | 4.24266828 |
| <b>GO:0002478~antigen processing and presentation of exogenous peptide antigen</b>                          | IFI30, HLA-DMA, CD74                                                                                                                                                                                                                       | 3     | 1.92307692 | 0.00519973 | 8.01966124 |

#### Cluster VI

##### Primary Processes

| Term                                                                             | Genes                                                                   | Count | %          | PValue   | FDR        |
|----------------------------------------------------------------------------------|-------------------------------------------------------------------------|-------|------------|----------|------------|
| <b>GO:0030199~collagen fibril organization</b>                                   | LUM, COL3A1, COL1A2, COL1A1, LOX, ADAMTS3, COL5A2, ADAMTS2, COL5A1      | 9     | 7.5        | 3.22E-11 | 5.19E-08   |
| <b>GO:0030198~extracellular matrix organization</b>                              | LUM, COL3A1, COL1A2, DCN, COL1A1, LOX, ADAMTS3, COL5A2, ADAMTS2, COL5A1 | 10    | 8.33333333 | 9.11E-08 | 1.47E-04   |
| <b>GO:0051604~protein maturation</b>                                             | C1QA, C7, C6, KLKB1, C1S, ADAMTS3, C1QC, ADAMTS2                        | 8     | 6.66666667 | 3.95E-05 | 0.06366734 |
| <b>GO:0002455~humoral immune response mediated by circulating immunoglobulin</b> | C1QA, C7, C6, C1S, C1QC                                                 | 5     | 4.16666667 | 8.51E-05 | 0.1371088  |

##### Related Processes

|                                                        |                                                                                                                                                                      |    |             |          |          |
|--------------------------------------------------------|----------------------------------------------------------------------------------------------------------------------------------------------------------------------|----|-------------|----------|----------|
| <b>GO:0043062~extracellular structure organization</b> | LUM, COL3A1, NLGN1, DCN, COL5A2, COL5A1, COL1A2, LOX, COL1A1, AGRN, ADAMTS3, ADAMTS2, F2R                                                                            | 13 | 10.83333333 | 3.70E-09 | 5.96E-06 |
| <b>GO:0065004~protein-DNA complex assembly</b>         | HIST1H2BB, HIST1H2BC, HIST1H2BD, HIST1H2BE, HIST1H2BF, HIST1H2BG, HIST1H2BH, CENPF, HIST1H2BO, HIST1H2BN, H2BFS, HIST1H2BK, HIST2H2BE, HIST1H2BI, HIST1H2BJ, HIST3H3 | 12 | 10          | 8.25E-11 | 1.33E-07 |

|                                              |                                                                                                                                                                       |    |            |          |                     |
|----------------------------------------------|-----------------------------------------------------------------------------------------------------------------------------------------------------------------------|----|------------|----------|---------------------|
| <b>GO:0006334~nucleosome assembly</b>        | HIST1H2BB, HIST1H2BC, HIST1H2BD, HIST1H2BE, HIST1H2BF, HIST1H2BG, HIST1H2BH, HIST1H2BO, HIST1H2BN, H2BFS, HIST1H2BK, HIST2H2BE, HIST1H2BI, HIST1H2BJ, HIST3H3         | 11 | 9.16666667 | 7.26E-10 | 1.17E-06            |
| <b>GO:0031497~chromatin assembly</b>         | HIST1H2BB, HIST1H2BC, HIST1H2BD, HIST1H2BE, HIST1H2BF, HIST1H2BG, HIST1H2BH, HIST1H2BO, HIST1H2BN, H2BFS, HIST1H2BK, HIST2H2BE, HIST1H2BI, HIST1H2BJ, HIST3H3         | 11 | 9.16666667 | 1.03E-09 | 1.66E-06            |
| <b>GO:0006323~DNA packaging</b>              | HIST1H2BB, HIST1H2BC, HIST1H2BD, HIST1H2BE, HIST1H2BF, HIST1H2BG, HIST1H2BH, NUSAP1, HIST1H2BO, HIST1H2BN, H2BFS, HIST1H2BK, HIST2H2BE, HIST1H2BI, HIST1H2BJ, HIST3H3 | 12 | 10         | 1.29E-09 | 2.07E-06            |
| <b>GO:0034728~nucleosome organization</b>    | HIST1H2BB, HIST1H2BC, HIST1H2BD, HIST1H2BE, HIST1H2BF, HIST1H2BG, HIST1H2BH, HIST1H2BO, HIST1H2BN, H2BFS, HIST1H2BK, HIST2H2BE, HIST1H2BI, HIST1H2BJ, HIST3H3         | 11 | 9.16666667 | 2.01E-09 | 3.24E-06            |
| <b>GO:0032963~collagen metabolic process</b> | COL3A1, COL1A1, ADAMTS3, ADAMTS2, MMP2, COL5A1                                                                                                                        | 6  |            | 5        | 1.98E-06 0.00319726 |
| <b>GO:0043588~skin development</b>           | COL3A1, COL1A2, COL1A1, COL5A2, ADAMTS2, COL5A1                                                                                                                       | 6  |            | 5        | 2.38E-06 0.00384008 |

#### Cluster VII

| Primary Processes | Term                                                         | Genes                                                                                                                                                             | Count | %          | PValue     | FDR        |
|-------------------|--------------------------------------------------------------|-------------------------------------------------------------------------------------------------------------------------------------------------------------------|-------|------------|------------|------------|
|                   | <b>GO:0006936~muscle contraction</b>                         | KCNMA1, FXYD1, SLC8A1, GNAO1, PDE4D, EDNRA, ACTG2, DES, SMTN, SLMAP, RYR2, MYOM1, CHRNA1, SGCA, DTNA                                                              | 15    | 4.42477876 | 1.28E-06   | 0.00216832 |
|                   | <b>GO:0030182~neuron differentiation</b>                     | KCNMA1, CCK, GNAO1, TUBB2B, NTF3, MDGA1, EMX2, PTPRR, SOX5, LIFR, RORB, RORA, SLIT2, GPR98, NTRK3, EFHD1, ALDH1A2, DGKG, DMD, BCL2, NTRK2, SMARCA1, SLITRK6, FEZ1 | 24    | 7.07964602 | 1.06E-05   | 0.01803256 |
|                   | <b>GO:0050880~regulation of blood vessel size</b>            | KCNMA1, EDNRA, ACTG2, P2RX1, NTS, KCNJ8, PDE5A, GUCY1A3                                                                                                           | 8     | 2.35988201 | 6.02E-05   | 0.10203775 |
|                   | <b>GO:0009187~cyclic nucleotide metabolic process</b>        | ADCY5, PDE5A, GUCY1A2, GUCY1A3, PDE8B, PDE4D, RORA                                                                                                                | 7     | 2.06489676 | 7.35E-05   | 0.12461839 |
|                   | <b>GO:0003018~vascular process in circulatory system</b>     | KCNMA1, EDNRA, ACTG2, P2RX1, NTS, KCNJ8, PDE5A, GUCY1A3                                                                                                           | 8     | 2.35988201 | 1.08E-04   | 0.1835343  |
|                   | <b>GO:0008016~regulation of heart contraction</b>            | SLC8A1, DES, CYP2J2, GNAO1, ATP2A2, RYR2, S100A1, DMPK                                                                                                            | 8     | 2.35988201 | 6.38E-04   | 1.07666117 |
| Related Processes | <b>GO:0009991~response to extracellular stimulus</b>         | RBP4, SLC8A1, A2M, CCK, GATM, TIMP3, PPARGC1A, ALDH1A2, GSN, BCL2, RYR2, SLC22A3, VLDLR                                                                           | 13    | 3.83480826 | 0.00103136 | 1.73547215 |
|                   | <b>GO:0044057~regulation of system process</b>               | KCNMA1, SLC8A1, SNCAIP, CCK, CYP2J2, GNAO1, NTF3, PPP1R12B, EPHX2, KCNMB2, MYL9, DMPK, PLCE1, DES, P2RX1, ATP2A2, NTRK2, RYR2, GUCY1A3, CNN1, LGI1, S100A1        | 22    | 6.48967552 | 4.58E-07   | 7.77E-04   |
|                   | <b>GO:0055082~cellular chemical homeostasis</b>              | KCNMA1, FXYD1, PLP1, SLC8A1, CCK, NTF3, EPHX2, PPARGC1A, ITPR1, KCNMB2, DMPK, EDNRA, PLCE1, P2RX1, ATP2A2, BCL2, RYR2, RGN, CHRNA1                                | 19    | 5.60471976 | 3.52E-04   | 0.59596295 |
|                   | <b>GO:0048878~chemical homeostasis</b>                       | KCNMA1, FXYD1, RBP4, SLC8A1, PLP1, CCK, NTF3, EPHX2, PPARGC1A, TCF7L2, ITPR1, KCNMB2, DMPK, EDNRA, PLCE1, GOT1, P2RX1, ATP2A2, BCL2, RYR2, RGN, CHRNA1            | 22    | 6.48967552 | 7.80E-04   | 1.31524496 |
|                   | <b>GO:0006873~cellular ion homeostasis</b>                   | KCNMA1, FXYD1, PLP1, SLC8A1, CCK, NTF3, EPHX2, ITPR1, KCNMB2, DMPK, EDNRA, PLCE1, P2RX1, ATP2A2, BCL2, RYR2, RGN, CHRNA1                                          | 18    | 5.30973451 | 8.14E-04   | 1.37241534 |
|                   | <b>GO:0009123~nucleoside monophosphate metabolic process</b> | ADCY5, PDE5A, GUCY1A2, GUCY1A3, PDE8B, PDE4D, RORA                                                                                                                | 7     | 2.06489676 | 0.00155329 | 2.6028806  |
|                   | <b>GO:0042490~mechanoreceptor differentiation</b>            | KCNMA1, NTRK3, NTF3, NTRK2, GPR98                                                                                                                                 | 5     | 1.47492625 | 0.00207938 | 3.4699109  |

#### Cluster VIII

| Primary Processes | Term                                                        | Genes                                                                            | Count | %          | PValue     | FDR        |
|-------------------|-------------------------------------------------------------|----------------------------------------------------------------------------------|-------|------------|------------|------------|
|                   | <b>GO:0019220~regulation of phosphate metabolic process</b> | ALS2, BMP4, CDKN2C, CCDC88C, EFNA1, MAP3K1, IGF1, PDGFC, PDCD4, INSR, TRIB2, GHR | 12    | 6.28272251 | 0.00976646 | 14.7884872 |

|                                                                         |                                                                                  |    |            |            |            |
|-------------------------------------------------------------------------|----------------------------------------------------------------------------------|----|------------|------------|------------|
| <b>GO:0051174~regulation of phosphorus metabolic process</b>            | ALS2, BMP4, CDKN2C, CCDC88C, EFNA1, MAP3K1, IGF1, PDGFC, PDCD4, INSR, TRIB2, GHR | 12 | 6.28272251 | 0.00976646 | 14.7884872 |
| <b>GO:0060429~epithelium development</b>                                | BMP4, LAMA3, SHROOM3, HOXA5, PPL, IFT172, JAG1, NR2F2                            | 8  | 4.18848168 | 0.008026   | 12.3132323 |
| <b>GO:0043405~regulation of MAP kinase activity</b>                     | EFNA1, MAP3K1, PDCD4, INSR, TRIB2, GHR                                           | 6  | 3.14136126 | 0.01389214 | 20.3964949 |
| <b>GO:0043471~regulation of cellular carbohydrate catabolic process</b> | PPP1R3C, IGF1, INSR                                                              | 3  | 1.57068063 | 0.01097828 | 16.4730326 |
| <b>GO:0043470~regulation of carbohydrate catabolic process</b>          | PPP1R3C, IGF1, INSR                                                              | 3  | 1.57068063 | 0.01097828 | 16.4730326 |

Related Processes

|                                                                    |                                                                                  |    |            |            |            |
|--------------------------------------------------------------------|----------------------------------------------------------------------------------|----|------------|------------|------------|
| <b>GO:0001932~regulation of protein amino acid phosphorylation</b> | BMP4, CCDC88C, MAP3K1, IGF1, PDGFC, PDCD4, INSR, GHR                             | 8  | 4.18848168 | 0.00181501 | 2.91877842 |
| <b>GO:0042325~regulation of phosphorylation</b>                    | ALS2, BMP4, CDKN2C, CCDC88C, EFNA1, MAP3K1, IGF1, PDGFC, PDCD4, INSR, TRIB2, GHR | 12 | 6.28272251 | 0.00735354 | 11.338912  |
| <b>GO:0002009~morphogenesis of an epithelium</b>                   | BMP4, SHROOM3, HOXA5, IFT172, JAG1                                               | 5  | 2.61780105 | 0.01885406 | 26.6822636 |
| <b>GO:0045859~regulation of protein kinase activity</b>            | ALS2, CDKN2C, EFNA1, MAP3K1, PDGFC, PDCD4, INSR, TRIB2, GHR                      | 9  | 4.71204189 | 0.02322012 | 31.8248538 |

**Table S3B: Gene Ontology enrichment analysis of SMC K-means clusters**

**Cluster I**

| Primary Proc      | Term                                                                            | Genes                                                                                                                                                                                                                               | Count | %          | PValue   | FDR        |
|-------------------|---------------------------------------------------------------------------------|-------------------------------------------------------------------------------------------------------------------------------------------------------------------------------------------------------------------------------------|-------|------------|----------|------------|
|                   | GO:0042981~regulation of apoptosis                                              | IER3, CCL2, PTGS2, STK17B, NFKBIA, NFKB1, GCH1, PLAGL1, EDNRB, BDNF, THBS1, MYC, FOSL1, ANGPTL4, IL6, CRYAB, SOCS3, CYCS, NR4A2, NR4A1, MALT1, BIRC3, BIRC2, CDKN1A, DUSP1, BTG2, TNFAIP3, DCUN1D3                                  | 28    | 17.3913044 | 3.35E-08 | 5.60E-05   |
|                   | GO:0006952~defense response                                                     | SELP, NFKBIZ, IL6, IL1R1, CCL2, NFKBID, MAP2K3, IL1RN, MALT1, NFKB1, CD40, CCL4, GCH1, HDAC4, FOS, TNFAIP6, KCNJ8, CXCL16, THBS1, FOSL1, TNIP1, SELE                                                                                | 22    | 13.6645963 | 1.06E-06 | 0.00177337 |
|                   | GO:0050900~leukocyte migration                                                  | VCAM1, ICAM1, SELP, EDNRB, IL6, CCL2, CXCL16, SELE                                                                                                                                                                                  | 8     | 4.9689441  | 1.71E-06 | 0.00285081 |
|                   | GO:0048870~cell motility                                                        | FGF19, ICAM1, SELP, IL6, CCL2, NR4A2, VCAM1, EDNRB, NDEL1, CXCL16, DNAJA1, HBEGF, THBS1, SELE                                                                                                                                       | 14    | 8.69565217 | 1.53E-05 | 0.02553435 |
| Related Processes |                                                                                 |                                                                                                                                                                                                                                     |       |            |          |            |
|                   | GO:0010033~response to organic substance                                        | IL1R1, CCL2, PTGS2, NFKBIA, GCH1, TRIB1, FOS, PLIN2, DNAJA1, THBS1, MYC, FOSL1, HSPA8, CYR61, EGR1, SELP, IL6, CRYAB, SOCS3, IL1RN, NR4A2, MALT1, BIRC2, HDAC4, CDKN1A, GLUL, THBD, BTG2, DUSP1, KCNJ8, CXCL16, DNAJB1, PTPN1, SELE | 34    | 21.1180124 | 1.68E-13 | 2.81E-10   |
|                   | GO:0002237~response to molecule of bacterial origin                             | SELP, IL6, CCL2, PTGS2, SOCS3, NFKBIA, MALT1, GCH1, TRIB1, FOS, THBD, KCNJ8, SELE                                                                                                                                                   | 13    | 8.07453416 | 6.29E-11 | 1.05E-07   |
|                   | GO:0032496~response to lipopolysaccharide                                       | SELP, FOS, CCL2, THBD, PTGS2, KCNJ8, SOCS3, NFKBIA, SELE, TRIB1, GCH1                                                                                                                                                               | 11    | 6.83229814 | 5.39E-09 | 9.01E-06   |
|                   | GO:0051173~positive regulation of nitrogen compound metabolic process           | NFKBIA, NFKB1, PLAGL1, FOS, MEIS2, REL, TEAD4, ABRA, NFATC2, MYC, FOSL1, HBB, SERTAD1, EGR1, KLF5, KLF6, ICAM1, IL6, MAP2K3, NR4A2, NR4A1, CD40, HHEX, HDAC4, IRF1                                                                  | 25    | 15.5279503 | 3.13E-08 | 5.24E-05   |
|                   | GO:0043067~regulation of programmed cell death                                  | IER3, CCL2, PTGS2, STK17B, NFKBIA, NFKB1, GCH1, PLAGL1, EDNRB, BDNF, THBS1, MYC, FOSL1, ANGPTL4, IL6, CRYAB, SOCS3, CYCS, NR4A2, NR4A1, MALT1, BIRC3, BIRC2, CDKN1A, DUSP1, BTG2, TNFAIP3, DCUN1D3                                  | 28    | 17.3913044 | 4.11E-08 | 6.88E-05   |
|                   | GO:0010941~regulation of cell death                                             | IER3, CCL2, PTGS2, STK17B, NFKBIA, NFKB1, GCH1, PLAGL1, EDNRB, BDNF, THBS1, MYC, FOSL1, ANGPTL4, IL6, CRYAB, SOCS3, CYCS, NR4A2, NR4A1, MALT1, BIRC3, BIRC2, CDKN1A, DUSP1, BTG2, TNFAIP3, DCUN1D3                                  | 28    | 17.3913044 | 4.44E-08 | 7.42E-05   |
|                   | GO:0031328~positive regulation of cellular biosynthetic process                 | NFKBIA, NFKB1, PLAGL1, FOS, MEIS2, REL, TEAD4, ABRA, THBS1, NFATC2, MYC, FOSL1, HBB, SERTAD1, EGR1, KLF5, KLF6, ICAM1, IL6, MAP2K3, NR4A2, NR4A1, HHEX, HDAC4, IRF1                                                                 | 25    | 15.5279503 | 1.00E-07 | 1.67E-04   |
|                   | GO:0043066~negative regulation of apoptosis                                     | IER3, IL6, CCL2, SOCS3, CRYAB, NR4A2, NFKBIA, MALT1, NFKB1, BIRC3, EDNRB, BDNF, CDKN1A, BTG2, TNFAIP3, THBS1, MYC, ANGPTL4                                                                                                          | 18    | 11.1801242 | 1.16E-07 | 1.95E-04   |
|                   | GO:0009891~positive regulation of biosynthetic process                          | NFKBIA, NFKB1, PLAGL1, FOS, MEIS2, REL, TEAD4, ABRA, THBS1, NFATC2, MYC, FOSL1, HBB, SERTAD1, EGR1, KLF5, KLF6, ICAM1, IL6, MAP2K3, NR4A2, NR4A1, HHEX, HDAC4, IRF1                                                                 | 25    | 15.5279503 | 1.31E-07 | 2.19E-04   |
|                   | GO:0043069~negative regulation of programmed cell death                         | IER3, IL6, CCL2, SOCS3, CRYAB, NR4A2, NFKBIA, MALT1, NFKB1, BIRC3, EDNRB, BDNF, CDKN1A, BTG2, TNFAIP3, THBS1, MYC, ANGPTL4                                                                                                          | 18    | 11.1801242 | 1.42E-07 | 2.38E-04   |
|                   | GO:0060548~negative regulation of cell death                                    | IER3, IL6, CCL2, SOCS3, CRYAB, NR4A2, NFKBIA, MALT1, NFKB1, BIRC3, EDNRB, BDNF, CDKN1A, BTG2, TNFAIP3, THBS1, MYC, ANGPTL4                                                                                                          | 18    | 11.1801242 | 1.48E-07 | 2.48E-04   |
|                   | GO:0045944~positive regulation of transcription from RNA polymerase II promoter | EGR1, KLF6, IL6, NR4A2, NFKBIA, NR4A1, NFKB1, PLAGL1, HDAC4, FOS, HHEX, MEIS2, TEAD4, IRF1, ABRA, NFATC2, FOSL1, MYC                                                                                                                | 18    | 11.1801242 | 2.27E-07 | 3.80E-04   |

|                                                                                                         |                                                                                                                                                                            |    |            |          |            |
|---------------------------------------------------------------------------------------------------------|----------------------------------------------------------------------------------------------------------------------------------------------------------------------------|----|------------|----------|------------|
| GO:0045941~positive regulation of transcription                                                         | KLF5, EGR1, KLF6, IL6, MAP2K3, NR4A2, NFKBIA, NR4A1, NFKB1, PLAGL1, HDAC4, HHEX, FOS, MEIS2, REL, TEAD4, IRF1, ABRA, NFATC2, FOSL1, MYC, SERTAD1                           | 22 | 13.6645963 | 2.58E-07 | 4.31E-04   |
| GO:0045935~positive regulation of nucleobase, nucleoside, nucleotide and nucleic acid metabolic process | KLF5, EGR1, KLF6, IL6, MAP2K3, NR4A2, NFKBIA, NR4A1, NFKB1, CD40, PLAGL1, HDAC4, HHEX, FOS, MEIS2, REL, TEAD4, IRF1, ABRA, NFATC2, FOSL1, MYC, SERTAD1                     | 23 | 14.2857143 | 3.30E-07 | 5.52E-04   |
| GO:0045893~positive regulation of transcription, DNA-dependent                                          | EGR1, KLF6, IL6, MAP2K3, NR4A2, NFKBIA, NR4A1, NFKB1, PLAGL1, HDAC4, FOS, HHEX, MEIS2, REL, TEAD4, IRF1, ABRA, NFATC2, FOSL1, MYC                                          | 20 | 12.4223603 | 3.68E-07 | 6.15E-04   |
| GO:0051254~positive regulation of RNA metabolic process                                                 | EGR1, KLF6, IL6, MAP2K3, NR4A2, NFKBIA, NR4A1, NFKB1, PLAGL1, HDAC4, FOS, HHEX, MEIS2, REL, TEAD4, IRF1, ABRA, NFATC2, FOSL1, MYC                                          | 20 | 12.4223603 | 4.18E-07 | 6.98E-04   |
| GO:0010628~positive regulation of gene expression                                                       | KLF5, EGR1, KLF6, IL6, MAP2K3, NR4A2, NFKBIA, NR4A1, NFKB1, PLAGL1, HDAC4, HHEX, FOS, MEIS2, REL, TEAD4, IRF1, ABRA, NFATC2, FOSL1, MYC, SERTAD1                           | 22 | 13.6645963 | 4.21E-07 | 7.04E-04   |
| GO:0009617~response to bacterium                                                                        | SELP, IL6, CCL2, PTGS2, SOCS3, NFKBIA, MALT1, GCH1, TRIB1, FOS, THBD, KCNJ8, SELE                                                                                          | 13 | 8.07453416 | 6.41E-07 | 0.00107157 |
| GO:0010557~positive regulation of macromolecule biosynthetic process                                    | KLF5, EGR1, KLF6, IL6, MAP2K3, NR4A2, NFKBIA, NR4A1, NFKB1, PLAGL1, HDAC4, HHEX, FOS, MEIS2, REL, TEAD4, IRF1, ABRA, NFATC2, THBS1, FOSL1, MYC, SERTAD1                    | 23 | 14.2857143 | 7.31E-07 | 0.00122266 |
| GO:0034097~response to cytokine stimulus                                                                | HDAC4, FOS, IL1R1, PTGS2, SOCS3, CXCL16, SELE, FOSL1, GCH1                                                                                                                 | 9  | 5.59006211 | 1.36E-06 | 0.00226845 |
| GO:0010604~positive regulation of macromolecule metabolic process                                       | NFKBIA, NFKB1, PLAGL1, FOS, EDNRB, MEIS2, REL, TEAD4, ABRA, THBS1, NFATC2, MYC, FOSL1, SERTAD1, EGR1, KLF5, KLF6, IL6, MAP2K3, NR4A2, NR4A1, CD40, HDAC4, HHEX, IRF1, SELE | 26 | 16.1490683 | 1.62E-06 | 0.00271515 |
| GO:0042127~regulation of cell proliferation                                                             | KLF5, NAMPT, IL6, TP53I11, CCL2, PTGS2, MARCKSL1, NFKBIA, CD40, TRIB1, VCAM1, HDAC4, HHEX, EDNRB, BDNF, CDKN1A, BTG2, CD274, SERPINE1, HBEGF, THBS1, MYC, FOSL1, SERTAD1   | 24 | 14.9068323 | 4.38E-06 | 0.00732742 |
| GO:0006954~inflammatory response                                                                        | SELP, NFKB1Z, IL6, CCL2, NFKBID, MAP2K3, IL1RN, NFKB1, CD40, CCL4, HDAC4, FOS, TNFAIP6, THBS1, SELE                                                                        | 15 | 9.31677019 | 5.81E-06 | 0.00971089 |
| GO:0009611~response to wounding                                                                         | SELP, KLF6, NFKB1Z, IL6, CCL2, NFKBID, MAP2K3, IL1RN, NFKB1, CD40, CCL4, HDAC4, FOS, TNFAIP6, THBD, SERPINE1, HBEGF, THBS1, SELE                                           | 19 | 11.8012422 | 7.27E-06 | 0.01215208 |
| GO:0006916~anti-apoptosis                                                                               | IER3, BDNF, CCL2, SOCS3, CRYAB, NFKBIA, NFKB1, MALT1, TNFAIP3, BIRC3, THBS1, MYC                                                                                           | 12 | 7.45341615 | 8.32E-06 | 0.01390483 |
| GO:0042493~response to drug                                                                             | HDAC4, FOS, TOP1, CDKN1A, BDNF, CCL2, PTGS2, PLIN2, SOCS3, ATP1A1, LRP2, FOSL1                                                                                             | 12 | 7.45341615 | 1.30E-05 | 0.02175714 |
| GO:0051384~response to glucocorticoid stimulus                                                          | FOS, CDKN1A, IL6, CCL2, PTGS2, DUSP1, IL1RN, FOSL1                                                                                                                         | 8  | 4.9689441  | 1.43E-05 | 0.02384076 |
| GO:0051674~localization of cell                                                                         | FGF19, ICAM1, SELP, IL6, CCL2, NR4A2, VCAM1, EDNRB, NDEL1, CXCL16, DNAJA1, HBEGF, THBS1, SELE                                                                              | 14 | 8.69565217 | 1.53E-05 | 0.02553435 |
| GO:0031960~response to corticosteroid stimulus                                                          | FOS, CDKN1A, IL6, CCL2, PTGS2, DUSP1, IL1RN, FOSL1                                                                                                                         | 8  | 4.9689441  | 2.51E-05 | 0.04197572 |
| GO:0016477~cell migration                                                                               | FGF19, ICAM1, SELP, IL6, CCL2, NR4A2, VCAM1, EDNRB, NDEL1, CXCL16, HBEGF, THBS1, SELE                                                                                      | 13 | 8.07453416 | 2.54E-05 | 0.04248735 |
| GO:0048545~response to steroid hormone stimulus                                                         | FOS, CDKN1A, IL6, CCL2, PTGS2, DUSP1, SOCS3, CRYAB, IL1RN, THBS1, FOSL1                                                                                                    | 11 | 6.83229814 | 2.69E-05 | 0.04499526 |
| GO:0006928~cell motion                                                                                  | FGF19, SELP, ICAM1, IL6, CCL2, PTGS2, NR4A2, CCL4, VCAM1, EDNRB, BDNF, NDEL1, CXCL16, DNAJA1, HBEGF, THBS1, SELE                                                           | 17 | 10.5590062 | 2.69E-05 | 0.04501342 |
| GO:0010647~positive regulation of cell communication                                                    | FGF19, IL6, CCL2, PTGS2, SLC20A1, MALT1, CD40, BIRC2, HHEX, REL, PLK2, LANCL2, ABRA, THBS1                                                                                 | 14 | 8.69565217 | 3.16E-05 | 0.05279643 |
| GO:0032570~response to progesterone stimulus                                                            | FOS, CCL2, SOCS3, THBS1, FOSL1                                                                                                                                             | 5  | 3.10559006 | 4.42E-05 | 0.07394669 |
| GO:0009719~response to endogenous stimulus                                                              | IL6, CCL2, PTGS2, SOCS3, CRYAB, IL1RN, NR4A2, BIRC2, FOS, CDKN1A, DUSP1, BTG2, PTPN1, THBS1, FOSL1                                                                         | 15 | 9.31677019 | 6.69E-05 | 0.11183924 |
| GO:0009628~response to abiotic stimulus                                                                 | CCL2, SOCS3, CRYAB, FOS, CDKN1A, THBD, BTG2, DUSP1, KCNJ8, LRP2, DCUN1D3, THBS1, FOSL1, MYC                                                                                | 14 | 8.69565217 | 9.92E-05 | 0.16567463 |

|                                                                        |                                                                                                                                   |    |            |          |            |
|------------------------------------------------------------------------|-----------------------------------------------------------------------------------------------------------------------------------|----|------------|----------|------------|
| GO:0007243~protein kinase cascade                                      | CCL2, SOCS3, CRYAB, MAP2K3, NFKBIB, DUSP10, STK17B, NFKBIA, MALT1, TRIB1, STAT4, DUSP16, THBS1, STK38L                            | 14 | 8.69565217 | 1.05E-04 | 0.17491221 |
| GO:0006357~regulation of transcription from RNA polymerase II promoter | EGR1, KLF6, IL6, NR4A2, LMCD1, NFKBIA, NR4A1, NFKB1, FOSB, PLAGL1, HDAC4, FOS, HHEX, MEIS2, TEAD4, IRF1, ABRA, NFATC2, FOSL1, MYC | 20 | 12.4223603 | 1.45E-04 | 0.24251693 |
| GO:0009967~positive regulation of signal transduction                  | FGF19, HHEX, IL6, PLK2, REL, SLC20A1, LANCL2, ABRA, MALT1, CD40, THBS1, BIRC2                                                     | 12 | 7.45341615 | 2.18E-04 | 0.36305116 |
| GO:0014070~response to organic cyclic substance                        | FOS, CDKN1A, PTGS2, PLIN2, BTG2, SOCS3, BIRC2, FOSL1                                                                              | 8  | 4.9689441  | 2.37E-04 | 0.3955129  |
| GO:0008284~positive regulation of cell proliferation                   | KLF5, NAMPT, IL6, CCL2, PTGS2, MARCKSL1, CD40, VCAM1, HDAC4, CDKN1A, HBEGF, FOSL1, MYC, SERTAD1                                   | 14 | 8.69565217 | 3.15E-04 | 0.52583047 |
| GO:0009725~response to hormone stimulus                                | IL6, CCL2, PTGS2, SOCS3, CRYAB, IL1RN, FOS, CDKN1A, BTG2, DUSP1, PTPN1, THBS1, FOSL1                                              | 13 | 8.07453416 | 3.75E-04 | 0.62588376 |
| GO:0010243~response to organic nitrogen                                | CDKN1A, CCL2, PTGS2, BTG2, NR4A2, BIRC2                                                                                           | 6  | 3.72670808 | 4.49E-04 | 0.74832714 |
| GO:0070482~response to oxygen levels                                   | HMOX2, CDKN1A, CCL2, SOCS3, NR4A2, THBS1, BIRC2, ANGPTL4                                                                          | 8  | 4.9689441  | 5.99E-04 | 0.9964909  |
| GO:0051090~regulation of transcription factor activity                 | ICAM1, HDAC4, IL6, NFKBIA, ABRA, MALT1, TRIB1                                                                                     | 7  | 4.34782609 | 6.43E-04 | 1.06892347 |
| GO:0001775~cell activation                                             | EGR1, VCAM1, ICAM1, HDAC4, SHB, KLF6, IL6, IRF1, MALT1, NFKB2, CD40                                                               | 11 | 6.83229814 | 7.17E-04 | 1.19155876 |
| GO:0051789~response to protein stimulus                                | EGR1, FOS, DNAA1, NR4A2, DNAB1, HSPA8, CYR61                                                                                      | 7  | 4.34782609 | 7.86E-04 | 1.30549949 |
| GO:0043122~regulation of I-kappaB kinase/NF-kappaB cascade             | PLK2, REL, SLC20A1, MALT1, CD40, TNFAIP3, BIRC2                                                                                   | 7  | 4.34782609 | 7.86E-04 | 1.30549949 |
| GO:0051591~response to cAMP                                            | FOS, THBD, DUSP1, BIRC2, FOSL1                                                                                                    | 5  | 3.10559006 | 8.59E-04 | 1.42666915 |
| GO:0044093~positive regulation of molecular function                   | ICAM1, IL6, MAP2K3, CYCS, NR4A2, MALT1, SDC4, HOMER1, GCH1, HDAC4, EDNRB, NDEL1, ABRA, THBS1, SELE, MYC                           | 16 | 9.9378882  | 9.37E-04 | 1.55597463 |
| GO:0050867~positive regulation of cell activation                      | VCAM1, SELP, CDKN1A, IL6, MALT1, CD40, THBS1                                                                                      | 7  | 4.34782609 | 9.52E-04 | 1.58019924 |
| GO:0046649~lymphocyte activation                                       | EGR1, VCAM1, ICAM1, HDAC4, SHB, KLF6, IRF1, MALT1, CD40                                                                           | 9  | 5.59006211 | 9.89E-04 | 1.64130302 |

## Cluster II

| Primary Proc | Term                                                       | Genes                                                                                                                                                    | Count | %          | PValue     | FDR        |
|--------------|------------------------------------------------------------|----------------------------------------------------------------------------------------------------------------------------------------------------------|-------|------------|------------|------------|
|              | GO:0022613~ribonucleoprotein complex biogenesis            | EIF6, GTPBP4, NIP7, BYSL, FBL, MRTO4, RCL1, NOP2, DKC1, PRMT5, WDR77, NOP58, ZNHIT6, IMP4, FTSJ3                                                         | 15    | 7.31707317 | 3.82E-08   | 6.36E-05   |
|              | GO:0042254~ribosome biogenesis                             | EIF6, RCL1, GTPBP4, NOP2, DKC1, NIP7, BYSL, NOP58, IMP4, FBL, FTSJ3, MRTO4                                                                               | 12    | 5.85365854 | 2.61E-07   | 4.35E-04   |
|              | GO:0006396~RNA processing                                  | RPL36A, MAGOH, CWC15, POLR2D, PRPF4, PUS7, TRMT61B, FBL, HNRPD, DDX39, NOP2, DKC1, METTL1, TRMT6, PRMT5, WDR77, NOP58, PPIL3, RPL10A, RBM28, IMP4, FTSJ3 | 22    | 10.7317073 | 2.84E-06   | 0.00473734 |
|              | GO:0034660~ncRNA metabolic process                         | NOP2, DKC1, TRMT6, METTL1, MAEL, NOP58, MKI67IP, IMP4, PUS7, FBL, TRMT61B, FTSJ3                                                                         | 12    | 5.85365854 | 1.13E-04   | 0.18874753 |
|              | GO:0034470~ncRNA processing                                | NOP2, DKC1, TRMT6, METTL1, NOP58, IMP4, PUS7, FBL, TRMT61B, FTSJ3                                                                                        | 10    | 4.87804878 | 4.57E-04   | 0.75949461 |
|              | GO:0016072~rRNA metabolic process                          | NOP2, DKC1, NOP58, MKI67IP, IMP4, FBL, FTSJ3                                                                                                             | 7     | 3.41463415 | 0.00109257 | 1.80506122 |
| Related Proc | GO:0006412~translation                                     | EIF6, RPL36A, EIF3B, PTRH1, TRMT6, EEF1E1, RPL7L1, EIF4A1, MRPS10, RPL10A, RPL22L1, MRPL35                                                               | 12    | 5.85365854 | 0.00235385 | 3.85074027 |
|              | GO:0000375~RNA splicing, via transesterification reactions | DDX39, RPL36A, PRMT5, MAGOH, CWC15, WDR77, POLR2D, PRPF4                                                                                                 | 8     | 3.90243902 | 0.00259858 | 4.24301053 |



|                                                                                                |                                                                        |    |            |            |            |
|------------------------------------------------------------------------------------------------|------------------------------------------------------------------------|----|------------|------------|------------|
| GO:000398~nuclear mRNA splicing, via spliceosome                                               | DDX39, RPL36A, PRMT5, MAGOH, CWC15, WDR77, POLR2D, PRPF4               | 8  | 3.90243902 | 0.00259858 | 4.24301053 |
| GO:000377~RNA splicing, via transesterification reactions with bulged adenosine as nucleophile | DDX39, RPL36A, PRMT5, MAGOH, CWC15, WDR77, POLR2D, PRPF4               | 8  | 3.90243902 | 0.00259858 | 4.24301053 |
| GO:0009451~RNA modification                                                                    | DKC1, METTL1, PUS7, TRMT61B, FTSJ3                                     | 5  | 2.43902439 | 0.00267535 | 4.3657565  |
| GO:0006364~rRNA processing                                                                     | NOP2, DKC1, NOP58, IMP4, FBL, FTSJ3                                    | 6  | 2.92682927 | 0.00519049 | 8.30610929 |
| GO:0008380~RNA splicing                                                                        | DDX39, RPL36A, PRMT5, MAGOH, CWC15, WDR77, PPIL3, POLR2D, RBM28, PRPF4 | 10 | 4.87804878 | 0.00780393 | 12.2384864 |

### Cluster III

| Primary Proc | Term                                                 | Genes                                                                     | Count | %          | PValue     | FDR        |
|--------------|------------------------------------------------------|---------------------------------------------------------------------------|-------|------------|------------|------------|
|              | GO:0006399~tRNA metabolic process                    | YARS, ELAC2, PUS1, GARS, QTRT1, VARS, TSEN2, MARS                         | 8     | 7.07964602 | 1.42E-05   | 0.02239822 |
|              | GO:0009116~nucleoside metabolic process              | NME1, ADK, NT5C3, QTRT1, TPMT                                             | 5     | 4.42477876 | 8.95E-04   | 1.40216712 |
| Related Proc | GO:0034660~ncRNA metabolic process                   | YARS, ELAC2, PUS1, GARS, QTRT1, VARS, TSEN2, MARS                         | 8     | 7.07964602 | 9.04E-04   | 1.41652659 |
|              | GO:0044271~nitrogen compound biosynthetic process    | TCIRG1, NME1, ADK, SLC25A38, RSAD1, ASNS, ENOPH1, QTRT1, SMS              | 9     | 7.96460177 | 0.00153366 | 2.39249423 |
|              | GO:0044093~positive regulation of molecular function | UBE2N, MYD88, MAPKSP1, NME1, HTR7, PLCG2, KITLG, LRP8, DPH3, PLCB2, ADAM9 | 11    | 9.73451327 | 0.00590763 | 8.92470746 |

### Cluster IV

| Primary Proc | Term                                           | Genes                                                                                                                                                                                                     | Count | %          | PValue   | FDR        |
|--------------|------------------------------------------------|-----------------------------------------------------------------------------------------------------------------------------------------------------------------------------------------------------------|-------|------------|----------|------------|
|              | GO:0006954~inflammatory response               | ITGAL, IL18RAP, OLR1, S100A9, C4BPB, CFP, CCL20, CCR3, AOA, IL1RAP, IL1B, SERPINA1, CLEC7A, IL1A                                                                                                          | 14    | 8.1871345  | 3.00E-05 | 0.04890493 |
|              | GO:0030595~leukocyte chemotaxis                | CORO1A, S100A9, IL1B, ITGAM, SYK                                                                                                                                                                          | 5     | 2.92397661 | 5.42E-04 | 0.87908483 |
|              | GO:0006955~immune response                     | ITGAL, AQP9, GPSM3, NCF1C, LY9, LIF, CFP, CCL20, IL1RAP, LTF, IL1B, IL2RG, CLEC4D, IL1A, IL18R1, IL18RAP, OLR1, NCF2, NCF4, IL1RL2, C4BPB, VAV1, CORO1A, IL18BP, PPBP, LILRB3, VEGFA, CLEC7A, TREM1, LCP2 | 30    | 17.5438597 | 6.20E-11 | 1.01E-07   |
| Related Proc | GO:0006952~defense response                    | ITGAL, S100A9, NCF1C, CFP, CCL20, AOA, IL1RAP, LTF, IL1B, CSF3R, SERPINA1, IL1A, IL18R1, IL18RAP, NCF2, OLR1, IL1RL2, HCK, C4BPB, INHBA, CORO1A, PPBP, LILRB3, CCR3, CLEC7A                               | 25    | 14.619883  | 1.50E-08 | 2.45E-05   |
|              | GO:0042330~taxis                               | CCRL2, CORO1A, PPBP, CCL20, RALBP1, CCR3, S100A9, IL1B, FGF10, ITGAM, SYK                                                                                                                                 | 11    | 6.43274854 | 5.82E-06 | 0.00948284 |
|              | GO:0006935~chemotaxis                          | CCRL2, CORO1A, PPBP, CCL20, RALBP1, CCR3, S100A9, IL1B, FGF10, ITGAM, SYK                                                                                                                                 | 11    | 6.43274854 | 5.82E-06 | 0.00948284 |
|              | GO:0045087~innate immune response              | CFP, IL18R1, CORO1A, IL18RAP, NCF2, IL1RL2, IL1RAP, NCF1C, C4BPB, CLEC7A                                                                                                                                  | 10    | 5.84795322 | 1.23E-05 | 0.02002625 |
|              | GO:0007626~locomotory behavior                 | RALBP1, S100A9, FGF10, CACNB4, ITGAM, CCRL2, CORO1A, CCL20, PPBP, CCR3, SLC18A2, IL1B, SYK                                                                                                                | 13    | 7.60233918 | 2.54E-05 | 0.04142546 |
|              | GO:0009611~response to wounding                | PTPN6, ITGAL, IL18RAP, PLEK, OLR1, S100A9, FGF10, C4BPB, CFP, CCL20, AOA, CCR3, IL1RAP, SERPINB2, IL1B, SERPINA1, CLEC7A, IL1A                                                                            | 18    | 10.5263158 | 3.05E-05 | 0.04962044 |
|              | GO:0007229~integrin-mediated signaling pathway | ITGAL, PLEK, PRAM1, ITGB7, VAV1, ITGAM, SYK                                                                                                                                                               | 7     | 4.09356725 | 8.07E-05 | 0.13139977 |

|                                                             |                                                                                                                                                                                                                                            |    |            |            |            |
|-------------------------------------------------------------|--------------------------------------------------------------------------------------------------------------------------------------------------------------------------------------------------------------------------------------------|----|------------|------------|------------|
| GO:0060326~cell chemotaxis                                  | CORO1A, S100A9, IL1B, ITGAM, SYK                                                                                                                                                                                                           | 5  | 2.92397661 | 6.64E-04   | 1.07653676 |
| GO:0001775~cell activation                                  | ITGAL, PLEK, PREX1, PTPN22, TREML2, CLEC7A, TPD52, VAV1, ITGAM, LCP2, SYK                                                                                                                                                                  | 11 | 6.43274854 | 7.58E-04   | 1.22792834 |
| GO:0002684~positive regulation of immune system process     | CFP, CORO1A, VEGFA, PTPN22, IL1B, C4BPB, IL2RG, CACNB4, CLEC7A, SYK                                                                                                                                                                        | 10 | 5.84795322 | 7.84E-04   | 1.26886637 |
| GO:0045321~leukocyte activation                             | ITGAL, PREX1, PTPN22, TREML2, CLEC7A, TPD52, VAV1, ITGAM, LCP2, SYK                                                                                                                                                                        | 10 | 5.84795322 | 8.82E-04   | 1.42687384 |
| GO:0007166~cell surface receptor linked signal transduction | VIP, ITGAL, IFITM1, FFAR2, FST, PTPN22, FGF10, CACNB4, ITGAM, LIF, CCRL2, CCL20, ITGB7, CDA, SYK, PIK3CG, PTPN6, IL18RAP, PLEK, GPR171, AREGB, VAV1, INHBA, P2RY13, PPBP, EMR1, CCR3, LILRB3, PRAM1, VEGFA, EMR3, AREG, CLEC7A, EMR2, LCP2 | 34 | 19.8830409 | 9.58E-04   | 1.54990673 |
| GO:0042110~T cell activation                                | ITGAL, PTPN22, TREML2, CLEC7A, VAV1, ITGAM, SYK                                                                                                                                                                                            | 7  | 4.09356725 | 0.00189753 | 3.04697029 |
| GO:0007155~cell adhesion                                    | C1ORF38, ITGAL, PLEK, OLR1, SIGLEC10, LY9, ITGAM, CORO1A, LAMB3, EMR1, CCR3, ITGB7, CSF3R, CLEC7A, AMICA1, SYK, ALX1                                                                                                                       | 17 | 9.94152047 | 0.00221498 | 3.54813005 |
| GO:0022610~biological adhesion                              | C1ORF38, ITGAL, PLEK, OLR1, SIGLEC10, LY9, ITGAM, CORO1A, LAMB3, EMR1, CCR3, ITGB7, CSF3R, CLEC7A, AMICA1, SYK, ALX1                                                                                                                       | 17 | 9.94152047 | 0.00224697 | 3.59848876 |
| GO:0050900~leukocyte migration                              | CORO1A, S100A9, IL1B, ITGAM, SYK                                                                                                                                                                                                           | 5  | 2.92397661 | 0.00276595 | 4.41216402 |
| GO:0002253~activation of immune response                    | CFP, PTPN22, C4BPB, CACNB4, CLEC7A, SYK                                                                                                                                                                                                    | 6  | 3.50877193 | 0.00281395 | 4.48709287 |
| GO:0048584~positive regulation of response to stimulus      | CFP, VEGFA, PTPN22, IL1B, FGF10, C4BPB, CACNB4, CLEC7A, SYK                                                                                                                                                                                | 9  | 5.2631579  | 0.0030256  | 4.8168407  |
| GO:0007610~behavior                                         | RALBP1, S100A9, FGF10, CACNB4, ITGAM, CCRL2, CORO1A, CCL20, PPBP, CCR3, SLC18A2, IL1B, SYK                                                                                                                                                 | 13 | 7.60233918 | 0.00325759 | 5.17703507 |
| GO:0050778~positive regulation of immune response           | CFP, PTPN22, IL1B, C4BPB, CACNB4, CLEC7A, SYK                                                                                                                                                                                              | 7  | 4.09356725 | 0.00383039 | 6.0609122  |
| GO:0046649~lymphocyte activation                            | ITGAL, PTPN22, TREML2, CLEC7A, TPD52, VAV1, ITGAM, SYK                                                                                                                                                                                     | 8  | 4.67836257 | 0.00447055 | 7.03959297 |

#### Cluster V

| Primary Proc Term                                                                                                                                  | Genes                                                                            | Count | %          | PValue     | FDR        |
|----------------------------------------------------------------------------------------------------------------------------------------------------|----------------------------------------------------------------------------------|-------|------------|------------|------------|
| GO:0007017~microtubule-based process                                                                                                               | DNAH11, TUBB, DYNLL1, TUBB2C, TUBD1, TUBA4A, FBXO5, NDC80, KPNA2                 | 9     | 8.57142857 | 2.56E-04   | 0.39998269 |
| GO:0051258~protein polymerization                                                                                                                  | TUBB, TUBB2C, TUBD1, TUBA4A, FBXO5                                               | 5     | 4.76190476 | 2.96E-04   | 0.46157181 |
| GO:0002822~regulation of adaptive immune response based on somatic recombination of immune receptors built from immunoglobulin superfamily domains | CD86, IL27RA, IL7R, DPP4, B2M                                                    | 5     | 4.76190476 | 4.62E-04   | 0.7201387  |
| GO:0002819~regulation of adaptive immune response                                                                                                  | CD86, IL27RA, IL7R, DPP4, B2M                                                    | 5     | 4.76190476 | 4.95E-04   | 0.77147907 |
| GO:0000278~mitotic cell cycle                                                                                                                      | CDC7, BCAT1, TUBB, PSME2, NCAPG2, TPX2, FBXO5, NDC80, KPNA2, PSMB8               | 10    | 9.52380952 | 7.18E-04   | 1.1174803  |
| GO:0051052~regulation of DNA metabolic process                                                                                                     | IL27RA, S100A11, PDGFRA, PCNA, IL7R, KPNA2                                       | 6     | 5.71428571 | 9.20E-04   | 1.42876731 |
| GO:0022402~cell cycle process                                                                                                                      | CDC7, BCAT1, TUBB, PSME2, NCAPG2, TPX2, FBXO5, NDC80, KPNA2, PSMB8, TRIP13       | 11    | 10.4761905 | 0.00390912 | 5.94055509 |
| GO:0022403~cell cycle phase                                                                                                                        | CDC7, BCAT1, TUBB, NCAPG2, TPX2, FBXO5, NDC80, KPNA2, TRIP13                     | 9     | 8.57142857 | 0.00584996 | 8.76570817 |
| GO:0006461~protein complex assembly                                                                                                                | TUBB, RRM2, TUBB2C, RRM1, CAPG, TUBD1, TUBA4A, GJA1, FBXO5, OLFM1                | 10    | 9.52380952 | 0.00589806 | 8.83470827 |
| GO:0070271~protein complex biogenesis                                                                                                              | TUBB, RRM2, TUBB2C, RRM1, CAPG, TUBD1, TUBA4A, GJA1, FBXO5, OLFM1                | 10    | 9.52380952 | 0.00589806 | 8.83470827 |
| GO:0007018~microtubule-based movement                                                                                                              | DNAH11, TUBB, TUBB2C, TUBD1, TUBA4A                                              | 5     | 4.76190476 | 0.00653716 | 9.74682825 |
| GO:0043933~macromolecular complex subunit organization                                                                                             | TUBB, RRM2, TUBB2C, RRM1, CAPG, H2AFZ, TUBD1, TUBA4A, GJA1, FBXO5, SCARB1, OLFM1 | 12    | 11.4285714 | 0.00673567 | 10.0284016 |
| GO:0006952~defense response                                                                                                                        | BPI, CYBB, TUBB, IL27RA, LY86, TUBB2C, MNDA, CLIC1, MX2, HLA-DRA, SPP1           | 11    | 10.4761905 | 0.00703059 | 10.4452065 |

|                                 |                                                                   |    |            |            |            |
|---------------------------------|-------------------------------------------------------------------|----|------------|------------|------------|
| GO:0009611~response to wounding | PLAT, CYBB, ACVRL1, FBLN5, LY86, PDGFRA, VCAN, SCARB1, CTSB, SPP1 | 10 | 9.52380952 | 0.00800189 | 11.8051737 |
|---------------------------------|-------------------------------------------------------------------|----|------------|------------|------------|

**Cluster VI**

| Primary Proc | Term                                                                                                                                                        | Genes                                                                                                                                                                    | Count | %          | PValue   | FDR        |
|--------------|-------------------------------------------------------------------------------------------------------------------------------------------------------------|--------------------------------------------------------------------------------------------------------------------------------------------------------------------------|-------|------------|----------|------------|
| Related Proc | GO:0006955~immune response                                                                                                                                  | FYB, PSMB10, PTPRC, SP100, LYN, IL18, TLR1, GPR65, TLR2, CD180, SLC11A1, TMEM173, CXCL14, CLEC4E, NUDCD1, CXCR4, FCGR1A, IL12A, FCER1G, CLEC5A, LCP1, CD14, RAB27A, GBP1 | 24    | 17.9104478 | 4.14E-10 | 6.78E-07   |
|              | GO:0045321~leukocyte activation                                                                                                                             | PTPRC, GIMAP5, LYN, TLR1, TLR2, SKAP2, CD48, SLC11A1, DOCK2, CD80, CXCR4, LCP1, RAB27A                                                                                   | 13    | 9.70149254 | 1.52E-07 | 2.49E-04   |
|              | GO:0006952~defense response                                                                                                                                 | PTPRC, ADORA3, SP100, LYN, AIF1, TLR1, TLR2, CD180, CD48, SLC11A1, TMEM173, CXCR4, FCGR1A, IL12A, PLA2G7, CLEC5A, CD14, RAB27A, TYROBP                                   | 19    | 14.1791045 | 3.13E-07 | 5.13E-04   |
|              | GO:0001775~cell activation                                                                                                                                  | PTPRC, GIMAP5, LYN, TLR1, TLR2, SKAP2, CD48, SLC11A1, DOCK2, CD80, CXCR4, LCP1, RAB27A                                                                                   | 13    | 9.70149254 | 9.45E-07 | 0.00154951 |
|              | GO:0042110~T cell activation                                                                                                                                | CD48, SLC11A1, PTPRC, DOCK2, GIMAP5, CD80, CXCR4, LCP1, RAB27A                                                                                                           | 9     | 6.71641791 | 3.27E-06 | 0.00536646 |
|              | GO:0046649~lymphocyte activation                                                                                                                            | CD48, SLC11A1, PTPRC, DOCK2, GIMAP5, CD80, CXCR4, SKAP2, LCP1, RAB27A                                                                                                    | 10    | 7.46268657 | 1.26E-05 | 0.02064852 |
|              | GO:0002274~myeloid leukocyte activation                                                                                                                     | CD48, SLC11A1, GIMAP5, LYN, TLR1, TLR2                                                                                                                                   | 6     | 4.47761194 | 1.86E-05 | 0.03042426 |
|              | GO:0001819~positive regulation of cytokine production                                                                                                       | SLC11A1, GIMAP5, IL18, TLR2, IL12A, FCER1G, CD14                                                                                                                         | 7     | 5.2238806  | 4.46E-05 | 0.07305091 |
|              | GO:0002822~regulation of adaptive immune response based on somatic recombination of immune receptors built from immunoglobulin superfamily domains          | SLC11A1, PTPRC, GIMAP5, CD80, IL12A, FCER1G                                                                                                                              | 6     | 4.47761194 | 4.48E-05 | 0.07336351 |
|              | GO:0001817~regulation of cytokine production                                                                                                                | SLC11A1, GIMAP5, CD80, IL18, TLR1, TLR2, IL12A, FCER1G, CD14                                                                                                             | 9     | 6.71641791 | 4.61E-05 | 0.07559009 |
|              | GO:0002819~regulation of adaptive immune response                                                                                                           | SLC11A1, PTPRC, GIMAP5, CD80, IL12A, FCER1G                                                                                                                              | 6     | 4.47761194 | 4.89E-05 | 0.08009918 |
|              | GO:0002824~positive regulation of adaptive immune response based on somatic recombination of immune receptors built from immunoglobulin superfamily domains | SLC11A1, PTPRC, GIMAP5, IL12A, FCER1G                                                                                                                                    | 5     | 3.73134328 | 5.90E-05 | 0.09670491 |
|              | GO:0045087~innate immune response                                                                                                                           | SLC11A1, TMEM173, SP100, FCGR1A, TLR1, TLR2, CD180, RAB27A                                                                                                               | 8     | 5.97014925 | 5.90E-05 | 0.09678765 |
|              | GO:0002821~positive regulation of adaptive immune response                                                                                                  | SLC11A1, PTPRC, GIMAP5, IL12A, FCER1G                                                                                                                                    | 5     | 3.73134328 | 6.74E-05 | 0.11041638 |
|              | GO:0002366~leukocyte activation during immune response                                                                                                      | SLC11A1, LYN, TLR2, LCP1, RAB27A                                                                                                                                         | 5     | 3.73134328 | 1.23E-04 | 0.20102704 |
|              | GO:0002263~cell activation during immune response                                                                                                           | SLC11A1, LYN, TLR2, LCP1, RAB27A                                                                                                                                         | 5     | 3.73134328 | 1.23E-04 | 0.20102704 |
|              | GO:0002684~positive regulation of immune system process                                                                                                     | SLC11A1, PTPRC, GIMAP5, CD80, LYN, IL18, TLR2, IL12A, FCER1G                                                                                                             | 9     | 6.71641791 | 3.07E-04 | 0.50174854 |
|              | GO:0051240~positive regulation of multicellular organismal process                                                                                          | SLC11A1, PLA2G4A, GIMAP5, IL18, TLR2, IL12A, FCER1G, CA2, CD14                                                                                                           | 9     | 6.71641791 | 3.62E-04 | 0.59273258 |
|              | GO:0006954~inflammatory response                                                                                                                            | SLC11A1, ADORA3, LYN, AIF1, CXCR4, TLR1, TLR2, PLA2G7, CD180, CD14                                                                                                       | 10    | 7.46268657 | 5.34E-04 | 0.87140994 |

|                                                         |                                                                                        |    |            |            |            |
|---------------------------------------------------------|----------------------------------------------------------------------------------------|----|------------|------------|------------|
| GO:0050778~positive regulation of immune response       | SLC11A1, PTPRC, GIMAP5, LYN, TLR2, IL12A, FCER1G                                       | 7  | 5.2238806  | 6.07E-04   | 0.99020974 |
| GO:0007243~protein kinase cascade                       | FYB, PTPRC, GRB2, CXCR4, NLK, TLR1, TLR2, STK17A, BTK, DUSP6                           | 10 | 7.46268657 | 0.00133468 | 2.16639754 |
| GO:0032844~regulation of homeostatic process            | PTPRC, PLA2G4A, GIMAP5, LMO2, LYN, CA2                                                 | 6  | 4.47761194 | 0.00135426 | 2.19785736 |
| GO:0009611~response to wounding                         | SLC11A1, ADORA3, LYN, AIF1, CXCR4, TLR1, TLR2, PLA2G7, TFPI2, CD180, CD14, RAB27A      | 12 | 8.95522388 | 0.00142073 | 2.30455542 |
| GO:0030097~hemopoiesis                                  | SGPL1, PTPRC, DOCK2, GIMAP5, LMO2, LYN, CASP8, TACC3                                   | 8  | 5.97014925 | 0.00152656 | 2.47420135 |
| GO:0048584~positive regulation of response to stimulus  | SLC11A1, PTPRC, PLA2G4A, GIMAP5, LYN, TLR2, IL12A, FCER1G                              | 8  | 5.97014925 | 0.00152656 | 2.47420135 |
| GO:0031349~positive regulation of defense response      | PLA2G4A, GIMAP5, TLR2, IL12A, FCER1G                                                   | 5  | 3.73134328 | 0.00185199 | 2.99417328 |
| GO:0050870~positive regulation of T cell activation     | PTPRC, GIMAP5, CD80, IL18, IL12A                                                       | 5  | 3.73134328 | 0.00214764 | 3.46428549 |
| GO:0048534~hemopoietic or lymphoid organ development    | SGPL1, PTPRC, DOCK2, GIMAP5, LMO2, LYN, CASP8, TACC3                                   | 8  | 5.97014925 | 0.0026395  | 4.24167752 |
| GO:0006468~protein amino acid phosphorylation           | FYB, PTPRC, LIMK2, LYN, NLK, PIK3CD, STK17A, PRKCB, BTK, PLK3, GMFG, CXCR4, KALRN      | 13 | 9.70149254 | 0.00286047 | 4.58900599 |
| GO:0002237~response to molecule of bacterial origin     | SLC11A1, PLA2G4A, TLR2, IL12A, CD14                                                    | 5  | 3.73134328 | 0.00336653 | 5.37998779 |
| GO:0002520~immune system development                    | SGPL1, PTPRC, DOCK2, GIMAP5, LMO2, LYN, CASP8, TACC3                                   | 8  | 5.97014925 | 0.00367301 | 5.8560279  |
| GO:0043065~positive regulation of apoptosis             | PTPRC, PLA2G4A, CASP4, CASP8, TLR2, IL12A, STK17A, RAB27A, BTK, KALRN                  | 10 | 7.46268657 | 0.00368226 | 5.87035608 |
| GO:0006915~apoptosis                                    | SGPL1, RNF144B, TMEM173, CASP4, LITAF, CXCR4, CASP8, GPR65, STK17A, DRAM1, CD14, KALRN | 12 | 8.95522388 | 0.00382149 | 6.08584671 |
| GO:0043068~positive regulation of programmed cell death | PTPRC, PLA2G4A, CASP4, CASP8, TLR2, IL12A, STK17A, RAB27A, BTK, KALRN                  | 10 | 7.46268657 | 0.00385406 | 6.13618968 |
| GO:0010942~positive regulation of cell death            | PTPRC, PLA2G4A, CASP4, CASP8, TLR2, IL12A, STK17A, RAB27A, BTK, KALRN                  | 10 | 7.46268657 | 0.00397206 | 6.31835898 |
| GO:0012501~programmed cell death                        | SGPL1, RNF144B, TMEM173, CASP4, LITAF, CXCR4, CASP8, GPR65, STK17A, DRAM1, CD14, KALRN | 12 | 8.95522388 | 0.00427257 | 6.78078515 |

#### Cluster VII

| Primary Proc Term                   | Genes                                                                                                                                                                                                                                                              | Count | %          | PValue   | FDR        |
|-------------------------------------|--------------------------------------------------------------------------------------------------------------------------------------------------------------------------------------------------------------------------------------------------------------------|-------|------------|----------|------------|
| GO:0007067~mitosis                  | KIF23, KIFC1, NEK2, ANLN, AURKA, PTTG1, SPC25, NCAPH, NCAPG, CDCA2, CCNA2, HELLS, ASPM, ERCC6L, CDCA3, CDC6, KIF11, DLGAP5, KIF15, NUF2, KIF18A, CENPF, NUSAP1, CDC20, BIRC5, PBK, UBE2C, SMC2, NCAPD2, CDC25B, CCNB1, MAD2L1, CCNB2, SPAG5, PLK1, BUB1B, C21ORF45 | 37    | 19.2708333 | 2.42E-31 | 3.97E-28   |
| GO:0007059~chromosome segregation   | CENPO, KIFC1, NEK2, DLGAP5, NUF2, KIF18A, CENPF, NUSAP1, BIRC5, PTTG1, SMC2, CENPH, NCAPD2, SPC25, NCAPH, MAD2L1, NCAPG, TOP2A                                                                                                                                     | 18    | 9.375      | 4.23E-17 | 6.93E-14   |
| GO:0000910~cytokinesis              | PRC1, PLK1, NUSAP1, BIRC5, ANLN, MYH9, RACGAP1                                                                                                                                                                                                                     | 7     | 3.64583333 | 7.68E-06 | 0.01257355 |
| GO:0051726~regulation of cell cycle | CDC6, NEK2, DLGAP5, HERC5, CENPF, NUSAP1, TTK, ANLN, BIRC5, CHEK2, UBE2C, CDKN3, CCNB1, PLK4, MAD2L1, BUB1B, CCNA2                                                                                                                                                 | 17    | 8.85416667 | 1.77E-06 | 0.00290096 |

|              |                                                                                                           |                                                                                                                                                                                                                                                                                                                                                                                                      |    |            |            |            |
|--------------|-----------------------------------------------------------------------------------------------------------|------------------------------------------------------------------------------------------------------------------------------------------------------------------------------------------------------------------------------------------------------------------------------------------------------------------------------------------------------------------------------------------------------|----|------------|------------|------------|
| Related Proc | GO:0022402~cell cycle process                                                                             | KIF23, KIFC1, PRC1, TTK, AURKA, PTTG1, CDCA2, CCNA2, ASPM, CDCA3, CDC6, KIF11, KIF15, NUSAP1, PBK, MYH9, UBE2C, RAD51, NCAPD2, SASS6, MAD2L1, FANCD2, SPAG5, BUB1B, STMN1, NEK2, ANLN, SPC25, NCAPH, NCAPG, HELLS, ERCC6L, EXO1, DLGAP5, NUF2, KIF18A, CENPF, BIRC5, CDC20, CDKN3, RACGAP1, SMC2, SC65, PSMB9, CDC25B, CCNB1, CCNB2, PLK1, C21ORF45, TP53INP1                                        | 50 | 26.0416667 | 1.38E-29   | 2.25E-26   |
|              | GO:0000279~M phase                                                                                        | KIF23, KIFC1, PRC1, NEK2, TTK, ANLN, AURKA, PTTG1, SPC25, NCAPH, NCAPG, CDCA2, CCNA2, ASPM, HELLS, ERCC6L, CDCA3, EXO1, CDC6, KIF11, DLGAP5, KIF15, NUF2, KIF18A, CENPF, NUSAP1, CDC20, BIRC5, PBK, MYH9, UBE2C, SMC2, SC65, NCAPD2, CDC25B, RAD51, CCNB1, MAD2L1, CCNB2, FANCD2, SPAG5, PLK1, BUB1B, C21ORF45, STMN1                                                                                | 45 | 23.4375    | 1.63E-34   | 2.67E-31   |
|              | GO:0000087~M phase of mitotic cell cycle                                                                  | KIF23, KIFC1, NEK2, ANLN, AURKA, PTTG1, SPC25, NCAPH, NCAPG, CDCA2, CCNA2, HELLS, ASPM, ERCC6L, CDCA3, CDC6, KIF11, DLGAP5, KIF15, NUF2, KIF18A, CENPF, NUSAP1, CDC20, BIRC5, PBK, UBE2C, SMC2, NCAPD2, CDC25B, CCNB1, MAD2L1, CCNB2, SPAG5, PLK1, BUB1B, C21ORF45                                                                                                                                   | 37 | 19.2708333 | 4.73E-31   | 7.74E-28   |
|              | GO:0048285~organelle fission                                                                              | KIF23, KIFC1, NEK2, ANLN, AURKA, PTTG1, SPC25, NCAPH, NCAPG, CDCA2, CCNA2, HELLS, ASPM, ERCC6L, CDCA3, CDC6, KIF11, DLGAP5, KIF15, NUF2, KIF18A, CENPF, NUSAP1, CDC20, BIRC5, PBK, UBE2C, SMC2, NCAPD2, CDC25B, CCNB1, MAD2L1, CCNB2, SPAG5, PLK1, BUB1B, C21ORF45                                                                                                                                   | 37 | 19.2708333 | 1.07E-30   | 1.75E-27   |
|              | GO:0007049~cell cycle                                                                                     | KIF23, KIFC1, PRC1, E2F8, TTK, AURKA, PTTG1, CDCA2, CCNA2, ASPM, CDCA3, CDC6, KIF11, KIF15, NUSAP1, PBK, MYH9, UBE2C, ESCO2, NCAPD2, RAD51, MCM6, SASS6, MAD2L1, FANCD2, SPAG5, BUB1B, STMN1, NEK2, FOXM1, ANLN, CHEK2, SPC25, NCAPH, NCAPG, HELLS, ERCC6L, EXO1, DLGAP5, NUF2, KIF18A, CENPF, BIRC5, CDC20, RACGAP1, CDKN3, SMC2, GSG2, SC65, PSMB9, CDC25B, CCNB1, CCNB2, PLK1, C21ORF45, TP53INP1 | 56 | 29.1666667 | 6.02E-29   | 9.87E-26   |
|              | GO:0007076~mitotic chromosome condensation                                                                | NCAPH, NCAPG, NUSAP1, SMC2, NCAPD2                                                                                                                                                                                                                                                                                                                                                                   | 5  | 2.60416667 | 1.21E-05   | 0.01981661 |
|              | GO:0051276~chromosome organization                                                                        | KIFC1, NEK2, DLGAP5, KIF18A, CENPF, NUSAP1, PTTG1, SMC2, GSG2, SC65, CENPF, NCAPD2, NCAPH, MAD2L1, NCAPG, FANCD2, MYST1, TOP2A, HELLS                                                                                                                                                                                                                                                                | 19 | 9.89583333 | 1.58E-05   | 0.02590806 |
|              | GO:0000075~cell cycle checkpoint                                                                          | CDC6, MAD2L1, BUB1B, CENPF, TTK, BIRC5, CHEK2, CCNA2                                                                                                                                                                                                                                                                                                                                                 | 8  | 4.16666667 | 9.61E-05   | 0.15732027 |
|              | GO:0051327~M phase of meiotic cell cycle                                                                  | EXO1, NEK2, FANCD2, PLK1, MYH9, SC65, CDC25B, RAD51                                                                                                                                                                                                                                                                                                                                                  | 8  | 4.16666667 | 1.53E-04   | 0.25096862 |
|              | GO:0051439~regulation of ubiquitin-protein ligase activity during mitotic cell cycle                      | CCNB1, MAD2L1, PLK1, BUB1B, CDC20, UBE2C, PSMB9                                                                                                                                                                                                                                                                                                                                                      | 7  | 3.64583333 | 1.83E-04   | 0.29921539 |
|              | GO:0006259~DNA metabolic process                                                                          | EXO1, CDC6, CCDC88A, GEN1, NEIL3, CENPF, PTTG1, ESCO2, MCM5, RAD51, MCM6, DNA2, FANCM, FANCD2, ORC6L, TOP2A, HELLS                                                                                                                                                                                                                                                                                   | 17 | 8.85416667 | 3.05E-04   | 0.49918476 |
|              | GO:0051438~regulation of ubiquitin-protein ligase activity                                                | CCNB1, MAD2L1, PLK1, BUB1B, CDC20, UBE2C, PSMB9                                                                                                                                                                                                                                                                                                                                                      | 7  | 3.64583333 | 3.07E-04   | 0.50111519 |
|              | GO:0051340~regulation of ligase activity                                                                  | CCNB1, MAD2L1, PLK1, BUB1B, CDC20, UBE2C, PSMB9                                                                                                                                                                                                                                                                                                                                                      | 7  | 3.64583333 | 3.76E-04   | 0.61480635 |
|              | GO:0007088~regulation of mitosis                                                                          | MAD2L1, NEK2, DLGAP5, CENPF, NUSAP1, TTK                                                                                                                                                                                                                                                                                                                                                             | 6  | 3.125      | 4.96E-04   | 0.80966376 |
|              | GO:0051783~regulation of nuclear division                                                                 | MAD2L1, NEK2, DLGAP5, CENPF, NUSAP1, TTK                                                                                                                                                                                                                                                                                                                                                             | 6  | 3.125      | 4.96E-04   | 0.80966376 |
|              | GO:0051640~organelle localization                                                                         | DLGAP5, KIF18A, CENPF, NUSAP1, BIRC5, MYH9, ASPM                                                                                                                                                                                                                                                                                                                                                     | 7  | 3.64583333 | 7.44E-04   | 1.21172991 |
|              | GO:0031145~anaphase-promoting complex-dependent proteasomal ubiquitin-dependent protein catabolic process | CCNB1, MAD2L1, BUB1B, CDC20, UBE2C, PSMB9                                                                                                                                                                                                                                                                                                                                                            | 6  | 3.125      | 9.86E-04   | 1.60251399 |
|              | GO:0031396~regulation of protein ubiquitination                                                           | CCNB1, MAD2L1, PLK1, BUB1B, CDC20, UBE2C, PSMB9                                                                                                                                                                                                                                                                                                                                                      | 7  | 3.64583333 | 0.00115159 | 1.86997828 |
|              | GO:0051656~establishment of organelle localization                                                        | DLGAP5, KIF18A, CENPF, NUSAP1, BIRC5, MYH9                                                                                                                                                                                                                                                                                                                                                           | 6  | 3.125      | 0.00129156 | 2.09501527 |

|                                          |                                                             |   |            |            |            |
|------------------------------------------|-------------------------------------------------------------|---|------------|------------|------------|
| GO:0007093~mitotic cell cycle checkpoint | MAD2L1, BUB1B, CENPF, TTK, CCNA2                            | 5 | 2.60416667 | 0.00158734 | 2.56897269 |
| GO:0006260~DNA replication               | DNA2, CDC6, CCDC88A, ORC6L, CENPF, TOP2A, MCM5, MCM6, RAD51 | 9 | 4.6875     | 0.00182363 | 2.94603368 |
| GO:0007018~microtubule-based movement    | KIF23, KIF14, KIFC1, KIF11, KIF27, KIF15, KIF18A            | 7 | 3.64583333 | 0.00215479 | 3.47220079 |
| GO:0006323~DNA packaging                 | NCAPH, NCAPG, NUSAP1, TOP2A, SMC2, HELLS, NCAPD2            | 7 | 3.64583333 | 0.00256719 | 4.12370221 |

#### Cluster VIII

| Primary Clusl | Term                                            | Genes                                                                                                | Count | %          | PValue     | FDR        |
|---------------|-------------------------------------------------|------------------------------------------------------------------------------------------------------|-------|------------|------------|------------|
|               | GO:0007229~integrin-mediated signaling pathway  | COL3A1, ITGA11, ITGB5, COL16A1, ADAMDEC1, ITGBL1                                                     | 6     | 5.2631579  | 7.64E-05   | 0.11740818 |
| Related Clust | GO:0007155~cell adhesion                        | SVEP1, COL3A1, ITGA11, NLGN1, ITGB5, CERCAM, COL16A1, ITGBL1, THY1, OMD, LAMA3, MFAP4, COL8A1, SPON1 | 14    | 12.2807018 | 4.01E-04   | 0.6149094  |
|               | GO:0022610~biological adhesion                  | SVEP1, COL3A1, ITGA11, NLGN1, ITGB5, CERCAM, COL16A1, ITGBL1, THY1, OMD, LAMA3, MFAP4, COL8A1, SPON1 | 14    | 12.2807018 | 4.06E-04   | 0.62332736 |
|               | GO:0007160~cell-matrix adhesion                 | COL3A1, ITGA11, ITGB5, THY1, ITGBL1                                                                  | 5     | 4.38596491 | 0.00236221 | 3.57202894 |
|               | GO:0031589~cell-substrate adhesion              | COL3A1, ITGA11, ITGB5, THY1, ITGBL1                                                                  | 5     | 4.38596491 | 0.00334888 | 5.02841499 |
|               | GO:0043062~extracellular structure organization | RXFP1, LUM, COL3A1, NLGN1, COL1A1, LOX                                                               | 6     | 5.2631579  | 0.00360847 | 5.4081486  |
|               | GO:0030198~extracellular matrix organization    | RXFP1, LUM, COL3A1, COL1A1, LOX                                                                      | 5     | 4.38596491 | 0.00414351 | 6.18634275 |
|               | GO:0006790~sulfur metabolic process             | BGN, ENPP1, PHGDH, IDH1, GLCE                                                                        | 5     | 4.38596491 | 0.00591425 | 8.71936966 |

#### Cluster IX

| Primary Proc | Term                                                             | Genes                                                                                                            | Count | %          | PValue     | FDR        |
|--------------|------------------------------------------------------------------|------------------------------------------------------------------------------------------------------------------|-------|------------|------------|------------|
|              | GO:0003012~muscle system process                                 | ACTG2, SLMAP, EDN1, GUCY1A3, ADRA1A, TTN, KCNQ1, SGCA, DTNA                                                      | 9     | 3.96475771 | 7.32E-04   | 1.19516252 |
|              | GO:0006936~muscle contraction                                    | ACTG2, SLMAP, EDN1, ADRA1A, TTN, KCNQ1, SGCA, DTNA                                                               | 8     | 3.52422908 | 0.00196627 | 3.17954208 |
|              | GO:0001568~blood vessel development                              | RECK, FGF18, NRP1, EDN1, TGFB3, NOS2, JAG1, NR2F2, FGF1, TCF7L2                                                  | 10    | 4.40528634 | 0.00214782 | 3.46827582 |
| Related Proc | GO:0001944~vasculature development                               | RECK, FGF18, NRP1, EDN1, TGFB3, NOS2, JAG1, NR2F2, FGF1, TCF7L2                                                  | 10    | 4.40528634 | 0.00252843 | 4.07098448 |
|              | GO:0007517~muscle organ development                              | MEF2C, BVES, SVIL, FHL1, TGFB3, CACNB2, TTN, NR2F2, SGCA, IGFBP5                                                 | 10    | 4.40528634 | 7.60E-04   | 1.24083767 |
|              | GO:0040007~growth                                                | AR, LAMB2, GATM, HOXA5, FHL1, TGFB3, SEPP1, TIMP3, IGFBP5                                                        | 9     | 3.96475771 | 0.0012671  | 2.0599911  |
|              | GO:0016055~Wnt receptor signaling pathway                        | CCDC88C, SOSTDC1, SFRP4, TLE1, AXIN2, TCF7L2, CALCOCO1                                                           | 7     | 3.08370044 | 0.00440416 | 6.98993794 |
|              | GO:0043009~chordate embryonic development                        | AR, SHROOM3, SYVN1, HOXA5, C6, EDN1, IFT172, HOXA7, TGFB3, AXIN2, TCF7L2                                         | 11    | 4.84581498 | 0.00504497 | 7.96787594 |
|              | GO:0009792~embryonic development ending in birth or egg hatching | AR, SHROOM3, SYVN1, HOXA5, C6, EDN1, IFT172, HOXA7, TGFB3, AXIN2, TCF7L2                                         | 11    | 4.84581498 | 0.00536912 | 8.45888533 |
|              | GO:0008217~regulation of blood pressure                          | ACTG2, EDN1, EPHX2, GUCY1A3, NOS2, GNB3                                                                          | 6     | 2.64317181 | 0.0059808  | 9.37872233 |
|              | GO:0008219~cell death                                            | MEF2C, C7, MAGI3, AR, ARHGEF6, C6, ITSN1, PRUNE2, SYNE1, CDKN1B, UBA1, KRT8, ADRA1A, TNFRSF19, CAB3, AXIN2, HIP1 | 17    | 7.48898678 | 0.00883266 | 13.5539207 |
|              | GO:0016265~death                                                 | MEF2C, C7, MAGI3, AR, ARHGEF6, C6, ITSN1, PRUNE2, SYNE1, CDKN1B, UBA1, KRT8, ADRA1A, TNFRSF19, CAB3, AXIN2, HIP1 | 17    | 7.48898678 | 0.00940285 | 14.3667236 |

**Cluster X**

| Primary Proc Term                                     | Genes                                                                                                                 | Count | %          | PValue     | FDR        |
|-------------------------------------------------------|-----------------------------------------------------------------------------------------------------------------------|-------|------------|------------|------------|
| GO:0019725~cellular homeostasis                       | KCNMA1, SLC8A1, PLP1, CCK, TACR1, SNCA, MAL, PPARGC1A, KCNMB2, ADM, TXNDC16, DMD, GRID2, RYR2, RGN, STC1, CHRNA1, MT3 | 18    | 7.65957447 | 1.98E-04   | 0.3270096  |
| GO:0006873~cellular ion homeostasis                   | KCNMA1, PLP1, SLC8A1, CCK, TACR1, SNCA, MAL, KCNMB2, ADM, GRID2, RYR2, RGN, STC1, CHRNA1, MT3                         | 15    | 6.38297872 | 5.68E-04   | 0.93507639 |
| GO:0042391~regulation of membrane potential           | KCNMA1, PLP1, CCK, TACR1, SNCA, GRID2, MAL, CHRNA1, KCNMB2                                                            | 9     | 3.82978723 | 4.70E-04   | 0.77561159 |
| GO:0009187~cyclic nucleotide metabolic process        | ADM, ADCY5, PDE5A, GUCY1A2, PDE8B                                                                                     | 5     | 2.12765957 | 0.00167004 | 2.72763814 |
| GO:0044057~regulation of system process               | KCNMA1, SLC8A1, CYP2J2, CCK, TACR1, PPP1R12B, SNCA, KCNMB2, ADM, NTRK2, RYR2, CNN1, LGI1                              | 13    | 5.53191489 | 0.00102014 | 1.67458538 |
| GO:0050801~ion homeostasis                            | KCNMA1, PLP1, SLC8A1, CCK, TACR1, SNCA, MAL, KCNMB2, ADM, GRID2, RYR2, RGN, STC1, CHRNA1, MT3                         | 15    | 6.38297872 | 0.00134591 | 2.20376637 |
| GO:0009123~nucleoside monophosphate metabolic process | ADM, ADCY5, PDE5A, GUCY1A2, PDE8B, NT5E                                                                               | 6     | 2.55319149 | 0.00196721 | 3.20561851 |
| GO:0001508~regulation of action potential             | KCNMA1, PLP1, TACR1, MAL, CHRNA1, KCNMB2                                                                              | 6     | 2.55319149 | 0.00224537 | 3.65101117 |
| GO:0030182~neuron differentiation                     | KCNMA1, CCK, STMN2, NTNG1, SOX5, NRXN1, HOXD10, NTRK3, ADM, ANK3, DGKG, DMD, MAP2, NTRK2, SLITRK6                     | 15    | 6.38297872 | 0.00253823 | 4.1178648  |
