# Supplementary material for: Temporal Network Based Analysis of Cell Specific Vein Graft Transcriptome Defines Key Pathways and Hub Genes in Implantation Injury
Source: PubMed Central journal article supplement (PMC3376111; doi:10.1371/journal.pone.0039123), 2012-06-15
Supplement: pone.0039123.s014.pdf [file pone.0039123.s014.pdf]

Table S4A: List of genes from significantly enriched canonical pathways in grafted EC at different time points

| Pathways                                 | ZH Symbols                                                                              | ZH P_value  | 12H Symbols                                                                                                                                                                                                                                                                                                                                                                                              | 12H P_value                                                                             | 24H Symbols                                                                                                                                                                                      | 24H P_value                                                                             | 7D Symbols                                                                                                                                                                                       | 7D P_value                                                                                                                         | 30D Symbols                                                                                                                                                                                                           | 30D P_value |                          |
|------------------------------------------|-----------------------------------------------------------------------------------------|-------------|----------------------------------------------------------------------------------------------------------------------------------------------------------------------------------------------------------------------------------------------------------------------------------------------------------------------------------------------------------------------------------------------------------|-----------------------------------------------------------------------------------------|--------------------------------------------------------------------------------------------------------------------------------------------------------------------------------------------------|-----------------------------------------------------------------------------------------|--------------------------------------------------------------------------------------------------------------------------------------------------------------------------------------------------|------------------------------------------------------------------------------------------------------------------------------------|-----------------------------------------------------------------------------------------------------------------------------------------------------------------------------------------------------------------------|-------------|--------------------------|
| Prothrombin Activation                   | NA                                                                                      | #VALUE!     | COL1A2, COL1A1, KLRB1, PROS1, THBD, COL3A1, TGFBR1, IFI16, TAF13, HSPA5, FCGRI1A, SMARCA4, IL1R2, HSPA4, NFAT5, PKC2, CCL2, BMS1, VPR1, PIK3CG, HSPAP, AKT3, SERPINE1, MMP1 (includes EG-112), TAF12 (includes EG-688), IL1R, TAF9, SELE, GRB2, MAP3K1, HSPA9, HSPA2, PIK3R3, HSPA8, RAS2, IL1RN, SMARCA2, CDKN1A, FBXP4, TGFBR3, HSP90AA1, IL1B, AZM1, BTK, PIK3R3, RAS2, GRB2, PLCG2, PIK3CG, SYK, LYN | 0.26444261                                                                              | NA                                                                                                                                                                                               | COL1A2, COL1A1, COL3A1                                                                  | 0.55662144                                                                                                                                                                                       | COL1A2, COL1A1, COL3A1                                                                                                             | 0.06257036                                                                                                                                                                                                            |             |                          |
| Glucocorticoid Receptor Signaling        | IL8, SELE, HSPA1A, JAK2, NFKB1, BCL2, IL1R2, GT2B, CDKN1A, NFATC2, IL1B, SERPINE1, CSF2 | 0.003235937 | #VALUE!                                                                                                                                                                                                                                                                                                                                                                                                  | IL8, SELE, HSPA1A, JAK2, NFKB1, BCL2, IL1R2, GT2B, CDKN1A, NFATC2, IL1B, SERPINE1, CSF2 | 0.110917482                                                                                                                                                                                      | IL8, SELE, HSPA1A, JAK2, NFKB1, BCL2, IL1R2, GT2B, CDKN1A, NFATC2, IL1B, SERPINE1, CSF2 | 0.023988329                                                                                                                                                                                      | IL8, VCAM1, SELE, TGFBR1, IL6, HSPA5, CD163, NR1C1, FCGRI1A, HSPA2, BCL2, CCL2, PKC2, IL1RN, PIK3CG, CDKN1A, SERPINE1, STAT1, ESR1 | 0.557185749                                                                                                                                                                                                           | CDKN1A      | 0.523600437              |
| Fcg RIB Signaling in B Lymphocytes       | NA                                                                                      | #VALUE!     | PIK3R3, PTPN6, GNL1, GNB3, RAS2, GUCY1A3, PIK3CG, CDKN1A, GNS5, GNG2, CDKN1B, GUCY1B3                                                                                                                                                                                                                                                                                                                    | 0.247742208                                                                             | PIK3R3, PTPN6, GNL1, GNB3, RAS2, GUCY1A3, PIK3CG, CDKN1A, GNS5, GNG2, CDKN1B, GUCY1B3                                                                                                            | 0.207491352                                                                             | PIK3R3, PTPN6, GNL1, GNB3, RAS2, GUCY1A3, PIK3CG, CDKN1A, GNS5, GNG2, CDKN1B, GUCY1B3                                                                                                            | 0.008709636                                                                                                                        | BTK, PIK3CG, SYK, LYN                                                                                                                                                                                                 | 0.521194711 | 0.521194711              |
| Antiproliferative Role of SSTR2          | CDKN1A, GNG2                                                                            | 0.479733449 | PIK3R3, ARF6, RAS2, PDGFA, PRKCD, PLCG2, PIK3CG, ITGB8, ITGB7, PRKCB                                                                                                                                                                                                                                                                                                                                     | 0.257039578                                                                             | PIK3R3, ARF6, RAS2, PDGFA, PRKCD, PLCG2, PIK3CG, ITGB8, ITGB7, PRKCB                                                                                                                             | 0.257039578                                                                             | PIK3R3, ARF6, RAS2, PDGFA, PRKCD, PLCG2, PIK3CG, ITGB8, ITGB7, PRKCB                                                                                                                             | 0.000831764                                                                                                                        | PAK1, PRKCD, PIK3CG, ITGA5, CD14, CSF1R, PRKCB                                                                                                                                                                        | 0.363078055 | NA                       |
| Macropinositosis Signaling               | ARF6, PRKCB                                                                             | 0.44874539  | PIK3R3, ARF6, RAS2, PDGFA, PRKCD, PLCG2, PIK3CG, ITGB8, ITGB7, PRKCB                                                                                                                                                                                                                                                                                                                                     | 0.257039578                                                                             | PIK3R3, ARF6, RAS2, PDGFA, PRKCD, PLCG2, PIK3CG, ITGB8, ITGB7, PRKCB                                                                                                                             | 0.257039578                                                                             | PIK3R3, ARF6, RAS2, PDGFA, PRKCD, PLCG2, PIK3CG, ITGB8, ITGB7, PRKCB                                                                                                                             | 0.000831764                                                                                                                        | PAK1, PRKCD, PIK3CG, ITGA5, CD14, CSF1R, PRKCB                                                                                                                                                                        | 0.363078055 | NA                       |
| GPCR Signaling                           | GRP95, RGS16, RGS12, NFKB1, ADRA1A, PRKCB                                               | 0.221309471 | ADRA2B, PLCB2, RGS12, CREB5, PDE4D, PIK3CG, RGS10, HTR7, AKT3, RGS14, ADORA3, GRK4, EDNRB, OPRM1, GRB2, GNAO1, PKAR2A, PDE4B, PIK3R3, PLCB4, RAS2, GNAO1, GPR65, ADRA2A, ADORA2A, ADORA1A, PRKCB                                                                                                                                                                                                         | 0.251767693                                                                             | ADRA2B, PLCB2, RGS12, CREB5, PDE4D, PIK3CG, RGS10, HTR7, AKT3, RGS14, ADORA3, GRK4, EDNRB, OPRM1, GRB2, GNAO1, PKAR2A, PDE4B, PIK3R3, PLCB4, RAS2, GNAO1, GPR65, ADRA2A, ADORA2A, ADORA1A, PRKCB | 0.251767693                                                                             | ADRA2B, PLCB2, RGS12, CREB5, PDE4D, PIK3CG, RGS10, HTR7, AKT3, RGS14, ADORA3, GRK4, EDNRB, OPRM1, GRB2, GNAO1, PKAR2A, PDE4B, PIK3R3, PLCB4, RAS2, GNAO1, GPR65, ADRA2A, ADORA2A, ADORA1A, PRKCB | 0.003467369                                                                                                                        | CCRS, CKR5, CD4, ITGA2, ITGAL, PIK3R3, RAS2, PRKCD, PIK3CG, PIK3CB, ITGB5, ITGA4, PRKCB                                                                                                                               | 0.331894458 | NA                       |
| NF-kB Activation by Viruses              | CD4, NFKB1, PRKCB                                                                       | 0.230674719 | AKT3, ITGAL, PRKCB                                                                                                                                                                                                                                                                                                                                                                                       | 0.564936973                                                                             | AKT3, ITGAL, PRKCB                                                                                                                                                                               | 0.564936973                                                                             | AKT3, ITGAL, PRKCB                                                                                                                                                                               | 0.008709636                                                                                                                        | ITGAL, ITGB7, CD9E, ITGAM, ITGA11, F3HA, PTPN6, INSR, ITGA7                                                                                                                                                           | 0.30974193  | ITGA4                    |
| Caveolar-mediated Endocytosis Signaling  | NA                                                                                      | #VALUE!     | PLCB2, CD4, MYL5, GNB3, GNAO1, PTK2, GNB3, GNL1, PIK3CG, AKT3, PAX, CXCR4, EGR1, GNAO1, ITPR1, PIK3R3, MYL9 (includes EG-10398), PLCB4, RND3, CD4, EGR1, GNAO1, GNG2, PRKCB                                                                                                                                                                                                                              | 0.111943788                                                                             | PLCB2, CD4, MYL5, GNB3, GNAO1, PTK2, GNB3, GNL1, PIK3CG, AKT3, PAX, CXCR4, EGR1, GNAO1, ITPR1, PIK3R3, MYL9 (includes EG-10398), PLCB4, RND3, CD4, EGR1, GNAO1, GNG2, PRKCB                      | 0.111943788                                                                             | PLCB2, CD4, MYL5, GNB3, GNAO1, PTK2, GNB3, GNL1, PIK3CG, AKT3, PAX, CXCR4, EGR1, GNAO1, ITPR1, PIK3R3, MYL9 (includes EG-10398), PLCB4, RND3, CD4, EGR1, GNAO1, GNG2, PRKCB                      | 0.004738028                                                                                                                        | FLNA, PLNC, ITGAV, CD48, ITGA5, ACTG2 (includes EG-72), ACTG1, ITGA4                                                                                                                                                  | 0.30974193  | ITGA4                    |
| CXCR4 Signaling                          | RND3, CD4, EGR1, GNAO1, GNG2, PRKCB                                                     | 0.111943788 | PLCB2, CD4, MYL5, GNB3, GNAO1, PTK2, GNB3, GNL1, PIK3CG, AKT3, PAX, CXCR4, EGR1, GNAO1, ITPR1, PIK3R3, MYL9 (includes EG-10398), PLCB4, RND3, CD4, EGR1, GNAO1, GNG2, PRKCB                                                                                                                                                                                                                              | 0.111943788                                                                             | PLCB2, CD4, MYL5, GNB3, GNAO1, PTK2, GNB3, GNL1, PIK3CG, AKT3, PAX, CXCR4, EGR1, GNAO1, ITPR1, PIK3R3, MYL9 (includes EG-10398), PLCB4, RND3, CD4, EGR1, GNAO1, GNG2, PRKCB                      | 0.111943788                                                                             | PLCB2, CD4, MYL5, GNB3, GNAO1, PTK2, GNB3, GNL1, PIK3CG, AKT3, PAX, CXCR4, EGR1, GNAO1, ITPR1, PIK3R3, MYL9 (includes EG-10398), PLCB4, RND3, CD4, EGR1, GNAO1, GNG2, PRKCB                      | 0.004738028                                                                                                                        | FLNA, PLNC, ITGAV, CD48, ITGA5, ACTG2 (includes EG-72), ACTG1, ITGA4                                                                                                                                                  | 0.30974193  | ITGA4                    |
| Fc Epsilon R1 Signaling                  | FCER1G, CSF2, LCP2, PRKCB                                                               | 0.17538805  | FCER1G, CSF2, LCP2, PRKCB                                                                                                                                                                                                                                                                                                                                                                                | 0.17538805                                                                              | FCER1G, CSF2, LCP2, PRKCB                                                                                                                                                                        | 0.17538805                                                                              | FCER1G, CSF2, LCP2, PRKCB                                                                                                                                                                        | 0.006309573                                                                                                                        | BTK, PRKCD, PIK3CG, SYK, VAV3, FCER1G, LYN, PIK3CG, PIK3CB, LCP2, PRKCB                                                                                                                                               | 0.194088588 | NA                       |
| IL-8 Signaling                           | IL8, ITGAM, RND3, NCF2, CYBB, HBEFG, GNA13, GNG2, NFKB1, BCL2, PRKCB, IRAK2             | 0.00047863  | IL8, ITGAM, RND3, NCF2, CYBB, HBEFG, GNA13, GNG2, NFKB1, BCL2, PRKCB, IRAK2                                                                                                                                                                                                                                                                                                                              | 0.00047863                                                                              | IL8, ITGAM, RND3, NCF2, CYBB, HBEFG, GNA13, GNG2, NFKB1, BCL2, PRKCB, IRAK2                                                                                                                      | 0.00047863                                                                              | IL8, ITGAM, RND3, NCF2, CYBB, HBEFG, GNA13, GNG2, NFKB1, BCL2, PRKCB, IRAK2                                                                                                                      | 0.020892961                                                                                                                        | NCF2, CYBB, GNG2, PRKCB                                                                                                                                                                                               | 0.185780446 | NA                       |
| IL-4 Signaling                           | NFATC2, JAK2                                                                            | 0.477529274 | PIK3R3, IL2RG, PTPN6, NFAT5, RAS2, GRB2, PIK3CG, HMG2A1, AKT3                                                                                                                                                                                                                                                                                                                                            | 0.506990708                                                                             | PIK3R3, IL2RG, PTPN6, NFAT5, RAS2, GRB2, PIK3CG, HMG2A1, AKT3                                                                                                                                    | 0.506990708                                                                             | PIK3R3, IL2RG, PTPN6, NFAT5, RAS2, GRB2, PIK3CG, HMG2A1, AKT3                                                                                                                                    | 0.001174898                                                                                                                        | HLA-DQB1, HLA-DMA, IL2RG, PIK3CG, HLA-DRA, HLA-DQA1, HMG2A1, HLA-DMB, NR3C1                                                                                                                                           | 0.158854675 | HLA-DRA, HLA-DQA1        |
| GM-CSF Signaling                         | CSF2RA (includes EG-1438), JAK2, CSF2, PRKCB                                            | 0.081283052 | RUNX1, BCL2L1, PIK3CG                                                                                                                                                                                                                                                                                                                                                                                    | 0.125025903                                                                             | RUNX1, BCL2L1, PIK3CG                                                                                                                                                                            | 0.125025903                                                                             | RUNX1, BCL2L1, PIK3CG                                                                                                                                                                            | 0.004142538                                                                                                                        | CAMK2D, CAMK2A, PIK3CG, LYN, RUNX1, STAT1, GNAO1, CAMK2G, PRKCB                                                                                                                                                       | 0.107646521 | NA                       |
| IL-6 Signaling                           | IL1R2, IL8, IL18, IL18, JAK2, TNFAIP6, NFKB1                                            | 0.009772372 | IL1R2, IL8, IL18, IL18, JAK2, TNFAIP6, NFKB1                                                                                                                                                                                                                                                                                                                                                             | 0.009772372                                                                             | IL1R2, IL8, IL18, IL18, JAK2, TNFAIP6, NFKB1                                                                                                                                                     | 0.009772372                                                                             | IL1R2, IL8, IL18, IL18, JAK2, TNFAIP6, NFKB1                                                                                                                                                     | 0.021379621                                                                                                                        | COL1A1, IL8, IL18, CYP19A1, IL1RN, TNFRSF1A, SFR, CD14, MAP4K4, MAP2K3, IL6, TNFRSF11B                                                                                                                                | 0.0616595   | COL1A1, IL18             |
| NFAT in Reg of the IR                    | CD4, FCER1G, NFATC2, GNAO1, GNG2, NFKB1, LCP2, RCAN1                                    | 0.037155523 | CD4, FCER1G, NFATC2, GNAO1, GNG2, NFKB1, LCP2, RCAN1                                                                                                                                                                                                                                                                                                                                                     | 0.037155523                                                                             | CD4, FCER1G, NFATC2, GNAO1, GNG2, NFKB1, LCP2, RCAN1                                                                                                                                             | 0.037155523                                                                             | CD4, FCER1G, NFATC2, GNAO1, GNG2, NFKB1, LCP2, RCAN1                                                                                                                                             | 0.000144544                                                                                                                        | IL8, VCAM1, PLCB2, MAPK6, MMP2, CSTB, BCL2, HMOX1, RHOG, CCRND, PRKCD, PIK3CG, KDR, PIK3CG, PIK3CB, LCP2, PRKCB                                                                                                       | 0.0616595   | HLA-DRA, HLA-DQA1        |
| Aldosterone Sig in Epithelial Cells      | NA                                                                                      | #VALUE!     | IL8, TLR1, IL1A, CD4, TLR2, IL1R, IL18, CD4, HLA-A, CD80, IL1RN, FCER1G, IL18, TLR3, TNFSF13B                                                                                                                                                                                                                                                                                                            | 0.251767693                                                                             | IL8, TLR1, IL1A, CD4, TLR2, IL1R, IL18, CD4, HLA-A, CD80, IL1RN, FCER1G, IL18, TLR3, TNFSF13B                                                                                                    | 0.251767693                                                                             | IL8, TLR1, IL1A, CD4, TLR2, IL1R, IL18, CD4, HLA-A, CD80, IL1RN, FCER1G, IL18, TLR3, TNFSF13B                                                                                                    | 0.006918331                                                                                                                        | TM6SF1, VCAM1, CXCR4, MMP14, MMP2, NCF4, ACTG1, BTK, ARHGAP9, TIMP1, CLDN1, PIK3CG, VAV3, PRKCD, NCF2, CYBB, VAV1, ACTG2 (includes EG-72), MMP19, ITGA4, MSN, PRKCB                                                   | 0.040738028 | CLDN1, ITGA4             |
| Innate and Adaptive Immune Cells         | IL8, IL1R, CD4, CD4, FCER1G, IL18, CSF2                                                 | 0.009772372 | IL8, IL1R, CD4, CD4, FCER1G, IL18, CSF2                                                                                                                                                                                                                                                                                                                                                                  | 0.009772372                                                                             | IL8, IL1R, CD4, CD4, FCER1G, IL18, CSF2                                                                                                                                                          | 0.009772372                                                                             | IL8, IL1R, CD4, CD4, FCER1G, IL18, CSF2                                                                                                                                                          | 0.006918331                                                                                                                        | TM6SF1, VCAM1, CXCR4, MMP14, MMP2, NCF4, ACTG1, BTK, ARHGAP9, TIMP1, CLDN1, PIK3CG, VAV3, PRKCD, NCF2, CYBB, VAV1, ACTG2 (includes EG-72), MMP19, ITGA4, MSN, PRKCB                                                   | 0.040738028 | CLDN1, ITGA4             |
| Leukocyte Extravasation Signaling        | ITGAM, ARHGAP9, CLDN1, NCF2, CYBB, NCF4, PRKCB                                          | 0.095499259 | ITGAM, ARHGAP9, CLDN1, NCF2, CYBB, NCF4, PRKCB                                                                                                                                                                                                                                                                                                                                                           | 0.095499259                                                                             | ITGAM, ARHGAP9, CLDN1, NCF2, CYBB, NCF4, PRKCB                                                                                                                                                   | 0.095499259                                                                             | ITGAM, ARHGAP9, CLDN1, NCF2, CYBB, NCF4, PRKCB                                                                                                                                                   | 0.003630781                                                                                                                        | PLCB2, PDIA3, MYL5, GNB1, GNL1, PLCE1, RHOG, ADCY5, PIK3CG, GATA6, ARHGFE3, GRB2, ARHGFE15, ITPR1, MYL6B, PIK3R3, MYL9 (includes EG-10398), PLCB4, RAS2, PRKCD, GNAO1, PPR1R12B, PPR1R12A, ARHGFE3, GNG2, GNG2, PRKCB | 0.040738028 | CLDN1, ITGA4             |
| Thrombin Signaling                       | RND3, GNAO1, GNG2, NFKB1, PRKCB                                                         | 0.298538262 | RND3, GNAO1, GNG2, NFKB1, PRKCB                                                                                                                                                                                                                                                                                                                                                                          | 0.298538262                                                                             | RND3, GNAO1, GNG2, NFKB1, PRKCB                                                                                                                                                                  | 0.298538262                                                                             | RND3, GNAO1, GNG2, NFKB1, PRKCB                                                                                                                                                                  | 0.004168694                                                                                                                        | PSAT1, PLCB2, MAOB, PLCE1, BHMT, PDIA3, CHKA, PHGDH, GOT1, PLC2, PLCL1, SHMT2                                                                                                                                         | 0.029512092 | NA                       |
| Glycine, Serine and Threonine Metabolism | NA                                                                                      | #VALUE!     | ITGAM, ARHGAP9, CLDN1, NCF2, CYBB, NCF4, PRKCB                                                                                                                                                                                                                                                                                                                                                           | 0.095499259                                                                             | ITGAM, ARHGAP9, CLDN1, NCF2, CYBB, NCF4, PRKCB                                                                                                                                                   | 0.095499259                                                                             | ITGAM, ARHGAP9, CLDN1, NCF2, CYBB, NCF4, PRKCB                                                                                                                                                   | 0.003630781                                                                                                                        | PLCB2, PDIA3, MYL5, GNB1, GNL1, PLCE1, RHOG, ADCY5, PIK3CG, GATA6, ARHGFE3, GRB2, ARHGFE15, ITPR1, MYL6B, PIK3R3, MYL9 (includes EG-10398), PLCB4, RAS2, PRKCD, GNAO1, PPR1R12B, PPR1R12A, ARHGFE3, GNG2, GNG2, PRKCB | 0.040738028 | CLDN1, ITGA4             |
| Calcium-induced T Lymphocyte Apoptosis   | CD4, NR4A1, FCER1G, NFATC2, PRKCB                                                       | 0.032359366 | CD4, NR4A1, FCER1G, NFATC2, PRKCB                                                                                                                                                                                                                                                                                                                                                                        | 0.032359366                                                                             | CD4, NR4A1, FCER1G, NFATC2, PRKCB                                                                                                                                                                | 0.032359366                                                                             | CD4, NR4A1, FCER1G, NFATC2, PRKCB                                                                                                                                                                | 0.00676083                                                                                                                         | HLA-DQB1, HLA-DMA, PRKCD, CD4, HLA-DRA, HLA-DQA1, FCER1G, HLA-DMB, ITPR1, ATP2A2, PRKCB                                                                                                                               | 0.021877616 | HLA-DRA, HLA-DQA1        |
| Endothelin-1 Signaling                   | MYC, GNAO1, PRKCB                                                                       | 0.615176873 | MYC, GNAO1, PRKCB                                                                                                                                                                                                                                                                                                                                                                                        | 0.615176873                                                                             | MYC, GNAO1, PRKCB                                                                                                                                                                                | 0.615176873                                                                             | MYC, GNAO1, PRKCB                                                                                                                                                                                | 0.001202264                                                                                                                        | PLCB2, EDNRB, GUCY1A3, PDIA3, CASP4, ITPR1, PLC2, LAMB2, CASP6, HMOX1, PLCE1, ADCY5, PIK3CG, PRKCD, GNAO1, GUCY1A2, EDNRB, CASP8, PLC2, GUCY1B3, PRKCB, CASP10                                                        | 0.016218101 | NA                       |
| Cdc42 Signaling                          | NA                                                                                      | #VALUE!     | NA                                                                                                                                                                                                                                                                                                                                                                                                       | #VALUE!                                                                                 | NA                                                                                                                                                                                               | #VALUE!                                                                                 | NA                                                                                                                                                                                               | 0.233887724                                                                                                                        | DRA, ARPC4, FCER1G, PPR1R12A, VAV1, ITGA4                                                                                                                                                                             | 0.01        | HLA-DRA, HLA-DQA1, ITGA4 |
| G2/M DNA Damage Checkpoint Reg           | CDKN1A                                                                                  | 0.619441075 | CDKN1A                                                                                                                                                                                                                                                                                                                                                                                                   | 0.619441075                                                                             | CDKN1A                                                                                                                                                                                           | 0.619441075                                                                             | CDKN1A                                                                                                                                                                                           | 0.625172693                                                                                                                        | CDKN1A, TOP2A, MDM2, CHEK2, CCR3, PLCB2, CXCR4, GNAO1, PTK2, PLCB4, RAS2, CCL4, CCL2, CCL7, PLCG2, PIK3CG, PPR1R12B, PPR1R12A, PRKCB                                                                                  | 0.009332543 | CDKN1A, TOP2A            |
| Chemokine Signaling                      | CCL4, CCL7, PRKCB                                                                       | 0.230674719 | CCL4, CCL7, PRKCB                                                                                                                                                                                                                                                                                                                                                                                        | 0.230674719                                                                             | CCL4, CCL7, PRKCB                                                                                                                                                                                | 0.230674719                                                                             | CCL4, CCL7, PRKCB                                                                                                                                                                                | 0.015488166                                                                                                                        | PLCB2, EDNRB, GUCY1A3, PDIA3, CASP4, ITPR1, PLC2, LAMB2, CASP6, HMOX1, PLCE1, ADCY5, PIK3CG, PRKCD, GNAO1, GUCY1A2, EDNRB, CASP8, PLC2, GUCY1B3, PRKCB, CASP10                                                        | 0.008317638 | NA                       |
| RhoA Signaling                           | ARHGAP9, GNA13                                                                          | 0.623734835 | ARHGAP9, GNA13                                                                                                                                                                                                                                                                                                                                                                                           | 0.623734835                                                                             | ARHGAP9, GNA13                                                                                                                                                                                   | 0.623734835                                                                             | ARHGAP9, GNA13                                                                                                                                                                                   | 0.295120923                                                                                                                        | PSAT1, PLCB2, MAOB, PLCE1, BHMT, PDIA3, CHKA, PHGDH, GOT1, PLC2, PLCL1, SHMT2                                                                                                                                         | 0.007624271 | WASP1                    |

|                                           |                                                          |             |                                                                                                                                                                                                                                                                                                         |             |                                                                                                                                                                                                                                              |             |                                                                                                                                                                                                                                                                                                                                                                                                                                        |              |                                                 |             |
|-------------------------------------------|----------------------------------------------------------|-------------|---------------------------------------------------------------------------------------------------------------------------------------------------------------------------------------------------------------------------------------------------------------------------------------------------------|-------------|----------------------------------------------------------------------------------------------------------------------------------------------------------------------------------------------------------------------------------------------|-------------|----------------------------------------------------------------------------------------------------------------------------------------------------------------------------------------------------------------------------------------------------------------------------------------------------------------------------------------------------------------------------------------------------------------------------------------|--------------|-------------------------------------------------|-------------|
| PI3K Signaling in B Lymphocytes           | ATF3, NFATC2, NFKB1, PRKCB                               | 0.297166603 | PLCB2, ATF3, ITPR1, BTK, PTPRC, PLCB4, RRSAS2, NFAT5, PICE1, CD180, VAV3, PLCG2, PIK3CG, SYK, LYN, AKT3, VAV1, PIK3AP1, PRKCB                                                                                                                                                                           | 0.291071712 | PLCB2, PDIA3, ITPR1, PTPRC, BTK, PLCB4, PICE1, RRSAS2, CD180, PIK3CG, SYK, LYN, PIK3CB, VAV1, PIK3AP1, PIK3CD, PRKCB                                                                                                                         | 0.034673685 | PLCB2, PDIA3, ITPR1, PLCCL2, PTPRC, BTK, CAMK2A, CAMK2D, PICE1, CD180, BCL10, VAV3, PIK3CG, SYK, LYN, VAV1, PIK3AP1, PLCCL1, CAMK2G, PRKCB                                                                                                                                                                                                                                                                                             | 0.007413102  | NA                                              | #VALUE!     |
| LXR/RXR Activation                        | IL1R2, IL18, CCL7, IL18, NFKB1                           | 0.035481339 | IL1A, ECHS1, IL6, IL1R2, APOC1, IL18, CCL2, CCL7, IL1RN, IL1B, TLR3, LRP, PLTP, HMGBR, HADH                                                                                                                                                                                                             | 0.079432822 | CD14, IL18, IL6, HMGBR, HLA-DQB1, PTPRC, HLA-DMA, HLA-DOA, CD80, HLA-DRA, HLA-DQA1, CD86, HLA-DMB, HLA-DMA, HLA-DOA, GRB2, CD4, HLA-DQA1, HLA-DMB, HLA-DQB1, PIK3R3, RRSAS2, CD80, PIK3CG, HLA-DRA, FCER1G, CD86, PIK3CB, VAV1, PIK3CD, LCP2 | 0.024547089 | CD14, IL18, IL6, HMGBR, HLA-DQB1, PTPRC, HLA-DMA, CD80, HLA-DRA, HLA-DQA1, CD86, HLA-DMB, HLA-DMA, CD4, HLA-DQA1, HLA-DMB, MAP3K5 (includes EG:4217), HLA-DQB1, CAMK2A, CAMK2D, CD80, BCL10, PIK3CG, VAV1, HLA-DRA, FCER1G, CD86, VAV1, LCP2, CAMK2G                                                                                                                                                                                   | 0.007413102  | IL18                                            | 0.348337315 |
| B Cell Development                        | NA                                                       | #VALUE!     | NA                                                                                                                                                                                                                                                                                                      | #VALUE!     | NA                                                                                                                                                                                                                                           | 0.005128614 | DRA, HLA-DQA1, CD86, HLA-DMB, HLA-DMA, CD4, HLA-DQA1, HLA-DMB, MAP3K5 (includes EG:4217), HLA-DQB1, CAMK2A, CAMK2D, CD80, BCL10, PIK3CG, VAV1, HLA-DRA, FCER1G, CD86, VAV1, LCP2, CAMK2G                                                                                                                                                                                                                                               | 0.007079458  | HLA-DRA, HLA-DQA1                               | 0.060255959 |
| PKC Signaling in T Lymphocytes            | CD4, FCER1G, NFATC2, NFKB1, LCP2                         | 0.117489755 | GRB2, CD4, MAP3K1, PIK3R3, NFAT5, RRSAS2, CD80, PLCG2, PIK3CG, VAV3, FCER1G, VAV1, LCP2                                                                                                                                                                                                                 | 0.592925325 | LCP2, HLA-DMA, HLA-DOA, PTPN6, GRB2, CD4, HLA-DQA1, HLA-DMB, HLA-DQB1, PIK3R3, CD80, PIK3CG, SYK, HLA-DRA, FCER1G, CD86, PIK3CB, 0.474241985                                                                                                 | 0.005495409 | HLA-DMA, AP152, CD4, HLA-DQA1, TRAT1, HLA-DMB, HLA-DQB1, CD80, PPM1J, PIK3CG, SYK, HLA-DRA, FCER1G, CD86, PTP2R1B, LCP2, IL2RG, IL12A, TYROBP, CD83, IL6, ACTG1, IL18, CAMK2A, CAMK2D, CD80, FSCN1, HLA-DRA, CD86, ACTG2 (includes EG:72), LTBR, CAMK2G, TLR2, IL8, TLR1, TREM1, IL18, CCL2, CCL7, TYROBP, ITGA5, CD86, CD83, IL6, PLCB2, PDIA3, PLCCL2, CAMK2A, PICE1, CAMK2D, RORA, PRKCD, GNAO1, MAP2K3, PLCL1, RORB, PRKCB, CAMK2G | 0.007079458  | HLA-DRA, HLA-DQA1                               | 0.139636836 |
| CTLA4 Signaling in CTL                    | CD4, FCER1G, JAK2, LCP2                                  | 0.171001532 | PIK3R3, PTPN6, CD80, GRB2, CD4, PIK3CG, SYK, IL2RG, IL18, HLA-A, CD80, FSCN1, TLR3                                                                                                                                                                                                                      | 0.474241985 | PIK3CB, PTPN22                                                                                                                                                                                                                               | 0.000676083 | HLA-DMA, AP152, CD4, HLA-DQA1, TRAT1, HLA-DMB, HLA-DQB1, CD80, PPM1J, PIK3CG, SYK, HLA-DRA, FCER1G, CD86, PTP2R1B, LCP2, IL2RG, IL12A, TYROBP, CD83, IL6, ACTG1, IL18, CAMK2A, CAMK2D, CD80, FSCN1, HLA-DRA, CD86, ACTG2 (includes EG:72), LTBR, CAMK2G, TLR2, IL8, TLR1, TREM1, IL18, CCL2, CCL7, TYROBP, ITGA5, CD86, CD83, IL6, PLCB2, PDIA3, PLCCL2, CAMK2A, PICE1, CAMK2D, RORA, PRKCD, GNAO1, MAP2K3, PLCL1, RORB, PRKCB, CAMK2G | 0.00691831   | HLA-DRA, HLA-DQA1                               | 0.112201845 |
| Dendritic Cells and Natural Killer Cells  | IL18, TYROBP, CSF2, NFKB1                                | 0.16904093  | IL18, TYROBP, CSF2, NFKB1, IL18, HLA-A, CD80, FSCN1, TLR3                                                                                                                                                                                                                                               | 0.349140315 | IL2RG, IL18, HLA-A, CD80, FSCN1, TLR3                                                                                                                                                                                                        | 0.112201845 | HLA-DMA, AP152, CD4, HLA-DQA1, TRAT1, HLA-DMB, HLA-DQB1, CD80, PPM1J, PIK3CG, SYK, HLA-DRA, FCER1G, CD86, PTP2R1B, LCP2, IL2RG, IL12A, TYROBP, CD83, IL6, ACTG1, IL18, CAMK2A, CAMK2D, CD80, FSCN1, HLA-DRA, CD86, ACTG2 (includes EG:72), LTBR, CAMK2G, TLR2, IL8, TLR1, TREM1, IL18, CCL2, CCL7, TYROBP, ITGA5, CD86, CD83, IL6, PLCB2, PDIA3, PLCCL2, CAMK2A, PICE1, CAMK2D, RORA, PRKCD, GNAO1, MAP2K3, PLCL1, RORB, PRKCB, CAMK2G | 0.0065623413 | IL18, HLA-DRA                                   | 0.111943788 |
| TREM1 Signaling                           | IL18, TREM1, IL18, CCL7, TYROBP, IL18, JAK2, CSF2, NFKB1 | 2.00E-05    | TLR1, IL8, TREM1, GRB2, TYROBP, LAT2, IL6, TLR2, NOD2, IL18, CCL2, CCL7, PLCG2, AKT3, IL18, TLR3                                                                                                                                                                                                        | 0.012022644 | TLR2, IL18, CCL2, CCL7, IL18, CD86                                                                                                                                                                                                           | 0.000691831 | ITGA5, CD86, CD83, IL6, PLCB2, PDIA3, PLCCL2, CAMK2A, PICE1, CAMK2D, RORA, PRKCD, GNAO1, MAP2K3, PLCL1, RORB, PRKCB, CAMK2G                                                                                                                                                                                                                                                                                                            | 0.005623413  | IL18                                            | 0.325087297 |
| Melatonin Signaling                       | PRKCB                                                    | 0.727779805 | PLCB2, PLCB4, PICE1, RORA, PRKCD, PLCG2, GNAO1, GNAI1, PRKAR2A, PRKCB                                                                                                                                                                                                                                   | 0.368977599 | PLCB2, PLCB4, PICE1, PDIA3, PRKCD, GNAO1, PRKAR2A, MAP2K3, RORB, PRKCB                                                                                                                                                                       | 0.054954087 | ACTR2, ARPC1B, ARPCS1 (includes EG:81873), MYL5, ARPC5, PIP3K1B, GSN, MYL9 (includes EG:10398), PAK1, RHOG, ARPC2, ARPC4, PPM1R12B, PPM1R12A, ACTG2 (includes EG:72), PIP5CA                                                                                                                                                                                                                                                           | 0.003090295  | NA                                              | #VALUE!     |
| Regulation of Actin-based Motility by Rho | NA                                                       | #VALUE!     | MYLK, MYL9 (includes EG:10398), ARPC1B, PAK3, ARPCS1 (includes EG:81873), ARPC2, ACTA2, MYL5, PPM1R12B, PPM1R12A, GSN                                                                                                                                                                                   | 0.474241985 | MYL9 (includes EG:10398), RHOG, PAK3, ARPC2, ACTA2, MYL5, PPM1R12B, PIP5K1B, GSN, MYL6B                                                                                                                                                      | 0.137088177 | HLA-DMA, IL2RG, CD4, CSK, HLA-DQA1, TRAT1, HLA-DMB, ITPR1, HLA-DQB1, PTPRC, CAMK2A, CAMK2D, CD80, PIK3CG, HLA-DRA, FCER1G, VAV1, LCP2, CAMK2G                                                                                                                                                                                                                                                                                          | 0.003090295  | WASF1                                           | 0.348337315 |
| ICOS-ICOSL Signaling in Th Cells          | CD4, FCER1G, NFATC2, NFKB1, LCP2                         | 0.1         | IL2RG, GRB2, CD4, CSK, ITPR1, PTPRC, PIK3R3, NFAT5, CD80, PIK3CG, FCER1G, AKT3, VAV1, LCP2                                                                                                                                                                                                              | 0.434510224 | NA                                                                                                                                                                                                                                           | 0.000851138 | KIF23, CCNB1, CDC20, PTTG1, PRCL1, CCNB3, CDMB2, PLK1, CENK1, CDC25B, PLK4, PPM1J, PPM1R12B, NF11, CDC25A                                                                                                                                                                                                                                                                                                                              | 0.002344229  | HLA-DRA, HLA-DQA1                               | 0.130918192 |
| Mitotic Roles of Polo-Like Kinase         | NA                                                       | #VALUE!     | CDC25B, PLK2, CDK7, HSP90A1, PPP2R1B, CHEK2                                                                                                                                                                                                                                                             | 0.751622894 | NA                                                                                                                                                                                                                                           | #VALUE!     | IL12A, HLA-DQA1, HLA-DMB, CD83, IL6, CREB5, FCGRI1A, COL1A2, CD1A, PIK3CG, HLA-DRA, LTBR, STAT1, TNFRSF11B, HLA-DMA, TNFRSF1A, TYROBP, TLR2, HLA-DQB1, COL1A1, IL18, CD80, IL1RN, FSCN1, FCER1G, CD86, IFNAR1, COL3A1                                                                                                                                                                                                                  | 0.00018197   | NA                                              | #VALUE!     |
| Dendritic Cell Maturation                 | IL18, TYROBP, CD1A, FCER1G, IL18, JAK2, CSF2, NFKB1      | 0.033113112 | IL1A, LEP, TYROBP, MYD88, IL6, CREB5, FCGRI1A, COL1A2, PIK3R3, TLR2, COL3A1, IL18, CD80, HLA-A, IL1RN, CD1A, PIK3CG, FSCN1, FCER1G, AKT3, IL18, TLR3, COL3A1                                                                                                                                            | 0.247742206 | HLA-DMA, HLA-DOA, IL1A, TYROBP, HLA-DQA1, HLA-DMB, CD83, IL6, FCGRI1A, PIK3R3, HLA-DQB1, TLR2, IL18, CD80, IL1RN, CD1A, PIK3CG, HLA-DRA, FCER1G, CD86, IL18, PIK3CB, PIK3CD, COL3A1                                                          | 0.002884032 | HLA-DMA, IL2RG, IL12A, TGFBR1, TNFRSF1A, HLA-DQA1, HLA-DMB, IL6, HLA-DQB1, IL18, CD80, HLA-DMB, IL6                                                                                                                                                                                                                                                                                                                                    | 0.000109648  | COL1A2, COL1A1, IL18, HLA-DRA, HLA-DQA1, COL3A1 | 0.000446684 |
| T Helper Cell Differentiation             | IL18, FCER1G, IL18R1                                     | 0.230674719 | IL6ST, IL2RG, IL18, TGFBR1, CD80, FCER1G, IL6, BCL6, IL18R1                                                                                                                                                                                                                                             | 0.493173804 | CD80, HLA-DRA, HLA-DQA1, FCER1G, CD86, HLA-DMB, IL6                                                                                                                                                                                          | 0.013182567 | DRA, IL10R8, FCER1G, CD86, STAT1, TNFRSF11B, AB12, ARPC1B, F2R, DIAPH3, ARPCS5, MYL5, MYH11, PIP5K1B, FGF13, IQGAP2, PAK1, PIK3CG, ARPC4, ACTG2 (includes EG:72), PIP5CA, SSH2, ITGA4, ACTR2, ARPCS1 (includes EG:81873), CSK, ITGA5, GSN, ACTG1, TTN, MYL9 (includes EG:10398), TIAM2 (includes EG:26230), VAV3, ARPC2, PPM1R12B, PPM1R12A, CD14, VAV1, NCKAP1L, MSN                                                                  | 0.000109648  | IL18, HLA-DRA, HLA-DQA1                         | 0.017378008 |
| Actin Cytoskeleton Signaling              | GNAI13, NCKAP1L, FGF19 (includes EG:9965)                | 0.707945784 | AB12, ARPC1B, PDGFA, ACTA2, MYL5, MYL3, MYH11, PDGFR, FGF13, PTP2, MYL4, PIK3CG, LBP, FGF16, PXN, ARHGFE12, GRB2, ARPCS1 (includes EG:81873), CSK, GSN, ACTG1, MYL9 (includes EG:10398), PIK3R3, RRSAS2, TIAM2 (includes EG:26230), PAK3, VAV3, ARPC2, ARHGFE6, SSH3, PPM1R12B, PPM1R12A, VAV1, NCKAP1L | 0.085113804 | PDGFD                                                                                                                                                                                                                                        | 0.000851138 | NCKAP1L, MSN                                                                                                                                                                                                                                                                                                                                                                                                                           | 0.000102329  | WASF1, ITGA4                                    | 0.291071712 |
| Fcg Receptor-mediated Phagocytosis        | ARF6, CSF2, FYB, LCP2, PRKCB                             | 0.069183097 | NAPEPLD, ARPC1B, NCF1C, ACTA2, FCGRI1A, ARF6, RAB11B, PIK3CG, GPD1, HCK, AKT3, FGR, PAN, ARPCS1 (includes EG:81873), FYB, ACTG1, PIK3R3, ARPC2, PIK3CG, SYK, VAV3, LYN, VAV1, LCP2, PRKCB                                                                                                               | 0.000870964 | ACTA2, FYB, FCGRI1A, PIK3R3, ARF6, PRKCD, ARPC2, E2F, PIK3CG, SYK, LYN, HCK, VAV1, LCP2, PRKCB                                                                                                                                               | 0.008709636 | ACTR2, ARPC1B, ARPCS1 (includes EG:81873), ARPCS5, FYB, FCGRI1A, ACTG1, MYO5A, HMOX1, PAK1, VAV3, SYK, PRKCD, ARPC2, PIK3CG, ARPC4, LYN, VAV1, ACTG2 (includes EG:72), LCP2, PRKCB                                                                                                                                                                                                                                                     | 8.32E-05     | NA                                              | #VALUE!     |
| CD28 Signaling in TH                      | CD4, FCER1G, NFATC2, NFKB1, LCP2                         | 0.124738351 | PTPN6, ARPC1B, ARPCS1 (includes EG:81873), GRB2, CD4, CSK, MAP3K1, ITPR1, PIK3R3, PTPRC, NFAT5, CD80, SYK, PIK3CG, ARPC2, FCER1G, AKT3, VAV1, LCP2                                                                                                                                                      | 0.176603982 | FCER1G, CD86, VAV1, PIK3CB, PIK3CD, LCP2                                                                                                                                                                                                     | 0.000199526 | FCER1G, CD86, VAV1, LCP2                                                                                                                                                                                                                                                                                                                                                                                                               | 8.32E-05     | HLA-DRA, HLA-DQA1                               | 0.142232879 |

Table S4B: List of genes from significantly enriched canonical pathways in grafted SMC.

| Pathways                          | ZH Symbols      | ZH P_value  | LZH Symbols | LZH P_value | Z4H Symbols                                                                                     | Z4H P_value | ZD Symbols                                                                                                                                                                                                                                                                                                                                      | ZD P_value  | 300 Symbols                  | 300 P_value |
|-----------------------------------|-----------------|-------------|-------------|-------------|-------------------------------------------------------------------------------------------------|-------------|-------------------------------------------------------------------------------------------------------------------------------------------------------------------------------------------------------------------------------------------------------------------------------------------------------------------------------------------------|-------------|------------------------------|-------------|
| Mitotic Roles of Polo-Like Kinase | NA              | #VALUE!     | NA          | #VALUE!     | NA                                                                                              | #VALUE!     | KIF23 (CCNB1, CDC20, PTTG1, PRCL1, CDC7, CCNB2, PLK1, PPP2R5A, CDK1, CDC25B, PLK4, PLK2, PPP2R2B, XIF1, CHEK2)                                                                                                                                                                                                                                  | 0.002344229 | NA                           | #VALUE!     |
| Actin Cytoskeleton Signaling      | NA              | #VALUE!     | #VALUE!     | 0.033884416 | MYL9 (includes EG:10398), SHC1, TIAM2 (includes EG:26230), RRSAS2, ARPC1B, GRB2, PPP1R12B, PIK3 | 0.261818301 | MYH10, ARPC1B, DIAPH3, ARPC5, LIMK2, PIP5K1B, MYH7B (includes EG:57644), FGF13, SHC1, FGF10, WASL (includes EG:8976), FGF18, ARPC4, ARPC1A, ACTG2 (includes EG:72), LBP, PPP1CA, ACTN1, ITGA6, MYH1, ACTR2, GRB2, CSK, MYH7, GSN, ACTG1, MYL1, TTN, FGF1, TIAM2 (includes EG:26230), ARPC2, PPP1R12B, CD14, MYH9, PPP1R12A, PIK3CB, NCKAP1, MSN | 0.001202264 | NA                           | #VALUE!     |
| Reactive Oxygen in Macrophages    | NFKB1           | 0.256448404 | #VALUE!     | 0.009772372 | TNFRSF1A, PPP1R3C, PIK3R2, NOS2, PPP1R14B, PRKCB                                                | 0.666806769 | PPP1R3C, RHO1, GSK3, MAP3K5 (includes EG:4217), JAK2, PPP2R5A, TUR2, PRKCD, PPP2R2B, C YBB, PPP1R12A, PIK3CB, STAT1, PPP1CA, PRKDI, PRKCB                                                                                                                                                                                                       | 0.555904257 | FOS                          | 0.123304491 |
| IL-10 Signaling                   | NFKB1           | 0.223872114 | #VALUE!     | 0.009332543 | IL1R2, IL18, IL18R1, IL6                                                                        | 0.566239289 | IL18, IL10R8, CD14, ARG2, MAP4K4, IL1R1, LBP, IL6                                                                                                                                                                                                                                                                                               | 0.405508535 | FOS                          | 0.166341265 |
| NF-kB Signaling                   | NFKB1           | 0.250034536 | #VALUE!     | 0.008912509 | IL1R2, GHR, RRSAS2, IL1RN, TNFRSF1A, BMP2, PDGF, PIK3CB, IRS1, PRKCB                            | 0.261818301 | TLR1, MYD88, MAP4K4, IL1R1, MAL1, TUR2, IL18, GHR, CD40, PIK3CB, EIF2AK2, TLR8, TNFSF13B, IRAK4, PRKCB                                                                                                                                                                                                                                          | 0.592925325 | NA                           | #VALUE!     |
| CCR3 Signaling in Eosinophils     | NA              | #VALUE!     | #VALUE!     | 0.00724436  | RRAS2, ITPR2, PPP1R12B, PIK3R2, ITPR1, PRKCB                                                    | 0.420726628 | PLA2G10, ENAH1, CCL2A, LIMK2, ITPR1, PLCB4, PRKCD, PPP1R12B, PPP1R12A, PIK3CB, GNG2, PPP1CA, PRKDI, PRKCB                                                                                                                                                                                                                                       | 0.331131121 | NA                           | #VALUE!     |
| Renin-Angiotensin Signaling       | NFKB1           | 0.225423921 | #VALUE!     | 0.00724436  | SHC1, RRSAS2, CCL2, GRB2, ITPR2, PIK3R2, ITPR1, PRKARIA                                         | 0.174984669 | SHC1, CCL2, GRB2, PRKCD, SHC3, PIK3CB, JAK2, ITPR1, STAT1, ADCY7, PRKDI, PRKCB                                                                                                                                                                                                                                                                  | 0.472063041 | FOS                          | 0.171790839 |
| RAR Activation                    | NFKB1           | 0.263026799 | #VALUE!     | 0.00724436  | ALDH1A1, SMARCA2, TGFβ3, SNW1, PIK3R2, CITED2                                                   | 0.442588372 | RHD10, CSK, MAP3K5 (includes EG:4217), JAK2, VEGFA, ALDH1A1, RARA, PRKCD, C RABP2, TGFβ3, PIK3CB, ADCY7, ZBTB16, PRKDI, PRKCB                                                                                                                                                                                                                   | 0.645654229 | FOS                          | 0.216271852 |
| ILK Signaling                     | NFKB1           | 0.272270131 | #VALUE!     | 0.007079458 | RRAS2, PPP1R14B, ITGB7                                                                          | 0.420726628 | MYH10, MYH7, RHO1, CREB5, MYH7B (includes EG:57644), ACTG1, PPP2R5A, MYL1, VEGFA, FN1, CF LNA, SNAI2, PPP2R2B, MYH9, PIK3CB, RPS6KA5, AC LNA2 (includes EG:72), ITGB4, ACTN1, MYH1                                                                                                                                                              | 0.404575892 | FOS                          | 0.223357222 |
| Macropinosytosis Signaling        | NA              | #VALUE!     | #VALUE!     | 0.00676083  | RRAS2, PIK3R2, ITGB7, PRKCB                                                                     | 0.423642966 | PRKCD, CD14, PIK3CB, ITGB4, PRKDI, PRKCB                                                                                                                                                                                                                                                                                                        | 0.76913044  | NA                           | #VALUE!     |
| Acute Phase Response Signaling    | SERPINE1, NFKB1 | 0.223872114 | #VALUE!     | 0.00676083  | SHC1, ITH3, RRSAS2, GRB2, IL1RN, TNFRSF1A, SERP1, SERPINA1, PIK3R2, IL6, SERPINE1, A2M          | 0.141905752 | ITH3, GRB2, MYD88, C15, C9, IL6, JAK2, IL1R1, MAP3K5 (includes EG:4217), ILK1B1, SHC1, IL18, TF, CRABP2, CFB, SERP1, TNF, MYD88, TLR2, STAT4, COL1A1, IL18, CD40, CD80, FSCN1, CD86, PIK3CB, STAT2, IFNAR1, PRKCB                                                                                                                               | 0.404575892 | FOS, C15                     | 0.12246162  |
| Relaxin Signaling                 | NFKB1           | 0.233345806 | #VALUE!     | 0.006606934 | GNAO1, PDE8B, PIK3R2, PDE4B, NOS2, PDE4D                                                        | 0.500034535 | NA                                                                                                                                                                                                                                                                                                                                              | #VALUE!     | FOS                          | 0.187931682 |
| P2Y Purigenic Receptor Sig        | NFKB1           | 0.225423921 | #VALUE!     | 0.006606934 | NA                                                                                              | #VALUE!     | PLCB4, PLCE1, PRKCD, GNAI1, PIK3CB, GNG2, CREB5, ADCY7, PRKDI, PRKCB                                                                                                                                                                                                                                                                            | 0.805563908 | FOS                          | 0.176603782 |
| Dendritic Cell Maturation         | NFKB1           | 0.261818301 | #VALUE!     | 0.006606934 | 6, FCGR1A                                                                                       | 0.427562886 | COL3A1                                                                                                                                                                                                                                                                                                                                          | 0.002570396 | COL1A2, COL1A1, CB08, FCGR1A | 0.005248075 |
| IL-1 Signaling                    | NFKB1           | 0.223872114 | #VALUE!     | 0.005754399 | NA                                                                                              | #VALUE!     | NA                                                                                                                                                                                                                                                                                                                                              | #VALUE!     | FOS                          | 0.167494288 |
| CXCR4 Signaling                   | CXCR4           | 0.256448404 | #VALUE!     | 0.005128614 | 1, LYN, PIK3R2, ITPR1, PRKCB                                                                    | 0.149279441 | GNAI1, RHO1, ITPR1, MYL1, PLCB4, PRKCD, GNAO1, LYN, PIK3CB, GNG2, ADCY7, PRKDI, PRKCB                                                                                                                                                                                                                                                           | 0.805563908 | FOS, EGR1                    | 0.10964782  |
| Chemokine Signaling               | CCL4, CXCR4     | 0.126182753 | #VALUE!     | 0.005128614 | CCL4, RRSAS2, CCL2, CCL7, CXCR4, PPP1R12B, PRKCB                                                | 0.128233058 | PLCB4, CCL4, CAM2D2, CCL2, GNAI1, PPP1R12B, PP1R12A, CCL2A, LIMK2, PPP1CA, PRKCB                                                                                                                                                                                                                                                                | 0.244906324 | FOS                          | 0.166341265 |

|                               |       |                                                                                                                                                                                                                                                                                                                                                                                                                                                                                               |             |                                                                                        |             |                                                                                                                                                                                                                                                                                                                                                    |             |            |             |
|-------------------------------|-------|-----------------------------------------------------------------------------------------------------------------------------------------------------------------------------------------------------------------------------------------------------------------------------------------------------------------------------------------------------------------------------------------------------------------------------------------------------------------------------------------------|-------------|----------------------------------------------------------------------------------------|-------------|----------------------------------------------------------------------------------------------------------------------------------------------------------------------------------------------------------------------------------------------------------------------------------------------------------------------------------------------------|-------------|------------|-------------|
| TREM1 Signaling               | NFKB1 | TLR1,IL8,TREM1,ICAM1,TYROBP,GRB2,LAT2,ITGAS5,IL6,IAK2,NFKB2,NFKB1,TLR2,IL18,CCL7,CCL2,CD40,PLCG2,AKT3,IL18,CD81,PLC82,NFKB1,PTPRC,PLCE1,CAMK2D,NFKBIA,PPP3CB,PIK3CG,AKT3,PIK3R2,NFKBIB,PLCL1,C R2,ATF1,ITPR2,ITPR1,NFKB2,BTK,FOS,PLCB4,PRKC,RRAS2,CD180,DAPK1,CD40,SYK,MYL5,PLCG2,LYN,NFATC2,PIK3CB,PIK3A1,IVAV1,PIK3CD,CAMK2G,PRKCB                                                                                                                                                          | 0.005011872 | IL8,CCL2,CCL7,GRB2,TYROBP,IL6                                                          | 0.135831345 | TLR2,IL8,TLR1,IL18,ICAM1,CCL2,CD40,GRB2,TYRORP,CD86,IAK2,IL6                                                                                                                                                                                                                                                                                       | 0.06025959  | NA         | #VALUE!     |
| PI3K in B Lymphocytes         | NFKB1 | MAP2K6,HSP91,IL1A,MAP4K4,IL6,IAK2,MAPK13,NFKB1,IL1R2,NFKBIA,NFKBIB,MAPKAPK2,IL8,GRB2,TNFRSF1A,IL1R1,NFKB2,COL1A1,FOS,IL18,RRAS2,IL1RN,IL18,CD14,MAP2K3,TNFAIP6,AZM,PLCB2,CAMK1D,ADCY5,MYL5,GNB5,MAPK13,PTK2,MYLK,GNB4,RHO,GNB3,PLCE1,CAMK2D,ADCY5,PIK3CG,PLCL1,ITPR2,ITPR1,NFKB2,MYL6B,MYL9 (includes EG:10398),RHOQ,PLCG2,GNAO1,ARHGFE6,PPP1R12B,PPP1R12A,PIK3CD,GN2,OPN15W,GNALC,AMK2G,F2RL2,NFKB1,GNL1,GNAT2,AKT3,GATAG,PIK3R2,PRKCA,GRB2,GNAI1,ADCY6,ROCK1,PLCB4,PRKCI,RRAS2,PIK3CB,PRKCB | 0.005011872 | PTPRC,RRAS2,ITPR2,SYK,LYN,PIK3R2,ITPR1,PRKCB                                           | 0.309029543 | MALT1,ITPR1,CD79A,PTPRC,BTK,PLCB4,PLCE1,CAMK2D,CD180,CD40,LYN,PIK3CB,PRKCB                                                                                                                                                                                                                                                                         | 0.669884609 | FOS        | 0.193642196 |
| IL-6 Signaling                | NFKB1 | MAP2K6,HSP91,IL1A,MAP4K4,IL6,IAK2,MAPK13,NFKB1,IL1R2,NFKBIA,NFKBIB,MAPKAPK2,IL8,GRB2,TNFRSF1A,IL1R1,NFKB2,COL1A1,FOS,IL18,RRAS2,IL1RN,IL18,CD14,MAP2K3,TNFAIP6,AZM,PLCB2,CAMK1D,ADCY5,MYL5,GNB5,MAPK13,PTK2,MYLK,GNB4,RHO,GNB3,PLCE1,CAMK2D,ADCY5,PIK3CG,PLCL1,ITPR2,ITPR1,NFKB2,MYL6B,MYL9 (includes EG:10398),RHOQ,PLCG2,GNAO1,ARHGFE6,PPP1R12B,PPP1R12A,PIK3CD,GN2,OPN15W,GNALC,AMK2G,F2RL2,NFKB1,GNL1,GNAT2,AKT3,GATAG,PIK3R2,PRKCA,GRB2,GNAI1,ADCY6,ROCK1,PLCB4,PRKCI,RRAS2,PIK3CB,PRKCB | 0.005011872 | IL1R2,IL8,SHC1,RRAS2,GRB2,IL1RN,TNFRSF1A,IL1R1,IL18,CD14,MAP2K3,TNFAIP6,AZM            | 0.066069345 | COL1A1,IL8,SHC1,IL18,GRB2,SF,CD14,MAP4K4,IL1R1,IL1R2,MAPK13,PTK2,MYLK,GNB4,RHO,GNB3,PLCE1,CAMK2D,ADCY5,PIK3CG,PLCL1,ITPR2,ITPR1,NFKB2,MYL6B,MYL9 (includes EG:10398),RHOQ,PLCG2,GNAO1,ARHGFE6,PPP1R12B,PPP1R12A,PIK3CD,GN2,OPN15W,GNALC,AMK2G,F2RL2,NFKB1,GNL1,GNAT2,AKT3,GATAG,PIK3R2,PRKCA,GRB2,GNAI1,ADCY6,ROCK1,PLCB4,PRKCI,RRAS2,PIK3CB,PRKCB | 0.299916252 | COL1A1,FOS | 0.0616595   |
| Thrombin Signaling            | NFKB1 | MAP2K6,HSP91,IL1A,MAP4K4,IL6,IAK2,MAPK13,NFKB1,IL1R2,NFKBIA,NFKBIB,MAPKAPK2,IL8,GRB2,TNFRSF1A,IL1R1,NFKB2,COL1A1,FOS,IL18,RRAS2,IL1RN,IL18,CD14,MAP2K3,TNFAIP6,AZM,PLCB2,CAMK1D,ADCY5,MYL5,GNB5,MAPK13,PTK2,MYLK,GNB4,RHO,GNB3,PLCE1,CAMK2D,ADCY5,PIK3CG,PLCL1,ITPR2,ITPR1,NFKB2,MYL6B,MYL9 (includes EG:10398),RHOQ,PLCG2,GNAO1,ARHGFE6,PPP1R12B,PPP1R12A,PIK3CD,GN2,OPN15W,GNALC,AMK2G,F2RL2,NFKB1,GNL1,GNAT2,AKT3,GATAG,PIK3R2,PRKCA,GRB2,GNAI1,ADCY6,ROCK1,PLCB4,PRKCI,RRAS2,PIK3CB,PRKCB | 0.003548134 | MYL9 (includes EG:10398),SHC1,RRAS2,GRB2,ITPR2,GNAO1,PPP1R12B,GATAG,PIK3R2,ITPR1,PRKCB | 0.261818301 | F2RL2,GRB2,ARHGFE15,GNAI1,RHOJ,ITPR1,MYL1,SHC1,PLCB4,CAMK2D,PLCE1,PRKCD,GNAO1,PPP1R12B,PPP1R12A,PIK3CB,ARHGFE3,GN2,ADCY7,PRKQ1,PRKCB                                                                                                                                                                                                               | 0.404575892 | NA         | #VALUE!     |
| FMLP Signaling in Neutrophils | NFKB1 | MAP2K6,HSP91,IL1A,MAP4K4,IL6,IAK2,MAPK13,NFKB1,IL1R2,NFKBIA,NFKBIB,MAPKAPK2,IL8,GRB2,TNFRSF1A,IL1R1,NFKB2,COL1A1,FOS,IL18,RRAS2,IL1RN,IL18,CD14,MAP2K3,TNFAIP6,AZM,PLCB2,CAMK1D,ADCY5,MYL5,GNB5,MAPK13,PTK2,MYLK,GNB4,RHO,GNB3,PLCE1,CAMK2D,ADCY5,PIK3CG,PLCL1,ITPR2,ITPR1,NFKB2,MYL6B,MYL9 (includes EG:10398),RHOQ,PLCG2,GNAO1,ARHGFE6,PPP1R12B,PPP1R12A,PIK3CD,GN2,OPN15W,GNALC,AMK2G,F2RL2,NFKB1,GNL1,GNAT2,AKT3,GATAG,PIK3R2,PRKCA,GRB2,GNAI1,ADCY6,ROCK1,PLCB4,PRKCI,RRAS2,PIK3CB,PRKCB | 0.003548134 | RRAS2,ARPC18,ITPR2,PIK3R2,ITPR1,PRKCB                                                  | 0.414954043 | ACTR2,ARPC18,ARPC5,GNAI1,ITPR1,PLCB4,PRKCD,ARPC2,ARPC4,CYBB,ARPC1A,PIK3CB,GN2,PRKCB                                                                                                                                                                                                                                                                | 0.244906324 | NA         | #VALUE!     |
| IL-8 Signaling                | NFKB1 | MAP2K6,HSP91,IL1A,MAP4K4,IL6,IAK2,MAPK13,NFKB1,IL1R2,NFKBIA,NFKBIB,MAPKAPK2,IL8,GRB2,TNFRSF1A,IL1R1,NFKB2,COL1A1,FOS,IL18,RRAS2,IL1RN,IL18,CD14,MAP2K3,TNFAIP6,AZM,PLCB2,CAMK1D,ADCY5,MYL5,GNB5,MAPK13,PTK2,MYLK,GNB4,RHO,GNB3,PLCE1,CAMK2D,ADCY5,PIK3CG,PLCL1,ITPR2,ITPR1,NFKB2,MYL6B,MYL9 (includes EG:10398),RHOQ,PLCG2,GNAO1,ARHGFE6,PPP1R12B,PPP1R12A,PIK3CD,GN2,OPN15W,GNALC,AMK2G,F2RL2,NFKB1,GNL1,GNAT2,AKT3,GATAG,PIK3R2,PRKCA,GRB2,GNAI1,ADCY6,ROCK1,PLCB4,PRKCI,RRAS2,PIK3CB,PRKCB | 0.003548134 | IL8,ANGPT2,RRAS2,CXCR2,GPLD1,PIK3R2,PTGS2,PRKCB                                        | 0.456036916 | IL8,VCAM1,ICAM1,GNAI1,LIMK2,RHOJ,MAP4K4,CSTB,BCL2,VEGFA,BCL2L1,CND2,PRKCD,KDR,CYBB,PIK3CB,GN2,IRAK4,PRKQ1,PRKCB                                                                                                                                                                                                                                    | 0.325087297 | NA         | #VALUE!     |
| Endothelin-1 Signaling        | NA    | #VALUE!                                                                                                                                                                                                                                                                                                                                                                                                                                                                                       | 0.000316228 | GRB2,ITPR2,ITPR1,MYC,LAMB2,SHC1,RRAS2,GAD1,GPLD1,GNAO1,PIK3R2,PTGS2,NDS2,PRKCB         | 0.066069345 | PLA2G10,SHC3,WISP2,CASP6,SHC1,PLCE1,EDN1,CASP8,PRKQ1,CASP10,EDNRB,GUCY1A3,CASP3,GRB2,YWHAZ,GNAI1,MAPK8,ITPR1,LAMB2,PLCB4,PRKCD,GNAO1,GUCY1A2,PIK3CB,ADCY7,PRKCB                                                                                                                                                                                    | 0.06025959  | FOS        | 0.218272991 |
