# Supplementary material for: Temporal Network Based Analysis of Cell Specific Vein Graft Transcriptome Defines Key Pathways and Hub Genes in Implantation Injury
Source: PLoS One. 2012 Jun 15;7(6):e39123. doi: 10.1371/journal.pone.0039123 (PMC3376111; doi:10.1371/journal.pone.0039123)
Supplement: Table S5 — List of genes from significantly enriched disease pathways in vein grafts at different time points. A) EC, B) SMC. This analysis is performed using Ingenuity Pathway Analysis System and Pathways with multiple test (Holm–Bonferroni method) corrected P value <0.01 was considered significant. (PDF) [file pone.0039123.s015.pdf]

Table S5A: List of genes from significantly enriched disease pathways in EC vein grafts at different time points.

| Disease Pathways                               | 2H Symbols                                                                                           | 2H P-value  | 12H Symbols                                                                                                                                                                                                                                                                                                                                                                                     | 12H P-value | 24H Symbols                                                                                                                                                                                                                                                              | 24H P-value2 | 7D Symbols                                                                                                                                                                                                                                                                            | 7D P-value  | 30D Symbols                         | 30D P-value |
|------------------------------------------------|------------------------------------------------------------------------------------------------------|-------------|-------------------------------------------------------------------------------------------------------------------------------------------------------------------------------------------------------------------------------------------------------------------------------------------------------------------------------------------------------------------------------------------------|-------------|--------------------------------------------------------------------------------------------------------------------------------------------------------------------------------------------------------------------------------------------------------------------------|--------------|---------------------------------------------------------------------------------------------------------------------------------------------------------------------------------------------------------------------------------------------------------------------------------------|-------------|-------------------------------------|-------------|
| Atherosclerosis Signaling                      | IL8, SELE, IL18, IL1B, NFKB1                                                                         | 0.081283052 | IL8, CCR3, SELE, IL1A, PDGFA, CXCR4, IL6, PDGFC, PRDM6, LAMB2, COL1A2, COL1A1, IL1B, SELL, CCL2, IL1RN, IL1B, MMP1 (includes EG-4312), COL3A1                                                                                                                                                                                                                                                   | 0.0616095   | IL8, CCR3, SELE, IL1A, VCAM1, CXCR4, IL6, PDGFC, LAMB2, IL1B, CCL2, IL1RN, IL1B, PDGFD, ITGA4, COL3A1                                                                                                                                                                    | 0.00724436   | IL8, SELE, VCAM1, MSR1, CXCR4, CD36, IL6, LAMB2, COL1A2, COL1A1, IL1B, CCL2, SELL, IL1RN, ITGA4, COL3A1                                                                                                                                                                               | 0.00851138  | COL1A2, COL1A1, IL1B, COL3A1, ITGA4 | 0.000446684 |
| Graft-versus-Host Disease Signaling            | IL18, FCER1G, IL1B                                                                                   | 0.124738351 | IL1A, IL1B, HLA-A, CD80, IL1RN, FCER1G, IL1B, IL6, PTPN6, IL1A, CD8A, GRB2, CY, IL6, FCGRI1A, PIK3R3, PTPRC, IL1B, RAS2, NFAT3, CD80, HLA-A, IL1RN, PIK3G, PLCG2, FCER1G, LYN, AKT3, IL1B, TNFSF13B                                                                                                                                                                                             | 0.124738351 | CD81, IL1B, CD80, IL1RN, HLA-DRA, FCER1G, CD86, IL1B, PTPN6, IL1A, CD8A, GRB2, IL6, FCGRI1A, PTPRC, PIK3R3, IL1B, RAS2, CD80, IL1RN, PIK3G, FCER1G, LYN, C7, CD86, IL1B, PIK3B, PIK3CD                                                                                   | 0.000112202  | PTPRC, IL1B, CD80, IL1RN, PIK3G, FCER1G, LYN, CD86, C6, IL6, FCGRI1A, TNFSF13B                                                                                                                                                                                                        | 0.003090295 | IL1B, HLA-DRA, HLA-DQA1             | 0.005888437 |
| Systemic Lupus Erythematosus Signaling         | IL18, FCER1G, NFATC2, IL1B                                                                           | 0.304088503 |                                                                                                                                                                                                                                                                                                                                                                                                 | 0.17603782  |                                                                                                                                                                                                                                                                          |              |                                                                                                                                                                                                                                                                                       |             |                                     |             |
| Type 1 Diabetes Mellitus Signaling             | SOC3, FCER1G, IL1B, JAK2, NFKB1, BCL2                                                                | 0.03801894  | SOC3, ICAM1, HLA-A, CD80, MYO8B, FCER1G, CYCS (includes EG-54205), IL1B, HSPD1, CASP8, CPE, IL1RAP, PLCB2, PPP1R3C, GNB3, TUBB, PPP1R14B, GNB3, GNG11, PIK3G, RASCC1, ARHGGEF1, ARHGGEF12, TUBB2C, GRB2, GNAI1, TUBA4A, PRKAR2A, ARHGGEF17, ITPR1, PIK3R3, PLCB4, RAS2, PRKCD, CDKN1A, ARHGGEF6, PPP1R12A, GNG2, CDKN1B, PPP2R1B, PIK3C, PTK2, PIK3R3, TIMP3, RAS2, TIMP1, PIK3CG, PLAUR, TIMP2 | 0.610842025 | HLA-DMA, HLA-DQA1, ICAM1, HLA-DQA1, HLA-DMB, HLA-DQB1, CD80, HLA-DRA, FCER1G, IL1B, CYCS (includes EG-54205), CD86, MAP2K3, CASP8, CPE                                                                                                                                   | 0.021379621  | IL6, FCGRI1A, TNFSF13B, HLA-DQA1, HLA-DMB, MAP3K5 (includes EG-4217), BCL2, HLA-DQB1, CD80, HLA-DRA, FCER1G, CD86, MAP2K3, CASP8, STAT1, CPE, TNFRSF11B                                                                                                                               | 0.007762471 | HLA-DRA, HLA-DQA1                   | 0.130918192 |
| Breast Cancer Regulation by Statmin1           | CDKN1A, GNA13, GNA52, PIK3C                                                                          | 0.477529274 |                                                                                                                                                                                                                                                                                                                                                                                                 | 0.125025903 | PLCB2, GRB2, ARHGGEF15, PPP1R3C, PRKAR2A, ITPR1, PPP1R14B, GNB1, PIK3R3, PLCB4, RAS2, GNG11, ADCY5, PIK3G, PRKCD, CDKN1A, PIK3CB, PIK3CD, ARHGGEF3, PIK3R3, TIMP3, RHOG, RAS2, TIMP1, PIK3CG, PLAUR, PIK3R3, TIMP3, RHOG, RAS2, TIMP1, PIK3CG, PLAUR, TIMP2              | 0.016595969  | PLCB2, PPP1R3C, TUBB, PPP1R14B, PAK1, STMN1, CAMK2D, CAMK2A, ADCY5, PRMT1, PIK3CG, ARHGGEF3, PPP1CA, CCNE2, ARHGGEF15, TUBA4A, ITPR1, CDK1, CCNE1, PRKCD, CDKN1A, PPP1R12A, GNG2, PPP2R1B, PRKCB, CAMK2D                                                                              | 0.005983072 | CDKN1A                              | 0.432513831 |
| Glioma invasiveness Signaling                  | RND3, PLAUR, PLAU                                                                                    | 0.171001532 |                                                                                                                                                                                                                                                                                                                                                                                                 | 0.434510224 |                                                                                                                                                                                                                                                                          |              |                                                                                                                                                                                                                                                                                       |             |                                     |             |
| HER-2 Signaling in Breast Cancer               | CDKN1A, NRG1, PIK3C                                                                                  | 0.250034536 | GRB2, NRG1, MDM2, ITGB8, CCND1, ITGB7, AREG, PIK3R3, RAS2, PRKCD, PIK3CG, CDKN1A, AKT3, CDKN1B, PIK3CB                                                                                                                                                                                                                                                                                          | 0.120781384 | GRB2, NRG1, MDM2, ITGB7, PIK3R3, RAS2, PRKCD, PIK3CG, CDKN1A, PIK3CB, CDKN1B, ITGB5, PIK3C                                                                                                                                                                               | 0.002754229  | CNE2, CCNE1, PRKCD, PIK3CG, CDKN1A, NRG1, MMP2, MAP3K5 (includes EG-4217), PRKCB                                                                                                                                                                                                      | 0.216271852 | CDKN1A                              | 0.348337315 |
| T Cell & B Cell Signal in Rheumatoid Arthritis | IL18, FCER1G, IL1B, CSF2, NFKB1                                                                      | 0.054954087 | TLR2, TLR1, IL1A, IL1B, SPP1, CD80, IL1RN, FCER1G, IL1B, IL6, TLR3, TNFSF13B                                                                                                                                                                                                                                                                                                                    | 0.364753947 | TLR1, HLA-DMA, IL1A, HLA-DQA1, SPP1, HLA-DQA1, HLA-DMB, IL6, HLA-DQB1, TLR2, IL1B, CD80, IL1RN, HLA-DRA, FCER1G, CD80, IL1B                                                                                                                                              | 0.001023293  | TLR1, HLA-DMA, SPP1, IL1A, HLA-DQA1, HLA-DMB, IL6, HLA-DQB1, TLR2, IL1B, CD80, IL1RN, HLA-DRA, FCER1G, CD86, TNFSF13B                                                                                                                                                                 | 0.003090295 | IL1B, SPP1, HLA-DRA, HLA-DQA1       | 0.002570396 |
| AML Signaling                                  | CSF3R, MYC, CSF2RA (includes EG-1438), NFKB1                                                         | 0.124738351 | CSF3R, GRB2, CDND1, SPI1, EF4EBP1, KITLG, PIK3R3, CSF2RB, RAS2, CSF2RA (includes EG-1438), PIK3CG, AKT3, JUP, RUNX1, TCF7L2 (includes EG-6934)                                                                                                                                                                                                                                                  | 0.127350308 | CSF3R, GRB2, CSF3R, EF4EBP1, KITLG, PIK3R3, CSF2RB, RAS2, CSF2RA (includes EG-1438), PIK3CG, PIK3CB, PIK3CD, MAP2K3, JUP, RUNX1, TCF7L2 (includes EG-6934)                                                                                                               | 0.000691831  | NA                                                                                                                                                                                                                                                                                    | #VALUE!     | NA                                  | #VALUE!     |
| Hepatic Fibrosis/Stellate Cell Activation      | IL1R2, IL8, IL1B, NFKB1, BCL2                                                                        | 0.155238701 | IL1A, TNFRSF11B, PDGFA, ACTA2, MYL3, MYH11, IL6, IL1R2, COL1A2, HGF1, CCL2, TIMP1, IGFBP1, LRP, MMP1 (includes EG-4312), TIMP2, IL6, EDNRB, IGFBP1, IGFBP5, MYL9 (includes EG-10398), COL1A1, KDR, TGFBR3, EDNRA, IL1B, AZM, COL3A1                                                                                                                                                             | 0.003548134 | MYH10, IL1A, CCR5, SMAD3, ACTA2, MYL3, MYH11, IL6, IL1R2, CCL2, TIMP1, HGF, ECEL1, TIMP2, IL6, VCAM1, IGFBP5, MMP2, MYL8B, MYL9 (includes EG-10398), KDR, CD14, EDNRA, IL1B, AZM, COL3A1                                                                                 | 7.59E-05     | IL8, CCR5, VCAM1, TGFBR1, EDNRB, TNFRSF1A, MYL3, MYH11, MMP2, IL6, BCL2, COL1A2, MYH9 (includes EG-10398), COL1A1, CCL2, TIMP1, KDR, PDGFRA, CD14, EDNRA, STAT1, FNAB1, TNFRSF11B, COL3A1                                                                                             | 0.000128825 | COL1A2, COL1A1, COL3A1              | 0.060255959 |
| Endothelial Cells in Rheumatoid Arthritis      | IL8, SOC3, SELE, DAAM1, JAK2, NFKB1, IL1B, MYC, IL1R2, IL1B, CSAR1, IL1B, NFATC2, CSF2, IRAK2, PIK3C | 0.001096478 | IL1B, IL1R2, IL1A, CCR3, PDGFA, IL6, FCGRI1A, PDGFC, CREB5, FCGRI1A, CCND1, PDGFC, IL1B, IL1R2, CSAR1, NFAT3, PLCB1, CCL2, DNK3, PIK3CG, AKT3, DNK2, TLR3, MAP3KAP2, TNFSF13B, MAP3K5 (includes EG-4312), ADAMTS4, SFRP4, IL8, SELE, MYO8B, TLR2, PIK3R3, PLCB4, IL1B, RAS2, IL1RN, PRKCD, PLCG2, GNAQ1, FZD3, FZD6, IL1B, TCF7L2 (includes EG-6934), PRSS55, PIK3C                             | 0.128528666 | IL1B, IL1R2, IL1A, CCR3, PDGFA, IL6, FCGRI1A, PDGFC, IL1R2, PLCB1, CSAR1, CCL2, DNK3, PIK3CG, SFRP5, SFRP4, IL8, VCAM1, SELE, DAAM1, PIK3R3, TLR2, PLCB4, IL1B, RAS2, IL1RN, PRKCD, GNAQ1, IL1B, PIK3CB, MAP2K3, PIK3CD, PDGFD, TCF7L2 (includes EG-6934), PRSS55, PIK3C | 0.013803843  | IL1B, IL1R2, IL1A, CCR3, PDGFA, IL6, FCGRI1A, PDGFC, IL1R2, PLCB1, CSAR1, CCL2, DNK3, PIK3CG, SFRP5, SFRP4, IL8, VCAM1, SELE, DAAM1, PIK3R3, TLR2, PLCB4, IL1B, RAS2, IL1RN, PRKCD, GNAQ1, IL1B, PIK3CB, MAP2K3, PIK3CD, GNAQ1, MAP2K3, LRP1, TCF7L2 (includes EG-6934), CSAR1, PIK3C | 0.009549926 | IL1B, C15                           | 0.348140315 |

Table S5B: List of genes from significantly enriched disease pathways in SMC vein grafts at different time points.

[illegible]
